# Supplementary material for: Proteogenomic analysis of human cerebrospinal fluid identifies neurologically relevant regulation and informs causal proteins for Alzheimer’s disease
Source: Research Square preprint supplement (doi:10.21203/rs.3.rs-2814616/v1), 2023-06-09
Supplement: Supplementary file 1 [file 0a03c35446e33a726edcbf1e.xlsx]

## Sheet: Supplementary Tables Legend
Table Number	Description of Table
Table S1	Annotation of aptamers from the SOMAscan 7k assay.
Table S2	Annotation of aptamers from the SOMAscan 5k assay.
Table S3	Demographics of proteomics samples before QC or matching to GWAS data.
Table S4	Summary of sample removal based on step for all samples.
Table S5	Summary statistics of index SNPs in meta-analysis with MAF, most severe variant annotation, beta and p-value in discovery, replication, AT+ samples, AT- samples, and external replication using SOMAscan and Olink (if applicable).
Table S6	Summary of significantly-enriched pathways for all proteins with a pQTL association.
Table S7	Conditional analysis results from GCTA-COJO for each aptamer with a pQTL.
Table S8	Summary of variant annotation using VEP.
Table S9	Summary of conditionally independent variant annotation using VEP
Table S10	Summary of variant annotations from permutations of randomly selected variants
Table S11	Summary of colocalization results between CSF pQTL and Ferkingstad et al. plasma pQTL.
Table S12	Summary of colocalization results between CSF pQTL and Yang et al. plasma pQTL.
Table S13	Summary of colocalization results between CSF pQTL and Yang et al. brain pQTL.
Table S14	Summary of colocalization results between CSF pQTL and GTEx whole blood eQTL.
Table S15	Summary of colocalization results between CSF pQTL and GTEx cortex eQTL.
Table S16	Summary of colocalization results between CSF pQTL and eQTLGen whole blood eQTL.
Table S17	Summary of colocalization results between CSF pQTL and MetaBrain cortex eQTL.
Table S18	Summary of colocalization results between CSF pQTL and MetaBrain cerebellum eQTL.
Table S19	Summary of colocalization results between CSF pQTL and MetaBrain basal ganglia eQTL.
Table S20	Summary of colocalization results between CSF pQTL and MetaBrain hippocampus eQTL
Table S21	Summary of colocalization results between CSF pQTL and MetaBrain spinal cord eQTL.
Table S22	Summary of colocalization results between CSF pQTL and Microglia-specific eQTL.
Table S23	Summary of all colocalization analyses with external pQTL and eQTL datasets.
Table S24	Summary of the pleiotropic nature of each pQTL region.
Table S25	Cell-type data used to calculate cell-type specificity.
Table S26	Cell-type enrichment for all groups of proteins.
Table S27	Summary of significantly-enriched pathways for proteins with associations in the chr3 pleiotropic region.
Table S28	Summary of pheWAS results for index variants located in the chr3 pleiotropic region.
Table S29	Summary of significantly-enriched pathways for proteins with associations in the chr6 pleiotropic region.
Table S30	Summary of pheWAS results for index variants located in the chr6 pleiotropic region.
Table S31	Summary of significantly-enriched pathways for proteins with associations in the chr19 pleiotropic region.
Table S32	Summary of pheWAS results for index variants located in the chr19 pleiotropic region.
Table S33	PWAS summary output for each protein-variant association region based on meta-analysis.
Table S34	Summary of significantly-enriched pathways for PWAS-significant proteins.
Table S35	Summary of significantly-enriched pathways for PWAS-significant proteins, excl. APOE region.
Table S36	Wald Ratio and IVW analyses for Mendelian randomization.
Table S37	Mendelian Randomization summary output for each analyte with a pQTL for AD risk.
Table S38	MR-Steiger test results for directionality.
Table S39	Single-variant colocalization with AD GWAS for all index variants.
Table S40	Multiple causal variant colocalization with AD GWAS for applicable index variants.
Table S41	Summary of PWAS, COLOC, and MR results for 48 aptamers significant through at least two of those methods.
Table S42	Summary of significantly-enriched pathways for proteins overlapping between at least two of PWAS, COLOC, and MR
Table S43	Wald Ratio and IVW analyses for cis-only Mendelian randomization.
Table S44	Summary of AUC values calculated for proteomic risk score and polygenic risk score analysis.
Table S45	Summary of P-values for AUC comparisons calculated through risk score analysis.
Table S46	Information for location of cis MR variants in pleiotropic regions.

## Sheet: Table S1
Table S1. Annotation of aptamers from the SOMAscan 7k assay.
SeqId	SeqIdVersion	SomaId	TargetFullName	Target	UniProt	EntrezGeneID	EntrezGeneSymbol	Organism	Units	Type	Dilution	NormGroup		Data Dictionary
10000-28	3	SL019233	Beta-crystallin B2	CRBB2	P43320	1415	CRYBB2	Human	RFU	Protein	20	S1		SeqID	Somalogic-supplied aptamer ID
10001-7	3	SL002564	RAF proto-oncogene serine/threonine-protein kinase	c-Raf	P04049	5894	RAF1	Human	RFU	Protein	20	S1		SeqIdVersion	Version of the aptamer
10003-15	3	SL019245	Zinc finger protein 41	ZNF41	P51814	7592	ZNF41	Human	RFU	Protein	20	S1		SomaID	Somalogic-supplied ID
10006-25	3	SL019228	ETS domain-containing protein Elk-1	ELK1	P19419	2002	ELK1	Human	RFU	Protein	20	S2		TargetFullName	Full name of protein targeted by the aptamer
10008-43	3	SL019234	Guanylyl cyclase-activating protein 1	GUC1A	P43080	2978	GUCA1A	Human	RFU	Protein	20	S1		Target	Short name of protein targeted by aptamer
10010-10	3	SL014943	Beclin-1	BECN1	Q14457	8678	BECN1	Human	RFU	Protein	20	S1		UniProt	UniProtID corresponding to the targeted protein
10011-65	3	SL019246	Inositol polyphosphate 5-phosphatase OCRL-1	OCRL	Q01968	4952	OCRL	Human	RFU	Protein	20	S2		EntrezGeneID	Entrez ID number of the gene corresponding to the targeted protein
10012-5	3	SL014669	SAM pointed domain-containing Ets transcription factor	SPDEF	O95238	25803	SPDEF	Human	RFU	Protein	20	S1		EntrezGeneSymbol	Entrez symbol of the gene corresponding to the targeted protein
10014-31	3	SL007803	Zinc finger protein SNAI2	SLUG	O43623	6591	SNAI2	Human	RFU	Protein	20	S1		NormGroup	Somalogic-defined normalization group
10015-119	3	SL014924	Voltage-gated potassium channel subunit beta-2	KCAB2	Q13303	8514	KCNAB2	Human	RFU	Protein	20	S1
10022-207	3	SL019229	DNA polymerase eta	POLH	Q9Y253	5429	POLH	Human	RFU	Protein	20	S1
10023-32	3	SL004071	Vitamin D3 receptor	VDR	P11473	7421	VDR	Human	RFU	Protein	20	S1
10024-44	3	SL019235	4-hydroxy-2-oxoglutarate aldolase, mitochondrial	HOGA1	Q86XE5	112817	HOGA1	Human	RFU	Protein	20	S1
10025-1	3	SL008018	Dihydrolipoyl dehydrogenase, mitochondrial	DLDH	P09622	1738	DLD	Human	RFU	Protein	20	S2
10030-8	3	SL006373	Adenine DNA glycosylase	MutY homolog	Q9UIF7	4595	MUTYH	Human	RFU	Protein	20	S1
10035-6	3	SL007389	Dual specificity protein phosphatase 4	DUS4	Q13115	1846	DUSP4	Human	RFU	Protein	20	S1
10037-98	3	SL025986	Sialic acid-binding Ig-like lectin 12:Ig-like V-type 2 domain, Isoform long	SIG12:Ig-like V-type 2	Q96PQ1	89858	SIGLEC12	Human	RFU	Protein	20	S1
10039-32	3	SL005262	Purine nucleoside phosphorylase	PNP	P00491	4860	PNP	Human	RFU	Protein	20	S2
10040-63	3	SL007662	Tumor protein 63	P73L	Q9H3D4	8626	TP63	Human	RFU	Protein	20	S1
10041-3	3	SL007226	Hepatocyte nuclear factor 4-alpha	HNF4A	P41235	3172	HNF4A	Human	RFU	Protein	20	S2
10042-8	3	SL015131	Serine/threonine-protein kinase Sgk3	SGK3	Q96BR1	100533105	SGK3	Human	RFU	Protein	20	S1
10043-31	3	SL019249	Bromodomain-containing protein 4	BRD4	O60885	23476	BRD4	Human	RFU	Protein	20	S1
10045-47	3	SL010989	Cullin-3	CUL3	Q13618	8452	CUL3	Human	RFU	Protein	20	S2
10046-55	3	SL003727	Baculoviral IAP repeat-containing protein 2	cIAP-1	Q13490	329	BIRC2	Human	RFU	Protein	20	S1
10047-12	3	SL004553	Neutrophil cytosol factor 2	NCF-2	P19878	4688	NCF2	Human	RFU	Protein	20	S2
10048-7	3	SL011998	Core-binding factor subunit beta	PEBB	Q13951	865	CBFB	Human	RFU	Protein	20	S2
10049-112	3	SL019242	Telomeric repeat-binding factor 1	TERF1	P54274	7013	TERF1	Human	RFU	Protein	20	S1
10053-5	3	SL004474	Integrin-linked protein kinase	ILK1	Q13418	3611	ILK	Human	RFU	Protein	20	S2
10054-3	3	SL019232	Gigaxonin	GAN	Q9H2C0	8139	GAN	Human	RFU	Protein	20	S1
10056-5	3	SL007372	Forkhead box protein M1	FOXM1	Q08050	2305	FOXM1	Human	RFU	Protein	20	S2
10058-1	3	SL013796	UV excision repair protein RAD23 homolog A	RD23A	P54725	5886	RAD23A	Human	RFU	Protein	20	S2
10063-10	3	SL019237	E3 ubiquitin-protein ligase FANCL	FANCL	Q9NW38	55120	FANCL	Human	RFU	Protein	20	S1
10064-12	3	SL011550	Putative hydrolase RBBP9	RBBP9	O75884	10741	RBBP9	Human	RFU	Protein	20	S2
10069-2	3	SL013908	Peptidyl-prolyl cis-trans isomerase NIMA-interacting 1	PIN1	Q13526	5300	PIN1	Human	RFU	Protein	20	S1
10070-22	3	SL016406	1-phosphatidylinositol 4,5-bisphosphate phosphodiesterase gamma-2	PLCG2	P16885	5336	PLCG2	Human	RFU	Protein	20	S1
10073-22	3	SL011411	Tyrosyl-DNA phosphodiesterase 1	TYDP1	Q9NUW8	55775	TDP1	Human	RFU	Protein	20	S2
10074-128	3	SL014748	Bromodomain-containing protein 2	BRD2	P25440	6046	BRD2	Human	RFU	Protein	20	S1
10075-75	3	SL019254	Acyl-CoA-binding domain-containing protein 6	ACBD6	Q9BR61	84320	ACBD6	Human	RFU	Protein	20	S1
10076-1	3	SL019225	AP-4 complex subunit mu-1	AP4M1	O00189	9179	AP4M1	Human	RFU	Protein	20	S1
10078-5	3	SL007063	BAG family molecular chaperone regulator 3	BAG3	O95817	9531	BAG3	Human	RFU	Protein	20	S1
10080-9	3	SL019240	Translation initiation factor eIF-2B subunit alpha	EI2BA	Q14232	1967	EIF2B1	Human	RFU	Protein	20	S2
10081-17	3	SL019243	DNA-binding protein SATB2	SATB2	Q9UPW6	23314	SATB2	Human	RFU	Protein	20	S1
10082-251	3	SL019251	Neurofilament light polypeptide	NFL	P07196	4747	NEFL	Human	RFU	Protein	20	S2
10085-25	3	SL001714	Steroidogenic acute regulatory protein, mitochondrial	STAR	P49675	6770	STAR	Human	RFU	Protein	20	S2
10086-39	3	SL018882	Cystathionine beta-synthase	CBS	P35520	102724560	CBS	Human	RFU	Protein	20	S1
10087-10	3	SL003675	Alpha-crystallin A chain	Alpha crystallin A chain	P02489	102724652	CRYAA	Human	RFU	Protein	20	S1
10088-37	3	SL008014	Adenine phosphoribosyltransferase	APT	P07741	353	APRT	Human	RFU	Protein	20	S1
10089-7	3	SL019244	N-acetylserotonin O-methyltransferase-like protein	ASML	O95671	8623	ASMTL	Human	RFU	Protein	20	S1
10336-3	3	SL019100	E3 ubiquitin-protein ligase CHIP	CHIP	Q9UNE7	10273	STUB1	Human	RFU	Protein	20	S2
10339-48	3	SL001731	Gamma-enolase	NSE	P09104	2026	ENO2	Human	RFU	Protein	20	S2
10342-55	3	SL019096	E3 SUMO-protein ligase PIAS4	PIAS4	Q8N2W9	51588	PIAS4	Human	RFU	Protein	20	S1
10346-5	3	SL007221	Signal transducer and activator of transcription 3	STAT3	P40763	6774	STAT3	Human	RFU	Protein	20	S2
10351-51	3	SL007108	Interferon regulatory factor 1	IRF1	P10914	3659	IRF1	Human	RFU	Protein	20	S2
10354-57	3	SL007221	Signal transducer and activator of transcription 3	STAT3	P40763	6774	STAT3	Human	RFU	Protein	20	S2
10356-21	3	SL000455	Transcription factor AP-1	c-Jun	P05412	3725	JUN	Human	RFU	Protein	20	S1
10361-25	3	SL014684	2'-5'-oligoadenylate synthase 1	OAS1	P00973	4938	OAS1	Human	RFU	Protein	20	S1
10362-35	3	SL002565	Myc proto-oncogene protein	c-Myc	P01106	4609	MYC	Human	RFU	Protein	20	S1
10363-13	3	SL004097	Mothers against decapentaplegic homolog 3	SMAD3	P84022	4088	SMAD3	Human	RFU	Protein	20	S2
10364-6	3	SL004101	Mothers against decapentaplegic homolog 2	SMAD2	Q15796	4087	SMAD2	Human	RFU	Protein	20	S1
10365-132	3	SL005184	Interleukin-23	IL-23	P29460|Q9NPF7	3593|51561	IL12B|IL23A	Human	RFU	Protein	20	S1
10366-11	3	SL001728	Platelet-derived growth factor receptor alpha	PDGFRA	P16234	5156	PDGFRA	Human	RFU	Protein	20	S2
10367-62	3	SL001716	Interleukin-12	IL-12	P29459|P29460	3592|3593	IL12A|IL12B	Human	RFU	Protein	20	S1
10370-21	3	SL004396	Signal transducer and activator of transcription 1-alpha/beta	STAT1	P42224	6772	STAT1	Human	RFU	Protein	20	S2
10372-18	3	SL007229	Signal transducer and activator of transcription 6	STAT6	P42226	6778	STAT6	Human	RFU	Protein	20	S2
10382-1	3	SL006803	Angiopoietin-related protein 3	ANGL3	Q9Y5C1	27329	ANGPTL3	Human	RFU	Protein	20	S2
10390-21	3	SL018971	E3 ubiquitin-protein ligase ZNRF3	ZNRF3	Q9ULT6	84133	ZNRF3	Human	RFU	Protein	20	S1
10391-1	3	SL006803	Angiopoietin-related protein 3	ANGL3	Q9Y5C1	27329	ANGPTL3	Human	RFU	Protein	20	S2
10396-6	3	SL003755	Induced myeloid leukemia cell differentiation protein Mcl-1	Mcl-1	Q07820	4170	MCL1	Human	RFU	Protein	20	S2
10398-110	3	SL019275	Ankyrin repeat domain-containing protein 1	ANKR1	Q15327	27063	ANKRD1	Human	RFU	Protein	20	S1
10418-36	3	SL011111	Syntaxin-12	STX12	Q86Y82	23673	STX12	Human	RFU	Protein	20	S2
10419-1	3	SL014110	Scavenger receptor class A member 5	SCAR5	Q6ZMJ2	286133	SCARA5	Human	RFU	Protein	20	S1
10420-30	3	SL018037	Fas apoptotic inhibitory molecule 1	FAIM1	Q9NVQ4	55179	FAIM	Human	RFU	Protein	20	S1
10425-3	3	SL017972	Beta-1,4-galactosyltransferase 5	B4GT5	O43286	9334	B4GALT5	Human	RFU	Protein	20	S1
10428-1	3	SL018045	Killer cell immunoglobulin-like receptor 2DS2	KI2S2	P43631	100132285	KIR2DS2	Human	RFU	Protein	20	S2
10430-31	3	SL025780	4F2 cell-surface antigen heavy chain:Cytoplasmic domain	4F2:CD	P08195	6520	SLC3A2	Human	RFU	Protein	20	S1
10432-3	3	SL018002	Uncharacterized protein KIAA1644	K1644	Q3SXP7	85352	SHISAL1	Human	RFU	Protein	20	S1
10435-2	3	SL008645	N(4)-(beta-N-acetylglucosaminyl)-L-asparaginase	ASPG	P20933	175	AGA	Human	RFU	Protein	20	S2
10438-19	3	SL007128	Granulocyte-macrophage colony-stimulating factor receptor subunit alpha	CSF2R	P15509	1438	CSF2RA	Human	RFU	Protein	20	S2
10439-57	3	SL005393	Alpha-amylase 2B	Alpha-amylase 2B	P19961	280	AMY2B	Human	RFU	Protein	20	S1
10440-26	3	SL025782	CXADR-like membrane protein:Extracellular domain	ACAM:ECD	Q9H6B4	79827	CLMP	Human	RFU	Protein	20	S2
10442-1	3	SL018089	Transmembrane protein 190	TM190	Q8WZ59	147744	TMEM190	Human	RFU	Protein	20	S1
10445-20	3	SL004747	Apolipoprotein M	ApoM	O95445	55937	APOM	Human	RFU	Protein	20	S2
10447-18	3	SL018138	Polyadenylate-binding protein 3	PABP3	Q9H361	5042	PABPC3	Human	RFU	Protein	20	S2
10449-31	3	SL008887	Protein shisa-2 homolog	TMM46	Q6UWI4	387914	SHISA2	Human	RFU	Protein	20	S1
10451-11	3	SL008914	Nucleobindin-1	NUCB1	Q02818	4924	NUCB1	Human	RFU	Protein	20	S2
10453-7	3	SL018233	Carcinoembryonic antigen-related cell adhesion molecule 20	CEA20	Q6UY09	125931	CEACAM20	Human	RFU	Protein	20	S1
10454-99	3	SL018290	DnaJ homolog subfamily C member 16	DJC16	Q9Y2G8	23341	DNAJC16	Human	RFU	Protein	20	S1
10455-196	3	SL004678	Interleukin-31	IL-31	Q6EBC2	386653	IL31	Human	RFU	Protein	20	S1
10457-3	3	SL004861	Interleukin-18 receptor accessory protein	IL-18 Rb	O95256	8807	IL18RAP	Human	RFU	Protein	20	S1
10462-14	3	SL012880	Insulin-like peptide INSL5	INSL5	Q9Y5Q6	10022	INSL5	Human	RFU	Protein	20	S1
10463-23	3	SL002514	Intestinal-type alkaline phosphatase	Alkaline phosphatase, intestine	P09923	248	ALPI	Human	RFU	Protein	20	S2
10464-6	3	SL008696	Anthrax toxin receptor 1	ANTR1	Q9H6X2	84168	ANTXR1	Human	RFU	Protein	20	S1
10472-53	3	SL004145	Tumor necrosis factor receptor superfamily member 14	HVEM	Q92956	8764	TNFRSF14	Human	RFU	Protein	20	S1
10473-2	3	SL002602	Trefoil factor 2	Trefoil factor 2	Q03403	7032	TFF2	Human	RFU	Protein	20	S1
10479-18	3	SL000645	Stromelysin-2	MMP-10	P09238	4319	MMP10	Human	RFU	Protein	20	S2
10480-33	3	SL004557	CD59 glycoprotein	CD59	P13987	966	CD59	Human	RFU	Protein	20	S1
10490-3	3	SL025976	Dolichyl-diphosphooligosaccharide--protein glycosyltransferase subunit 1:Cytoplasmic domain	RPN1:CD	P04843	6184	RPN1	Human	RFU	Protein	20	S2
10496-11	3	SL009322	Calcium-activated chloride channel regulator 1	CaCC	A8K7I4	1179	CLCA1	Human	RFU	Protein	20	S2
10499-1	3	SL008733	Transmembrane protein 106A	T106A	Q96A25	113277	TMEM106A	Human	RFU	Protein	20	S2
10505-12	3	SL018629	E3 ubiquitin-protein ligase RNF43	RNF43	Q68DV7	54894	RNF43	Human	RFU	Protein	20	S1
10506-53	3	SL007962	Membrane-associated progesterone receptor component 2	PGRC2	O15173	10424	PGRMC2	Human	RFU	Protein	20	S2
10507-166	3	SL009308	Acrosomal protein SP-10	sperm protein 10	P26436	56	ACRV1	Human	RFU	Protein	20	S1
10510-62	3	SL018612	SLP adapter and CSK-interacting membrane protein	SCIMP	Q6UWF3	388325	SCIMP	Human	RFU	Protein	20	S1
10512-13	3	SL025888	Cytokine receptor common subunit beta:Extracellular domain	IL3RB:ECD	P32927	1439	CSF2RB	Human	RFU	Protein	20	S1
10513-13	3	SL018613	Calsenilin	CSEN	Q9Y2W7	30818	KCNIP3	Human	RFU	Protein	20	S1
10514-5	3	SL005360	Prostaglandin-H2 D-isomerase	PGD2 synthase	P41222	5730	PTGDS	Human	RFU	Protein	20	S3
10521-10	3	SL025939	Matrix-remodeling-associated protein 8:Extracellular domain	MXRA8:ECD	Q9BRK3	54587	MXRA8	Human	RFU	Protein	20	S2
10527-22	3	SL013075	ATP-dependent RNA helicase A	DHX9	Q08211	1660	DHX9	Human	RFU	Protein	20	S2
10528-2	3	SL008734	Dipeptidase 1	DPEP1	P16444	1800	DPEP1	Human	RFU	Protein	20	S1
10530-8	3	SL016414	Proteasome subunit beta type-6	PSB6	P28072	5694	PSMB6	Human	RFU	Protein	20	S1
10531-18	3	SL010845	GTPase NRas	RASN	P01111	4893	NRAS	Human	RFU	Protein	20	S2
10534-40	3	SL025953	Poly [ADP-ribose] polymerase 1:BRCA1 C-terminal:BRCA1 C-terminus domian	PARP:BRCT domain	P09874	142	PARP1	Human	RFU	Protein	20	S1
10539-30	3	SL014293	CD99 antigen-like protein 2	C99L2	Q8TCZ2	83692	CD99L2	Human	RFU	Protein	20	S2
10546-2	3	SL012744	Thrombospondin-type laminin G domain and EAR repeat-containing protein	TSEAR	Q8WU66	54084	TSPEAR	Human	RFU	Protein	20	S2
10550-37	3	SL004132	Bone morphogenetic protein receptor type-1B	BMP RIB	O00238	658	BMPR1B	Human	RFU	Protein	20	S1
10551-7	3	SL007008	Linker for activation of T-cells family member 1	LAT	O43561	27040	LAT	Human	RFU	Protein	20	S2
10552-88	3	SL017983	NKG2-F type II integral membrane protein	NKG2F	O43908	8302	KLRC4	Human	RFU	Protein	20	S1
10553-8	3	SL017988	Torsin-1A-interacting protein 2	TOIP2	Q8NFQ8	163590	TOR1AIP2	Human	RFU	Protein	20	S2
10557-6	3	SL018003	Testis-expressed sequence 29 protein	TEX29	Q8N6K0	121793	TEX29	Human	RFU	Protein	20	S2
10558-26	3	SL008436	Protocadherin-9	PCDH9	Q9HC56	5101	PCDH9	Human	RFU	Protein	20	S2
10560-1	3	SL025895	Integral membrane protein 2C:N-term	ITM2C:N-term	Q9NQX7	81618	ITM2C	Human	RFU	Protein	20	S1
10561-5	3	SL004512	Peptidoglycan recognition protein 3	PGRP-I-alpha	Q96LB9	114771	PGLYRP3	Human	RFU	Protein	20	S1
10562-42	3	SL015086	Neuropilin and tolloid-like protein 2	NETO2	Q8NC67	81831	NETO2	Human	RFU	Protein	20	S2
10563-13	3	SL018021	LysM and putative peptidoglycan-binding domain-containing protein 3	LYSM3	Q7Z3D4	116068	LYSMD3	Human	RFU	Protein	20	S1
10565-19	3	SL017951	SLIT and NTRK-like protein 3	SLIK3	O94933	22865	SLITRK3	Human	RFU	Protein	20	S2
10569-28	3	SL012443	Microfibrillar-associated protein 2	MFAP2	P55001	4237	MFAP2	Human	RFU	Protein	20	S2
10571-14	3	SL018096	Alpha-1,3-mannosyl-glycoprotein 2-beta-N-acetylglucosaminyltransferase	MGAT1	P26572	4245	MGAT1	Human	RFU	Protein	20	S1
10572-65	3	SL012372	Cystatin-8	CST8	O60676	10047	CST8	Human	RFU	Protein	20	S2
10574-10	3	SL000283	Beta-2-microglobulin	b2-Microglobulin	P61769	567	B2M	Human	RFU	Protein	20	S2
10575-31	3	SL018139	Poly(U)-binding-splicing factor PUF60	PUF60	Q9UHX1	22827	PUF60	Human	RFU	Protein	20	S2
10576-7	3	SL025965	Plexin domain-containing protein 2:Extracellular domain	PXDC2:ECD	Q6UX71	84898	PLXDC2	Human	RFU	Protein	20	S2
10580-14	3	SL012586	Surfactant-associated protein 2	SFTA2	Q6UW10	389376	SFTA2	Human	RFU	Protein	20	S1
10582-36	3	SL018286	Protein O-mannose kinase	SG196	Q9H5K3	84197	POMK	Human	RFU	Protein	20	S2
10583-1	3	SL018282	Transmembrane protein 108	TM108	Q6UXF1	66000	TMEM108	Human	RFU	Protein	20	S1
10584-7	3	SL018289	NADH dehydrogenase [ubiquinone] iron-sulfur protein 4, mitochondrial	NDUS4	O43181	4724	NDUFS4	Human	RFU	Protein	20	S1
10588-39	3	SL011395	Lactosylceramide alpha-2,3-sialyltransferase	SIAT9	Q9UNP4	8869	ST3GAL5	Human	RFU	Protein	20	S1
10589-7	3	SL018354	Retinoic acid early transcript 1L protein	RET1L	Q5VY80	154064	RAET1L	Human	RFU	Protein	20	S2
10605-22	3	SL004748	Adipocyte plasma membrane-associated protein	APMAP	Q9HDC9	57136	APMAP	Human	RFU	Protein	20	S1
10606-34	3	SL026012	Torsin-1A-interacting protein 1:Perinuclear domain	TOIP1:Perinuclear	Q5JTV8	26092	TOR1AIP1	Human	RFU	Protein	20	S2
10608-9	3	SL012418	Histatin-1	HIS1	P15515	3346	HTN1	Human	RFU	Protein	20	S1
10612-18	3	SL008694	Procollagen-lysine,2-oxoglutarate 5-dioxygenase 3	PLOD3	O60568	8985	PLOD3	Human	RFU	Protein	20	S2
10613-33	3	SL018589	Protein CASC4	CASC4	Q6P4E1	113201	GOLM2	Human	RFU	Protein	20	S2
10615-18	3	SL008066	Myelin protein P0	MYP0	P25189	4359	MPZ	Human	RFU	Protein	20	S2
10616-67	3	SL017477	Podocalyxin-like protein 2	PDXL2	Q9NZ53	50512	PODXL2	Human	RFU	Protein	20	S1
10618-190	3	SL004439	Low-density lipoprotein receptor-related protein 2	megalin	P98164	4036	LRP2	Human	RFU	Protein	20	S1
10620-21	3	SL000548	Beta-microseminoprotein	PSP-94	P08118	4477	MSMB	Human	RFU	Protein	20	S2
10621-26	3	SL018592	Protein Largen	PRR16	Q569H4	51334	PRR16	Human	RFU	Protein	20	S1
10623-19	3	SL025933	Mucin-1:region 1	MUC1:region 1	P15941	4582	MUC1	Human	RFU	Protein	20	S1
10624-45	3	SL018582	Serine protease inhibitor Kazal-type 13	ISK13	Q1W4C9	153218	SPINK13	Human	RFU	Protein	20	S1
10626-116	3	SL018611	Alpha-N-acetylgalactosaminide alpha-2,6-sialyltransferase 3	SIA7C	Q8NDV1	256435	ST6GALNAC3	Human	RFU	Protein	20	S1
10627-87	3	SL007366	Amyloid-like protein 2	APLP2	Q06481	334	APLP2	Human	RFU	Protein	20	S2
10630-5	3	SL007633	Oxidoreductase HTATIP2	HTAI2	Q9BUP3	10553	HTATIP2	Human	RFU	Protein	20	S2
10631-9	3	SL007962	Membrane-associated progesterone receptor component 2	PGRC2	O15173	10424	PGRMC2	Human	RFU	Protein	20	S2
10636-1	3	SL025932	Cell surface glycoprotein CD200 receptor 1:Isoform 4, Cytoplasmic Domain	MO2R1:CD	Q8TD46	131450	CD200R1	Human	RFU	Protein	20	S1
10637-50	3	SL025903	UPF0577 protein KIAA1324:Extracellular domain	K1324:ECD	Q6UXG2	57535	ELAPOR1	Human	RFU	Protein	20	S1
10638-1	3	SL018685	TERF1-interacting nuclear factor 2	TINF2	Q9BSI4	26277	TINF2	Human	RFU	Protein	20	S1
10643-16	3	SL025948	Noelin-3:Isoform 2, C-term	NOE3:C-term	Q96PB7	118427	OLFM3	Human	RFU	Protein	20	S2
10647-18	3	SL017894	Activating signal cointegrator 1 complex subunit 1	ASCC1	Q8N9N2	51008	ASCC1	Human	RFU	Protein	20	S2
10663-42	3	SL018014	Insulin-induced gene 1 protein	INSI1	O15503	3638	INSIG1	Human	RFU	Protein	20	S1
10666-7	3	SL012791	N-acetylglucosamine-1-phosphotransferase subunit gamma	GNPTG	Q9UJJ9	84572	GNPTG	Human	RFU	Protein	20	S2
10667-78	3	SL018036	Uncharacterized protein C1orf185	CA185	Q5T7R7	284546	C1orf185	Human	RFU	Protein	20	S1
10668-5	3	SL007377	Syntaxin-4	STX4	Q12846	6810	STX4	Human	RFU	Protein	20	S2
10672-75	3	SL004483	Pulmonary surfactant-associated protein B	SP-B	P07988	6439	SFTPB	Human	RFU	Protein	20	S2
10693-43	3	SL025910	Killer cell lectin-like receptor subfamily G member 2:C-term	KLRG2:C-term	A4D1S0	346689	KLRG2	Human	RFU	Protein	20	S1
10695-12	3	SL012662	Protein WFDC10B	WF10B	Q8IUB3	280664	WFDC10B	Human	RFU	Protein	20	S1
10699-52	3	SL018603	Prolow-density lipoprotein receptor-related protein 1	LRP1	Q07954	4035	LRP1	Human	RFU	Protein	20	S2
10700-10	3	SL025885	Immunoglobulin superfamily member 11:Cytoplasmic domain	IGS11:CD	Q5DX21	152404	IGSF11	Human	RFU	Protein	20	S2
10702-1	3	SL012521	Collagen alpha-1(XXVIII) chain	COSA1	Q2UY09	340267	COL28A1	Human	RFU	Protein	20	S2
10703-203	3	SL006737	Sin3 histone deacetylase corepressor complex component SDS3	SDS3	Q9H7L9	64426	SUDS3	Human	RFU	Protein	20	S2
10704-91	3	SL018605	Lymphoid-restricted membrane protein	LRMP	Q12912	4033	IRAG2	Human	RFU	Protein	20	S1
10705-14	3	SL018611	Alpha-N-acetylgalactosaminide alpha-2,6-sialyltransferase 3	SIA7C	Q8NDV1	256435	ST6GALNAC3	Human	RFU	Protein	20	S1
10708-3	3	SL007007	Progonadoliberin-2	GON2	O43555	2797	GNRH2	Human	RFU	Protein	20	S1
10710-23	3	SL012618	Zona pellucida-binding protein 2	ZPBP2	Q6X784	124626	ZPBP2	Human	RFU	Protein	20	S1
10713-151	3	SL017073	CMRF35-like molecule 7	CLM7	A8K4G0	124599	CD300LB	Human	RFU	Protein	20	S1
10714-7	3	SL000269	Angiotensin-converting enzyme	ACE	P12821	1636	ACE	Human	RFU	Protein	20	S2
10716-35	3	SL010942	26S proteasome non-ATPase regulatory subunit 5	PSMD5	Q16401	5711	PSMD5	Human	RFU	Protein	20	S1
10721-76	3	SL000451	Heat shock 70 kDa protein 1A	HSP 70	P0DMV8	3303	HSPA1A	Human	RFU	Protein	20	S2
10722-13	3	SL025912	Tyrosine-protein kinase SYK:Protein kinase domain	KSYK:Protein Kinase	P43405	6850	SYK	Human	RFU	Protein	20	S2
10737-96	3	SL005397	Leukocyte elastase inhibitor	Serpin B1	P30740	1992	SERPINB1	Human	RFU	Protein	20	S2
10738-11	3	SL004460	Fibulin-5	fibulin 5	Q9UBX5	10516	FBLN5	Human	RFU	Protein	20	S2
10741-22	3	SL002684	Macrophage colony-stimulating factor 1	CSF-1	P09603	1435	CSF1	Human	RFU	Protein	20	S2
10743-13	3	SL008760	SLIT and NTRK-like protein 1	SLIK1	Q96PX8	114798	SLITRK1	Human	RFU	Protein	20	S2
10746-24	3	SL009412	Dickkopf-related protein 3	DKK3	Q9UBP4	27122	DKK3	Human	RFU	Protein	20	S2
10748-216	3	SL018468	Protocadherin beta-2	PCDB2	Q9Y5E7	56133	PCDHB2	Human	RFU	Protein	20	S1
10749-18	3	SL000451	Heat shock 70 kDa protein 1A	HSP 70	P0DMV8	3303	HSPA1A	Human	RFU	Protein	20	S2
10752-8	3	SL018591	Chromodomain Y-like protein 2	CDYL2	Q8N8U2	124359	CDYL2	Human	RFU	Protein	20	S2
10753-31	3	SL018585	Disintegrin and metalloproteinase domain-containing protein 7	ADAM7	Q9H2U9	8756	ADAM7	Human	RFU	Protein	20	S2
10754-113	3	SL005237	Prokineticin-2	Prokineticin-2	Q9HC23	60675	PROK2	Human	RFU	Protein	20	S2
10756-34	3	SL012761	Urocortin-3	UCN3	Q969E3	114131	UCN3	Human	RFU	Protein	20	S2
10758-2	3	SL012375	Keratocan	KERA	O60938	11081	KERA	Human	RFU	Protein	20	S2
10760-107	3	SL018367	Glutamate receptor 4	GRIA4	P48058	2893	GRIA4	Human	RFU	Protein	20	S2
10761-5	3	SL006541	Transmembrane emp24 domain-containing protein 2	TMED2	Q15363	10959	TMED2	Human	RFU	Protein	20	S2
10762-2	3	SL025911	Killer cell lectin-like receptor subfamily G member 2:N-term	KLRG2:N-term	A4D1S0	346689	KLRG2	Human	RFU	Protein	20	S2
10767-52	3	SL018836	G-protein coupled receptor 64	GPR64	Q8IZP9	10149	ADGRG2	Human	RFU	Protein	20	S1
10780-10	3	SL008723	Ras-related protein Rab-3D	RAB3D	O95716	9545	RAB3D	Human	RFU	Protein	20	S1
10781-19	3	SL008886	C-type lectin domain family 4 member G	CLC4G	Q6UXB4	339390	CLEC4G	Human	RFU	Protein	20	S2
10785-8	3	SL018337	Leucine-rich repeat-containing protein 52	LRC52	Q8N7C0	440699	LRRC52	Human	RFU	Protein	20	S2
10798-4	3	SL018456	CMRF35-like molecule 2	CLM2	Q496F6	342510	CD300E	Human	RFU	Protein	20	S1
10800-15	3	SL003668	Serpin H1	Collagen-binding protein	P50454	871	SERPINH1	Human	RFU	Protein	20	S2
10801-11	3	SL004843	Ephrin-A2	Ephrin-A2	O43921	1943	EFNA2	Human	RFU	Protein	20	S2
10809-14	3	SL018479	Killer cell lectin-like receptor subfamily B member 1	KLRB1	Q12918	3820	KLRB1	Human	RFU	Protein	20	S1
10814-7	3	SL016708	T-cell surface glycoprotein CD1a	CD1A	P06126	909	CD1A	Human	RFU	Protein	20	S1
10815-2	3	SL018601	Intracellular hyaluronan-binding protein 4	HABP4	Q5JVS0	22927	HABP4	Human	RFU	Protein	20	S1
10816-150	3	SL022717	Paired immunoglobulin-like type 2 receptor alpha isoform FDF03-M14	PILRA isoform FDF03-M14	Q9UKJ1	29992	PILRA	Human	RFU	Protein	20	S2
10817-26	3	SL018588	TOMM20-like protein 1	TO20L	Q6UXN7	387990	TOMM20L	Human	RFU	Protein	20	S2
10818-36	3	SL008921	Sphingomyelin phosphodiesterase	ASM	P17405	6609	SMPD1	Human	RFU	Protein	20	S2
10819-108	3	SL004461	Fibulin-1	fibulin 1	P23142	2192	FBLN1	Human	RFU	Protein	20	S3
10825-12	3	SL018584	V-set and immunoglobulin domain-containing protein 10	VSI10	Q8N0Z9	54621	VSIG10	Human	RFU	Protein	20	S1
10827-67	3	SL018590	Leucine-rich repeat and immunoglobulin-like domain-containing nogo receptor-interacting protein 3	LIGO3	P0C6S8	645191	LINGO3	Human	RFU	Protein	20	S2
10830-5	3	SL025899	EF-hand calcium-binding domain-containing protein 14:N-term	K0494:N-term	O75071	9813	EFCAB14	Human	RFU	Protein	20	S1
10832-24	3	SL018597	Beta-1,4-galactosyltransferase 6	B4GT6	Q9UBX8	9331	B4GALT6	Human	RFU	Protein	20	S2
10833-64	3	SL012788	Hedgehog-interacting protein	HHIP	Q96QV1	64399	HHIP	Human	RFU	Protein	20	S2
10835-25	3	SL018593	Alpha-1,4-N-acetylglucosaminyltransferase	A4GCT	Q9UNA3	51146	A4GNT	Human	RFU	Protein	20	S2
10842-7	3	SL018620	Beta-1,3-galactosyl-O-glycosyl-glycoprotein beta-1,6-N-acetylglucosaminyltransferase 4	GCNT4	Q9P109	51301	GCNT4	Human	RFU	Protein	20	S1
10847-1	3	SL018624	Sialic acid-binding Ig-like lectin 15	SIG15	Q6ZMC9	284266	SIGLEC15	Human	RFU	Protein	20	S2
10848-137	3	SL018632	Butyrophilin-like protein 3	BTNL3	Q6UXE8	10917	BTNL3	Human	RFU	Protein	20	S1
10851-77	3	SL007417	Interleukin-27 subunit beta	IL27B	Q14213	10148	EBI3	Human	RFU	Protein	20	S2
10852-114	3	SL012987	Heterogeneous nuclear ribonucleoprotein D-like	HNRDL	O14979	9987	HNRNPDL	Human	RFU	Protein	20	S2
10854-15	3	SL018620	Beta-1,3-galactosyl-O-glycosyl-glycoprotein beta-1,6-N-acetylglucosaminyltransferase 4	GCNT4	Q9P109	51301	GCNT4	Human	RFU	Protein	20	S1
10866-60	3	SL018833	Serine/threonine-protein phosphatase 4 regulatory subunit 3A	P4R3A	Q6IN85	55671	PPP4R3A	Human	RFU	Protein	20	S2
10870-32	3	SL025990	Spastin:Microtubule interacting and trafficking domain	Spastin:MIT	Q9UBP0	6683	SPAST	Human	RFU	Protein	20	S2
10876-300	3	SL018839	BRCA1-associated ATM activator 1	BRAT1	Q6PJG6	221927	BRAT1	Human	RFU	Protein	20	S1
10880-38	3	SL018034	Protein FAM163B	F163B	P0C2L3	642968	FAM163B	Human	RFU	Protein	20	S2
10882-12	3	SL005718	Desmocollin-1	Desmocollin-1	Q08554	1823	DSC1	Human	RFU	Protein	20	S1
10885-36	3	SL016472	Bombesin receptor-activated protein C6orf89	CF089	Q6UWU4	221477	C6orf89	Human	RFU	Protein	20	S2
10889-2	3	SL017998	Melanocortin-2 receptor accessory protein 2	MRAP2	Q96G30	112609	MRAP2	Human	RFU	Protein	20	S2
10890-135	3	SL018026	Lactase-like protein	LCTL	Q6UWM7	197021	LCTL	Human	RFU	Protein	20	S1
10892-8	3	SL007619	Oncostatin-M-specific receptor subunit beta	OSMR	Q99650	9180	OSMR	Human	RFU	Protein	20	S1
10894-25	3	SL005696	Secretagogin	Secretagogin	O76038	10590	SCGN	Human	RFU	Protein	20	S1
10895-28	3	SL017961	Transmembrane protease serine 11B	TM11B	Q86T26	132724	TMPRSS11B	Human	RFU	Protein	20	S1
10900-272	3	SL013230	Stathmin-2	STMN2	Q93045	11075	STMN2	Human	RFU	Protein	20	S2
10903-50	3	SL017987	Syntaxin-8	STX8	Q9UNK0	9482	STX8	Human	RFU	Protein	20	S2
10907-116	3	SL009074	Neurotrimin	NTRI	Q9P121	50863	NTM	Human	RFU	Protein	20	S2
10908-2	3	SL017992	Polypeptide N-acetylgalactosaminyltransferase 13	GLT13	Q8IUC8	114805	GALNT13	Human	RFU	Protein	20	S2
10910-6	3	SL018022	Carcinoembryonic antigen-related cell adhesion molecule 4	CEAM4	O75871	1089	CEACAM4	Human	RFU	Protein	20	S2
10916-44	3	SL013523	Secretory phospholipase A2 receptor	PLA2R	Q13018	22925	PLA2R1	Human	RFU	Protein	20	S2
10917-40	3	SL006983	Guanine nucleotide-binding protein G(I)/G(S)/G(O) subunit gamma-T2	GBGT2	O14610	2793	GNGT2	Human	RFU	Protein	20	S1
10924-258	3	SL018077	Neuferricin	NEUFC	Q8WUJ1	124936	CYB5D2	Human	RFU	Protein	20	S1
10933-107	3	SL018094	Calcium-binding protein 8	CABP8	Q9BXU9	83698	CALN1	Human	RFU	Protein	20	S1
10938-13	3	SL003442	Lymphocyte function-associated antigen 3	sLFA-3	P19256	965	CD58	Human	RFU	Protein	20	S2
10939-16	3	SL018105	Pleckstrin homology domain-containing family A member 4	PKHA4	Q9H4M7	57664	PLEKHA4	Human	RFU	Protein	20	S1
10940-25	3	SL008242	Sarcalumenin	SRCA	Q86TD4	6345	SRL	Human	RFU	Protein	20	S2
10945-11	3	SL006065	Syntaxin-6	Syntaxin-6	O43752	10228	STX6	Human	RFU	Protein	20	S2
10948-14	3	SL008958	Phospholipase D3	PLD3	Q8IV08	23646	PLD3	Human	RFU	Protein	20	S2
10949-59	3	SL008009	60S acidic ribosomal protein P2	RLA2	P05387	6181	RPLP2	Human	RFU	Protein	20	S1
10953-14	3	SL018252	C-type lectin domain family 2 member A	CLC2A	Q6UVW9	387836	CLEC2A	Human	RFU	Protein	20	S1
10955-4	3	SL014095	C-type lectin domain family 10 member A	CLC10	Q8IUN9	10462	CLEC10A	Human	RFU	Protein	20	S1
10956-82	3	SL009212	Glycine cleavage system H protein, mitochondrial	GCSH	P23434	2653	GCSH	Human	RFU	Protein	20	S2
10959-125	3	SL005478	BET1-like protein	BET1L	Q9NYM9	51272	BET1L	Human	RFU	Protein	20	S1
10961-15	3	SL015329	Retinoic acid receptor responder protein 3	TIG3	Q9UL19	5920	PLAAT4	Human	RFU	Protein	20	S1
10966-1	3	SL000251	Alpha-2-HS-glycoprotein	a2-HS-Glycoprotein	P02765	197	AHSG	Human	RFU	Protein	20	S2
10967-12	3	SL000546	Prolactin	PRL	P01236	5617	PRL	Human	RFU	Protein	20	S2
10970-3	3	SL018330	Ecto-ADP-ribosyltransferase 3	NAR3	Q13508	419	ART3	Human	RFU	Protein	20	S2
10974-20	3	SL012454	Serine protease inhibitor Kazal-type 7	ISK7	P58062	84651	SPINK7	Human	RFU	Protein	20	S2
10975-59	3	SL008738	Mucin-like protein 1	MUCL1	Q96DR8	118430	MUCL1	Human	RFU	Protein	20	S1
10976-44	3	SL025935	Mucin-1:region 3	MUC1:region 3	P15941	4582	MUC1	Human	RFU	Protein	20	S1
10977-55	3	SL017252	Unique cartilage matrix-associated protein	UCMA	Q8WVF2	221044	UCMA	Human	RFU	Protein	20	S2
10978-39	3	SL009327	Growth hormone variant	SOM2	P01242	2689	GH2	Human	RFU	Protein	20	S1
10980-11	3	SL007155	Acetylcholinesterase	ACES	P22303	43	ACHE	Human	RFU	Protein	20	S2
10981-56	3	SL013799	Pro-neuregulin-3, membrane-bound isoform	NRG3	P56975	10718	NRG3	Human	RFU	Protein	20	S2
10990-21	3	SL017128	Leucine-rich repeat serine/threonine-protein kinase 2	LRRK2	Q5S007	120892	LRRK2	Human	RFU	Protein	20	S2
11067-13	3	SL001791	Osteocalcin	Osteocalcin	P02818	632	BGLAP	Human	RFU	Protein	20	S2
11071-1	3	SL000481	Interleukin-5	IL-5	P05113	3567	IL5	Human	RFU	Protein	20	S1
11081-1	3	SL007151	Glycerol-3-phosphate dehydrogenase [NAD(+)], cytoplasmic	GPDA	P21695	2819	GPD1	Human	RFU	Protein	20	S2
11083-23	3	SL001731	Gamma-enolase	NSE	P09104	2026	ENO2	Human	RFU	Protein	20	S2
11089-7	3	SL000459	Immunoglobulin A	IgA	P01876|P01877	3493 3494	IGHA1|IGHA2	Human	RFU	Protein	20	S2
11094-104	3	SL007361	Galectin-10	LPPL	Q05315	1178	CLC	Human	RFU	Protein	20	S1
11096-57	3	SL018921	HemK methyltransferase family member 2	HEMK2	Q9Y5N5	29104	N6AMT1	Human	RFU	Protein	20	S2
11098-1	3	SL007953	Pyridoxal kinase	PDXK	O00764	8566	PDXK	Human	RFU	Protein	20	S2
11101-18	3	SL004489	Toll-like receptor 4	TLR4	O00206	7099	TLR4	Human	RFU	Protein	20	S1
11102-22	3	SL012561	Regenerating islet-derived protein 4	REG4	Q9BYZ8	83998	REG4	Human	RFU	Protein	20	S2
11103-24	3	SL000448	Heat shock protein beta-1	HSP 27	P04792	3315	HSPB1	Human	RFU	Protein	20	S2
11104-13	3	SL003340	Chitinase-3-like protein 1	YKL-40	P36222	1116	CHI3L1	Human	RFU	Protein	20	S3
11105-171	3	SL003650	Alpha-enolase	Alpha enolase	P06733	2023	ENO1	Human	RFU	Protein	20	S2
11107-25	3	SL007735	Teneurin-3	TEN3	Q9P273	55714	TENM3	Human	RFU	Protein	20	S1
11109-56	3	SL025995	Sushi, von Willebrand factor type A, EGF and pentraxin domain-containing protein 1:Sushi 15-18	SVEP1:Sushi 15-18	Q4LDE5	79987	SVEP1	Human	RFU	Protein	20	S2
11110-4	3	SL019320	Transmembrane protein 119	TM119	Q4V9L6	338773	TMEM119	Human	RFU	Protein	20	S1
11112-18	3	SL016490	Protein kish-A	KISHA	Q8TBQ9	153339	TMEM167A	Human	RFU	Protein	20	S1
11116-16	3	SL018991	Uncharacterized protein C11orf87	CK087	Q6NUJ2	399947	C11orf87	Human	RFU	Protein	20	S2
11117-2	3	SL009460	Spermatogenesis-associated protein 20	SPT20	Q8TB22	64847	SPATA20	Human	RFU	Protein	20	S2
11118-107	3	SL019321	Ras-related protein Rab-17	RAB17	Q9H0T7	64284	RAB17	Human	RFU	Protein	20	S1
11120-49	3	SL019329	N-acetyltransferase 14	NAT14	Q8WUY8	57106	NAT14	Human	RFU	Protein	20	S2
11121-56	3	SL012520	Brorin	VWC2	Q2TAL6	375567	VWC2	Human	RFU	Protein	20	S2
11122-97	3	SL019337	Maspardin	SPG21	Q9NZD8	51324	SPG21	Human	RFU	Protein	20	S1
11126-102	3	SL007986	Triple functional domain protein	TRIO	O75962	7204	TRIO	Human	RFU	Protein	20	S1
11128-29	3	SL026000	Transmembrane protein 132C:Cytoplasmic domain	T132C:CD	Q8N3T6	92293	TMEM132C	Human	RFU	Protein	20	S1
11129-66	3	SL007065	Bone morphogenetic protein 15	BMP15	O95972	9210	BMP15	Human	RFU	Protein	20	S2
11130-158	3	SL019338	Voltage-dependent L-type calcium channel subunit beta-4	CACB4	O00305	785	CACNB4	Human	RFU	Protein	20	S1
11134-30	3	SL019322	Peptide chain release factor 1-like, mitochondrial	RF1ML	Q9UGC7	54516	MTRF1L	Human	RFU	Protein	20	S1
11135-5	3	SL012643	39S ribosomal protein L55, mitochondrial	RM55	Q7Z7F7	128308	MRPL55	Human	RFU	Protein	20	S1
11137-43	3	SL025889	Cytokine receptor common subunit beta:Cytoplasmic domain	IL3RB:CD	P32927	1439	CSF2RB	Human	RFU	Protein	20	S1
11138-16	3	SL006056	Runt-related transcription factor 3	RUNX3	Q13761	864	RUNX3	Human	RFU	Protein	20	S2
11140-56	3	SL025819	Collagen alpha-1(I) chain:C-term propeptide	CO1A1:C-term propeptide	P02452	1277	COL1A1	Human	RFU	Protein	20	S2
11142-11	3	SL025792	Angiopoietin-related protein 1:C-Term, Fibrinogen domian	ANGL1:C-term	O95841	9068	ANGPTL1	Human	RFU	Protein	20	S2
11143-32	3	SL025949	Noelin-3:Isoform 2, N-term	NOE3:N-term	Q96PB7	118427	OLFM3	Human	RFU	Protein	20	S1
11144-10	3	SL012527	Beta-defensin 116	DB116	Q30KQ4	245930	DEFB116	Human	RFU	Protein	20	S1
11145-72	3	SL019333	UPF0606 protein KIAA1549L	K154L	Q6ZVL6	25758	KIAA1549L	Human	RFU	Protein	20	S2
11146-4	3	SL019339	T-box transcription factor TBX22	TBX22	Q9Y458	50945	TBX22	Human	RFU	Protein	20	S1
11147-17	3	SL026020	Trem-like transcript 1 protein:immunoreceptor tyrosine-based inhibition motif	TRML1:ITIM	Q86YW5	340205	TREML1	Human	RFU	Protein	20	S1
11149-3	3	SL026003	Toll-like receptor 1:Cytoplasmic domain	TLR1:CD	Q15399	7096	TLR1	Human	RFU	Protein	20	S1
11150-3	3	SL002657	Collagen alpha-1(VI) chain	Collagen a1(VI)	P12109	1291	COL6A1	Human	RFU	Protein	20	S2
11152-46	3	SL003918	Kallikrein-13	kallikrein 13	Q9UKR3	26085	KLK13	Human	RFU	Protein	20	S2
11154-3	3	SL007421	Nuclear factor erythroid 2-related factor 1	NF2L1	Q14494	4779	NFE2L1	Human	RFU	Protein	20	S2
11155-16	3	SL019315	Collagen alpha-5(VI) chain	CO6A5	A8TX70	256076	COL6A5	Human	RFU	Protein	20	S1
11158-40	3	SL019326	Bicaudal D-related protein 1	BICR1	Q6ZP65	92558	BICDL1	Human	RFU	Protein	20	S1
11159-14	3	SL025937	Mitochondrial ubiquitin ligase activator of NFKB 1:Cytoplasmic domain	MUL1:CD	Q969V5	79594	MUL1	Human	RFU	Protein	20	S1
11160-56	3	SL019335	RING finger protein 122	RN122	Q9H9V4	79845	RNF122	Human	RFU	Protein	20	S2
11161-5	3	SL019340	Spartin	SPG20	Q8N0X7	23111	SPART	Human	RFU	Protein	20	S1
11162-37	3	SL019313	Equatorin	EQTN	Q9NQ60	54586	EQTN	Human	RFU	Protein	20	S1
11163-7	3	SL019316	Protein FAM162B	F162B	Q5T6X4	221303	FAM162B	Human	RFU	Protein	20	S1
11164-7	3	SL019319	Teneurin-2	TEN2	Q9NT68	57451	TENM2	Human	RFU	Protein	20	S1
11167-6	3	SL019330	Myotubularin-related protein 1	MTMR1	Q13613	8776	MTMR1	Human	RFU	Protein	20	S1
11168-3	3	SL019053	Multiple epidermal growth factor-like domains protein 10	MEG10	Q96KG7	84466	MEGF10	Human	RFU	Protein	20	S1
11173-29	3	SL019119	Allergin-1	MILR1	Q7Z6M3	284021	MILR1	Human	RFU	Protein	20	S1
11174-8	3	SL026002	Thrombospondin type-1 domain-containing protein 7A:Thrombospondin type-1 domain 6	THS7A:TSP type-1 domain 6	Q9UPZ6	221981	THSD7A	Human	RFU	Protein	20	S2
11175-45	3	SL018606	Lysophosphatidylcholine acyltransferase 2	PCAT2	Q7L5N7	54947	LPCAT2	Human	RFU	Protein	20	S1
11177-16	3	SL006465	Keratin, type II cytoskeletal 5	K2C5	P13647	3852	KRT5	Human	RFU	Protein	20	S2
11178-21	3	SL025996	Sushi, von Willebrand factor type A, EGF and pentraxin domain-containing protein 1:EGF-like domains 4-6	SVEP1:EGF-like domains 4-6	Q4LDE5	79987	SVEP1	Human	RFU	Protein	20	S2
11179-7	3	SL006717	Testis-specific serine/threonine-protein kinase 1	TSSK1	Q9BXA7	83942	TSSK1B	Human	RFU	Protein	20	S2
11180-17	3	SL019318	SWI/SNF complex subunit SMARCC1	SMRC1	Q92922	6599	SMARCC1	Human	RFU	Protein	20	S1
11184-51	3	SL002762	Chromogranin-A	CgA	P10645	1113	CHGA	Human	RFU	Protein	20	S2
11185-145	3	SL019341	GTP cyclohydrolase 1	GCH1	P30793	2643	GCH1	Human	RFU	Protein	20	S1
11186-12	3	SL019314	Transmembrane protein 52	TMM52	Q8NDY8	339456	TMEM52	Human	RFU	Protein	20	S1
11187-11	3	SL018579	C-type lectin domain family 12 member A	CL12A	Q5QGZ9	160364	CLEC12A	Human	RFU	Protein	20	S2
11190-129	3	SL019328	ATP-dependent zinc metalloprotease YME1L1	YMEL1	Q96TA2	10730	YME1L1	Human	RFU	Protein	20	S1
11192-168	3	SL008302	Tubulointerstitial nephritis antigen-like	TINAL	Q9GZM7	64129	TINAGL1	Human	RFU	Protein	20	S2
11193-27	3	SL019342	Hepatocyte nuclear factor 1-alpha	HNF1A	P20823	6927	HNF1A	Human	RFU	Protein	20	S1
11194-6	3	SL007783	Signaling threshold-regulating transmembrane adapter 1	SIT1	Q9Y3P8	27240	SIT1	Human	RFU	Protein	20	S1
11196-31	3	SL025822	Collagen alpha-3(VI) chain:Bovine pancreatic trypsin inhibitor/Kunitz inhibitor domain, isoform 1	Collagen alpha-3(VI):BPTI/Kunitz inhibitor	P12111	1293	COL6A3	Human	RFU	Protein	20	S2
11198-37	3	SL012768	Cyclic AMP-responsive element-binding protein 3-like protein 1	CR3L1	Q96BA8	90993	CREB3L1	Human	RFU	Protein	20	S1
11200-52	3	SL007696	Complement component C1q receptor	C1QR1	Q9NPY3	22918	CD93	Human	RFU	Protein	20	S2
11201-19	3	SL019343	tRNA pseudouridine synthase A, mitochondrial	TRUA	Q9Y606	80324	PUS1	Human	RFU	Protein	20	S1
11202-70	3	SL019350	T-box transcription factor TBX5	TBX5	Q99593	6910	TBX5	Human	RFU	Protein	20	S1
11203-97	3	SL009203	Pyruvate kinase PKLR	KPYR	P30613	5313	PKLR	Human	RFU	Protein	20	S2
11204-80	3	SL009892	Coxsackievirus and adenovirus receptor	CXAR	P78310	1525	CXADR	Human	RFU	Protein	20	S2
11205-10	3	SL004571	Integrin beta-7	Integrin beta-7	P26010	3695	ITGB7	Human	RFU	Protein	20	S2
11207-3	3	SL025927	Macrophage scavenger receptor types I and II:Cytoplasmic domain	Macrophage scavenger receptor:CD	P21757	4481	MSR1	Human	RFU	Protein	20	S1
11208-15	3	SL019369	N-acetylglucosamine-1-phosphodiester alpha-N-acetylglucosaminidase	NAGPA	Q9UK23	51172	NAGPA	Human	RFU	Protein	20	S2
11211-7	3	SL019355	Tubulin-specific chaperone E	TBCE	Q15813	6905	TBCE	Human	RFU	Protein	20	S2
11212-7	3	SL008805	Thioredoxin domain-containing protein 5	TXND5	Q8NBS9	81567	TXNDC5	Human	RFU	Protein	20	S2
11214-40	3	SL019363	DnaJ homolog subfamily B member 9	DNJB9	Q9UBS3	4189	DNAJB9	Human	RFU	Protein	20	S2
11215-6	3	SL025808	Cadherin-15:Cytoplasmic domain	CAD15:CD	P55291	1013	CDH15	Human	RFU	Protein	20	S2
11217-16	3	SL007405	C-terminal-binding protein 1	CTBP1	Q13363	1487	CTBP1	Human	RFU	Protein	20	S1
11218-84	3	SL019351	Thiopurine S-methyltransferase	TPMT	P51580	7172	TPMT	Human	RFU	Protein	20	S2
11219-95	3	SL012727	Fibroblast growth factor-binding protein 3	FGFP3	Q8TAT2	143282	FGFBP3	Human	RFU	Protein	20	S2
11220-53	3	SL019359	Uncharacterized protein C10orf105	CJ105	Q8TEF2	414152	C10orf105	Human	RFU	Protein	20	S1
11223-1	3	SL018407	Transmembrane protein 154	TM154	Q6P9G4	201799	TMEM154	Human	RFU	Protein	20	S1
11226-16	3	SL019352	Ubiquitin-protein ligase E3A	UBE3A	Q05086	7337	UBE3A	Human	RFU	Protein	20	S1
11227-31	3	SL019356	Transducin beta-like protein 2	TBL2	Q9Y4P3	26608	TBL2	Human	RFU	Protein	20	S1
11228-37	3	SL018079	Protein RIC-3	RIC3	Q7Z5B4	79608	RIC3	Human	RFU	Protein	20	S1
11229-16	3	SL007036	Serine/threonine-protein kinase/endoribonuclease IRE1	ERN1	O75460	2081	ERN1	Human	RFU	Protein	20	S1
11231-12	3	SL019364	Adrenodoxin-like protein, mitochondrial	ADXL	Q6P4F2	112812	FDX2	Human	RFU	Protein	20	S1
11232-46	3	SL003164	Transcobalamin-1	Holo-TC I	P20061	6947	TCN1	Human	RFU	Protein	20	S2
11237-49	3	SL006539	Procollagen C-endopeptidase enhancer 1	PCOC1	Q15113	5118	PCOLCE	Human	RFU	Protein	20	S3
11239-49	3	SL019365	Transmembrane protease serine 6	TMPS6	Q8IU80	164656	TMPRSS6	Human	RFU	Protein	20	S2
11241-8	3	SL011173	Argininosuccinate lyase	ARLY	P04424	435	ASL	Human	RFU	Protein	20	S2
11242-33	3	SL019353	Protein-glutamine gamma-glutamyltransferase K	TGM1	P22735	7051	TGM1	Human	RFU	Protein	20	S1
11243-90	3	SL019357	Adhesion G-protein coupled receptor F1	GPR110	Q5T601	266977	ADGRF1	Human	RFU	Protein	20	S2
11245-43	3	SL025863	Filamin-A:Calponin Homology 1	filamin A:CH1	P21333	2316	FLNA	Human	RFU	Protein	20	S2
11246-3	3	SL012736	BPI fold-containing family B member 1	LPLC1	Q8TDL5	92747	BPIFB1	Human	RFU	Protein	20	S2
11247-20	3	SL019366	N-acetylglutamate synthase, mitochondrial	NAGS	Q8N159	162417	NAGS	Human	RFU	Protein	20	S1
11248-43	3	SL019345	Uroporphyrinogen-III synthase	HEM4	P10746	7390	UROS	Human	RFU	Protein	20	S1
11252-30	3	SL025921	Leucine-rich repeat and calponin homology domain-containing protein 4:Calponin Homology	LRCH4:CH	O75427	4034	LRCH4	Human	RFU	Protein	20	S1
11254-13	3	SL012393	Papilin	PPN	O95428	89932	PAPLN	Human	RFU	Protein	20	S1
11257-1	3	SL007095	Dihydropteridine reductase	DHPR	P09417	5860	QDPR	Human	RFU	Protein	20	S2
11258-41	3	SL004569	Mucosal addressin cell adhesion molecule 1	MAdCAM-1	Q13477	8174	MADCAM1	Human	RFU	Protein	20	S2
11260-47	3	SL012729	SUN domain-containing protein 5	SPA4L	Q8TC36	140732	SUN5	Human	RFU	Protein	20	S1
11262-39	3	SL019367	TraB domain-containing protein	TRABD	Q9H4I3	80305	TRABD	Human	RFU	Protein	20	S1
11263-57	3	SL019372	Calsequestrin-1	CASQ1	P31415	844	CASQ1	Human	RFU	Protein	20	S2
11264-33	3	SL019346	Xanthine dehydrogenase/oxidase	XDH	P47989	7498	XDH	Human	RFU	Protein	20	S1
11265-8	3	SL005674	Retinal dehydrogenase 1	Retinal dehydrogenase 1	P00352	216	ALDH1A1	Human	RFU	Protein	20	S2
11266-8	3	SL025980	P-selectin glycoprotein ligand 1:Extracellular domain	SELPL:ECD	Q14242	6404	SELPLG	Human	RFU	Protein	20	S1
11270-17	3	SL019368	Coiled-coil-helix-coiled-coil-helix domain-containing protein 10, mitochondrial	CHC10	Q8WYQ3	400916	CHCHD10	Human	RFU	Protein	20	S2
11273-176	3	SL013030	Glutathione S-transferase theta-2B	GSTT2	P0CG30	653689	GSTT2B	Human	RFU	Protein	20	S1
11275-94	3	SL013872	Low-density lipoprotein receptor-related protein 1B	LRP1B	Q9NZR2	53353	LRP1B	Human	RFU	Protein	20	S2
11277-23	3	SL014732	Cyclic AMP-dependent transcription factor ATF-6 alpha	ATF6A	P18850	22926	ATF6	Human	RFU	Protein	20	S2
11278-4	3	SL009488	Collagen alpha-2(XI) chain	COL11A2	P13942	1302	COL11A2	Human	RFU	Protein	20	S2
11279-42	3	SL019373	Gamma-aminobutyric acid type B receptor subunit 1	GABR1	Q9UBS5	2550	GABBR1	Human	RFU	Protein	20	S1
11280-6	3	SL019348	Glutamate decarboxylase 1	DCE1	Q99259	2571	GAD1	Human	RFU	Protein	20	S1
11281-6	3	SL002520	Growth factor receptor-bound protein 7	GRB7	Q14451	2886	GRB7	Human	RFU	Protein	20	S1
11282-16	3	SL025926	Macrophage scavenger receptor types I and II:Extracellular domain	Macrophage scavenger receptor:ECD	P21757	4481	MSR1	Human	RFU	Protein	20	S1
11283-13	3	SL019361	DDB1- and CUL4-associated factor 5	DCAF5	Q96JK2	8816	DCAF5	Human	RFU	Protein	20	S1
11284-24	3	SL005432	Leukocyte-associated immunoglobulin-like receptor 1	LAIR1	Q6GTX8	3903	LAIR1	Human	RFU	Protein	20	S1
11285-8	3	SL004572	Hematopoietic progenitor cell antigen CD34	CD34	P28906	947	CD34	Human	RFU	Protein	20	S1
11286-78	3	SL007632	Selenoprotein S	SELS	Q9BQE4	55829	SELENOS	Human	RFU	Protein	20	S2
11287-14	3	SL005251	Cytochrome b5	Cytochrome b5	P00167	1528	CYB5A	Human	RFU	Protein	20	S1
11288-26	3	SL019349	Cytosolic purine 5'-nucleotidase	5NTC	P49902	22978	NT5C2	Human	RFU	Protein	20	S2
11289-31	3	SL019354	Casein kinase I isoform delta	KC1D	P48730	1453	CSNK1D	Human	RFU	Protein	20	S1
11292-13	3	SL025978	Scavenger receptor class A member 3:region 2	SCAR3:region 2	Q6AZY7	51435	SCARA3	Human	RFU	Protein	20	S1
11293-14	3	SL025922	Leucine-rich repeat neuronal protein 1:Cytoplasmic domain	LRRN1:CD	Q6UXK5	57633	LRRN1	Human	RFU	Protein	20	S1
11294-7	3	SL026006	Transmembrane and coiled-coil domains protein 3:region 2	TMCC3:region 2	Q9ULS5	57458	TMCC3	Human	RFU	Protein	20	S2
11297-54	3	SL007356	Neurogenic locus notch homolog protein 2	NOTC2	Q04721	4853	NOTCH2	Human	RFU	Protein	20	S1
11300-32	3	SL008851	Sortilin	SORT	Q99523	6272	SORT1	Human	RFU	Protein	20	S1
11302-237	3	SL008783	Tenascin-R	TENR	Q92752	7143	TNR	Human	RFU	Protein	20	S2
11303-7	3	SL008335	Deoxynucleoside triphosphate triphosphohydrolase SAMHD1	SAMH1	Q9Y3Z3	25939	SAMHD1	Human	RFU	Protein	20	S1
11307-33	3	SL007655	NEDD4-like E3 ubiquitin-protein ligase WWP1	WWP1	Q9H0M0	11059	WWP1	Human	RFU	Protein	20	S1
11308-8	3	SL019414	Cyclic AMP-responsive element-binding protein 3-like protein 4	CR3L4	Q8TEY5	148327	CREB3L4	Human	RFU	Protein	20	S2
11310-8	3	SL004969	Desmoglein-3	Desmoglein-3	P32926	1830	DSG3	Human	RFU	Protein	20	S2
11311-79	3	SL004573	V(D)J recombination-activating protein 1	RAG-1	P15918	5896	RAG1	Human	RFU	Protein	20	S1
11312-40	3	SL019432	Mismatch repair endonuclease PMS2	PMS2	P54278	5395	PMS2	Human	RFU	Protein	20	S1
11313-100	3	SL008857	Pterin-4-alpha-carbinolamine dehydratase	PHS	P61457	5092	PCBD1	Human	RFU	Protein	20	S2
11315-148	3	SL013714	Protein phosphatase 1D	PPM1D	O15297	8493	PPM1D	Human	RFU	Protein	20	S1
11318-20	3	SL004840	Apolipoprotein A-V	Apo A-V	Q6Q788	116519	APOA5	Human	RFU	Protein	20	S2
11319-106	3	SL013791	Double-strand break repair protein MRE11	MRE11	P49959	4361	MRE11	Human	RFU	Protein	20	S1
11320-29	3	SL013858	E3 ubiquitin-protein ligase CHFR	CHFR	Q96EP1	55743	CHFR	Human	RFU	Protein	20	S2
11324-3	3	SL006952	Peroxidasin-like protein	PXDNL	A1KZ92	137902	PXDNL	Human	RFU	Protein	20	S1
11325-8	3	SL007329	Protein BTG2	BTG2	P78543	7832	BTG2	Human	RFU	Protein	20	S1
11328-9	3	SL019433	U6 snRNA phosphodiesterase	USB1	Q9BQ65	79650	USB1	Human	RFU	Protein	20	S1
11330-15	3	SL013806	Casein kinase II subunit beta	CSK2B	P67870	1460	CSNK2B	Human	RFU	Protein	20	S2
11333-82	3	SL006485	Rho GTPase-activating protein 25	RHG25	P42331	9938	ARHGAP25	Human	RFU	Protein	20	S2
11334-7	3	SL019428	Leukocyte immunoglobulin-like receptor subfamily B member 3	LIRB3	O75022	102725035	LILRB3	Human	RFU	Protein	20	S2
11336-9	3	SL019434	Fanconi anemia group F protein	FANCF	Q9NPI8	2188	FANCF	Human	RFU	Protein	20	S1
11338-49	3	SL013793	Tyrosine-protein kinase BLK	BLK	P51451	640	BLK	Human	RFU	Protein	20	S1
11342-59	3	SL025966	Plexin domain-containing protein 2:Cytoplasmic domain	PXDC2:CD	Q6UX71	84898	PLXDC2	Human	RFU	Protein	20	S1
11348-132	3	SL012364	Prolyl 4-hydroxylase subunit alpha-2	P4HA2	O15460	8974	P4HA2	Human	RFU	Protein	20	S1
11350-30	3	SL019100	E3 ubiquitin-protein ligase CHIP	CHIP	Q9UNE7	10273	STUB1	Human	RFU	Protein	20	S1
11351-233	3	SL019435	Non-homologous end-joining factor 1	NHEJ1	Q9H9Q4	79840	NHEJ1	Human	RFU	Protein	20	S1
11352-42	3	SL006679	Titin	TITIN	Q8WZ42	7273	TTN	Human	RFU	Protein	20	S1
11353-143	3	SL004101	Mothers against decapentaplegic homolog 2	SMAD2	Q15796	4087	SMAD2	Human	RFU	Protein	20	S1
11354-21	3	SL006829	1-phosphatidylinositol 4,5-bisphosphate phosphodiesterase beta-1	Phospholipase C-beta-1	Q9NQ66	23236	PLCB1	Human	RFU	Protein	20	S2
11355-10	3	SL008435	Eukaryotic translation initiation factor 5A-2	IF5A2	Q9GZV4	56648	EIF5A2	Human	RFU	Protein	20	S2
11356-19	3	SL019423	Protein DGCR14	DGC14	Q96DF8	8220	ESS2	Human	RFU	Protein	20	S2
11358-15	3	SL013823	Growth factor receptor-bound protein 10	GRB10	Q13322	2887	GRB10	Human	RFU	Protein	20	S1
11360-39	3	SL009588	Ribonucleoside-diphosphate reductase large subunit	RRM1	P23921	6240	RRM1	Human	RFU	Protein	20	S2
11361-73	3	SL000155	Thymidine phosphorylase	TP	P19971	1890	TYMP	Human	RFU	Protein	20	S2
11363-58	3	SL019418	Aquaporin-4	AQP4	P55087	361	AQP4	Human	RFU	Protein	20	S1
11364-18	3	SL019424	Mitofusin-1	MFN1	Q8IWA4	55669	MFN1	Human	RFU	Protein	20	S2
11365-17	3	SL009091	Teneurin-4	TEN4	Q6N022	26011	TENM4	Human	RFU	Protein	20	S1
11368-32	3	SL008133	Adenylate kinase 2, mitochondrial	KAD2	P54819	204	AK2	Human	RFU	Protein	20	S2
11369-23	3	SL008855	Alcohol dehydrogenase class-3	ADHX	P11766	128	ADH5	Human	RFU	Protein	20	S2
11370-20	3	SL019445	72 kDa inositol polyphosphate 5-phosphatase	INP5E	Q9NRR6	56623	INPP5E	Human	RFU	Protein	20	S1
11371-1	3	SL019419	Probable G-protein coupled receptor 101	GP101	Q96P66	83550	GPR101	Human	RFU	Protein	20	S1
11372-2	3	SL019425	Zinc finger protein 18	ZNF18	P17022	7566	ZNF18	Human	RFU	Protein	20	S2
11375-49	3	SL019436	Forkhead box protein L2	FOXL2	P58012	668	FOXL2	Human	RFU	Protein	20	S1
11377-19	3	SL019442	Alcohol dehydrogenase class 4 mu/sigma chain	ADH7	P40394	131	ADH7	Human	RFU	Protein	20	S1
11378-37	3	SL025913	Tyrosine-protein kinase SYK:Src Homology domain	KSYK:SH2, 1 and 2	P43405	6850	SYK	Human	RFU	Protein	20	S2
11380-84	3	SL019426	RNA-binding protein 24	RBM24	Q9BX46	221662	RBM24	Human	RFU	Protein	20	S1
11381-56	3	SL010934	Ribose-phosphate pyrophosphokinase 1	PRPS1	P60891	5631	PRPS1	Human	RFU	Protein	20	S1
11382-5	3	SL006491	Biliverdin reductase A	BIEA	P53004	644	BLVRA	Human	RFU	Protein	20	S2
11383-41	3	SL001732	Keratin, type II cytoskeletal 7	Keratin 7	P08729	3855	KRT7	Human	RFU	Protein	20	S2
11387-3	3	SL019420	Cyclic AMP-dependent transcription factor ATF-6 beta	ATF6B	Q99941	1388	ATF6B	Human	RFU	Protein	20	S2
11388-75	3	SL001690	WAP four-disulfide core domain protein 2	HE4	Q14508	10406	WFDC2	Human	RFU	Protein	20	S3
11390-24	3	SL004870	Carbonic anhydrase-related protein	Carbonic Anhydrase VIII	P35219	767	CA8	Human	RFU	Protein	20	S1
11391-69	3	SL015949	Mevalonate kinase	MVK	Q03426	4598	MVK	Human	RFU	Protein	20	S2
11395-5	3	SL025855	Protein-tyrosine kinase 2-beta:4.1 protein, ezrin, radixin, moesin domain	FAK2:FERM	Q14289	2185	PTK2B	Human	RFU	Protein	20	S2
11396-39	3	SL019451	Dynein intermediate chain 1, axonemal	DNAI1	Q9UI46	27019	DNAI1	Human	RFU	Protein	20	S1
11401-181	3	SL019468	E3 ubiquitin-protein ligase RNF146	RN146	Q9NTX7	81847	RNF146	Human	RFU	Protein	20	S1
11402-17	3	SL019475	Histone-lysine N-methyltransferase 2C	KMT2C	Q8NEZ4	58508	KMT2C	Human	RFU	Protein	20	S1
11405-150	3	SL007659	Caspase recruitment domain-containing protein 9	CARD9	Q9H257	64170	CARD9	Human	RFU	Protein	20	S2
11406-82	3	SL019452	Isobutyryl-CoA dehydrogenase, mitochondrial	ACAD8	Q9UKU7	27034	ACAD8	Human	RFU	Protein	20	S1
11407-57	3	SL015269	Phospholipid scramblase 3	PLS3	Q9NRY6	57048	PLSCR3	Human	RFU	Protein	20	S1
11416-23	3	SL025857	F-box/LRR-repeat protein 4:Leucine-rich repeats 4 and 5	FBXL4:LRR4 and LRR5	Q9UKA2	26235	FBXL4	Human	RFU	Protein	20	S2
11421-10	3	SL008304	EH domain-containing protein 4	EHD4	Q9H223	30844	EHD4	Human	RFU	Protein	20	S2
11422-2	3	SL019446	Homeobox protein DLX-3	DLX3	O60479	1747	DLX3	Human	RFU	Protein	20	S1
11424-4	3	SL008049	Fumarylacetoacetase	FAAA	P16930	2184	FAH	Human	RFU	Protein	20	S2
11425-31	3	SL019064	RUN and FYVE domain-containing protein 1	RUFY1	Q96T51	80230	RUFY1	Human	RFU	Protein	20	S2
11428-31	3	SL006955	PDZ and LIM domain protein 1	PDLI1	O00151	9124	PDLIM1	Human	RFU	Protein	20	S1
11429-80	3	SL004923	Heterogeneous nuclear ribonucleoproteins C1/C2	hnRNP C1/C2	P07910	3183	HNRNPC	Human	RFU	Protein	20	S1
11430-49	3	SL007518	E3 ubiquitin-protein ligase DTX1	DTX1	Q86Y01	1840	DTX1	Human	RFU	Protein	20	S1
11431-235	3	SL019447	ATP-dependent DNA helicase Q1	RECQ1	P46063	5965	RECQL	Human	RFU	Protein	20	S2
11432-11	3	SL019453	Polyglutamine-binding protein 1	PQBP1	O60828	10084	PQBP1	Human	RFU	Protein	20	S1
11433-11	3	SL019456	Tectonic-2	TECT2	Q96GX1	79867	TCTN2	Human	RFU	Protein	20	S1
11436-6	3	SL008211	Alpha-internexin	AINX	Q16352	9118	INA	Human	RFU	Protein	20	S2
11438-6	3	SL019476	DnaJ homolog subfamily B member 2	DNJB2	P25686	3300	DNAJB2	Human	RFU	Protein	20	S2
11439-88	3	SL019482	Rhophilin-2	RHPN2	Q8IUC4	85415	RHPN2	Human	RFU	Protein	20	S1
11440-58	3	SL004268	Suppressor of cytokine signaling 3	SOCS-3	O14543	9021	SOCS3	Human	RFU	Protein	20	S2
11441-11	3	SL007082	Glycogen phosphorylase, liver form	PYGL	P06737	5836	PYGL	Human	RFU	Protein	20	S2
11442-1	3	SL025837	Delta and Notch-like epidermal growth factor-related receptor:Cytoplasmic domain	DNER:CD	Q8NFT8	92737	DNER	Human	RFU	Protein	20	S1
11444-49	3	SL019460	DNA-directed RNA polymerase III subunit RPC6	RPC6	Q9H1D9	10621	POLR3F	Human	RFU	Protein	20	S1
11448-34	3	SL016433	Galactokinase	GALK1	P51570	2584	GALK1	Human	RFU	Protein	20	S2
11450-110	3	SL004901	Protein disulfide-isomerase	Protein disulfide-isomerase	P07237	5034	P4HB	Human	RFU	Protein	20	S2
11454-87	3	SL012996	Eukaryotic translation initiation factor 3 subunit G	EIF3G	O75821	8666	EIF3G	Human	RFU	Protein	20	S2
11456-2	3	SL019448	Melanoma-associated antigen B10	MAGBA	Q96LZ2	139422	MAGEB10	Human	RFU	Protein	20	S1
11457-53	3	SL014942	UDP-glucose 4-epimerase	GALE	Q14376	2582	GALE	Human	RFU	Protein	20	S2
11458-30	3	SL016460	Poly(rC)-binding protein 1	PCBP1	Q15365	5093	PCBP1	Human	RFU	Protein	20	S2
11459-81	3	SL007290	RNA polymerase II elongation factor ELL	ELL	P55199	8178	ELL	Human	RFU	Protein	20	S1
11462-8	3	SL011160	RNA binding protein fox-1 homolog 2	RBM9	O43251	23543	RBFOX2	Human	RFU	Protein	20	S1
11464-9	3	SL013813	Transcription factor RelB	RELB	Q01201	5971	RELB	Human	RFU	Protein	20	S1
11465-4	3	SL019454	Probable G-protein coupled receptor 135	GP135	Q8IZ08	64582	GPR135	Human	RFU	Protein	20	S1
11468-15	3	SL019467	Probable RNA-binding protein 19	RBM19	Q9Y4C8	9904	RBM19	Human	RFU	Protein	20	S2
11476-43	3	SL009023	Vacuolar protein sorting-associated protein 4A	VPS4A	Q9UN37	27183	VPS4A	Human	RFU	Protein	20	S2
11480-1	3	SL006130	Aldehyde dehydrogenase, dimeric NADP-preferring	Aldehyde dehydrogenase, class 3	P30838	218	ALDH3A1	Human	RFU	Protein	20	S1
11481-25	3	SL007547	Hepatitis A virus cellular receptor 2	TIMD3	Q8TDQ0	84868	HAVCR2	Human	RFU	Protein	20	S2
11486-26	3	SL019479	Zinc finger protein 174	ZN174	Q15697	7727	ZNF174	Human	RFU	Protein	20	S1
11487-4	3	SL010384	Testican-1	Testican-1	Q08629	6695	SPOCK1	Human	RFU	Protein	20	S2
11490-42	3	SL019457	Ubiquitin-like protein 4A	UBL4A	P11441	8266	UBL4A	Human	RFU	Protein	20	S2
11493-169	3	SL019474	Dynein light chain 2, cytoplasmic	DYL2	Q96FJ2	140735	DYNLL2	Human	RFU	Protein	20	S2
11494-4	3	SL019480	RNA polymerase II elongation factor ELL2	ELL2	O00472	22936	ELL2	Human	RFU	Protein	20	S2
11510-31	3	SL005699	Apolipoprotein L1	Apo L1	O14791	8542	APOL1	Human	RFU	Protein	20	S2
11510-51	3	SL005699	Apolipoprotein L1	Apo L1	O14791	8542	APOL1	Human	RFU	Protein	20	S2
11513-92	3	SL002722	ADP-ribosyl cyclase/cyclic ADP-ribose hydrolase 1	CD38	P28907	952	CD38	Human	RFU	Protein	20	S1
11514-196	3	SL004557	CD59 glycoprotein	CD59	P13987	966	CD59	Human	RFU	Protein	20	S3
11516-7	3	SL006131	Fatty acid-binding protein, liver	FABPL	P07148	2168	FABP1	Human	RFU	Protein	20	S2
11530-37	3	SL010978	Porphobilinogen deaminase	HEM3	P08397	3145	HMBS	Human	RFU	Protein	20	S2
11531-24	3	SL025872	V-type immunoglobulin domain-containing suppressor of T-cell activation:Cytoplasmic domain	GI24:CD	Q9H7M9	64115	VSIR	Human	RFU	Protein	20	S2
11534-6	3	SL019063	Leucine-rich repeat, immunoglobulin-like domain and transmembrane domain-containing protein 3	LRIT3	Q3SXY7	345193	LRIT3	Human	RFU	Protein	20	S1
11536-9	3	SL019540	Histone H2A deubiquitinase MYSM1	MYSM1	Q5VVJ2	114803	MYSM1	Human	RFU	Protein	20	S1
11537-12	3	SL008830	Transferrin receptor protein 2	TFR2	Q9UP52	7036	TFR2	Human	RFU	Protein	20	S1
11538-216	3	SL019512	Malonyl-CoA decarboxylase, mitochondrial	DCMC	O95822	23417	MLYCD	Human	RFU	Protein	20	S1
11539-4	3	SL008136	ATP synthase subunit f, mitochondrial	ATPK	P56134	9551	ATP5MF	Human	RFU	Protein	20	S1
11540-37	3	SL012328	Forkhead box protein O3	FOXO3A	O43524	2309	FOXO3	Human	RFU	Protein	20	S2
11542-11	3	SL019529	Transmembrane protein 230	TM230	Q96A57	29058	TMEM230	Human	RFU	Protein	20	S2
11543-84	3	SL006779	LIM domain and actin-binding protein 1	LIMA1	Q9UHB6	51474	LIMA1	Human	RFU	Protein	20	S1
11544-39	3	SL010933	PHD finger protein 3	PHF3	Q92576	23469	PHF3	Human	RFU	Protein	20	S2
11545-9	3	SL004145	Tumor necrosis factor receptor superfamily member 14	HVEM	Q92956	8764	TNFRSF14	Human	RFU	Protein	20	S1
11546-7	3	SL007558	Cytoglobin	CYGB	Q8WWM9	114757	CYGB	Human	RFU	Protein	20	S1
11547-84	3	SL019518	Muscle, skeletal receptor tyrosine-protein kinase	MUSK	O15146	4593	MUSK	Human	RFU	Protein	20	S2
11548-84	3	SL007184	M-phase inducer phosphatase 1	MPIP1	P30304	993	CDC25A	Human	RFU	Protein	20	S1
11549-6	3	SL007314	Insulin gene enhancer protein ISL-1	ISL1	P61371	3670	ISL1	Human	RFU	Protein	20	S1
11551-16	3	SL019534	SWI/SNF-related matrix-associated actin-dependent regulator of chromatin subfamily E member 1-related	HM20B	Q9P0W2	10362	HMG20B	Human	RFU	Protein	20	S1
11556-19	3	SL015077	ADP-ribosylation factor GTPase-activating protein 1	ARFG1	Q8N6T3	55738	ARFGAP1	Human	RFU	Protein	20	S2
11557-3	3	SL007679	E3 ubiquitin-protein ligase SMURF1	SMUF1	Q9HCE7	57154	SMURF1	Human	RFU	Protein	20	S1
11560-76	3	SL007428	Nuclear factor of activated T-cells, cytoplasmic 4	NFAC4	Q14934	4776	NFATC4	Human	RFU	Protein	20	S1
11562-9	3	SL014854	DNA polymerase epsilon subunit 2	DPOE2	P56282	5427	POLE2	Human	RFU	Protein	20	S1
11563-51	3	SL025998	Synaptotagmin-like protein 4:Ca2+-dependent membrane-targeting module 2	SYTL4:C2 2	Q96C24	94121	SYTL4	Human	RFU	Protein	20	S1
11565-58	3	SL019525	Zinc finger protein 23	ZNF23	P17027	7571	ZNF23	Human	RFU	Protein	20	S1
11566-48	3	SL009148	Keratin, type II cytoskeletal 72	Keratin 72	Q14CN4	140807	KRT72	Human	RFU	Protein	20	S1
11567-23	3	SL019535	Zinc finger protein 10	ZNF10	P21506	7556	ZNF10	Human	RFU	Protein	20	S1
11568-2	3	SL007323	Peptidyl-prolyl cis-trans isomerase FKBP1B	FKB1B	P68106	2281	FKBP1B	Human	RFU	Protein	20	S2
11570-94	3	SL019514	B-cell receptor-associated protein 29	BAP29	Q9UHQ4	55973	BCAP29	Human	RFU	Protein	20	S1
11571-75	3	SL025943	NKG2-E type II integral membrane protein:Isoform E, Extracellular domain	NKG2E:ECD	Q07444	3823	KLRC3	Human	RFU	Protein	20	S2
11572-4	3	SL010968	Dynamin-2	DYN2	P50570	1785	DNM2	Human	RFU	Protein	20	S2
11573-3	3	SL017909	Serine/arginine-rich splicing factor 6	SRSF6	Q13247	6431	SRSF6	Human	RFU	Protein	20	S2
11582-63	3	SL007975	DnaJ homolog subfamily A member 2	DNJA2	O60884	10294	DNAJA2	Human	RFU	Protein	20	S1
11586-2	3	SL025923	Leucine-rich repeat neuronal protein 1:Extracellular domain	LRRN1:ECD	Q6UXK5	57633	LRRN1	Human	RFU	Protein	20	S2
11587-5	3	SL019521	MAX gene-associated protein	MGAP	Q8IWI9	23269	MGA	Human	RFU	Protein	20	S1
11590-5	3	SL019537	Probable RNA-binding protein 23	RBM23	Q86U06	55147	RBM23	Human	RFU	Protein	20	S2
11591-43	3	SL007011	Protein regulator of cytokinesis 1	PRC1	O43663	9055	PRC1	Human	RFU	Protein	20	S1
11592-1	3	SL011997	ELAV-like protein 1	ELAV1	Q15717	1994	ELAVL1	Human	RFU	Protein	20	S2
11593-21	3	SL003188	C-X-C motif chemokine 9	MIG	Q07325	4283	CXCL9	Human	RFU	Protein	20	S1
11596-47	3	SL019527	Zinc finger protein 75D	ZN75D	P51815	7626	ZNF75D	Human	RFU	Protein	20	S1
11601-26	3	SL019516	ATP-dependent RNA helicase DHX8	DHX8	Q14562	1659	DHX8	Human	RFU	Protein	20	S2
11602-12	3	SL025824	Copine-1:Von Willebrand factor type A domain	CPNE1:VWFA	Q99829	8904	CPNE1	Human	RFU	Protein	20	S1
11606-22	3	SL019538	DnaJ homolog subfamily B member 6	DNJB6	O75190	10049	DNAJB6	Human	RFU	Protein	20	S1
11607-15	3	SL016389	Bromodomain-containing protein 1	BRD1	O95696	23774	BRD1	Human	RFU	Protein	20	S1
11608-5	3	SL019511	Microtubule-associated proteins 1A/1B light chain 3B	MLP3B	Q9GZQ8	81631	MAP1LC3B	Human	RFU	Protein	20	S2
11614-29	3	SL013071	Enhancer of rudimentary homolog	ERH	P84090	2079	ERH	Human	RFU	Protein	20	S2
11615-16	3	SL016537	Dual adapter for phosphotyrosine and 3-phosphotyrosine and 3-phosphoinositide	DAPP1	Q9UN19	27071	DAPP1	Human	RFU	Protein	20	S2
11616-9	3	SL013812	Heat shock factor protein 1	HSF1	Q00613	3297	HSF1	Human	RFU	Protein	20	S2
11617-1	3	SL004121	Integrin alpha-L	LFA-1 alpha-L chain	P20701	3683	ITGAL	Human	RFU	Protein	20	S1
11618-83	3	SL007101	Transcriptional activator Myb	MYB	P10242	4602	MYB	Human	RFU	Protein	20	S1
11626-7	3	SL008563	Ubiquitin-conjugating enzyme E2 variant 1	UB2V1	Q13404	387522	UBE2V1	Human	RFU	Protein	20	S2
11629-36	3	SL007634	TNF receptor-associated factor 4	TRAF4	Q9BUZ4	9618	TRAF4	Human	RFU	Protein	20	S1
11633-89	3	SL013002	Activator of 90 kDa heat shock protein ATPase homolog 1	AHSA1	O95433	10598	AHSA1	Human	RFU	Protein	20	S2
11634-32	3	SL016376	Regulator of G-protein signaling 10	RGS10	O43665	6001	RGS10	Human	RFU	Protein	20	S2
11636-33	3	SL004811	Transgelin-2	Transgelin-2	P37802	8407	TAGLN2	Human	RFU	Protein	20	S2
11638-42	3	SL019577	Beta-1,3-galactosyltransferase 2	B3GT2	O43825	8707	B3GALT2	Human	RFU	Protein	20	S2
11643-73	3	SL019554	E3 ubiquitin-protein ligase DTX3L	DTX3L	Q8TDB6	151636	DTX3L	Human	RFU	Protein	20	S2
11645-9	3	SL012417	Prolyl 4-hydroxylase subunit alpha-1	P4HA1	P13674	5033	P4HA1	Human	RFU	Protein	20	S1
11646-4	3	SL005434	Carbohydrate sulfotransferase 9	Carbohydrate sulfotransferase 9	Q7L1S5	83539	CHST9	Human	RFU	Protein	20	S1
11647-6	3	SL025866	Frizzled-10:Cytoplasmic domain	Frizzled-10:CD	Q9ULW2	11211	FZD10	Human	RFU	Protein	20	S2
11649-3	3	SL019547	Stromal membrane-associated protein 1	SMAP1	Q8IYB5	60682	SMAP1	Human	RFU	Protein	20	S2
11651-24	3	SL019555	Protein argonaute-1	AGO1	Q9UL18	26523	AGO1	Human	RFU	Protein	20	S1
11653-69	3	SL019569	Sodium- and chloride-dependent glycine transporter 1	SC6A9	P48067	6536	SLC6A9	Human	RFU	Protein	20	S1
11654-77	3	SL019578	Neurensin-1	NRSN1	Q8IZ57	140767	NRSN1	Human	RFU	Protein	20	S1
11656-110	3	SL007751	Ena/VASP-like protein	EVL	Q9UI08	51466	EVL	Human	RFU	Protein	20	S1
11657-86	3	SL006979	Suppressor of cytokine signaling 7	SOCS7	O14512	30837	SOCS7	Human	RFU	Protein	20	S1
11659-31	3	SL011224	Clathrin interactor 1	EPN4	Q14677	9685	CLINT1	Human	RFU	Protein	20	S2
11661-11	3	SL019570	NACHT, LRR and PYD domains-containing protein 1	NALP1	Q9C000	22861	NLRP1	Human	RFU	Protein	20	S1
11664-32	3	SL019543	ADP-ribosylation factor GTPase-activating protein 2	ARFG2	Q8N6H7	84364	ARFGAP2	Human	RFU	Protein	20	S1
11666-72	3	SL019551	Regulator of G-protein signaling 8	RGS8	P57771	85397	RGS8	Human	RFU	Protein	20	S1
11667-29	3	SL019556	Tensin-2	TENC1	Q63HR2	23371	TNS2	Human	RFU	Protein	20	S1
11669-39	3	SL019571	Solute carrier organic anion transporter family member 5A1	SO5A1	Q9H2Y9	81796	SLCO5A1	Human	RFU	Protein	20	S1
11670-18	3	SL019419	Probable G-protein coupled receptor 101	GP101	Q96P66	83550	GPR101	Human	RFU	Protein	20	S1
11671-19	3	SL019544	Peregrin	BRPF1	P55201	7862	BRPF1	Human	RFU	Protein	20	S2
11672-17	3	SL019549	Kinesin-like protein KIF16B	KI16B	Q96L93	55614	KIF16B	Human	RFU	Protein	20	S1
11677-17	3	SL019579	Probable palmitoyltransferase ZDHHC14	ZDH14	Q8IZN3	79683	ZDHHC14	Human	RFU	Protein	20	S1
11678-105	3	SL019586	Gap junction delta-2 protein	CXD2	Q9UKL4	57369	GJD2	Human	RFU	Protein	20	S1
11681-8	3	SL007271	Arf-GAP domain and FG repeat-containing protein 1	NUPL	P52594	3267	AGFG1	Human	RFU	Protein	20	S2
11682-7	3	SL015231	Thioredoxin-interacting protein	TXNIP	Q9H3M7	10628	TXNIP	Human	RFU	Protein	20	S1
11683-19	3	SL019567	ADP-ribosylation factor-binding protein GGA3	GGA3	Q9NZ52	23163	GGA3	Human	RFU	Protein	20	S2
11690-47	3	SL019558	Anaphase-promoting complex subunit 7	APC7	Q9UJX3	51434	ANAPC7	Human	RFU	Protein	20	S1
11692-21	3	SL019573	SHC-transforming protein 4	SHC4	Q6S5L8	399694	SHC4	Human	RFU	Protein	20	S2
11696-7	3	SL008838	Cellular retinoic acid-binding protein 2	RABP2	P29373	1382	CRABP2	Human	RFU	Protein	20	S2
11699-16	3	SL014919	Protein tyrosine phosphatase type IVA 2	TP4A2	Q12974	8073	PTP4A2	Human	RFU	Protein	20	S1
11708-2	3	SL007868	Lipocalin-1	LCN1	P31025	3933	LCN1	Human	RFU	Protein	20	S2
11709-29	3	SL015112	Carnitine O-palmitoyltransferase 1, muscle isoform	CPT1B	Q92523	1375	CPT1B	Human	RFU	Protein	20	S1
11712-207	3	SL011294	Protein unc-45 homolog A	UN45A	Q9H3U1	55898	UNC45A	Human	RFU	Protein	20	S1
11715-1	3	SL019568	POU domain, class 2, transcription factor 1	PO2F1	P14859	5451	POU2F1	Human	RFU	Protein	20	S1
11716-28	3	SL019575	Leucine-rich repeat, immunoglobulin-like domain and transmembrane domain-containing protein 2	LRIT2	A6NDA9	340745	LRIT2	Human	RFU	Protein	20	S1
11814-29	3	SL000134	Hepatocyte growth factor receptor	Met	P08581	4233	MET	Human	RFU	Protein	20	S2
11816-84	3	SL007025	Tyrosine-protein kinase JAK2	JAK2	O60674	3717	JAK2	Human	RFU	Protein	20	S2
11817-1	3	SL018792	Ribosomal protein S6 kinase beta-1	KS6B1	P23443	6198	RPS6KB1	Human	RFU	Protein	20	S1
11825-27	3	SL013877	Peroxisome proliferator-activated receptor gamma coactivator 1-alpha	PRGC1	Q9UBK2	10891	PPARGC1A	Human	RFU	Protein	20	S1
11827-7	3	SL019486	Nuclear receptor ROR-gamma	RORG	P51449	6097	RORC	Human	RFU	Protein	20	S1
11830-48	3	SL010616	Tyrosine-protein phosphatase non-receptor type 11	SHP-2	Q06124	5781	PTPN11	Human	RFU	Protein	20	S1
11833-83	3	SL012513	Frataxin, mitochondrial	FRDA	Q16595	2395	FXN	Human	RFU	Protein	20	S1
11836-144	3	SL004119	Epithelial discoidin domain-containing receptor 1	discoidin domain receptor 1	Q08345	780	DDR1	Human	RFU	Protein	20	S2
11837-7	3	SL004859	Tumor necrosis factor receptor superfamily member 18	GITR	Q9Y5U5	8784	TNFRSF18	Human	RFU	Protein	20	S1
11838-130	3	SL010815	Piezo-type mechanosensitive ion channel component 1	FA38A	Q92508	9780	PIEZO1	Human	RFU	Protein	20	S1
11851-21	3	SL017099	Triggering receptor expressed on myeloid cells 2	TREM2	Q9NZC2	54209	TREM2	Human	RFU	Protein	20	S2
11872-9	3	SL019027	Protocadherin gamma-B1	PCDGD	Q9Y5G3	56104	PCDHGB1	Human	RFU	Protein	20	S1
11910-27	3	SL019039	Homeobox protein DLX-4	DLX4	Q92988	1748	DLX4	Human	RFU	Protein	20	S1
11911-13	3	SL025919	Leucine-rich repeat-containing protein 4B:Cytoplasmic domain	LRC4B:CD	Q9NT99	94030	LRRC4B	Human	RFU	Protein	20	S1
11926-23	3	SL012582	Alpha- and gamma-adaptin-binding protein p34	P34	Q6PD74	79719	AAGAB	Human	RFU	Protein	20	S2
11934-9	3	SL015014	Integrator complex subunit 3	INT3	Q68E01	65123	INTS3	Human	RFU	Protein	20	S1
11949-25	3	SL025843	Epidermal growth factor:Cytoplasmic domain	EGF:CD	P01133	1950	EGF	Human	RFU	Protein	20	S1
11952-1	3	SL025881	Immunoglobulin superfamily DCC subclass member 3:Cytoplasmic domain	IGDC3:CD	Q8IVU1	9543	IGDCC3	Human	RFU	Protein	20	S1
11955-1	3	SL025968	Rho GTPase-activating protein 1:Rho-GTPase activating protein domain	RHG01:Rho-GAP	Q07960	392	ARHGAP1	Human	RFU	Protein	20	S2
11967-23	3	SL013765	Cellular retinoic acid-binding protein 1	RABP1	P29762	1381	CRABP1	Human	RFU	Protein	20	S2
11969-5	3	SL004807	Protein S100-A2	S100A2	P29034	6273	S100A2	Human	RFU	Protein	20	S1
11988-24	3	SL015251	Receptor-type tyrosine-protein phosphatase H	PTPRH	Q9HD43	5794	PTPRH	Human	RFU	Protein	20	S1
11989-35	3	SL019200	ER membrane protein complex subunit 1	EMC1	Q8N766	23065	EMC1	Human	RFU	Protein	20	S1
12001-7	3	SL006520	Tight junction protein ZO-1	ZO1	Q07157	7082	TJP1	Human	RFU	Protein	20	S1
12008-3	3	SL007098	T-cell antigen CD7	CD7	P09564	924	CD7	Human	RFU	Protein	20	S2
12014-19	3	SL019226	6-pyruvoyl tetrahydrobiopterin synthase	PTPS	Q03393	5805	PTS	Human	RFU	Protein	20	S2
12016-60	3	SL013756	E3 ubiquitin-protein ligase CBL	CBL	P22681	867	CBL	Human	RFU	Protein	20	S2
12018-84	3	SL019230	Thiamin pyrophosphokinase 1	TPK1	Q9H3S4	27010	TPK1	Human	RFU	Protein	20	S1
12020-39	3	SL010883	Bisphosphoglycerate mutase	PMGE	P07738	669	BPGM	Human	RFU	Protein	20	S2
12022-12	3	SL000132	Mothers against decapentaplegic homolog 4	SMAD4	Q13485	4089	SMAD4	Human	RFU	Protein	20	S1
12030-82	3	SL004900	Desmin	Desmin	P17661	1674	DES	Human	RFU	Protein	20	S2
12033-3	3	SL007012	Mitotic checkpoint serine/threonine-protein kinase BUB1	BUB1	O43683	699	BUB1	Human	RFU	Protein	20	S1
12046-51	3	SL011216	TAR DNA-binding protein 43	TADBP	Q13148	23435	TARDBP	Human	RFU	Protein	20	S1
12077-32	3	SL004357	Growth/differentiation factor 8	Myostatin	O14793	2660	MSTN	Human	RFU	Protein	20	S2
12329-21	3	SL013834	Ribosomal protein S6 kinase alpha-1	KS6A1	Q15418	6195	RPS6KA1	Human	RFU	Protein	20	S2
12332-7	3	SL019680	Eukaryotic elongation factor 2 kinase	EF2K	O00418	29904	EEF2K	Human	RFU	Protein	20	S2
12333-87	3	SL010958	Ribose-5-phosphate isomerase	RPIA	P49247	22934	RPIA	Human	RFU	Protein	20	S2
12334-25	3	SL004695	Serine hydroxymethyltransferase, cytosolic	cSHMT	P34896	6470	SHMT1	Human	RFU	Protein	20	S1
12338-27	3	SL019671	Pikachurin	EGFLA	Q63HQ2	133584	EGFLAM	Human	RFU	Protein	20	S2
12340-17	3	SL011196	Alanine--tRNA ligase, cytoplasmic	SYAC	P49588	16	AARS1	Human	RFU	Protein	20	S2
12341-8	3	SL007465	Dual specificity protein phosphatase 6	DUS6	Q16828	1848	DUSP6	Human	RFU	Protein	20	S2
12343-14	3	SL011226	Arf-GAP with coiled-coil, ANK repeat and PH domain-containing protein 2	CENB2	Q15057	23527	ACAP2	Human	RFU	Protein	20	S2
12345-4	3	SL019703	Anaphase-promoting complex subunit 10	APC10	Q9UM13	10393	ANAPC10	Human	RFU	Protein	20	S1
12347-29	3	SL019675	Cerebral cavernous malformations 2 protein	CCM2	Q9BSQ5	83605	CCM2	Human	RFU	Protein	20	S2
12348-46	3	SL019681	Serine--tRNA ligase, mitochondrial	SYSM	Q9NP81	54938	SARS2	Human	RFU	Protein	20	S1
12350-86	3	SL018899	Protein C-ets-2	ETS2	P15036	2114	ETS2	Human	RFU	Protein	20	S2
12351-25	3	SL004396	Signal transducer and activator of transcription 1-alpha/beta	STAT1	P42224	6772	STAT1	Human	RFU	Protein	20	S2
12352-70	3	SL019698	Arrestin domain-containing protein 3	ARRD3	Q96B67	57561	ARRDC3	Human	RFU	Protein	20	S1
12355-223	3	SL019676	Ribosome-recycling factor, mitochondrial	RRFM	Q96E11	92399	MRRF	Human	RFU	Protein	20	S1
12356-65	3	SL005002	Sorcin	Sorcin	P30626	6717	SRI	Human	RFU	Protein	20	S2
12357-41	3	SL016390	Synaptosomal-associated protein 29	SNP29	O95721	9342	SNAP29	Human	RFU	Protein	20	S1
12358-6	3	SL007325	Immunoglobulin-binding protein 1	IGBP1	P78318	3476	IGBP1	Human	RFU	Protein	20	S2
12361-102	3	SL008513	Ras-related protein R-Ras2	RRAS2	P62070	22800	RRAS2	Human	RFU	Protein	20	S1
12363-70	3	SL015111	Tribbles homolog 2	TRIB2	Q92519	28951	TRIB2	Human	RFU	Protein	20	S1
12365-108	3	SL009453	RuvB-like 1	RUVB1	Q9Y265	8607	RUVBL1	Human	RFU	Protein	20	S2
12366-16	3	SL008832	Gamma-crystallin D	CRGD	P07320	1421	CRYGD	Human	RFU	Protein	20	S2
12367-52	3	SL019694	Macoilin	MACOI	Q8N5G2	55219	MACO1	Human	RFU	Protein	20	S1
12368-18	3	SL013848	Histone acetyltransferase KAT2B	PCAF	Q92831	8850	KAT2B	Human	RFU	Protein	20	S1
12370-30	3	SL006348	Apolipoprotein F	Apo F	Q13790	319	APOF	Human	RFU	Protein	20	S2
12372-50	3	SL005671	Tropomyosin alpha-3 chain	Tropomyosin alpha-3 chain	P06753	7170	TPM3	Human	RFU	Protein	20	S1
12373-73	3	SL014875	Transformer-2 protein homolog beta	TRA2B	P62995	6434	TRA2B	Human	RFU	Protein	20	S2
12374-8	3	SL019686	Platelet-activating factor acetylhydrolase IB subunit gamma	PA1B3	Q15102	5050	PAFAH1B3	Human	RFU	Protein	20	S2
12376-85	3	SL003762	Cyclin-dependent kinase 4 inhibitor D	p19-INK4d	P55273	1032	CDKN2D	Human	RFU	Protein	20	S2
12378-71	3	SL012578	Tapasin	TPSN	O15533	6892	TAPBP	Human	RFU	Protein	20	S2
12381-26	3	SL008046	Carbonyl reductase [NADPH] 1	CBR1	P16152	873	CBR1	Human	RFU	Protein	20	S2
12382-2	3	SL019687	Probable ATP-dependent RNA helicase DDX58	DDX58	O95786	23586	DDX58	Human	RFU	Protein	20	S1
12384-92	3	SL019700	COP9 signalosome complex subunit 7b	CSN7B	Q9H9Q2	64708	COPS7B	Human	RFU	Protein	20	S2
12385-4	3	SL006471	Calpain-3	CAN3	P20807	825	CAPN3	Human	RFU	Protein	20	S2
12386-11	3	SL012837	Aminopeptidase B	AMPB	Q9H4A4	6051	RNPEP	Human	RFU	Protein	20	S2
12387-7	3	SL013045	PDZ and LIM domain protein 4	PDLI4	P50479	8572	PDLIM4	Human	RFU	Protein	20	S1
12389-4	3	SL007790	Origin recognition complex subunit 6	ORC6	Q9Y5N6	23594	ORC6	Human	RFU	Protein	20	S2
12391-27	3	SL019695	PDZ domain-containing protein 7	PDZD7	Q9H5P4	79955	PDZD7	Human	RFU	Protein	20	S1
12392-30	3	SL019701	ADP-ribosylation factor-like protein 1	ARL1	P40616	400	ARL1	Human	RFU	Protein	20	S2
12394-53	3	SL006601	Transmembrane protein C16orf54	CP054	Q6UWD8	283897	C16orf54	Human	RFU	Protein	20	S1
12395-86	3	SL019677	Aspartate--tRNA ligase, mitochondrial	SYDM	Q6PI48	55157	DARS2	Human	RFU	Protein	20	S2
12396-19	3	SL006368	3-hydroxyisobutyryl-CoA hydrolase, mitochondrial	HIBCH	Q6NVY1	26275	HIBCH	Human	RFU	Protein	20	S2
12398-15	3	SL019692	Paired box protein Pax-4	PAX4	O43316		PAX4	Human	RFU	Protein	20	S1
12399-194	3	SL013198	Coiled-coil domain-containing protein 50	CCD50	Q8IVM0	152137	CCDC50	Human	RFU	Protein	20	S2
12400-25	3	SL015259	Ubiquitin-conjugating enzyme E2 T	UBE2T	Q9NPD8	29089	UBE2T	Human	RFU	Protein	20	S1
12401-3	3	SL019706	AMSH-like protease	STALP	Q96FJ0	57559	STAMBPL1	Human	RFU	Protein	20	S2
12403-30	3	SL019678	Ras-related protein Rab-39B	RB39B	Q96DA2	116442	RAB39B	Human	RFU	Protein	20	S1
12406-119	3	SL000635	GTP-binding protein Di-Ras3	ARHI	O95661	9077	DIRAS3	Human	RFU	Protein	20	S1
12408-333	3	SL015330	Ras-related protein Rab-22A	RB22A	Q9UL26	57403	RAB22A	Human	RFU	Protein	20	S1
12409-90	3	SL019707	Ras-related protein Rab-7b	RAB7B	Q96AH8	338382	RAB7B	Human	RFU	Protein	20	S1
12411-60	3	SL019679	Protein max	MAX	P61244	4149	MAX	Human	RFU	Protein	20	S2
12414-31	3	SL004815	14-3-3 protein beta/alpha	14-3-3 protein beta/alpha	P31946	7529	YWHAB	Human	RFU	Protein	20	S2
12415-122	3	SL011710	Endothelial differentiation-related factor 1	EDF1	O60869	8721	EDF1	Human	RFU	Protein	20	S2
12417-46	3	SL019708	EKC/KEOPS complex subunit TPRKB	TPRKB	Q9Y3C4	51002	TPRKB	Human	RFU	Protein	20	S2
12422-143	3	SL019693	Arachidonate 15-lipoxygenase B	LX15B	O15296	247	ALOX15B	Human	RFU	Protein	20	S2
12423-38	3	SL019697	APOBEC1 complementation factor	A1CF	Q9NQ94	29974	A1CF	Human	RFU	Protein	20	S1
12424-107	3	SL019702	Thymocyte nuclear protein 1	THYN1	Q9P016	29087	THYN1	Human	RFU	Protein	20	S1
12425-104	3	SL008834	ADP-ribosylation factor 6	ARF6	P62330	382	ARF6	Human	RFU	Protein	20	S2
12426-19	3	SL016520	MOB kinase activator 1A	MOL1B	Q9H8S9	55233	MOB1A	Human	RFU	Protein	20	S2
12427-8	3	SL007185	M-phase inducer phosphatase 2	MPIP2	P30305	994	CDC25B	Human	RFU	Protein	20	S1
12428-2	3	SL015008	Lysophospholipase-like protein 1	LYPL1	Q5VWZ2	127018	LYPLAL1	Human	RFU	Protein	20	S1
12430-78	3	SL011150	Polyadenylate-binding protein-interacting protein 1	PAIP1	Q9H074	10605	PAIP1	Human	RFU	Protein	20	S1
12431-13	3	SL019737	Protein pelota homolog	PELO	Q9BRX2	53918	PELO	Human	RFU	Protein	20	S1
12432-23	3	SL010232	Calcyclin-binding protein	CYBP	Q9HB71	27101	CACYBP	Human	RFU	Protein	20	S2
12433-8	3	SL019709	ADP-ribosylation factor-like protein 11	ARL11	Q969Q4	115761	ARL11	Human	RFU	Protein	20	S2
12434-25	3	SL008617	IST1 homolog	K0174	P53990	9798	IST1	Human	RFU	Protein	20	S2
12437-18	3	SL019726	Serine/threonine-protein kinase ULK3	ULK3	Q6PHR2	25989	ULK3	Human	RFU	Protein	20	S1
12438-127	3	SL014754	DNA-3-methyladenine glycosylase	3MG	P29372	4350	MPG	Human	RFU	Protein	20	S2
12439-67	3	SL004395	Interferon regulatory factor 9	ISGF3	Q00978	10379	IRF9	Human	RFU	Protein	20	S1
12442-4	3	SL019715	Rho-related GTP-binding protein RhoD	RHOD	O00212	29984	RHOD	Human	RFU	Protein	20	S1
12444-39	3	SL006967	Nuclear receptor subfamily 5 group A member 2	NR5A2	O00482	2494	NR5A2	Human	RFU	Protein	20	S1
12445-50	3	SL019727	Ankyrin repeat domain-containing protein 27	ANR27	Q96NW4	84079	ANKRD27	Human	RFU	Protein	20	S1
12446-49	3	SL005253	Glutathione S-transferase A1	GST A1-1	P08263	2938	GSTA1	Human	RFU	Protein	20	S1
12448-246	3	SL006476	Glycylpeptide N-tetradecanoyltransferase 1	NMT1	P30419	4836	NMT1	Human	RFU	Protein	20	S2
12449-16	3	SL012991	Peptidyl-prolyl cis-trans isomerase H	PPIH	O43447	10465	PPIH	Human	RFU	Protein	20	S2
12450-42	3	SL016459	Phosphomevalonate kinase	PMVK	Q15126	10654	PMVK	Human	RFU	Protein	20	S1
12451-62	3	SL018858	Transcription regulator protein BACH1	BACH1	O14867	571	BACH1	Human	RFU	Protein	20	S1
12452-32	3	SL019721	Histone-lysine N-methyltransferase SUV420H2	SV422	Q86Y97	84787	KMT5C	Human	RFU	Protein	20	S1
12453-161	3	SL019728	Nuclear RNA export factor 1	NXF1	Q9UBU9	10482	NXF1	Human	RFU	Protein	20	S1
12454-105	3	SL019732	N-terminal Xaa-Pro-Lys N-methyltransferase 1	NTM1A	Q9BV86	28989	NTMT1	Human	RFU	Protein	20	S1
12455-48	3	SL019739	Myoneurin	MYNN	Q9NPC7	55892	MYNN	Human	RFU	Protein	20	S1
12456-5	3	SL019744	6-phosphofructo-2-kinase/fructose-2,6-bisphosphatase 3	F263	Q16875	5209	PFKFB3	Human	RFU	Protein	20	S2
12457-10	3	SL019711	1,2-dihydroxy-3-keto-5-methylthiopentene dioxygenase	MTND	Q9BV57	55256	ADI1	Human	RFU	Protein	20	S2
12458-79	3	SL016506	Calcineurin B homologous protein 1	CHP1	Q99653	11261	CHP1	Human	RFU	Protein	20	S2
12459-13	3	SL007671	Pleckstrin homology domain-containing family A member 1	PKHA1	Q9HB21	59338	PLEKHA1	Human	RFU	Protein	20	S1
12460-18	3	SL008613	Proteasome subunit alpha type-7	PSA7	O14818	5688	PSMA7	Human	RFU	Protein	20	S2
12461-8	3	SL013283	NAD-dependent protein deacylase sirtuin-5, mitochondrial	SIRT5	Q9NXA8	23408	SIRT5	Human	RFU	Protein	20	S2
12462-20	3	SL019733	Histone-lysine N-methyltransferase SETMAR	SETMR	Q53H47	6419	SETMAR	Human	RFU	Protein	20	S1
12463-7	3	SL019740	Kelch-like protein 13	KLH13	Q9P2N7	90293	KLHL13	Human	RFU	Protein	20	S2
12466-7	3	SL008019	Heterogeneous nuclear ribonucleoprotein A1	ROA1	P09651	3178	HNRNPA1	Human	RFU	Protein	20	S2
12469-19	3	SL011230	Microtubule-associated protein RP/EB family member 1	MARE1	Q15691	22919	MAPRE1	Human	RFU	Protein	20	S2
12471-47	3	SL007061	Double-stranded RNA-binding protein Staufen homolog 1	STAU1	O95793	6780	STAU1	Human	RFU	Protein	20	S2
12473-48	3	SL015285	BTB/POZ domain-containing protein KCTD5	KCTD5	Q9NXV2	54442	KCTD5	Human	RFU	Protein	20	S1
12475-48	3	SL019722	Chloride intracellular channel protein 5	CLIC5	Q9NZA1	53405	CLIC5	Human	RFU	Protein	20	S2
12476-50	3	SL013278	Fructose-2,6-bisphosphatase TIGAR	TIGAR	Q9NQ88	57103	TIGAR	Human	RFU	Protein	20	S1
12477-42	3	SL019734	Translin	TSN	Q15631	7247	TSN	Human	RFU	Protein	20	S2
12478-15	3	SL008862	60S ribosomal protein L30	RL30	P62888	6156	RPL30	Human	RFU	Protein	20	S2
12479-50	3	SL014768	cAMP-dependent protein kinase type I-beta regulatory subunit	KAP1	P31321	5575	PRKAR1B	Human	RFU	Protein	20	S2
12482-5	3	SL007512	Nucleosome-remodeling factor subunit BPTF	BPTF	Q12830	2186	BPTF	Human	RFU	Protein	20	S1
12483-62	3	SL007576	Nuclear receptor ROR-beta	RORB	Q92753	6096	RORB	Human	RFU	Protein	20	S2
12484-67	3	SL011194	Phosphatidylinositol transfer protein beta isoform	PIPNB	P48739	23760	PITPNB	Human	RFU	Protein	20	S2
12486-8	3	SL007708	Glutaredoxin-2, mitochondrial	GLRX2	Q9NS18	51022	GLRX2	Human	RFU	Protein	20	S2
12488-9	3	SL015331	Malignant T-cell-amplified sequence 1	MCTS1	Q9ULC4	28985	MCTS1	Human	RFU	Protein	20	S1
12490-92	3	SL019720	Ragulator complex protein LAMTOR3	LTOR3	Q9UHA4	8649	LAMTOR3	Human	RFU	Protein	20	S2
12491-23	3	SL008340	Chloride intracellular channel protein 4	CLIC4	Q9Y696	25932	CLIC4	Human	RFU	Protein	20	S2
12493-42	3	SL019735	Ubiquitin thioesterase OTUB2	OTUB2	Q96DC9	78990	OTUB2	Human	RFU	Protein	20	S2
12494-99	3	SL019741	Gamma-aminobutyric acid receptor-associated protein-like 2	GBRL2	P60520	11345	GABARAPL2	Human	RFU	Protein	20	S2
12497-29	3	SL015180	Tudor-interacting repair regulator protein	SDOS	Q9BRJ7	84309	NUDT16L1	Human	RFU	Protein	20	S2
12498-12	3	SL019719	Tax1-binding protein 3	TX1B3	O14907	30851	TAX1BP3	Human	RFU	Protein	20	S2
12499-108	3	SL015171	Endophilin-A1	SH3G2	Q99962	6456	SH3GL2	Human	RFU	Protein	20	S2
12501-10	3	SL008849	Tubulin-specific chaperone A	TBCA	O75347	6902	TBCA	Human	RFU	Protein	20	S2
12503-5	3	SL007451	Ovarian cancer G-protein coupled receptor 1	SPR1	Q15743	8111	GPR68	Human	RFU	Protein	20	S2
12504-26	3	SL008078	Leiomodin-1	LMOD1	P29536	25802	LMOD1	Human	RFU	Protein	20	S1
12507-16	3	SL019723	Inositol-trisphosphate 3-kinase C	IP3KC	Q96DU7	80271	ITPKC	Human	RFU	Protein	20	S1
12508-9	3	SL008756	Charged multivesicular body protein 3	CHMP3	Q9Y3E7	100526767	CHMP3	Human	RFU	Protein	20	S2
12509-115	3	SL019736	COMM domain-containing protein 1	COMD1	Q8N668	150684	COMMD1	Human	RFU	Protein	20	S1
12510-3	3	SL019742	Signal-transducing adaptor protein 1	STAP1	Q9ULZ2	26228	STAP1	Human	RFU	Protein	20	S2
12511-83	3	SL019747	Solute carrier family 41 member 2	S41A2	Q96JW4	84102	SLC41A2	Human	RFU	Protein	20	S1
12513-8	3	SL008826	Glycolipid transfer protein	GLTP	Q9NZD2	51228	GLTP	Human	RFU	Protein	20	S2
12514-16	3	SL004624	tRNA (guanine-N(7)-)-methyltransferase	METTL1	Q9UBP6	4234	METTL1	Human	RFU	Protein	20	S1
12515-45	3	SL019724	Uridine-cytidine kinase 2	UCK2	Q9BZX2	7371	UCK2	Human	RFU	Protein	20	S1
12516-13	3	SL019731	Transcriptional enhancer factor TEF-3	TEAD4	Q15561	7004	TEAD4	Human	RFU	Protein	20	S1
12517-52	3	SL003787	Programmed cell death protein 5	TFAR19	O14737	9141	PDCD5	Human	RFU	Protein	20	S2
12518-289	3	SL011258	Protein polybromo-1	PB1	Q86U86	55193	PBRM1	Human	RFU	Protein	20	S2
12521-3	3	SL007230	Cyclin-dependent kinase 4 inhibitor C	CDN2C	P42773	1031	CDKN2C	Human	RFU	Protein	20	S2
12522-6	3	SL011201	UV excision repair protein RAD23 homolog B	RD23B	P54727	5887	RAD23B	Human	RFU	Protein	20	S2
12524-18	3	SL019774	Diamine acetyltransferase 2	SAT2	Q96F10	112483	SAT2	Human	RFU	Protein	20	S1
12527-50	3	SL013736	Thyroid hormone receptor alpha	THA	P10827	7067	THRA	Human	RFU	Protein	20	S1
12528-40	3	SL019761	ATPase WRNIP1	WRIP1	Q96S55	56897	WRNIP1	Human	RFU	Protein	20	S1
12530-14	3	SL005032	Cyclin-dependent kinases regulatory subunit 1	CKS-1	P61024	1163	CKS1B	Human	RFU	Protein	20	S2
12531-5	3	SL019768	Endogenous retrovirus group V member 1 Env polyprotein	ERVV1	B6SEH8		ERVV-1	Human	RFU	Protein	20	S1
12532-28	3	SL013788	Ubiquitin-conjugating enzyme E2 R1	UB2R1	P49427	997	CDC34	Human	RFU	Protein	20	S2
12533-135	3	SL019781	Cytohesin-2	CYH2	Q99418	9266	CYTH2	Human	RFU	Protein	20	S1
12534-10	3	SL019796	Calcium-binding and coiled-coil domain-containing protein 2	CACO2	Q13137	10241	CALCOCO2	Human	RFU	Protein	20	S2
12535-2	3	SL013748	DNA repair protein XRCC1	XRCC1	P18887	7515	XRCC1	Human	RFU	Protein	20	S1
12536-46	3	SL019758	Myotubularin-related protein 6	MTMR6	Q9Y217	9107	MTMR6	Human	RFU	Protein	20	S1
12537-88	3	SL013811	Transcriptional activator protein Pur-alpha	PURA	Q00577	5813	PURA	Human	RFU	Protein	20	S1
12538-19	3	SL019759	Regulator of G-protein signaling 7	RGS7	P49802	6000	RGS7	Human	RFU	Protein	20	S2
12540-25	3	SL019775	Rho-related GTP-binding protein RhoG	RHOG	P84095	391	RHOG	Human	RFU	Protein	20	S2
12543-76	3	SL019752	Zinc finger protein 560	ZN560	Q96MR9	147741	ZNF560	Human	RFU	Protein	20	S1
12546-1	3	SL014839	Smoothelin	SMTN	P53814	6525	SMTN	Human	RFU	Protein	20	S2
12548-75	3	SL019776	Ras-related GTP-binding protein C	RRAGC	Q9HB90	64121	RRAGC	Human	RFU	Protein	20	S1
12549-33	3	SL014636	Hematopoietic prostaglandin D synthase	PTGD2	O60760	27306	HPGDS	Human	RFU	Protein	20	S2
12551-3	3	SL007599	E3 ubiquitin-protein ligase Itchy homolog	ITCH	Q96J02	83737	ITCH	Human	RFU	Protein	20	S1
12553-5	3	SL010954	Serine/threonine-protein kinase VRK1	VRK1	Q99986	7443	VRK1	Human	RFU	Protein	20	S1
12554-10	3	SL013725	DNA repair protein RAD51 homolog 4	RA51D	O75771	5892	RAD51D	Human	RFU	Protein	20	S2
12556-7	3	SL006252	Ubiquitin-conjugating enzyme E2 C	UBE2C	O00762	11065	UBE2C	Human	RFU	Protein	20	S2
12557-18	3	SL019782	RNA-binding protein Nova-1	NOVA1	P51513	4857	NOVA1	Human	RFU	Protein	20	S1
12558-3	3	SL011269	Ubiquitin-associated and SH3 domain-containing protein B	UBS3B	Q8TF42	84959	UBASH3B	Human	RFU	Protein	20	S2
12560-9	3	SL008415	5'(3')-deoxyribonucleotidase, cytosolic type	NT5C	Q8TCD5	30833	NT5C	Human	RFU	Protein	20	S2
12562-1	3	SL014979	Serine/threonine-protein kinase N1	PKN1	Q16512	5585	PKN1	Human	RFU	Protein	20	S2
12563-2	3	SL019770	Tumor necrosis factor alpha-induced protein 8	TFIP8	O95379	25816	TNFAIP8	Human	RFU	Protein	20	S2
12564-9	3	SL019777	60S ribosome subunit biogenesis protein NIP7 homolog	NIP7	Q9Y221	51388	NIP7	Human	RFU	Protein	20	S2
12568-14	3	SL017529	Kelch-like ECH-associated protein 1	KEAP1	Q14145	9817	KEAP1	Human	RFU	Protein	20	S1
12569-25	3	SL004993	T-complex protein 1 subunit epsilon	TCP-1-epsilon	P48643	22948	CCT5	Human	RFU	Protein	20	S1
12571-14	3	SL019778	ADP-ribosylation factor-like protein 3	ARL3	P36405	403	ARL3	Human	RFU	Protein	20	S2
12572-236	3	SL019783	Embryonal Fyn-associated substrate	EFS	O43281	10278	EFS	Human	RFU	Protein	20	S2
12573-80	3	SL019797	Tripartite motif-containing protein 3	TRIM3	O75382	10612	TRIM3	Human	RFU	Protein	20	S1
12575-30	3	SL008027	C-1-tetrahydrofolate synthase, cytoplasmic	C1TC	P11586	4522	MTHFD1	Human	RFU	Protein	20	S2
12576-21	3	SL002732	Melanoma-associated antigen 3	MAGE-3	P43357	4102	MAGEA3	Human	RFU	Protein	20	S2
12577-100	3	SL002091	Flap endonuclease 1	FLAP endonuclease-1	P39748	2237	FEN1	Human	RFU	Protein	20	S1
12578-13	3	SL006497	ADP-ribosylation factor 3	ARF3	P61204	377	ARF3	Human	RFU	Protein	20	S2
12580-7	3	SL012949	Proteasome subunit beta type-5	PSB5	P28074	5693	PSMB5	Human	RFU	Protein	20	S2
12581-39	3	SL014587	Inositol monophosphatase 2	IMPA2	O14732	3613	IMPA2	Human	RFU	Protein	20	S1
12583-77	3	SL019755	Serine/threonine-protein kinase A-Raf	ARAF	P10398	369	ARAF	Human	RFU	Protein	20	S2
12585-39	3	SL009589	DNA excision repair protein ERCC-1	ERCC1	P07992	2067	ERCC1	Human	RFU	Protein	20	S1
12587-65	3	SL019779	ADP-ribosylation factor-like protein 2	ARL2	P36404	402	ARL2	Human	RFU	Protein	20	S2
12591-27	3	SL002050	Oligophrenin-1	Oligophrenin-1	O60890	4983	OPHN1	Human	RFU	Protein	20	S1
12593-33	3	SL019751	p53 and DNA damage-regulated protein 1	PDRG1	Q9NUG6	81572	PDRG1	Human	RFU	Protein	20	S2
12594-5	3	SL019772	Grancalcin	GRAN	P28676	25801	GCA	Human	RFU	Protein	20	S2
12595-11	3	SL010848	Tropomodulin-1	TMOD1	P28289	7111	TMOD1	Human	RFU	Protein	20	S2
12597-68	3	SL019171	Autophagy protein 5	Autophagy protein 5	Q9H1Y0	9474	ATG5	Human	RFU	Protein	20	S2
12599-10	3	SL010979	Fermitin family homolog 3	URP2	Q86UX7	83706	FERMT3	Human	RFU	Protein	20	S2
12603-87	3	SL019780	Polyadenylate-binding protein 4	PABP4	Q13310	8761	PABPC4	Human	RFU	Protein	20	S2
12604-16	3	SL019785	Polycomb protein SCMH1	SCMH1	Q96GD3	22955	SCMH1	Human	RFU	Protein	20	S1
12605-1	3	SL005742	Exosome complex component RRP40	Exosome component 3	Q9NQT5	51010	EXOSC3	Human	RFU	Protein	20	S1
12612-37	3	SL008624	Proteasome subunit beta type-1	PSB1	P20618	5689	PSMB1	Human	RFU	Protein	20	S2
12616-45	3	SL019803	Nuclear receptor-binding protein	NRBP	Q9UHY1	29959	NRBP1	Human	RFU	Protein	20	S1
12618-50	3	SL008344	Aldo-keto reductase family 1 member C1	Aldo-keto reductase 1C1	Q04828	1645	AKR1C1	Human	RFU	Protein	20	S1
12619-14	3	SL004719	Protein phosphatase 1A	Protein phophatase 2Ca	P35813	5494	PPM1A	Human	RFU	Protein	20	S2
12620-3	3	SL011301	Septin-11	Septin-11	Q9NVA2	55752	SEPTIN11	Human	RFU	Protein	20	S2
12621-55	3	SL008081	Serine/threonine-protein phosphatase 2A 65 kDa regulatory subunit A alpha isoform	PP2AAA	P30153	5518	PPP2R1A	Human	RFU	Protein	20	S2
12622-96	3	SL019786	Histone-lysine N-methyltransferase ASH1L	ASH1L	Q9NR48	55870	ASH1L	Human	RFU	Protein	20	S1
12623-84	3	SL019793	Protein Jumonji	JARD2	Q92833	3720	JARID2	Human	RFU	Protein	20	S1
12625-138	3	SL019811	Kelch-like protein 7	KLHL7	Q8IXQ5	55975	KLHL7	Human	RFU	Protein	20	S2
12626-6	3	SL019816	Sentrin-specific protease 7	SENP7	Q9BQF6	57337	SENP7	Human	RFU	Protein	20	S1
12627-97	3	SL019821	Ubiquitin-like modifier-activating enzyme ATG7	ATG7	O95352	10533	ATG7	Human	RFU	Protein	20	S2
12628-31	3	SL019826	LanC-like protein 2	LANC2	Q9NS86	55915	LANCL2	Human	RFU	Protein	20	S2
12630-8	3	SL019787	Arfaptin-2	ARFP2	P53365	23647	ARFIP2	Human	RFU	Protein	20	S2
12632-14	3	SL019805	Arylamine N-acetyltransferase 1	ARY1	P18440	9	NAT1	Human	RFU	Protein	20	S2
12633-3	3	SL019812	Tyrosine-protein phosphatase non-receptor type 9	PTN9	P43378	5780	PTPN9	Human	RFU	Protein	20	S1
12634-79	3	SL025804	Breast cancer anti-estrogen resistance protein 3:Guanine Nucleotide Exchange Factor Domain	BCAR3:Ras-GEF	O75815	8412	BCAR3	Human	RFU	Protein	20	S1
12635-9	3	SL019822	tRNA (cytosine(38)-C(5))-methyltransferase	TRDMT	O14717	1787	TRDMT1	Human	RFU	Protein	20	S1
12636-113	3	SL019827	N-lysine methyltransferase SMYD2	SMYD2	Q9NRG4	56950	SMYD2	Human	RFU	Protein	20	S1
12637-7	3	SL019832	Carnitine O-acetyltransferase	CACP	P43155	1384	CRAT	Human	RFU	Protein	20	S1
12641-3	3	SL019813	Type II inositol 1,4,5-trisphosphate 5-phosphatase	I5P2	P32019	3633	INPP5B	Human	RFU	Protein	20	S2
12643-4	3	SL011195	Beta-arrestin-1	ARRB1	P49407	408	ARRB1	Human	RFU	Protein	20	S2
12644-63	3	SL019828	Adenylosuccinate synthetase isozyme 2	PURA2	P30520	159	ADSS2	Human	RFU	Protein	20	S2
12646-2	3	SL013233	Ribulose-phosphate 3-epimerase	RPE	Q96AT9	6120	RPE	Human	RFU	Protein	20	S2
12647-52	3	SL016514	Histone-lysine N-methyltransferase SETD2	SETD2	Q9BYW2	29072	SETD2	Human	RFU	Protein	20	S1
12649-80	3	SL004917	Malate dehydrogenase, mitochondrial	Malate dehydrogenase 2	P40926	4191	MDH2	Human	RFU	Protein	20	S2
12650-43	3	SL008873	Guanine nucleotide-binding protein G(k) subunit alpha	GNAI3	P08754	2773	GNAI3	Human	RFU	Protein	20	S2
12651-21	3	SL019823	[Pyruvate dehydrogenase (acetyl-transferring)] kinase isozyme 2, mitochondrial	PDK2	Q15119	5164	PDK2	Human	RFU	Protein	20	S1
12652-37	3	SL019829	Adenosylhomocysteinase 2	SAHH2	O43865	10768	AHCYL1	Human	RFU	Protein	20	S2
12653-13	3	SL010497	Casein kinase I isoform gamma-2	CSNK1G2	P78368	1455	CSNK1G2	Human	RFU	Protein	20	S1
12655-30	3	SL010994	Beta-soluble NSF attachment protein	SNAB	Q9H115	63908	NAPB	Human	RFU	Protein	20	S2
12656-1	3	SL019807	Kinesin light chain 1	KLC1	Q07866	3831	KLC1	Human	RFU	Protein	20	S1
12657-2	3	SL010919	GDP-L-fucose synthase	FCL	Q13630	7264	TSTA3	Human	RFU	Protein	20	S2
12658-72	3	SL019818	Pantothenate kinase 3	PANK3	Q9H999	79646	PANK3	Human	RFU	Protein	20	S2
12659-13	3	SL008839	Obg-like ATPase 1	GTPB9	Q9NTK5	29789	OLA1	Human	RFU	Protein	20	S2
12661-44	3	SL019788	Gamma-aminobutyric acid receptor-associated protein-like 1	GBRL1	Q9H0R8	23710	GABARAPL1	Human	RFU	Protein	20	S2
12662-82	3	SL004998	Delta(3,5)-Delta(2,4)-dienoyl-CoA isomerase, mitochondrial	ECH1	Q13011	1891	ECH1	Human	RFU	Protein	20	S1
12663-1	3	SL011234	Thiosulfate sulfurtransferase	THTR	Q16762	7263	TST	Human	RFU	Protein	20	S2
12664-19	3	SL014918	Tyrosine-protein phosphatase non-receptor type 13	PTN13	Q12923	5783	PTPN13	Human	RFU	Protein	20	S1
12665-16	3	SL014917	Interleukin enhancer-binding factor 2	ILF2	Q12905	3608	ILF2	Human	RFU	Protein	20	S1
12667-2	3	SL009095	Guanine deaminase	GUAD	Q9Y2T3	9615	GDA	Human	RFU	Protein	20	S2
12668-7	3	SL019834	Vacuolar protein sorting-associated protein 4B	VPS4B	O75351	9525	VPS4B	Human	RFU	Protein	20	S1
12669-30	3	SL019789	E3 ubiquitin-protein ligase HECW1	HECW1	Q76N89	23072	HECW1	Human	RFU	Protein	20	S1
12670-15	3	SL019800	Cell cycle checkpoint protein RAD1	RAD1	O60671	5810	RAD1	Human	RFU	Protein	20	S1
12671-35	3	SL019808	Sulfotransferase family cytosolic 1B member 1	ST1B1	O43704	27284	SULT1B1	Human	RFU	Protein	20	S2
12675-14	3	SL010893	Aspartate--tRNA ligase, cytoplasmic	SYDC	P14868	1615	DARS1	Human	RFU	Protein	20	S2
12676-1	3	SL019835	Protein kinase C and casein kinase substrate in neurons protein 1	PACN1	Q9BY11	29993	PACSIN1	Human	RFU	Protein	20	S1
12677-164	3	SL006530	Protein flightless-1 homolog	FLII	Q13045	2314	FLII	Human	RFU	Protein	20	S2
12678-66	3	SL013011	U1 small nuclear ribonucleoprotein A	SNRPA	P09012	6626	SNRPA	Human	RFU	Protein	20	S2
12681-63	3	SL019819	Ubiquitin carboxyl-terminal hydrolase 21	UBP21	Q9UK80	27005	USP21	Human	RFU	Protein	20	S2
12682-5	3	SL019824	Kynurenine--oxoglutarate transaminase 3	KAT3	Q6YP21	56267	KYAT3	Human	RFU	Protein	20	S2
12683-156	3	SL019830	Dihydropyrimidinase-related protein 5	DPYL5	Q9BPU6	56896	DPYSL5	Human	RFU	Protein	20	S1
12684-5	3	SL019836	Adseverin	ADSV	Q9Y6U3	85477	SCIN	Human	RFU	Protein	20	S2
12685-57	3	SL019790	Homer protein homolog 2	HOME2	Q9NSB8	9455	HOMER2	Human	RFU	Protein	20	S1
12686-15	3	SL008788	3-mercaptopyruvate sulfurtransferase	THTM	P25325	4357	MPST	Human	RFU	Protein	20	S1
12687-2	3	SL008215	2,4-dienoyl-CoA reductase, mitochondrial	DECR	Q16698	1666	DECR1	Human	RFU	Protein	20	S2
12688-115	3	SL019814	Ribosomal protein S6 kinase alpha-6	KS6A6	Q9UK32	27330	RPS6KA6	Human	RFU	Protein	20	S2
12689-56	3	SL011157	Actin-related protein 2/3 complex subunit 1B	ARC1B	O15143	10095	ARPC1B	Human	RFU	Protein	20	S2
12690-33	3	SL019825	Septin-10	2023-09-10	Q9P0V9	151011	SEPTIN10	Human	RFU	Protein	20	S2
12691-44	3	SL015512	Serine hydroxymethyltransferase, mitochondrial	GLYM	P34897	6472	SHMT2	Human	RFU	Protein	20	S2
12692-56	3	SL019837	Histone-lysine N-methyltransferase, H3 lysine-79 specific	DOT1L	Q8TEK3	84444	DOT1L	Human	RFU	Protein	20	S1
12694-28	3	SL019801	Probable dimethyladenosine transferase	DIM1	Q9UNQ2	27292	DIMT1	Human	RFU	Protein	20	S1
12695-62	3	SL019809	Kelch-like protein 12	KLH12	Q53G59	59349	KLHL12	Human	RFU	Protein	20	S1
12696-166	3	SL019815	Protein arginine N-methyltransferase 3	ANM3	O60678	10196	PRMT3	Human	RFU	Protein	20	S1
12697-30	3	SL010809	Phosphatidylinositol 5-phosphate 4-kinase type-2 alpha	PI42A	P48426	5305	PIP4K2A	Human	RFU	Protein	20	S2
12698-72	3	SL006395	Importin subunit alpha-3	IMA4	O00629	3840	KPNA4	Human	RFU	Protein	20	S1
12699-28	3	SL005763	T-complex protein 1 subunit theta	TCP-1-theta	P50990	10694	CCT8	Human	RFU	Protein	20	S2
12700-9	3	SL007279	ATP-citrate synthase	ACLY	P53396	47	ACLY	Human	RFU	Protein	20	S1
12701-1	3	SL019791	Eukaryotic translation initiation factor 1b	EIF1B	O60739	10289	EIF1B	Human	RFU	Protein	20	S2
12702-13	3	SL019802	E3 ubiquitin-protein ligase pellino homolog 2	PELI2	Q9HAT8	57161	PELI2	Human	RFU	Protein	20	S2
12703-6	3	SL019810	Serine/threonine-protein kinase Nek7	NEK7	Q8TDX7	140609	NEK7	Human	RFU	Protein	20	S2
12704-26	3	SL009388	SH2 domain-containing protein 3C	SH2D3	Q8N5H7	10044	SH2D3C	Human	RFU	Protein	20	S2
12705-9	3	SL019820	Probable E3 ubiquitin-protein ligase HERC1	HERC1	Q15751	8925	HERC1	Human	RFU	Protein	20	S1
12706-2	3	SL007478	Serine/threonine-protein kinase MRCK alpha	MRCKA	Q5VT25	8476	CDC42BPA	Human	RFU	Protein	20	S2
12707-26	3	SL008196	Dihydropyrimidinase-related protein 3	DPYL3	Q14195	1809	DPYSL3	Human	RFU	Protein	20	S2
12708-91	3	SL019851	Lethal(3)malignant brain tumor-like protein 2	LMBL2	Q969R5	83746	L3MBTL2	Human	RFU	Protein	20	S1
12709-63	3	SL008266	Histone H1x	H1X	Q92522	8971	H1-10	Human	RFU	Protein	20	S2
12711-19	3	SL007244	Gap junction alpha-8 protein	CXA8	P48165	2703	GJA8	Human	RFU	Protein	20	S1
12712-9	3	SL019881	High mobility group protein 20A	HM20A	Q9NP66	10363	HMG20A	Human	RFU	Protein	20	S1
12713-365	3	SL014816	Regulator of G-protein signaling 19	RGS19	P49795	10287	RGS19	Human	RFU	Protein	20	S2
12714-38	3	SL019896	AP-1 complex subunit gamma-like 2	AP1G2	O75843	8906	AP1G2	Human	RFU	Protein	20	S2
12715-30	3	SL019904	mRNA-decapping enzyme 1B	DCP1B	Q8IZD4	196513	DCP1B	Human	RFU	Protein	20	S1
12716-3	3	SL015364	Zinc finger protein 175	ZN175	Q9Y473	7728	ZNF175	Human	RFU	Protein	20	S1
12717-65	3	SL019861	TOX high mobility group box family member 3	TOX3	O15405	27324	TOX3	Human	RFU	Protein	20	S1
12718-43	3	SL010814	Peptidyl-prolyl cis-trans isomerase NIMA-interacting 4	PIN4	Q9Y237	5303	PIN4	Human	RFU	Protein	20	S2
12720-71	3	SL019882	Ubiquilin-4	UBQL4	Q9NRR5	56893	UBQLN4	Human	RFU	Protein	20	S2
12721-4	3	SL019891	Tax1-binding protein 1	TAXB1	Q86VP1	8887	TAX1BP1	Human	RFU	Protein	20	S2
12724-81	3	SL005468	Cold-inducible RNA-binding protein	CIRBP	Q14011	1153	CIRBP	Human	RFU	Protein	20	S2
12726-3	3	SL019868	Regulatory factor X-associated protein	RFXAP	O00287	5994	RFXAP	Human	RFU	Protein	20	S1
12727-7	3	SL019877	Prostaglandin F2 receptor negative regulator	FPRP	Q9P2B2	5738	PTGFRN	Human	RFU	Protein	20	S2
12729-12	3	SL019892	Proteasome assembly chaperone 3	PSMG3	Q9BT73	84262	PSMG3	Human	RFU	Protein	20	S1
12730-3	3	SL006986	Kinetochore protein NDC80 homolog	KNTC2	O14777	10403	NDC80	Human	RFU	Protein	20	S2
12731-12	3	SL019906	Pleckstrin homology domain-containing family A member 7	PKHA7	Q6IQ23	144100	PLEKHA7	Human	RFU	Protein	20	S1
12732-13	3	SL019852	MAGUK p55 subfamily member 7	MPP7	Q5T2T1	143098	MPP7	Human	RFU	Protein	20	S2
12734-112	3	SL019869	Kinesin-like protein KIF22	KIF22	Q14807	3835	KIF22	Human	RFU	Protein	20	S2
12735-39	3	SL007039	Cold shock domain-containing protein E1	CSDE1	O75534	7812	CSDE1	Human	RFU	Protein	20	S1
12737-12	3	SL015520	Plastin-1	PLSI	Q14651	5357	PLS1	Human	RFU	Protein	20	S1
12738-43	3	SL019897	Nischarin	NISCH	Q9Y2I1	11188	NISCH	Human	RFU	Protein	20	S1
12740-55	3	SL019853	Protein FEV	FEV	Q99581	54738	FEV	Human	RFU	Protein	20	S1
12742-160	3	SL019870	Transmembrane protein 8B	TMM8B	A6NDV4	51754	TMEM8B	Human	RFU	Protein	20	S2
12743-18	3	SL015328	BAG family molecular chaperone regulator 5	BAG5	Q9UL15	9529	BAG5	Human	RFU	Protein	20	S1
12746-4	3	SL019898	Cytohesin-4	CYH4	Q9UIA0	27128	CYTH4	Human	RFU	Protein	20	S2
12747-89	3	SL010231	RNA-binding protein 3	RBM3	P98179	5935	RBM3	Human	RFU	Protein	20	S2
12748-6	3	SL019854	Bromodomain testis-specific protein	BRDT	Q58F21	676	BRDT	Human	RFU	Protein	20	S1
12750-9	3	SL004122	Integrin beta-2	LFA-1 beta-2	P05107	3689	ITGB2	Human	RFU	Protein	20	S1
12751-26	3	SL015327	Zinc fingers and homeoboxes protein 1	ZHX1	Q9UKY1	11244	ZHX1	Human	RFU	Protein	20	S1
12753-6	3	SL025795	Amyloid beta A4 precursor protein-binding family B member 2:Phosphotyrosine Interaction Domain 1	APBB2:PID 1	Q92870	323	APBB2	Human	RFU	Protein	20	S1
12754-14	3	SL019899	Cold shock domain-containing protein C2	CSDC2	Q9Y534	27254	CSDC2	Human	RFU	Protein	20	S2
12756-3	3	SL019855	Transcription regulator protein BACH2	BACH2	Q9BYV9	60468	BACH2	Human	RFU	Protein	20	S1
12758-47	3	SL019871	Glutamate receptor ionotropic, delta-2	GRID2	O43424	2895	GRID2	Human	RFU	Protein	20	S1
12759-47	3	SL004792	Interleukin enhancer-binding factor 3	DRBP76	Q12906	3609	ILF3	Human	RFU	Protein	20	S2
12760-34	3	SL019886	Zinc finger protein 774	ZN774	Q6NX45	342132	ZNF774	Human	RFU	Protein	20	S1
12761-12	3	SL025796	Amyloid beta A4 precursor protein-binding family B member 2:Phosphotyrosine Interaction Domain 2	APBB2:PID 2	Q92870	323	APBB2	Human	RFU	Protein	20	S2
12763-69	3	SL019908	Zinc finger protein 334	ZN334	Q9HCZ1	55713	ZNF334	Human	RFU	Protein	20	S1
12764-3	3	SL019856	Engulfment and cell motility protein 1	ELMO1	Q92556	9844	ELMO1	Human	RFU	Protein	20	S2
12766-33	3	SL019872	Probable G-protein coupled receptor 142	GP142	Q7Z601	350383	GPR142	Human	RFU	Protein	20	S1
12768-3	3	SL019887	Protein phosphatase 1 regulatory subunit 3B	PPR3B	Q86XI6	79660	PPP1R3B	Human	RFU	Protein	20	S1
12771-19	3	SL011309	Zinc finger protein 180	ZN180	Q9UJW8	7733	ZNF180	Human	RFU	Protein	20	S1
12772-8	3	SL019857	Nuclear pore complex protein Nup98-Nup96	NUP98	P52948	4928	NUP98	Human	RFU	Protein	20	S2
12774-12	3	SL019873	Potassium/sodium hyperpolarization-activated cyclic nucleotide-gated channel 1	HCN1	O60741	348980	HCN1	Human	RFU	Protein	20	S1
12775-6	3	SL006995	High mobility group protein B3	HMGB3	O15347	3149	HMGB3	Human	RFU	Protein	20	S2
12777-11	3	SL013086	Splicing factor 1	SF01	Q15637	7536	SF1	Human	RFU	Protein	20	S1
12781-2	3	SL014970	RISC-loading complex subunit TARBP2	TRBP2	Q15633	6895	TARBP2	Human	RFU	Protein	20	S1
12783-29	3	SL008807	Heterogeneous nuclear ribonucleoprotein M	HNRPM	P52272	4670	HNRNPM	Human	RFU	Protein	20	S2
12784-10	3	SL025797	Amyloid beta A4 precursor protein-binding family B member 3:Phosphotyrosine Interaction Domain 1,Isoform II	APBB3:PID 1	O95704	10307	APBB3	Human	RFU	Protein	20	S2
12785-49	3	SL009382	Transcriptional regulator Kaiso	KAISO	Q86T24	10009	ZBTB33	Human	RFU	Protein	20	S1
12786-61	3	SL015257	Glycerophosphocholine phosphodiesterase GPCPD1	GDE5	Q9NPB8	56261	GPCPD1	Human	RFU	Protein	20	S2
12787-47	3	SL014834	Zinc finger protein 134	ZN134	P52741	7693	ZNF134	Human	RFU	Protein	20	S1
12788-6	3	SL019859	SAGA-associated factor 29 homolog	SGF29	Q96ES7	112869	SGF29	Human	RFU	Protein	20	S1
12790-10	3	SL019874	Coiled-coil domain-containing protein 51	CCD51	Q96ER9	79714	CCDC51	Human	RFU	Protein	20	S1
12793-4	3	SL019894	Piwi-like protein 1	PIWL1	Q96J94	9271	PIWIL1	Human	RFU	Protein	20	S1
12794-6	3	SL019902	NACHT, LRR and PYD domains-containing protein 4	NALP4	Q96MN2	147945	NLRP4	Human	RFU	Protein	20	S1
12795-2	3	SL019910	Zinc finger protein 566	ZN566	Q969W8	84924	ZNF566	Human	RFU	Protein	20	S1
12796-44	3	SL019860	Diphosphoinositol polyphosphate phosphohydrolase 1	NUDT3	O95989	11165	NUDT3	Human	RFU	Protein	20	S2
12798-46	3	SL019875	Electroneutral sodium bicarbonate exchanger 1	S4A8	Q2Y0W8	9498	SLC4A8	Human	RFU	Protein	20	S1
12799-65	3	SL019880	DnaJ homolog subfamily C member 27	DJC27	Q9NZQ0	51277	DNAJC27	Human	RFU	Protein	20	S1
12800-5	3	SL019890	Tubulin polymerization-promoting protein family member 2	TPPP2	P59282	122664	TPPP2	Human	RFU	Protein	20	S2
12801-33	3	SL019895	Interferon regulatory factor 2	IRF2	P14316	3660	IRF2	Human	RFU	Protein	20	S2
12803-9	3	SL019911	Zinc finger protein 329	ZN329	Q86UD4	79673	ZNF329	Human	RFU	Protein	20	S1
12804-5	3	SL019919	Glucocorticoid modulatory element-binding protein 2	GMEB2	Q9UKD1	26205	GMEB2	Human	RFU	Protein	20	S2
12807-89	3	SL019940	Rho GTPase-activating protein 30	RHG30	Q7Z6I6	257106	ARHGAP30	Human	RFU	Protein	20	S2
12808-103	3	SL013301	Calcium-regulated heat-stable protein 1	CHSP1	Q9Y2V2	23589	CARHSP1	Human	RFU	Protein	20	S2
12811-55	3	SL019912	Zinc finger protein 415	ZN415	Q09FC8	55786	ZNF415	Human	RFU	Protein	20	S1
12812-25	3	SL009425	Acylphosphatase-2	ACYP2	P14621	98	ACYP2	Human	RFU	Protein	20	S2
12813-18	3	SL006654	EH domain-binding protein 1	EHBP1	Q8NDI1	23301	EHBP1	Human	RFU	Protein	20	S1
12814-17	3	SL019933	RNA-binding protein 40	RBM40	Q96LT9	55599	RNPC3	Human	RFU	Protein	20	S1
12815-9	3	SL008104	Isoleucine--tRNA ligase, cytoplasmic	SYIC	P41252	3376	IARS1	Human	RFU	Protein	20	S1
12817-1	3	SL019954	GTP-binding protein GEM	GEM	P55040	2669	GEM	Human	RFU	Protein	20	S2
12818-159	3	SL019965	Urea transporter 2	UT2	Q15849	8170	SLC14A2	Human	RFU	Protein	20	S2
12820-1	3	SL019920	GRB2-related adapter protein	GRAP	Q13588	10750	GRAP	Human	RFU	Protein	20	S1
12821-6	3	SL019926	NACHT, LRR and PYD domains-containing protein 10	NAL10	Q86W26	338322	NLRP10	Human	RFU	Protein	20	S1
12822-34	3	SL025793	Amyloid beta A4 precursor protein-binding family B member 1:Phosphotyrosine Interaction Domain 1	APBB1:PID 1	O00213	322	APBB1	Human	RFU	Protein	20	S1
12825-18	3	SL019955	DCC-interacting protein 13-alpha	DP13A	Q9UKG1	26060	APPL1	Human	RFU	Protein	20	S2
12826-5	3	SL019966	Sodium/iodide cotransporter	SC5A5	Q92911	6528	SLC5A5	Human	RFU	Protein	20	S1
12827-37	3	SL014817	Regulator of G-protein signaling 3	RGS3	P49796	5998	RGS3	Human	RFU	Protein	20	S1
12830-4	3	SL019934	Histone deacetylase complex subunit SAP18	SAP18	O00422	10284	SAP18	Human	RFU	Protein	20	S2
12831-21	3	SL015132	Calcineurin B homologous protein 3	TESC	Q96BS2	54997	TESC	Human	RFU	Protein	20	S2
12832-10	3	SL019949	Set1/Ash2 histone methyltransferase complex subunit ASH2	ASH2L	Q9UBL3	9070	ASH2L	Human	RFU	Protein	20	S1
12834-3	3	SL019967	Potassium voltage-gated channel subfamily F member 1	KCNF1	Q9H3M0	3754	KCNF1	Human	RFU	Protein	20	S1
12835-101	3	SL019914	Pyrin domain-containing protein 1	PYDC1	Q8WXC3	260434	PYDC1	Human	RFU	Protein	20	S1
12838-28	3	SL019935	Dual specificity protein phosphatase 15	DUS15	Q9H1R2	128853	DUSP15	Human	RFU	Protein	20	S1
12842-43	3	SL019968	Syntaxin-10	STX10	O60499	8677	STX10	Human	RFU	Protein	20	S2
12843-6	3	SL019915	Zinc finger protein 410	ZN410	Q86VK4	57862	ZNF410	Human	RFU	Protein	20	S1
12844-10	3	SL006067	BAG family molecular chaperone regulator 4	BAG4	O95429	9530	BAG4	Human	RFU	Protein	20	S1
12845-18	3	SL011225	Sorting nexin-17	SNX17	Q15036	9784	SNX17	Human	RFU	Protein	20	S2
12846-3	3	SL019936	F-box/LRR-repeat protein 5	FBXL5	Q9UKA1	26234	FBXL5	Human	RFU	Protein	20	S1
12847-27	3	SL019942	mRNA-capping enzyme	MCE1	O60942	8732	RNGTT	Human	RFU	Protein	20	S1
12848-9	3	SL019951	Rho guanine nucleotide exchange factor 2	ARHG2	Q92974	9181	ARHGEF2	Human	RFU	Protein	20	S2
12849-25	3	SL019958	GSK3-beta interaction protein	GSKIP	Q9P0R6	51527	GSKIP	Human	RFU	Protein	20	S1
12851-5	3	SL019921	DNA-directed DNA/RNA polymerase mu	DPOLM	Q9NP87	27434	POLM	Human	RFU	Protein	20	S1
12853-112	3	SL019937	Tropomodulin-2	TMOD2	Q9NZR1	29767	TMOD2	Human	RFU	Protein	20	S2
12854-3	3	SL019943	Transcriptional enhancer factor TEF-5	TEAD3	Q99594	7005	TEAD3	Human	RFU	Protein	20	S1
12855-16	3	SL011299	Cas scaffolding protein family member 4	CT032	Q9NQ75	57091	CASS4	Human	RFU	Protein	20	S2
12856-14	3	SL019959	Transmembrane protein 237	TM237	Q96Q45	65062	TMEM237	Human	RFU	Protein	20	S1
12859-33	3	SL007038	Enoyl-CoA delta isomerase 2, mitochondrial	PECI	O75521	10455	ECI2	Human	RFU	Protein	20	S1
12860-7	3	SL006617	cAMP-regulated phosphoprotein 21	cAMP-regulated phosphoprotein 21	Q9UBL0	10777	ARPP21	Human	RFU	Protein	20	S1
12861-13	3	SL006759	Tropomodulin-3	TMOD3	Q9NYL9	29766	TMOD3	Human	RFU	Protein	20	S2
12862-14	3	SL014945	Enhancer of filamentation 1	CASL	Q14511	4739	NEDD9	Human	RFU	Protein	20	S1
12864-9	3	SL019960	Magnesium transporter NIPA4	NIPA4	Q0D2K0	348938	NIPAL4	Human	RFU	Protein	20	S1
12867-40	3	SL019922	Dynein light chain Tctex-type 3	DYLT3	P51808	6990	DYNLT3	Human	RFU	Protein	20	S2
12869-68	3	SL019938	Probable ATP-dependent RNA helicase DDX6	DDX6	P26196	1656	DDX6	Human	RFU	Protein	20	S2
12871-10	3	SL013078	Twinfilin-1	TWF1	Q12792	5756	TWF1	Human	RFU	Protein	20	S1
12872-35	3	SL019961	Cyclic nucleotide-gated olfactory channel	CNGA2	Q16280	1260	CNGA2	Human	RFU	Protein	20	S1
12873-11	3	SL007131	Leukosialin	LEUK	P16150	6693	SPN	Human	RFU	Protein	20	S1
12875-28	3	SL019923	Ubiquitin domain-containing protein 2	UBTD2	Q8WUN7	92181	UBTD2	Human	RFU	Protein	20	S2
12876-39	3	SL007787	Sperm flagellar protein 1	SPEF1	Q9Y4P9	25876	SPEF1	Human	RFU	Protein	20	S1
12878-60	3	SL019944	Oxysterol-binding protein-related protein 11	OSB11	Q9BXB4	114885	OSBPL11	Human	RFU	Protein	20	S2
12879-5	3	SL003759	Retinoblastoma-like protein 1	p107	P28749	5933	RBL1	Human	RFU	Protein	20	S1
12880-1	3	SL019962	Synaptic vesicle glycoprotein 2A	SV2A	Q7L0J3	9900	SV2A	Human	RFU	Protein	20	S1
12881-17	3	SL019970	Retinol dehydrogenase 16	RDH16	O75452	8608	RDH16	Human	RFU	Protein	20	S2
12882-7	3	SL019918	Poly [ADP-ribose] polymerase 11	PAR11	Q9NR21	57097	PARP11	Human	RFU	Protein	20	S2
12885-42	3	SL007432	Nuclear receptor subfamily 1 group D member 2	NR1D2	Q14995	9975	NR1D2	Human	RFU	Protein	20	S1
12888-18	3	SL012382	Histone deacetylase complex subunit SAP30	SAP30	O75446	8819	SAP30	Human	RFU	Protein	20	S2
12891-1	3	SL019924	MICAL-like protein 2	MILK2	Q8IY33	79778	MICALL2	Human	RFU	Protein	20	S1
12892-10	3	SL019931	Synaptotagmin-like protein 1	SYTL1	Q8IYJ3	84958	SYTL1	Human	RFU	Protein	20	S1
12893-159	3	SL025892	Gamma-interferon-inducible protein 16:Isoform 2, Hematopoietic expression, interferon-inducible nature, and nuclear localization 2	IP16:HIN 2	Q16666	3428	IFI16	Human	RFU	Protein	20	S2
12894-3	3	SL019946	PAX-interacting protein 1	PAXI1	Q6ZW49	22976	PAXIP1	Human	RFU	Protein	20	S1
12895-28	3	SL019952	Diacylglycerol kinase beta	DGKB	Q9Y6T7	1607	DGKB	Human	RFU	Protein	20	S1
12904-180	3	SL004440	cubilin	cubilin	O60494	8029	CUBN	Human	RFU	Protein	20	S1
12916-3	3	SL019344	Protein p13 MTCP-1	MTCP1	P56278	4515	MTCP1	Human	RFU	Protein	20	S1
12923-51	3	SL005401	Keratin, type I cytoskeletal 17	Keratin 17	Q04695	3872	KRT17	Human	RFU	Protein	20	S1
12925-105	3	SL018508	Axin-2	AXIN2	Q9Y2T1	8313	AXIN2	Human	RFU	Protein	20	S2
12931-16	3	SL007088	Mineralocorticoid receptor	MCR	P08235	4306	NR3C2	Human	RFU	Protein	20	S2
12934-1	3	SL015312	E3 ISG15--protein ligase HERC5	HERC5	Q9UII4	51191	HERC5	Human	RFU	Protein	20	S2
12936-38	3	SL019347	Retinaldehyde-binding protein 1	RLBP1	P12271	6017	RLBP1	Human	RFU	Protein	20	S2
12939-1	3	SL019437	DNA-directed RNA polymerases I and III subunit RPAC1	RPAC1	O15160	9533	POLR1C	Human	RFU	Protein	20	S2
12940-35	3	SL010891	Aldehyde dehydrogenase family 3 member B1	AL3B1	P43353	221	ALDH3B1	Human	RFU	Protein	20	S2
12945-33	3	SL013869	Ras-related protein Rab-18	RAB18	Q9NP72	22931	RAB18	Human	RFU	Protein	20	S2
12954-71	3	SL005257	Peroxisome proliferator-activated receptor alpha	PPARa	Q07869	5465	PPARA	Human	RFU	Protein	20	S2
12956-40	3	SL019438	KIF1-binding protein	KBP	Q96EK5	26128	KIFBP	Human	RFU	Protein	20	S2
12957-62	3	SL008041	Cytochrome b-c1 complex subunit 7	UCR6	P14927	7381	UQCRB	Human	RFU	Protein	20	S1
12960-9	3	SL007208	Glucokinase	HXK4	P35557	2645	GCK	Human	RFU	Protein	20	S2
12963-1	3	SL015007	Protein GPR107	GP107	Q5VW38	57720	GPR107	Human	RFU	Protein	20	S1
12968-2	3	SL008213	Cysteine and glycine-rich protein 2	CSRP2	Q16527	1466	CSRP2	Human	RFU	Protein	20	S2
12970-35	3	SL007715	Double-stranded RNA-binding protein Staufen homolog 2	STAU2	Q9NUL3	27067	STAU2	Human	RFU	Protein	20	S1
12975-11	3	SL002694	Keratin, type I cytoskeletal 20	Keratin 20	P35900	54474	KRT20	Human	RFU	Protein	20	S1
12976-49	3	SL001913	Vinexin b	Vinexin b	O60504	10174	SORBS3	Human	RFU	Protein	20	S1
12980-31	3	SL019459	Pre-mRNA-splicing factor RBM22	RBM22	Q9NW64	55696	RBM22	Human	RFU	Protein	20	S1
12986-12	3	SL019466	Protein lin-7 homolog C	LIN7C	Q9NUP9	55327	LIN7C	Human	RFU	Protein	20	S1
12987-12	3	SL019472	Serine/arginine-rich splicing factor 7	SRSF7	Q16629	6432	SRSF7	Human	RFU	Protein	20	S2
12988-49	3	SL007342	RNA-binding protein EWS	EWS	Q01844	2130	EWSR1	Human	RFU	Protein	20	S2
12990-39	3	SL005017	Mitogen-activated protein kinase kinase kinase 3	MAP3K3	Q99759	4215	MAP3K3	Human	RFU	Protein	20	S2
12991-49	3	SL019483	Cullin-9	CUL9	Q8IWT3	23113	CUL9	Human	RFU	Protein	20	S1
12993-21	3	SL016487	Nuclear protein localization protein 4 homolog	NPL4	Q8TAT6	55666	NPLOC4	Human	RFU	Protein	20	S2
13007-66	3	SL012574	Epididymal-specific lipocalin-10	LCN10	Q6JVE6	414332	LCN10	Human	RFU	Protein	20	S2
13013-41	3	SL019524	E3 ubiquitin-protein ligase parkin	PRKN2	O60260	5071	PRKN	Human	RFU	Protein	20	S1
13022-20	3	SL019515	Tumor protein p53-inducible protein 11	P5I11	O14683	9537	TP53I11	Human	RFU	Protein	20	S2
13025-4	3	SL019541	Fibroblast growth factor receptor substrate 2	FRS2	Q8WU20	10818	FRS2	Human	RFU	Protein	20	S1
13027-20	3	SL019531	Chromobox protein homolog 7	CBX7	O95931	23492	CBX7	Human	RFU	Protein	20	S1
13032-1	3	SL014943	Beclin-1	BECN1	Q14457	8678	BECN1	Human	RFU	Protein	20	S1
13039-1	3	SL019546	Nuclear inhibitor of protein phosphatase 1	PP1R8	Q12972	5511	PPP1R8	Human	RFU	Protein	20	S2
13041-47	3	SL007634	TNF receptor-associated factor 4	TRAF4	Q9BUZ4	9618	TRAF4	Human	RFU	Protein	20	S1
13042-7	3	SL019583	Potassium voltage-gated channel subfamily A member 10	KCA10	Q16322	3744	KCNA10	Human	RFU	Protein	20	S2
13043-157	3	SL007491	ATPase family AAA domain-containing protein 2	ATAD2	Q6PL18	29028	ATAD2	Human	RFU	Protein	20	S1
13044-5	3	SL007627	Tumor susceptibility gene 101 protein	TS101	Q99816	7251	TSG101	Human	RFU	Protein	20	S2
13053-6	3	SL015342	Sodium- and chloride-dependent neutral and basic amino acid transporter B(0+)	S6A14	Q9UN76	11254	SLC6A14	Human	RFU	Protein	20	S1
13054-87	3	SL008767	Profilin-2	Profilin II	P35080	5217	PFN2	Human	RFU	Protein	20	S2
13055-53	3	SL019564	PH and SEC7 domain-containing protein 1	PSD1	A5PKW4	5662	PSD	Human	RFU	Protein	20	S1
13056-18	3	SL019585	Orphan sodium- and chloride-dependent neurotransmitter transporter NTT5	S6A16	Q9GZN6	28968	SLC6A16	Human	RFU	Protein	20	S1
13059-33	3	SL019557	Riboflavin kinase	RIFK	Q969G6	55312	RFK	Human	RFU	Protein	20	S2
13062-4	3	SL016378	Glia maturation factor gamma	GMFG	O60234	9535	GMFG	Human	RFU	Protein	20	S2
13066-42	3	SL015023	Enhancer of mRNA-decapping protein 4	EDC4	Q6P2E9	23644	EDC4	Human	RFU	Protein	20	S2
13067-5	3	SL009424	cGMP-dependent protein kinase 1, beta isozyme	KGP1B	Q13976	5592	PRKG1	Human	RFU	Protein	20	S2
13073-14	3	SL019559	Acidic leucine-rich nuclear phosphoprotein 32 family member A	AN32A	P39687	8125	ANP32A	Human	RFU	Protein	20	S2
13076-4	3	SL018149	Fragile X mental retardation syndrome-related protein 1	FXR1	P51114	8087	FXR1	Human	RFU	Protein	20	S2
13078-3	3	SL014793	Centrin-2	CETN2	P41208	1069	CETN2	Human	RFU	Protein	20	S2
13082-9	3	SL011294	Protein unc-45 homolog A	UN45A	Q9H3U1	55898	UNC45A	Human	RFU	Protein	20	S1
13083-18	3	SL013025	Valine--tRNA ligase	SYVC	P26640	7407	VARS1	Human	RFU	Protein	20	S2
13085-18	3	SL025874	Glucagon-like peptide 1 receptor:Cytoplasmic domain	GLP1R:CD	P43220	2740	GLP1R	Human	RFU	Protein	20	S1
13088-397	3	SL000137	Betacellulin	BTC	P35070	685	BTC	Human	RFU	Protein	20	S1
13089-6	3	SL003349	Hypoxia-inducible factor 1-alpha	HIF-1a	Q16665	3091	HIF1A	Human	RFU	Protein	20	S1
13090-17	3	SL004827	Protein S100-A6	S100A6	P06703	6277	S100A6	Human	RFU	Protein	20	S2
13093-6	3	SL005430	Secreted and transmembrane protein 1	SECTM1	Q8WVN6	6398	SECTM1	Human	RFU	Protein	20	S2
13094-75	3	SL018509	R-spondin-3	RSPO3	Q9BXY4	84870	RSPO3	Human	RFU	Protein	20	S2
13095-51	3	SL005357	Lithostathine-1-alpha	PSP	P05451	5967	REG1A	Human	RFU	Protein	20	S2
13097-11	3	SL003774	Bcl-2-like protein 2	Apoptosis regulator Bcl-W	Q92843	599	BCL2L2	Human	RFU	Protein	20	S1
13098-93	3	SL003320	Vascular endothelial growth factor D	VEGF-D	O43915	2277	VEGFD	Human	RFU	Protein	20	S2
13101-60	3	SL007631	Sclerostin	SOST	Q9BQB4	50964	SOST	Human	RFU	Protein	20	S1
13102-1	3	SL012769	Protein FAM3D	FAM3D	Q96BQ1	131177	FAM3D	Human	RFU	Protein	20	S2
13103-125	3	SL009328	Chorionic somatomammotropin hormone	CSH	P0DML2|P0DML3	1442|1442	CSH1|CSH2	Human	RFU	Protein	20	S2
13104-32	3	SL008614	Ephrin-B1	EFNB1	P98172	1947	EFNB1	Human	RFU	Protein	20	S2
13105-7	3	SL007311	Synaptosomal-associated protein 25	SNP25	P60880	6616	SNAP25	Human	RFU	Protein	20	S1
13107-9	3	SL008402	Ly6/PLAUR domain-containing protein 3	LYPD3	O95274	27076	LYPD3	Human	RFU	Protein	20	S1
13109-82	3	SL008810	Neuronal growth regulator 1	NEGR1	Q7Z3B1	257194	NEGR1	Human	RFU	Protein	20	S2
13112-179	3	SL009349	Follistatin-related protein 1	FSTL1	Q12841	11167	FSTL1	Human	RFU	Protein	20	S3
13113-7	3	SL002688	Osteopontin	Osteopontin	P10451	6696	SPP1	Human	RFU	Protein	20	S2
13114-50	3	SL006230	Lumican	Lumican	P51884	4060	LUM	Human	RFU	Protein	20	S2
13116-25	3	SL008931	CD177 antigen	CD177	Q8N6Q3	57126	CD177	Human	RFU	Protein	20	S2
13117-232	3	SL018256	Choline/ethanolamine kinase	CHKB	Q9Y259	1120	CHKB	Human	RFU	Protein	20	S2
13118-5	3	SL011888	SPARC-related modular calcium-binding protein 1	SMOC1	Q9H4F8	64093	SMOC1	Human	RFU	Protein	20	S2
13119-26	3	SL004467	Protein Z-dependent protease inhibitor	protein Z inhibitor	Q9UK55	51156	SERPINA10	Human	RFU	Protein	20	S2
13122-19	3	SL008360	Leucine-rich repeat transmembrane protein FLRT2	FLRT2	O43155	23768	FLRT2	Human	RFU	Protein	20	S2
13123-3	3	SL025865	Leucine-rich repeat transmembrane protein FLRT3:Extracellular domain	FLRT3:ECD	Q9NZU0	23767	FLRT3	Human	RFU	Protein	20	S2
13124-20	3	SL018587	Immunoglobulin superfamily containing leucine-rich repeat protein 2	ISLR2	Q6UXK2	57611	ISLR2	Human	RFU	Protein	20	S2
13125-45	3	SL000616	Vitronectin	Vitronectin	P04004	7448	VTN	Human	RFU	Protein	20	S2
13126-52	3	SL008631	Desmocollin-2	DSC2	Q02487	1824	DSC2	Human	RFU	Protein	20	S2
13129-40	3	SL007070	Low-density lipoprotein receptor	LDLR	P01130	3949	LDLR	Human	RFU	Protein	20	S1
13130-150	3	SL007272	Hexokinase-2	HXK2	P52789	3099	HK2	Human	RFU	Protein	20	S2
13131-5	3	SL011180	Hexokinase-1	HXK1	P19367	3098	HK1	Human	RFU	Protein	20	S1
13132-14	3	SL008522	Semaphorin-5A	SEM5A	Q13591	9037	SEMA5A	Human	RFU	Protein	20	S2
13133-73	3	SL007033	Latent-transforming growth factor beta-binding protein 4	LTBP4	Q8N2S1	8425	LTBP4	Human	RFU	Protein	20	S2
13228-75	3	SL001999	E3 ubiquitin-protein ligase Mdm2	MDM2	Q00987	4193	MDM2	Human	RFU	Protein	20	S1
13229-20	3	SL019996	Protein Mdm4	MDM4	O15151	4194	MDM4	Human	RFU	Protein	20	S1
13230-174	3	SL019999	Ig gamma-2, Kappa	IgG2, Kappa	P01859	3501	IGHG2	Human	RFU	Protein	20	S2
13231-90	3	SL020001	Ig gamma-4, Kappa	IgG4, Kappa	P01861	3503	IGHG4	Human	RFU	Protein	20	S2
13236-25	3	SL012449	Protein Wnt-3a	WNT3A	P56704	89780	WNT3A	Human	RFU	Protein	20	S1
13240-170	3	SL019993	SH3 and multiple ankyrin repeat domains protein 1	SHAN1	Q9Y566	50944	SHANK1	Human	RFU	Protein	20	S1
13242-134	3	SL019995	SH3 and multiple ankyrin repeat domains protein 3	SHAN3	Q9BYB0		SHANK3	Human	RFU	Protein	20	S2
13256-21	3	SL019993	SH3 and multiple ankyrin repeat domains protein 1	SHAN1	Q9Y566	50944	SHANK1	Human	RFU	Protein	20	S1
13268-45	3	SL012434	Protein Wnt-5a	WNT5A	P41221	7474	WNT5A	Human	RFU	Protein	20	S1
13374-4	3	SL012530	Beta-defensin 113	DB113	Q30KQ7	245927	DEFB113	Human	RFU	Protein	20	S2
13375-48	3	SL020085	Synaptogyrin-3	SNG3	O43761	9143	SYNGR3	Human	RFU	Protein	20	S1
13377-3	3	SL020095	Cytochrome b561 domain-containing protein 1	C56D1	Q8N8Q1	284613	CYB561D1	Human	RFU	Protein	20	S2
13378-80	3	SL020102	Glutaredoxin-like protein C5orf63	YD286	A6NC05	401207	C5orf63	Human	RFU	Protein	20	S1
13381-49	3	SL008831	Beta-1,4-galactosyltransferase 1	B4GT1	P15291	2683	B4GALT1	Human	RFU	Protein	20	S2
13384-110	3	SL008015	Fumarate hydratase, mitochondrial	FUMH	P07954	2271	FH	Human	RFU	Protein	20	S2
13386-248	3	SL020103	E3 ubiquitin-protein ligase RNF34	RNF34	Q969K3	80196	RNF34	Human	RFU	Protein	20	S1
13387-55	3	SL015293	ETS homologous factor	EHF	Q9NZC4	26298	EHF	Human	RFU	Protein	20	S1
13388-57	3	SL012430	Neuroendocrine convertase 1	NEC1	P29120	5122	PCSK1	Human	RFU	Protein	20	S2
13392-13	3	SL008814	Sodium/potassium-transporting ATPase subunit beta-1	AT1B1	P05026	481	ATP1B1	Human	RFU	Protein	20	S2
13393-46	3	SL015189	Derlin-1	DERL1	Q9BUN8	79139	DERL1	Human	RFU	Protein	20	S2
13399-33	3	SL020071	RELT-like protein 1	RELL1	Q8IUW5	768211	RELL1	Human	RFU	Protein	20	S1
13403-5	3	SL013779	ETS translocation variant 5	ETV5	P41161	2119	ETV5	Human	RFU	Protein	20	S1
13405-61	3	SL012422	Serine protease inhibitor Kazal-type 2	ISK2	P20155	6691	SPINK2	Human	RFU	Protein	20	S2
13406-161	3	SL014270	CMRF35-like molecule 6	CLM6	Q08708	10871	CD300C	Human	RFU	Protein	20	S1
13408-23	3	SL010391	WAP, Kazal, immunoglobulin, Kunitz and NTR domain-containing protein 2	WFKN2	Q8TEU8	124857	WFIKKN2	Human	RFU	Protein	20	S2
13411-21	3	SL020111	E3 ubiquitin-protein ligase NRDP1	RNF41	Q9H4P4	10193	RNF41	Human	RFU	Protein	20	S1
13412-5	3	SL012556	WAP four-disulfide core domain protein 6	WFDC6	Q9BQY6	140870	WFDC6	Human	RFU	Protein	20	S1
13416-8	3	SL020086	Transmembrane protein 132D	T132D	Q14C87	121256	TMEM132D	Human	RFU	Protein	20	S2
13421-17	3	SL020080	Protein kish-B	KISHB	Q9NRX6	56900	TMEM167B	Human	RFU	Protein	20	S1
13422-66	3	SL012509	Ecto-NOX disulfide-thiol exchanger 2	ENOX2	Q16206	10495	ENOX2	Human	RFU	Protein	20	S1
13423-94	3	SL008291	Redox-regulatory protein FAM213A	CJ058	Q9BRX8	84293	PRXL2A	Human	RFU	Protein	20	S1
13427-66	3	SL008941	Mannosyl-oligosaccharide 1,2-alpha-mannosidase IC	MA1C1	Q9NR34	57134	MAN1C1	Human	RFU	Protein	20	S2
13429-3	3	SL012827	WAP four-disulfide core domain protein 10A	WF10A	Q9H1F0	140832	WFDC10A	Human	RFU	Protein	20	S2
13430-50	3	SL010851	Urea transporter 1	UT1	Q13336	6563	SLC14A1	Human	RFU	Protein	20	S1
13431-74	3	SL020092	Membrane protein FAM159A	F159A	Q6UWV7	348378	SHISAL2A	Human	RFU	Protein	20	S1
13432-9	3	SL026028	Protrudin:Cytoplasmic domain, region 1, isoform 6	ZFY27:CD region 1	Q5T4F4	118813	ZFYVE27	Human	RFU	Protein	20	S1
13434-172	3	SL008312	Alpha-parvin	PARVA	Q9NVD7	55742	PARVA	Human	RFU	Protein	20	S2
13435-31	3	SL005182	Interleukin-20 receptor subunit beta	IL-20 Rb	Q6UXL0	53833	IL20RB	Human	RFU	Protein	20	S1
13436-54	3	SL020077	Myc-associated zinc finger protein	MAZ	P56270	4150	MAZ	Human	RFU	Protein	20	S2
13438-115	3	SL007661	Chordin	CHRD	Q9H2X0	8646	CHRD	Human	RFU	Protein	20	S2
13439-6	3	SL020093	IQ domain-containing protein F3	IQCF3	P0C7M6	401067	IQCF3	Human	RFU	Protein	20	S1
13441-30	3	SL020107	Dixin	DIXC1	Q155Q3	85458	DIXDC1	Human	RFU	Protein	20	S1
13447-42	3	SL020094	Shadow of prion protein	SPRN	Q5BIV9	503542	SPRN	Human	RFU	Protein	20	S2
13449-25	3	SL020108	Splicing factor 3B subunit 4	SF3B4	Q15427	10262	SF3B4	Human	RFU	Protein	20	S1
13450-49	3	SL020113	Ubiquitin carboxyl-terminal hydrolase 8	UBP8	P40818	9101	USP8	Human	RFU	Protein	20	S2
13451-2	3	SL006734	Fibronectin type III domain-containing protein 4	FNDC4	Q9H6D8	64838	FNDC4	Human	RFU	Protein	20	S2
13452-113	3	SL020075	Small integral membrane protein 13	SIM13	P0DJ93	221710	SMIM13	Human	RFU	Protein	20	S1
13453-2	3	SL020083	39S ribosomal protein L33, mitochondrial	RM33	O75394	9553	MRPL33	Human	RFU	Protein	20	S1
13457-33	3	SL020109	ETS-related transcription factor Elf-5	ELF5	Q9UKW6	2001	ELF5	Human	RFU	Protein	20	S1
13459-30	3	SL016531	Torsin-4A	CI167	Q9NXH8	54863	TOR4A	Human	RFU	Protein	20	S1
13460-4	3	SL012363	Chondroadherin	CHAD	O15335	1101	CHAD	Human	RFU	Protein	20	S2
13463-1	3	SL007573	Peroxidasin homolog	PXDN	Q92626	7837	PXDN	Human	RFU	Protein	20	S1
13464-8	3	SL020101	Nutritionally-regulated adipose and cardiac enriched protein homolog	NRAC	Q8N912	400258	NRAC	Human	RFU	Protein	20	S1
13465-5	3	SL007283	Calcipressin-1	CCP1	P53805	1827	RCAN1	Human	RFU	Protein	20	S1
13468-5	3	SL020119	Neuralized-like protein 4	NEUL4	Q96JN8	84461	NEURL4	Human	RFU	Protein	20	S2
13470-43	3	SL014902	Parathyroid hormone/parathyroid hormone-related peptide receptor	PTH1R	Q03431	5745	PTH1R	Human	RFU	Protein	20	S1
13472-35	3	SL016517	Haloacid dehalogenase-like hydrolase domain-containing protein 2	HDHD2	Q9H0R4	84064	HDHD2	Human	RFU	Protein	20	S2
13473-55	3	SL020131	Inositol-trisphosphate 3-kinase A	IP3KA	P23677	3706	ITPKA	Human	RFU	Protein	20	S1
13474-40	3	SL011317	Glutathione S-transferase kappa 1	GSTK1	Q9Y2Q3	373156	GSTK1	Human	RFU	Protein	20	S1
13475-10	3	SL020116	Ubiquitin-conjugating enzyme E2 D4	UB2D4	Q9Y2X8	51619	UBE2D4	Human	RFU	Protein	20	S2
13476-16	3	SL020144	DNA/RNA-binding protein KIN17	KIN17	O60870	22944	KIN	Human	RFU	Protein	20	S2
13477-65	3	SL007448	Leukotriene B4 receptor 1	LT4R1	Q15722	1241	LTB4R	Human	RFU	Protein	20	S2
13479-8	3	SL020149	Protein FAM171A2	F1712	A8MVW0	284069	FAM171A2	Human	RFU	Protein	20	S1
13481-24	3	SL020143	Transcription elongation factor A protein 2	TCEA2	Q15560	6919	TCEA2	Human	RFU	Protein	20	S1
13482-14	3	SL020129	CCR4-NOT transcription complex subunit 1	CNOT1	A5YKK6	23019	CNOT1	Human	RFU	Protein	20	S2
13484-69	3	SL025820	Collagen alpha-1(I) chain:N-term propeptide	CO1A1:N-term propeptide	P02452	1277	COL1A1	Human	RFU	Protein	20	S1
13485-20	3	SL020165	Transmembrane protein 87B	TM87B	Q96K49	84910	TMEM87B	Human	RFU	Protein	20	S2
13486-9	3	SL025961	Polycystin-2:Cytoplasmic domain 1	PKD2:CD 1	Q13563	5311	PKD2	Human	RFU	Protein	20	S1
13487-24	3	SL020148	Protein unc-93 homolog B1	UN93B	Q9H1C4	81622	UNC93B1	Human	RFU	Protein	20	S2
13488-3	3	SL020128	Arfaptin-1	ARFP1	P53367	27236	ARFIP1	Human	RFU	Protein	20	S2
13490-1	3	SL020136	MAGUK p55 subfamily member 6	MPP6	Q9NZW5	51678	MPP6	Human	RFU	Protein	20	S2
13491-40	3	SL020117	Retinal rod rhodopsin-sensitive cGMP 3',5'-cyclic phosphodiesterase subunit delta	PDE6D	O43924	5147	PDE6D	Human	RFU	Protein	20	S1
13492-44	3	SL005768	Stress-70 protein, mitochondrial	HSPA9B	P38646	3313	HSPA9	Human	RFU	Protein	20	S2
13493-5	3	SL020164	Glutamate receptor ionotropic, delta-1	GRID1	Q9ULK0	2894	GRID1	Human	RFU	Protein	20	S1
13494-6	3	SL020154	Ceramide synthase 5	CERS5	Q8N5B7	91012	CERS5	Human	RFU	Protein	20	S1
13495-48	3	SL020147	Hydroxycarboxylic acid receptor 2	HCAR2	Q8TDS4	338442	HCAR2	Human	RFU	Protein	20	S2
13496-19	3	SL020125	Hydroxymethylglutaryl-CoA synthase, cytoplasmic	HMCS1	Q01581	3157	HMGCS1	Human	RFU	Protein	20	S1
13497-34	3	SL020138	Eukaryotic translation initiation factor 3 subunit J	EIF3J	O75822	8669	EIF3J	Human	RFU	Protein	20	S1
13498-1	3	SL020130	Inositol oxygenase	MIOX	Q9UGB7	55586	MIOX	Human	RFU	Protein	20	S1
13499-30	3	SL000359	Coagulation Factor VIII	Coagulation Factor VIII	P00451	2157	F8	Human	RFU	Protein	20	S2
13501-10	3	SL020163	Solute carrier family 35 member G2	S35G2	Q8TBE7	80723	SLC35G2	Human	RFU	Protein	20	S2
13502-2	3	SL020153	Sodium-independent sulfate anion transporter	S2611	Q86WA9	284129	SLC26A11	Human	RFU	Protein	20	S1
13503-19	3	SL007985	PRA1 family protein 3	PRAF3	O75915	10550	ARL6IP5	Human	RFU	Protein	20	S2
13504-147	3	SL013259	Heterogeneous nuclear ribonucleoprotein R	HNRPR	O43390	10236	HNRNPR	Human	RFU	Protein	20	S2
13506-10	3	SL020145	tRNA-dihydrouridine(20) synthase [NAD(P)+]-like	DUS2L	Q9NX74	54920	DUS2	Human	RFU	Protein	20	S1
13509-5	3	SL020162	Secretory carrier-associated membrane protein 5	SCAM5	Q8TAC9	192683	SCAMP5	Human	RFU	Protein	20	S1
13510-7	3	SL011088	Sarcoplasmic/endoplasmic reticulum calcium ATPase 3	AT2A3	Q93084	489	ATP2A3	Human	RFU	Protein	20	S2
13511-29	3	SL009828	DNA-binding protein SATB1	SATB1	Q01826	6304	SATB1	Human	RFU	Protein	20	S1
13512-28	3	SL013259	Heterogeneous nuclear ribonucleoprotein R	HNRPR	O43390	10236	HNRNPR	Human	RFU	Protein	20	S1
13513-174	3	SL020133	E3 SUMO-protein ligase PIAS3	PIAS3	Q9Y6X2	10401	PIAS3	Human	RFU	Protein	20	S1
13515-8	3	SL020146	Regulation of nuclear pre-mRNA domain-containing protein 1A	RPR1A	Q96P16	55197	RPRD1A	Human	RFU	Protein	20	S1
13516-46	3	SL016509	ER membrane protein complex subunit 4	TMM85	Q5J8M3	51234	EMC4	Human	RFU	Protein	20	S2
13517-3	3	SL020152	Patched domain-containing protein 3	PTHD3	Q3KNS1	374308	PTCHD3	Human	RFU	Protein	20	S1
13518-5	3	SL014608	Arf-GAP with SH3 domain, ANK repeat and PH domain-containing protein 2	ASAP2	O43150	8853	ASAP2	Human	RFU	Protein	20	S2
13519-112	3	SL020123	Rho guanine nucleotide exchange factor 25	ARHGP	Q86VW2	115557	ARHGEF25	Human	RFU	Protein	20	S1
13522-20	3	SL007318	Visinin-like protein 1	VISL1	P62760	7447	VSNL1	Human	RFU	Protein	20	S2
13524-25	3	SL020161	Heparan-sulfate 6-O-sulfotransferase 2	H6ST2	Q96MM7	90161	HS6ST2	Human	RFU	Protein	20	S1
13525-17	3	SL020151	Potassium voltage-gated channel subfamily G member 4	KCNG4	Q8TDN1	93107	KCNG4	Human	RFU	Protein	20	S1
13526-5	3	SL025914	Lupus La protein:RNA recognition motif	LA:RRM	P05455	6741	SSB	Human	RFU	Protein	20	S2
13529-39	3	SL020132	Nucleosome assembly protein 1-like 2	NP1L2	Q9ULW6	4674	NAP1L2	Human	RFU	Protein	20	S2
13530-5	3	SL020120	Urotensin-2 receptor	UR2R	Q9UKP6	2837	UTS2R	Human	RFU	Protein	20	S1
13532-25	3	SL020160	Nuclear envelope phosphatase-regulatory subunit 1	NEPR1	Q8N9A8	255919	CNEP1R1	Human	RFU	Protein	20	S1
13534-20	3	SL008132	Myomesin-2	MYOM2	P54296	9172	MYOM2	Human	RFU	Protein	20	S1
13535-2	3	SL025805	Collagen type IV alpha-3-binding protein:PH domain	C43BP:PH domain	Q9Y5P4	10087	CERT1	Human	RFU	Protein	20	S2
13536-56	3	SL020124	DNA polymerase iota	POLI	Q9UNA4	11201	POLI	Human	RFU	Protein	20	S1
13539-131	3	SL020168	Small conductance calcium-activated potassium channel protein 1	KCNN1	Q92952	3780	KCNN1	Human	RFU	Protein	20	S1
13540-1	3	SL020159	G-protein coupled receptor 26	GPR26	Q8NDV2	2849	GPR26	Human	RFU	Protein	20	S1
13541-1	3	SL016488	Myc target protein 1	MYCT1	Q8N699	80177	MYCT1	Human	RFU	Protein	20	S1
13543-7	3	SL005407	Prostaglandin reductase 1	LTB4DH	Q14914	22949	PTGR1	Human	RFU	Protein	20	S1
13544-9	3	SL011276	Rho GTPase-activating protein 45	HMHA1	Q92619	23526	ARHGAP45	Human	RFU	Protein	20	S2
13545-97	3	SL013206	Probable RNA-binding protein EIF1AD	EIF1A	Q8N9N8	84285	EIF1AD	Human	RFU	Protein	20	S1
13547-5	3	SL019581	5-hydroxytryptamine receptor 7	5HT7R	P34969	3363	HTR7	Human	RFU	Protein	20	S2
13548-53	3	SL020158	Phosphatidate phosphatase PPAPDC1A	PPC1A	Q5VZY2	196051	PLPP4	Human	RFU	Protein	20	S1
13549-15	3	SL020150	Disintegrin and metalloproteinase domain-containing protein 29	ADA29	Q9UKF5	11086	ADAM29	Human	RFU	Protein	20	S1
13552-7	3	SL010879	Switch-associated protein 70	SWP70	Q9UH65	23075	SWAP70	Human	RFU	Protein	20	S2
13553-4	3	SL020126	DCN1-like protein 3	DCNL3	Q8IWE4	123879	DCUN1D3	Human	RFU	Protein	20	S1
13554-78	3	SL020118	Replication initiator 1	REPI1	Q9BWE0	29803	REPIN1	Human	RFU	Protein	20	S1
13556-28	3	SL020157	5-hydroxytryptamine receptor 2A	5HT2A	P28223	3356	HTR2A	Human	RFU	Protein	20	S1
13557-3	3	SL004802	Nectin-3	Nectin 3	Q9NQS3	25945	NECTIN3	Human	RFU	Protein	20	S1
13561-5	3	SL020176	5-hydroxytryptamine receptor 6	5HT6R	P50406	3362	HTR6	Human	RFU	Protein	20	S1
13563-259	3	SL020184	Acyl-CoA-binding domain-containing protein 7	ACBD7	Q8N6N7	414149	ACBD7	Human	RFU	Protein	20	S2
13565-2	3	SL003760	Retinoblastoma-like protein 2	p130	Q08999	5934	RBL2	Human	RFU	Protein	20	S2
13566-2	3	SL020204	RNA polymerase II subunit A C-terminal domain phosphatase SSU72	SSU72	Q9NP77	29101	SSU72	Human	RFU	Protein	20	S2
13568-30	3	SL011203	26S proteasome non-ATPase regulatory subunit 4	PSMD4	P55036	5710	PSMD4	Human	RFU	Protein	20	S2
13570-43	3	SL008163	Vigilin	VIGLN	Q00341	3069	HDLBP	Human	RFU	Protein	20	S1
13572-43	3	SL010941	26S proteasome non-ATPase regulatory subunit 11	PSD11	O00231	5717	PSMD11	Human	RFU	Protein	20	S2
13573-5	3	SL004616	Actin-related protein 2/3 complex subunit 3	p21-ARC	O15145	10094	ARPC3	Human	RFU	Protein	20	S2
13574-50	3	SL020205	Rho-related GTP-binding protein Rho6	RND1	Q92730	27289	RND1	Human	RFU	Protein	20	S1
13575-40	3	SL020209	Segment polarity protein dishevelled homolog DVL-2	DVL2	O14641	1856	DVL2	Human	RFU	Protein	20	S2
13576-15	3	SL003643	Glutathione S-transferase P	Glutathione S-transferase Pi	P09211	2950	GSTP1	Human	RFU	Protein	20	S2
13577-25	3	SL017896	Splicing factor U2AF 65 kDa subunit	U2AF2	P26368	11338	U2AF2	Human	RFU	Protein	20	S2
13578-98	3	SL020134	Actin-binding LIM protein 3	ABLM3	O94929	22885	ABLIM3	Human	RFU	Protein	20	S1
13580-2	3	SL009232	UDP-N-acetylhexosamine pyrophosphorylase	Sperm-associated antigen 2	Q16222	6675	UAP1	Human	RFU	Protein	20	S1
13583-19	3	SL003661	Apoptotic protease-activating factor 1	Apaf-1	O14727	317	APAF1	Human	RFU	Protein	20	S2
13587-10	3	SL005989	Rac GTPase-activating protein 1	RGAP1	Q9H0H5	29127	RACGAP1	Human	RFU	Protein	20	S2
13588-11	3	SL020193	Annexin A9	ANXA9	O76027	8416	ANXA9	Human	RFU	Protein	20	S1
13589-10	3	SL025798	Amyloid beta A4 precursor protein-binding family B member 3:Phosphotyrosine Interaction Domain 2, Isoform IV	APBB3:PID 2	O95704	10307	APBB3	Human	RFU	Protein	20	S2
13590-1	3	SL020207	Oligoribonuclease, mitochondrial	ORN	Q9Y3B8	25996	REXO2	Human	RFU	Protein	20	S2
13591-31	3	SL020210	DNA primase small subunit	PRI1	P49642	5557	PRIM1	Human	RFU	Protein	20	S1
13594-158	3	SL020181	ADP-ribosylation factor-binding protein GGA1	GGA1	Q9UJY5	26088	GGA1	Human	RFU	Protein	20	S2
13595-20	3	SL020185	Thiamine-triphosphatase	THTPA	Q9BU02	79178	THTPA	Human	RFU	Protein	20	S2
13596-3	3	SL006957	Ras-related protein Rab-27B	RB27B	O00194	5874	RAB27B	Human	RFU	Protein	20	S1
13597-20	3	SL014934	Ras-related protein Rab-31	RAB31	Q13636	11031	RAB31	Human	RFU	Protein	20	S2
13599-15	3	SL020211	Rab9 effector protein with kelch motifs	RABEK	Q7Z6M1	10244	RABEPK	Human	RFU	Protein	20	S1
13602-6	3	SL013050	NHP2-like protein 1	NH2L1	P55769	4809	SNU13	Human	RFU	Protein	20	S2
13603-7	3	SL020186	Rieske domain-containing protein	RFESD	Q8TAC1	317671	RFESD	Human	RFU	Protein	20	S2
13604-27	3	SL020194	E3 ubiquitin-protein ligase NEURL1	NEUL1	O76050	9148	NEURL1	Human	RFU	Protein	20	S1
13605-16	3	SL015314	Annexin A10	ANX10	Q9UJ72	11199	ANXA10	Human	RFU	Protein	20	S2
13609-11	3	SL007326	General transcription factor II-I	GTF2I	P78347	2969	GTF2I	Human	RFU	Protein	20	S2
13610-9	3	SL005065	Melanoma-associated antigen 10	MAGE-10	P43363	4109	MAGEA10	Human	RFU	Protein	20	S2
13612-7	3	SL020195	Cytohesin-interacting protein	CYTIP	O60759	9595	CYTIP	Human	RFU	Protein	20	S1
13613-23	3	SL005741	Adenylate kinase isoenzyme 5	Adenylate kinase isoenzyme 5	Q9Y6K8	26289	AK5	Human	RFU	Protein	20	S1
13615-60	3	SL007010	Cytoplasmic protein NCK2	NCK2	O43639	8440	NCK2	Human	RFU	Protein	20	S2
13618-15	3	SL015381	Mitotic spindle assembly checkpoint protein MAD1	MD1L1	Q9Y6D9	8379	MAD1L1	Human	RFU	Protein	20	S2
13620-10	3	SL016377	ATPase ASNA1	ASNA	O43681	439	GET3	Human	RFU	Protein	20	S2
13621-31	3	SL020199	AP-2 complex subunit alpha-2	AP2A2	O94973	161	AP2A2	Human	RFU	Protein	20	S2
13622-16	3	SL014961	Serine/threonine-protein phosphatase 2A 56 kDa regulatory subunit alpha isoform	2A5A	Q15172	5525	PPP2R5A	Human	RFU	Protein	20	S2
13623-4	3	SL007956	Histone-lysine N-methyltransferase 2D	MLL2	O14686	8085	KMT2D	Human	RFU	Protein	20	S2
13624-17	3	SL020213	NAD kinase	NADK	O95544	65220	NADK	Human	RFU	Protein	20	S2
13625-19	3	SL025915	Lupus La protein:HTH La-type RNA-binding domain	LA:HTH	P05455	6741	SSB	Human	RFU	Protein	20	S1
13628-58	3	SL020196	Growth factor receptor-bound protein 14	GRB14	Q14449	2888	GRB14	Human	RFU	Protein	20	S2
13629-25	3	SL020200	Cysteine protease ATG4B	ATG4B	Q9Y4P1	23192	ATG4B	Human	RFU	Protein	20	S2
13631-1	3	SL003766	Retinoblastoma-binding protein 5	RB binding protein 5	Q15291	5929	RBBP5	Human	RFU	Protein	20	S2
13632-10	3	SL009456	Zyxin	Zyxin	Q15942	7791	ZYX	Human	RFU	Protein	20	S2
13634-209	3	SL006975	Pirin	PIR	O00625	8544	PIR	Human	RFU	Protein	20	S2
13636-20	3	SL008135	Nucleosome assembly protein 1-like 1	NP1L1	P55209	4673	NAP1L1	Human	RFU	Protein	20	S2
13639-101	3	SL016380	General vesicular transport factor p115	USO1	O60763	8615	USO1	Human	RFU	Protein	20	S1
13640-5	3	SL007223	B-cell lymphoma 6 protein	BCL6	P41182	604	BCL6	Human	RFU	Protein	20	S1
13642-90	3	SL004393	Interferon-induced protein with tetratricopeptide repeats 3	CIG49	O14879	3437	IFIT3	Human	RFU	Protein	20	S2
13644-30	3	SL016371	Hepatocyte growth factor-regulated tyrosine kinase substrate	HGS	O14964	9146	HGS	Human	RFU	Protein	20	S1
13645-14	3	SL020202	Pre-mRNA-splicing factor ATP-dependent RNA helicase PRP16	PRP16	Q92620	9785	DHX38	Human	RFU	Protein	20	S1
13650-11	3	SL020183	Kv channel-interacting protein 1	KCIP1	Q9NZI2	30820	KCNIP1	Human	RFU	Protein	20	S2
13651-54	3	SL020192	E3 ubiquitin-protein ligase ZFP91	ZFP91	Q96JP5	80829	ZFP91	Human	RFU	Protein	20	S1
13652-2	3	SL020197	TOM1-like protein 1	TM1L1	O75674	10040	TOM1L1	Human	RFU	Protein	20	S2
13653-335	3	SL020203	O-acetyl-ADP-ribose deacetylase MACROD1	MACD1	Q9BQ69	28992	MACROD1	Human	RFU	Protein	20	S2
13654-1	3	SL005370	Rho-associated protein kinase 2	ROCK2	O75116	9475	ROCK2	Human	RFU	Protein	20	S1
13655-34	3	SL005695	Nucleolin	Nucleolin	P19338	4691	NCL	Human	RFU	Protein	20	S2
13657-2	3	SL007610	Bifunctional polynucleotide phosphatase/kinase	PNKP	Q96T60	11284	PNKP	Human	RFU	Protein	20	S2
13658-31	3	SL011071	Platelet-derived growth factor C	PDGF-CC	Q9NRA1	56034	PDGFC	Human	RFU	Protein	20	S2
13659-36	3	SL020228	Manganese-transporting ATPase 13A1	AT131	Q9HD20	57130	ATP13A1	Human	RFU	Protein	20	S2
13660-76	3	SL001996	Angiopoietin-2	Angiopoietin-2	O15123	285	ANGPT2	Human	RFU	Protein	20	S2
13661-193	3	SL008382	Cystatin-D	CYTD	P28325	1473	CST5	Human	RFU	Protein	20	S1
13663-2	3	SL000480	Interleukin-4	IL-4	P05112	3565	IL4	Human	RFU	Protein	20	S1
13665-35	3	SL004990	Serine/threonine-protein phosphatase 2A regulatory subunit B'' subunit alpha	PP2A, subunit B	Q06190	5523	PPP2R3A	Human	RFU	Protein	20	S1
13666-222	3	SL010449	Carbonic anhydrase-related protein 10	Carbonic Anhydrase X	Q9NS85	56934	CA10	Human	RFU	Protein	20	S2
13668-44	3	SL004136	Tyrosine-protein kinase receptor TYRO3	Dtk	Q06418	7301	TYRO3	Human	RFU	Protein	20	S2
13669-6	3	SL025861	Fibroblast growth factor receptor 3:Extracellular domain	FGFR-3:ECD	P22607	2261	FGFR3	Human	RFU	Protein	20	S2
13670-81	3	SL004066	Group IIE secretory phospholipase A2	GIIE	Q9NZK7	30814	PLA2G2E	Human	RFU	Protein	20	S1
13671-40	3	SL000401	Neutrophil elastase	Elastase	P08246	1991	ELANE	Human	RFU	Protein	20	S2
13672-3	3	SL013017	Heat shock 70 kDa protein 6	HSP76	P17066	3310	HSPA6	Human	RFU	Protein	20	S1
13673-21	3	SL008288	T-complex protein 1 subunit eta	TCPH	Q99832	10574	CCT7	Human	RFU	Protein	20	S2
13676-46	3	SL001933	Inhibin beta B chain	Inhibin bB chain	P09529	3625	INHBB	Human	RFU	Protein	20	S2
13678-169	3	SL003327	Complement factor D	Factor D	P00746	1675	CFD	Human	RFU	Protein	20	S2
13680-3	3	SL020216	NGFI-A-binding protein 2	NAB2	Q15742	4665	NAB2	Human	RFU	Protein	20	S1
13681-173	3	SL013751	Casein kinase II subunit alpha'	CSK22	P19784	1459	CSNK2A2	Human	RFU	Protein	20	S1
13682-47	3	SL004153	Macrophage colony-stimulating factor 1 receptor	M-CSF R	P07333	1436	CSF1R	Human	RFU	Protein	20	S3
13686-2	3	SL005188	Interleukin-5 receptor subunit alpha	IL-5 Ra	Q01344	3568	IL5RA	Human	RFU	Protein	20	S1
13687-5	3	SL003176	C-C motif chemokine 1	I-309	P22362	6346	CCL1	Human	RFU	Protein	20	S2
13688-2	3	SL020217	Calcyphosin-like protein	CAPSL	Q8WWF8	133690	CAPSL	Human	RFU	Protein	20	S1
13689-2	3	SL003670	Ornithine decarboxylase	Ornithine decarboxylase	P11926	4953	ODC1	Human	RFU	Protein	20	S2
13690-26	3	SL007804	Biglycan	BGN	P21810	633	BGN	Human	RFU	Protein	20	S2
13691-10	3	SL020232	Sodium-coupled monocarboxylate transporter 1	SC5A8	Q8N695	160728	SLC5A8	Human	RFU	Protein	20	S2
13692-154	3	SL004689	WNT1-inducible-signaling pathway protein 1	WISP-1	O95388	8840	CCN4	Human	RFU	Protein	20	S2
13693-5	3	SL012538	Cerebral dopamine neurotrophic factor	ARMEL	Q49AH0	441549	CDNF	Human	RFU	Protein	20	S1
13694-24	3	SL005226	Cytokine receptor-like factor 2	TSLP R	Q9HC73	64109	CRLF2	Human	RFU	Protein	20	S1
13697-51	3	SL007151	Glycerol-3-phosphate dehydrogenase [NAD(+)], cytoplasmic	GPDA	P21695	2819	GPD1	Human	RFU	Protein	20	S2
13698-28	3	SL020223	Dyslexia-associated protein KIAA0319-like protein	K319L	Q8IZA0	79932	KIAA0319L	Human	RFU	Protein	20	S1
13699-6	3	SL000062	Prostate-specific antigen	PSA	P07288	354	KLK3	Human	RFU	Protein	20	S1
13700-10	3	SL004209	Annexin A2	annexin II	P07355	302	ANXA2	Human	RFU	Protein	20	S2
13701-2	3	SL003167	C-X-C motif chemokine 13	BLC	O43927	10563	CXCL13	Human	RFU	Protein	20	S1
13704-5	3	SL014847	Hydroxymethylglutaryl-CoA synthase, mitochondrial	HMCS2	P54868	3158	HMGCS2	Human	RFU	Protein	20	S1
13706-12	3	SL004148	Interleukin-12 receptor subunit beta-1	IL-12 Rb1	P42701	3594	IL12RB1	Human	RFU	Protein	20	S1
13707-27	3	SL005488	SPARC-like protein 1	SPARCL1	Q14515	8404	SPARCL1	Human	RFU	Protein	20	S2
13708-56	3	SL003915	Kallikrein-8	kallikrein 8	O60259	11202	KLK8	Human	RFU	Protein	20	S2
13710-6	3	SL000308	Plasma protease C1 inhibitor	C1-Esterase Inhibitor	P05155	710	SERPING1	Human	RFU	Protein	20	S2
13711-10	3	SL008164	Clathrin heavy chain 1	CLH1	Q00610	1213	CLTC	Human	RFU	Protein	20	S2
13712-104	3	SL004298	Granzyme A	granzyme A	P12544	3001	GZMA	Human	RFU	Protein	20	S2
13717-15	3	SL006542	Ficolin-2	FCN2	Q15485	2220	FCN2	Human	RFU	Protein	20	S2
13719-19	3	SL020219	Serine/threonine-protein kinase PAK 4	PAK4	O96013	10298	PAK4	Human	RFU	Protein	20	S2
13720-95	3	SL004008	Myeloblastin	Proteinase-3	P24158	5657	PRTN3	Human	RFU	Protein	20	S2
13722-105	3	SL000325	Complement component C9	C9	P02748	735	C9	Human	RFU	Protein	20	S3
13723-6	3	SL001717	Interleukin-10	IL-10	P22301	3586	IL10	Human	RFU	Protein	20	S2
13724-27	3	SL004337	Fibroblast growth factor 19	FGF-19	O95750	9965	FGF19	Human	RFU	Protein	20	S2
13725-3	3	SL004334	Fibroblast growth factor 16	FGF-16	O43320	8823	FGF16	Human	RFU	Protein	20	S1
13726-4	3	SL003738	T-lymphocyte activation antigen CD80	B7	P33681	941	CD80	Human	RFU	Protein	20	S1
13727-44	3	SL020220	Speckle-type POZ protein	SPOP	O43791	8405	SPOP	Human	RFU	Protein	20	S1
13728-19	3	SL003522	Endoplasmic reticulum resident protein 29	ERP29	P30040	10961	ERP29	Human	RFU	Protein	20	S2
13729-26	3	SL020226	Sideroflexin-5	SFXN5	Q8TD22	94097	SFXN5	Human	RFU	Protein	20	S1
13730-18	3	SL007280	Dipeptidyl peptidase 1	CATC	P53634	1075	CTSC	Human	RFU	Protein	20	S2
13731-14	3	SL000323	Complement component C7	C7	P10643	730	C7	Human	RFU	Protein	20	S3
13732-79	3	SL002783	Cardiotrophin-1	Cardiotrophin-1	Q16619	1489	CTF1	Human	RFU	Protein	20	S2
13733-5	3	SL004250	Interleukin-12 subunit beta	IL-12 p40	P29460	3593	IL12B	Human	RFU	Protein	20	S1
13734-22	3	SL004348	Interferon lambda-1	IFN-lambda 1	Q8IU54	282618	IFNL1	Human	RFU	Protein	20	S1
13735-1	3	SL020221	Rap1 GTPase-activating protein 1	RPGP1	P47736	5909	RAP1GAP	Human	RFU	Protein	20	S1
13738-8	3	SL001932	Inhibin beta A chain	Inhibin bA chain	P08476	3624	INHBA	Human	RFU	Protein	20	S2
13739-3	3	SL014071	Leucine-rich repeat transmembrane protein FLRT1	FLRT1	Q9NZU1	23769	FLRT1	Human	RFU	Protein	20	S1
13740-51	3	SL004650	Secreted frizzled-related protein 3	sFRP-3	Q92765	2487	FRZB	Human	RFU	Protein	20	S2
13741-36	3	SL000462	Insulin-like growth factor-binding protein 1	IGFBP-1	P08833	3484	IGFBP1	Human	RFU	Protein	20	S2
13742-66	3	SL004347	Interleukin-22	IL-22	Q9GZX6	50616	IL22	Human	RFU	Protein	20	S2
13743-56	3	SL020222	Cullin-4B	CUL4B	Q13620	8450	CUL4B	Human	RFU	Protein	20	S1
13744-37	3	SL005187	Interleukin-3 receptor subunit alpha	IL-3 Ra	P26951	3563	IL3RA	Human	RFU	Protein	20	S2
13745-10	3	SL025962	Polycystin-2:Cytoplasmic domain 4	PKD2:CD 4	Q13563	5311	PKD2	Human	RFU	Protein	20	S1
13747-9	3	SL010288	Carbonic anhydrase 6	Carbonic anhydrase 6	P23280	765	CA6	Human	RFU	Protein	20	S1
13748-4	3	SL000515	C-C motif chemokine 8	MCP-2	P80075	6355	CCL8	Human	RFU	Protein	20	S1
13924-13	3	SL018834	Myocardial zonula adherens protein	MYZAP	P0CAP1	100820829	MYZAP	Human	RFU	Protein	20	S1
13926-1	3	SL020268	RecQ-mediated genome instability protein 1	RMI1	Q9H9A7	80010	RMI1	Human	RFU	Protein	20	S1
13929-27	3	SL020289	Peroxisomal carnitine O-octanoyltransferase	OCTC	Q9UKG9	54677	CROT	Human	RFU	Protein	20	S1
13930-3	3	SL007678	DNA dC->dU-editing enzyme APOBEC-3G	ABC3G	Q9HC16	60489	APOBEC3G	Human	RFU	Protein	20	S1
13931-22	3	SL012980	26S proteasome non-ATPase regulatory subunit 9	PSMD9	O00233	5715	PSMD9	Human	RFU	Protein	20	S2
13932-45	3	SL005746	Rho guanine nucleotide exchange factor 7	COOL-1	Q14155	8874	ARHGEF7	Human	RFU	Protein	20	S1
13933-276	3	SL020257	NGFI-A-binding protein 1	NAB1	Q13506	4664	NAB1	Human	RFU	Protein	20	S2
13934-3	3	SL014593	Guanine nucleotide exchange factor DBS	MCF2L	O15068	23263	MCF2L	Human	RFU	Protein	20	S1
13936-24	3	SL020280	Phosphoglycerate kinase 2	PGK2	P07205	5232	PGK2	Human	RFU	Protein	20	S1
13937-75	3	SL008246	Cullin-associated NEDD8-dissociated protein 1	CAND1	Q86VP6	55832	CAND1	Human	RFU	Protein	20	S2
13939-14	3	SL006519	UTP--glucose-1-phosphate uridylyltransferase	UGPA1	Q16851	7360	UGP2	Human	RFU	Protein	20	S2
13940-19	3	SL025893	Gamma-interferon-inducible protein 16:Isoform 2, Hematopoietic expression, interferon-inducible nature, and nuclear localization 1	IP16:HIN 1	Q16666	3428	IFI16	Human	RFU	Protein	20	S2
13941-82	3	SL020259	Phenylalanine--tRNA ligase, mitochondrial	SYFM	O95363	10667	FARS2	Human	RFU	Protein	20	S2
13942-140	3	SL020269	SPRY domain-containing SOCS box protein 1	SPSB1	Q96BD6	80176	SPSB1	Human	RFU	Protein	20	S1
13943-38	3	SL020276	Protein dpy-30 homolog	DPY30	Q9C005	84661	DPY30	Human	RFU	Protein	20	S2
13944-3	3	SL000578	Sulfotransferase 1A3	SULT 1A3	P0DMM9	445329	SULT1A3	Human	RFU	Protein	20	S1
13946-8	3	SL020297	Probable ATP-dependent RNA helicase DDX23	DDX23	Q9BUQ8	9416	DDX23	Human	RFU	Protein	20	S2
13947-371	3	SL020301	Peroxisomal NADH pyrophosphatase NUDT12	NUD12	Q9BQG2	83594	NUDT12	Human	RFU	Protein	20	S1
13948-50	3	SL025871	Gamma-aminobutyric acid type B receptor subunit 2:Extracellular domain	GABR2:ECD	O75899	9568	GABBR2	Human	RFU	Protein	20	S2
13950-9	3	SL025806	Collagen type IV alpha-3-binding protein:StAR-related lipid-transfer domain, isoform 2	C43BP:START domain	Q9Y5P4	10087	CERT1	Human	RFU	Protein	20	S2
13954-9	3	SL020298	Glucosamine 6-phosphate N-acetyltransferase	GNA1	Q96EK6	64841	GNPNAT1	Human	RFU	Protein	20	S2
13955-33	3	SL007277	Death-associated protein kinase 1	DAPK1	P53355	1612	DAPK1	Human	RFU	Protein	20	S2
13958-5	3	SL020270	Probable RNA-binding protein 46	RBM46	Q8TBY0	166863	RBM46	Human	RFU	Protein	20	S1
13959-7	3	SL000499	Cytosol aminopeptidase	LAP	P28838	51056	LAP3	Human	RFU	Protein	20	S2
13960-15	3	SL020282	Arf-GAP with GTPase, ANK repeat and PH domain-containing protein 3	AGAP3	Q96P47	116988	AGAP3	Human	RFU	Protein	20	S1
13961-18	3	SL020291	Kinesin-like protein KIF3A	KIF3A	Q9Y496	11127	KIF3A	Human	RFU	Protein	20	S2
13963-7	3	SL004521	Toll-interacting protein	tollip	Q9H0E2	54472	TOLLIP	Human	RFU	Protein	20	S2
13966-30	3	SL008254	Myomesin-3	MYOM3	Q5VTT5	127294	MYOM3	Human	RFU	Protein	20	S1
13967-14	3	SL005724	Thioredoxin reductase 1, cytoplasmic	Thioredoxin reductase 1	Q16881	7296	TXNRD1	Human	RFU	Protein	20	S2
13969-24	3	SL020292	Importin subunit alpha-7	IMA7	O60684	23633	KPNA6	Human	RFU	Protein	20	S1
13972-4	3	SL020263	17-beta-hydroxysteroid dehydrogenase 14	DHB14	Q9BPX1	51171	HSD17B14	Human	RFU	Protein	20	S1
13973-62	3	SL020271	Tubulin--tyrosine ligase	TTL	Q8NG68	150465	TTL	Human	RFU	Protein	20	S1
13975-56	3	SL020284	Liprin-alpha-1	LIPA1	Q13136	8500	PPFIA1	Human	RFU	Protein	20	S1
13976-9	3	SL015120	Rho guanine nucleotide exchange factor 1	ARHG1	Q92888	9138	ARHGEF1	Human	RFU	Protein	20	S2
13977-28	3	SL015168	BRCA1-associated RING domain protein 1	BARD1	Q99728	580	BARD1	Human	RFU	Protein	20	S1
13978-122	3	SL004696	T-box transcription factor TBX3	Tbx3	O15119	6926	TBX3	Human	RFU	Protein	20	S1
13979-3	3	SL020254	Anion exchange transporter	S26A7	Q8TE54	115111	SLC26A7	Human	RFU	Protein	20	S1
13982-33	3	SL016529	Regulator of G-protein signaling 18	RGS18	Q9NS28	64407	RGS18	Human	RFU	Protein	20	S1
13983-27	3	SL008181	Quinone oxidoreductase	QOR	Q08257	1429	CRYZ	Human	RFU	Protein	20	S1
13984-23	3	SL020293	ATP-dependent RNA helicase DDX25	DDX25	Q9UHL0	29118	DDX25	Human	RFU	Protein	20	S1
13985-12	3	SL007669	E3 ubiquitin-protein ligase SMURF2	SMUF2	Q9HAU4	64750	SMURF2	Human	RFU	Protein	20	S1
13986-6	3	SL010800	LanC-like protein 1	LANC1	O43813	10314	LANCL1	Human	RFU	Protein	20	S2
13988-67	3	SL020265	NmrA-like family domain-containing protein 1	NMRL1	Q9HBL8	57407	NMRAL1	Human	RFU	Protein	20	S2
13990-1	3	SL003652	Pyruvate carboxylase, mitochondrial	pyruvate carboxylase	P11498	5091	PC	Human	RFU	Protein	20	S1
13991-47	3	SL020285	Eukaryotic translation initiation factor 4 gamma 3	IF4G3	O43432	8672	EIF4G3	Human	RFU	Protein	20	S1
13992-12	3	SL007239	Vesicle-fusing ATPase	NSF	P46459	4905	NSF	Human	RFU	Protein	20	S2
13993-20	3	SL020300	Band 4.1-like protein 1	E41L1	Q9H4G0	2036	EPB41L1	Human	RFU	Protein	20	S2
13994-1	3	SL020302	rRNA 2'-O-methyltransferase fibrillarin	FBRL	P22087	2091	FBL	Human	RFU	Protein	20	S1
13996-16	3	SL020266	Phosphopantothenoylcysteine decarboxylase	COAC	Q96CD2	60490	PPCDC	Human	RFU	Protein	20	S1
13998-26	3	SL020277	Adenylosuccinate synthetase isozyme 1	PURA1	Q8N142	122622	ADSS1	Human	RFU	Protein	20	S1
14002-18	3	SL020303	Dedicator of cytokinesis protein 9	DOCK9	Q9BZ29	23348	DOCK9	Human	RFU	Protein	20	S1
14005-2	3	SL008319	Chromodomain-helicase-DNA-binding protein 7	CHD7	Q9P2D1	55636	CHD7	Human	RFU	Protein	20	S1
14006-36	3	SL020278	Glycine N-methyltransferase	GNMT	Q14749	27232	GNMT	Human	RFU	Protein	20	S1
14007-22	3	SL020287	Bifunctional 3'-phosphoadenosine 5'-phosphosulfate synthase 1	PAPS1	O43252	9061	PAPSS1	Human	RFU	Protein	20	S1
14008-22	3	SL020295	mRNA-decapping enzyme 1A	DCP1A	Q9NPI6	55802	DCP1A	Human	RFU	Protein	20	S1
14009-65	3	SL005721	Tumor necrosis factor alpha-induced protein 3	TNFAIP3	P21580	7128	TNFAIP3	Human	RFU	Protein	20	S2
14011-17	3	SL004809	Protein S100-A11	S100A11	P31949	6282	S100A11	Human	RFU	Protein	20	S2
14012-17	3	SL007593	Probable ATP-dependent RNA helicase DHX58	LGP2	Q96C10	79132	DHX58	Human	RFU	Protein	20	S1
14013-11	3	SL015118	TRAF family member-associated NF-kappa-B activator	TANK	Q92844	10010	TANK	Human	RFU	Protein	20	S2
14019-73	3	SL020305	Envoplakin	EVPL	Q92817	2125	EVPL	Human	RFU	Protein	20	S1
14021-81	3	SL020316	Mediator of RNA polymerase II transcription subunit 4	MED4	Q9NPJ6	29079	MED4	Human	RFU	Protein	20	S2
14022-17	3	SL004350	Interleukin-17B	IL-17B	Q9UHF5	27190	IL17B	Human	RFU	Protein	20	S2
14023-84	3	SL004660	Bone sialoprotein 2	BSP	P21815	3381	IBSP	Human	RFU	Protein	20	S2
14024-196	3	SL004644	Ectodysplasin-A, secreted form	EDA	Q92838	1896	EDA	Human	RFU	Protein	20	S1
14025-18	3	SL004126	Tumor necrosis factor receptor superfamily member 9	4-1BB	Q07011	3604	TNFRSF9	Human	RFU	Protein	20	S1
14026-24	3	SL004352	Interleukin-17F	IL-17F	Q96PD4	112744	IL17F	Human	RFU	Protein	20	S1
14028-22	3	SL020311	Phosphatidylinositol 4-phosphate 3-kinase C2 domain-containing subunit alpha	P3C2A	O00443	5286	PIK3C2A	Human	RFU	Protein	20	S1
14029-42	3	SL010966	COP9 signalosome complex subunit 2	CSN2	P61201	9318	COPS2	Human	RFU	Protein	20	S2
14030-21	3	SL004649	Tumor necrosis factor ligand superfamily member 4	OX40 Ligand	P23510	7292	TNFSF4	Human	RFU	Protein	20	S1
14031-18	3	SL001691	Fibroblast growth factor 7	FGF7	P21781	2252	FGF7	Human	RFU	Protein	20	S2
14032-2	3	SL003310	Vascular endothelial growth factor A, isoform 121	VEGF121	P15692	7422	VEGFA	Human	RFU	Protein	20	S2
14034-22	3	SL001890	Tumor-associated calcium signal transducer 2	GA733-1 protein	P09758	4070	TACSTD2	Human	RFU	Protein	20	S1
14035-13	3	SL007386	T-lymphoma invasion and metastasis-inducing protein 1	TIAM1	Q13009	7074	TIAM1	Human	RFU	Protein	20	S1
14036-116	3	SL020312	Multiple PDZ domain protein	MPDZ	O75970	8777	MPDZ	Human	RFU	Protein	20	S1
14037-18	3	SL013273	Ran-binding protein 3	RANB3	Q9H6Z4	8498	RANBP3	Human	RFU	Protein	20	S2
14038-130	3	SL007049	Cystatin-F	CYTF	O76096	8530	CST7	Human	RFU	Protein	20	S2
14039-33	3	SL003863	Kallikrein-5	kallikrein 5	Q9Y337	25818	KLK5	Human	RFU	Protein	20	S1
14041-13	3	SL004068	Granzyme B	Granzyme B	P10144	3002	GZMB	Human	RFU	Protein	20	S1
14042-11	3	SL003770	Secreted frizzled-related protein 1	SARP-2	Q8N474	6422	SFRP1	Human	RFU	Protein	20	S2
14043-12	3	SL008204	Early endosome antigen 1	EEA1	Q15075	8411	EEA1	Human	RFU	Protein	20	S1
14045-12	3	SL020317	Nuclear receptor coactivator 2	NCOA2	Q15596	10499	NCOA2	Human	RFU	Protein	20	S1
14047-78	3	SL003951	Brain-derived neurotrophic factor	BDNF	P23560	627	BDNF	Human	RFU	Protein	20	S1
14048-7	3	SL004588	Interleukin-1 Receptor accessory protein	IL-1 R AcP	Q9NPH3	3556	IL1RAP	Human	RFU	Protein	20	S2
14049-17	3	SL000483	Interleukin-7	IL-7	P13232	3574	IL7	Human	RFU	Protein	20	S1
14050-61	3	SL004140	Ephrin-A4	Ephrin-A4	P52798	1945	EFNA4	Human	RFU	Protein	20	S2
14051-54	3	SL007629	Forkhead box protein C2	FOXC2	Q99958	2303	FOXC2	Human	RFU	Protein	20	S1
14052-26	3	SL009417	Protein unc-13 homolog A	UN13A	Q9UPW8	23025	UNC13A	Human	RFU	Protein	20	S1
14054-17	3	SL004151	Interleukin-15 receptor subunit alpha	IL-15 Ra	Q13261	3601	IL15RA	Human	RFU	Protein	20	S2
14056-4	3	SL013948	Glycoprotein hormones alpha chain	Glycoprotein hormones a-chain	P01215	1081	CGA	Human	RFU	Protein	20	S1
14057-68	3	SL004686	Tumor necrosis factor ligand superfamily member 15	TNFSF15	O95150	9966	TNFSF15	Human	RFU	Protein	20	S2
14061-48	3	SL002541	Tumor necrosis factor ligand superfamily member 11	sRANKL	O14788	8600	TNFSF11	Human	RFU	Protein	20	S1
14063-17	3	SL000530	Oncostatin-M	OSM	P13725	5008	OSM	Human	RFU	Protein	20	S1
14064-21	3	SL004515	Peptidoglycan recognition protein 1	PGRP-S	O75594	8993	PGLYRP1	Human	RFU	Protein	20	S1
14065-11	3	SL025816	T-cell surface glycoprotein CD5:Cytoplasmic domain	CD5:CD	P06127	921	CD5	Human	RFU	Protein	20	S1
14066-49	3	SL020306	Membrane-associated guanylate kinase, WW and PDZ domain-containing protein 2	MAGI2	Q86UL8	9863	MAGI2	Human	RFU	Protein	20	S2
14067-6	3	SL008289	Plakophilin-2	PKP2	Q99959	5318	PKP2	Human	RFU	Protein	20	S1
14068-29	3	SL003197	C-C motif chemokine 25	TECK	O15444	6370	CCL25	Human	RFU	Protein	20	S2
14069-61	3	SL010369	Carbonic anhydrase 4	Carbonic Anhydrase IV	P22748	762	CA4	Human	RFU	Protein	20	S1
14070-56	3	SL018907	Intersectin-1	ITSN1	Q15811	6453	ITSN1	Human	RFU	Protein	20	S2
14073-31	3	SL000440	Hemopexin	Hemopexin	P02790	3263	HPX	Human	RFU	Protein	20	S3
14074-2	3	SL020307	SHC-transforming protein 2	SHC2	P98077	25759	SHC2	Human	RFU	Protein	20	S1
14076-74	3	SL007888	Cystatin-S	Cystatin-S	P01036	1472	CST4	Human	RFU	Protein	20	S1
14077-6	3	SL002086	Ficolin-3	Ficolin-3	O75636	8547	FCN3	Human	RFU	Protein	20	S2
14078-69	3	SL003186	Lymphotactin	Lymphotactin	P47992	6375	XCL1	Human	RFU	Protein	20	S2
14079-14	3	SL004152	Interleukin-18 receptor 1	IL-18 Ra	Q13478	8809	IL18R1	Human	RFU	Protein	20	S2
14081-5	3	SL005227	NKG2D ligand 1	ULBP-1	Q9BZM6	80329	ULBP1	Human	RFU	Protein	20	S2
14082-56	3	SL016540	Talin-2	TLN2	Q9Y4G6	83660	TLN2	Human	RFU	Protein	20	S2
14083-25	3	SL020314	Selenide, water dikinase 1	SPS1	P49903	22929	SEPHS1	Human	RFU	Protein	20	S2
14085-28	3	SL001718	Interleukin-13	IL-13	P35225	3596	IL13	Human	RFU	Protein	20	S2
14086-11	3	SL012754	Acid sphingomyelinase-like phosphodiesterase 3a	ASM3A	Q92484	10924	SMPDL3A	Human	RFU	Protein	20	S2
14088-38	3	SL005172	Insulin-like growth factor-binding protein 6	IGFBP-6	P24592	3489	IGFBP6	Human	RFU	Protein	20	S3
14090-23	3	SL020308	Differentially expressed in FDCP 6 homolog	DEFI6	Q9H4E7	50619	DEF6	Human	RFU	Protein	20	S1
14091-42	3	SL005371	Carbonyl reductase [NADPH] 3	Carbonyl reductase 3	O75828	874	CBR3	Human	RFU	Protein	20	S1
14093-10	3	SL004343	Fms-related tyrosine kinase 3 ligand	Flt3 ligand	P49771	2323	FLT3LG	Human	RFU	Protein	20	S2
14094-29	3	SL000138	Heparin-binding EGF-like growth factor	HB-EGF	Q99075	1839	HBEGF	Human	RFU	Protein	20	S1
14095-1	3	SL005204	NKG2-D type II integral membrane protein	NKG2D	P26718	100528032	KLRK1	Human	RFU	Protein	20	S1
14097-86	3	SL007502	Carbohydrate sulfotransferase 15	ST4S6	Q7LFX5	51363	CHST15	Human	RFU	Protein	20	S2
14098-28	3	SL020309	Cysteine--tRNA ligase, cytoplasmic	SYCC	P49589	833	CARS1	Human	RFU	Protein	20	S2
14099-20	3	SL009468	Proteasome subunit alpha type-4	PSA4	P25789	5685	PSMA4	Human	RFU	Protein	20	S1
14100-63	3	SL007929	Complement C1q subcomponent subunit C	C1QC	P02747	714	C1QC	Human	RFU	Protein	20	S1
14101-2	3	SL005153	Ciliary neurotrophic factor receptor subunit alpha	CNTFR alpha	P26992	1271	CNTFR	Human	RFU	Protein	20	S2
14102-6	3	SL000678	Granulysin	Granulysin	P22749	10578	GNLY	Human	RFU	Protein	20	S2
14103-12	3	SL010619	Tryptase gamma	TPSG1	Q9NRR2	25823	TPSG1	Human	RFU	Protein	20	S1
14104-1	3	SL026018	TLR4 interactor with leucine rich repeats:Cytoplasmic domain	TRIL:CD	Q7L0X0	9865	TRIL	Human	RFU	Protein	20	S1
14105-5	3	SL004876	Kallistatin	Kallistatin	P29622	5267	SERPINA4	Human	RFU	Protein	20	S3
14106-46	3	SL003682	Rap1 GTPase-GDP dissociation stimulator 1	GDP/GTP exchange protein	P52306	5910	RAP1GDS1	Human	RFU	Protein	20	S1
14107-1	3	SL020315	5-formyltetrahydrofolate cyclo-ligase	MTHFS	P49914	10588	MTHFS	Human	RFU	Protein	20	S2
14108-15	3	SL000584	Transforming growth factor beta-1	TGF-b1	P01137	7040	TGFB1	Human	RFU	Protein	20	S2
14109-15	3	SL003190	C-C motif chemokine 15	MIP-5	Q16663	6359	CCL15	Human	RFU	Protein	20	S2
14110-200	3	SL000532	SPARC	ON	P09486	6678	SPARC	Human	RFU	Protein	20	S2
14111-15	3	SL007206	Thrombospondin-2	TSP2	P35442	7058	THBS2	Human	RFU	Protein	20	S1
14112-40	3	SL005213	Tumor necrosis factor receptor superfamily member 19L	RELT	Q969Z4	84957	RELT	Human	RFU	Protein	20	S1
14114-18	3	SL019019	PILR alpha-associated neural protein	PIANP	Q8IYJ0	196500	PIANP	Human	RFU	Protein	20	S2
14115-34	3	SL002782	Adrenomedullin	Adrenomedullin	P35318	133	ADM	Human	RFU	Protein	20	S2
14116-129	3	SL004821	Protein S100-A4	S100A4	P26447	6275	S100A4	Human	RFU	Protein	20	S2
14120-2	3	SL018629	E3 ubiquitin-protein ligase RNF43	RNF43	Q68DV7	54894	RNF43	Human	RFU	Protein	20	S2
14121-24	3	SL004159	Tumor necrosis factor receptor superfamily member 10D	TRAIL R4	Q9UBN6	8793	TNFRSF10D	Human	RFU	Protein	20	S2
14122-132	3	SL018971	E3 ubiquitin-protein ligase ZNRF3	ZNRF3	Q9ULT6	84133	ZNRF3	Human	RFU	Protein	20	S1
14123-34	3	SL025873	V-type immunoglobulin domain-containing suppressor of T-cell activation:Extracellular domain	GI24:ECD	Q9H7M9	64115	VSIR	Human	RFU	Protein	20	S2
14124-6	3	SL004843	Ephrin-A2	Ephrin-A2	O43921	1943	EFNA2	Human	RFU	Protein	20	S2
14125-5	3	SL004747	Apolipoprotein M	ApoM	O95445	55937	APOM	Human	RFU	Protein	20	S2
14127-240	3	SL001880	Interferon beta	IFN-b	P01574	3456	IFNB1	Human	RFU	Protein	20	S1
14128-121	3	SL017106	Interferon alpha-10	IFN10	P01566	3446	IFNA10	Human	RFU	Protein	20	S1
14129-1	3	SL019978	Interferon alpha-7	IFNA7	P01567	3444	IFNA7	Human	RFU	Protein	20	S1
14131-37	3	SL025841	Ephrin-B2:Extracellular domain	EFNB2:ECD	P52799	1948	EFNB2	Human	RFU	Protein	20	S2
14132-21	3	SL020171	HERV-H LTR-associating protein 2	HHLA2	Q9UM44	11148	HHLA2	Human	RFU	Protein	20	S2
14133-93	3	SL000145	Interleukin-1 receptor type 2	IL-1 sRII	P27930	7850	IL1R2	Human	RFU	Protein	20	S2
14134-49	3	SL015046	Amphoterin-induced protein 2	AMGO2	Q86SJ2	347902	AMIGO2	Human	RFU	Protein	20	S2
14135-3	3	SL020172	Relaxin receptor 1	RXFP1	Q9HBX9	59350	RXFP1	Human	RFU	Protein	20	S1
14136-234	3	SL007696	Complement component C1q receptor	C1QR1	Q9NPY3	22918	CD93	Human	RFU	Protein	20	S2
14139-16	3	SL007828	Neuregulin-4	NRG4	Q8WWG1	145957	NRG4	Human	RFU	Protein	20	S1
14143-8	3	SL014983	Histone H2B type 2-E	H2B2E	Q16778	8349	H2BC21	Human	RFU	Protein	20	S2
14144-3	3	SL019979	Histone H2A type 3	H2A3	Q7L7L0	92815	H2AW	Human	RFU	Protein	20	S2
14146-92	3	SL008158	Histone H3.1	H31	P68431	8350	H3C1	Human	RFU	Protein	20	S2
14148-2	3	SL015510	Ubiquitin-like protein ISG15	UCRP	P05161	9636	ISG15	Human	RFU	Protein	20	S2
14149-9	3	SL005179	Interleukin-36 beta	IL-1F8	Q9NZH7	27177	IL36B	Human	RFU	Protein	20	S1
14150-7	3	SL005177	Interleukin-36 alpha	IL-1F6	Q9UHA7	27179	IL36A	Human	RFU	Protein	20	S2
14151-4	3	SL015510	Ubiquitin-like protein ISG15	UCRP	P05161	9636	ISG15	Human	RFU	Protein	20	S2
14153-8	3	SL004139	Ephrin-A3	Ephrin-A3	P52797	1944	EFNA3	Human	RFU	Protein	20	S2
14156-33	3	SL004815	14-3-3 protein beta/alpha	14-3-3 protein beta/alpha	P31946	7529	YWHAB	Human	RFU	Protein	20	S2
14157-21	3	SL004984	14-3-3 protein epsilon	14-3-3E	P62258	7531	YWHAE	Human	RFU	Protein	20	S2
14158-17	3	SL003848	Annexin A5	Annexin V	P08758	308	ANXA5	Human	RFU	Protein	20	S2
14178-18	3	SL007463	Cyclin-dependent kinase inhibitor 3	CDKN3	Q16667	1033	CDKN3	Human	RFU	Protein	20	S1
14186-13	3	SL019795	E3 ubiquitin-protein ligase rififylin	RFFL	Q8WZ73	117584	RFFL	Human	RFU	Protein	20	S2
14192-31	3	SL019930	Phosducin-like protein 2	PDCL2	Q8N4E4	132954	PDCL2	Human	RFU	Protein	20	S2
14197-2	3	SL019864	PR domain zinc finger protein 1	PRDM1	O75626	639	PRDM1	Human	RFU	Protein	20	S1
14203-3	3	SL008375	Annexin A7	ANXA7	P20073	310	ANXA7	Human	RFU	Protein	20	S2
14204-55	3	SL019533	Forkhead box protein J2	FOXJ2	Q9P0K8	55810	FOXJ2	Human	RFU	Protein	20	S1
14205-6	3	SL019865	Protein HEXIM2	HEXI2	Q96MH2	124790	HEXIM2	Human	RFU	Protein	20	S1
14206-28	3	SL025794	Amyloid beta A4 precursor protein-binding family B member 1:Phosphotyrosine Interaction Domain 2	APBB1:PID 2	O00213	322	APBB1	Human	RFU	Protein	20	S1
14208-3	3	SL019932	Retinoid-binding protein 7	RET7	Q96R05	116362	RBP7	Human	RFU	Protein	20	S2
14226-120	3	SL008524	S-methylmethionine--homocysteine S-methyltransferase BHMT2	BHMT2	Q9H2M3	23743	BHMT2	Human	RFU	Protein	20	S2
14227-21	3	SL008040	Myosin light chain 6B	MYL6B	P14649	140465	MYL6B	Human	RFU	Protein	20	S1
14229-5	3	SL019900	Adenylyltransferase and sulfurtransferase MOCS3	MOCS3	O95396	27304	MOCS3	Human	RFU	Protein	20	S2
14237-1	3	SL000451	Heat shock 70 kDa protein 1A	HSP 70	P0DMV8	3303	HSPA1A	Human	RFU	Protein	20	S2
14245-195	3	SL019901	Sorting nexin-7	SNX7	Q9UNH6	51375	SNX7	Human	RFU	Protein	20	S2
14246-50	3	SL016379	Docking protein 2	DOK2	O60496	9046	DOK2	Human	RFU	Protein	20	S1
14249-68	3	SL019794	Probable E3 ubiquitin-protein ligase MID2	TRIM1	Q9UJV3	11043	MID2	Human	RFU	Protein	20	S1
14250-115	3	SL008191	Bleomycin hydrolase	BLMH	Q13867	642	BLMH	Human	RFU	Protein	20	S1
14254-27	3	SL019925	Tyrosine-protein phosphatase non-receptor type 4	PTN4	P29074	5775	PTPN4	Human	RFU	Protein	20	S2
14260-112	3	SL015522	Neuroepithelial cell-transforming gene 1 protein	ARHG8	Q7Z628	10276	NET1	Human	RFU	Protein	20	S1
14268-4	3	SL007647	Sulfiredoxin-1	SRXN1	Q9BYN0	140809	SRXN1	Human	RFU	Protein	20	S2
14271-23	3	SL007707	Ras-related protein Rab-6B	RAB6B	Q9NRW1	51560	RAB6B	Human	RFU	Protein	20	S2
14273-19	3	SL010939	Prolyl endopeptidase	PPCE	P48147	5550	PREP	Human	RFU	Protein	20	S2
14283-12	3	SL008144	Ras-related protein Rab-14	RAB14	P61106	51552	RAB14	Human	RFU	Protein	20	S2
14286-2	3	SL005769	Nuclear factor of activated T-cells, cytoplasmic 1	NF-ATc1	O95644	4772	NFATC1	Human	RFU	Protein	20	S1
14287-6	3	SL008533	Ras-related protein Rab-5C	RAB5C	P51148	5878	RAB5C	Human	RFU	Protein	20	S2
14291-53	3	SL019710	Arf-GAP with GTPase, ANK repeat and PH domain-containing protein 2	AGAP2	Q99490	116986	AGAP2	Human	RFU	Protein	20	S1
14294-61	3	SL013880	Methyl-CpG-binding domain protein 1	MBD1	Q9UIS9	4152	MBD1	Human	RFU	Protein	20	S1
14309-8	3	SL013160	Heterogeneous nuclear ribonucleoprotein H	HNRH1	P31943	3187	HNRNPH1	Human	RFU	Protein	20	S2
14314-6	3	SL019714	Peptidyl-prolyl cis-trans isomerase-like 2	PPIL2	Q13356	23759	PPIL2	Human	RFU	Protein	20	S1
14318-1	3	SL013288	Vacuolar protein sorting-associated protein 29	VPS29	Q9UBQ0	51699	VPS29	Human	RFU	Protein	20	S2
14324-52	3	SL005089	Structural maintenance of chromosomes protein 3	CSPG6	Q9UQE7	9126	SMC3	Human	RFU	Protein	20	S2
14326-4	3	SL006253	Ubiquitin-conjugating enzyme E2 E1	UB2E1	P51965	7324	UBE2E1	Human	RFU	Protein	20	S2
14329-4	3	SL011624	Death-inducer obliterator 1	DIDO1	Q9BTC0	11083	DIDO1	Human	RFU	Protein	20	S1
14331-262	3	SL019738	Dynein light chain Tctex-type 1	DYLT1	P63172	6993	DYNLT1	Human	RFU	Protein	20	S2
14332-3	3	SL008025	Ras-related protein Ral-A	RALA	P11233	5898	RALA	Human	RFU	Protein	20	S2
14334-3	3	SL014781	Recoverin	RECO	P35243	5957	RCVRN	Human	RFU	Protein	20	S1
14337-1	3	SL019699	Trafficking protein particle complex subunit 3	TPPC3	O43617	27095	TRAPPC3	Human	RFU	Protein	20	S2
14341-8	3	SL019767	Protein FAM69C	FA69C	Q0P6D2	125704	DIPK1C	Human	RFU	Protein	20	S2
14583-49	3	SL004357	Growth/differentiation factor 8	Myostatin	O14793	2660	MSTN	Human	RFU	Protein	20	S2
14587-16	3	SL004345	Growth/differentiation factor 11	GDF-11	O95390	10220	GDF11	Human	RFU	Protein	20	S2
14593-152	3	SL020072	Protein FAM210A	F210A	Q96ND0	125228	FAM210A	Human	RFU	Protein	20	S2
14597-5	3	SL020074	Semaphorin-6C, cytoplasmic	SEM6C	Q9H3T2	10500	SEMA6C	Human	RFU	Protein	20	S1
14599-18	3	SL007723	Stabilin-1	STAB1	Q9NY15	23166	STAB1	Human	RFU	Protein	20	S1
14603-51	3	SL020082	Uncharacterized protein KIAA0040	KIAA0040	Q15053	9674	KIAA0040	Human	RFU	Protein	20	S2
14614-41	3	SL008890	Noncompact myelin-associated protein	CA130	Q5T1S8	400746	NCMAP	Human	RFU	Protein	20	S2
14615-46	3	SL020089	Keratin-associated protein 2-4	KRA24	Q9BYR9	730755	KRTAP2-4	Human	RFU	Protein	20	S2
14616-16	3	SL020097	Zinc finger protein 382	ZN382	Q96SR6	84911	ZNF382	Human	RFU	Protein	20	S1
14618-26	3	SL012766	Vesicular, overexpressed in cancer, prosurvival protein 1	ECOP	Q96AW1	81552	VOPP1	Human	RFU	Protein	20	S1
14619-8	3	SL020098	Zinc finger protein 526	ZN526	Q8TF50	116115	ZNF526	Human	RFU	Protein	20	S1
14623-26	3	SL018938	Small ubiquitin-related modifier 3	SUMO3	P55854	6612	SUMO3	Human	RFU	Protein	20	S2
14624-51	3	SL011618	Transcriptional repressor CTCF	CTCF	P49711	10664	CTCF	Human	RFU	Protein	20	S1
14628-72	3	SL020051	F-box only protein 3	FBX3	Q9UK99	26273	FBXO3	Human	RFU	Protein	20	S1
14631-22	3	SL020115	Dual specificity protein phosphatase 16	DUS16	Q9BY84	80824	DUSP16	Human	RFU	Protein	20	S1
14633-26	3	SL020121	Transmembrane protein 185A	T185A	Q8NFB2	84548	TMEM185A	Human	RFU	Protein	20	S2
14634-13	3	SL020122	Lutropin-choriogonadotropic hormone receptor	LSHR	P22888	3973	LHCGR	Human	RFU	Protein	20	S1
14645-253	3	SL020127	Glutathione S-transferase A4	GSTA4	O15217	2941	GSTA4	Human	RFU	Protein	20	S1
14655-1	3	SL020140	DnaJ homolog subfamily C member 17	DJC17	Q9NVM6	55192	DNAJC17	Human	RFU	Protein	20	S2
14662-6	3	SL020179	Myeloid zinc finger 1	MZF1	P28698	7593	MZF1	Human	RFU	Protein	20	S2
14663-44	3	SL020180	E3 ubiquitin-protein ligase RNF8	RNF8	O76064	9025	RNF8	Human	RFU	Protein	20	S2
14670-1	3	SL020187	Ski-like protein	SKIL	P12757	6498	SKIL	Human	RFU	Protein	20	S2
14674-63	3	SL020191	Protein kinase C and casein kinase substrate in neurons protein 3	PACN3	Q9UKS6	29763	PACSIN3	Human	RFU	Protein	20	S1
14675-20	3	SL011011	Eukaryotic translation initiation factor 4B	IF4B	P23588	1975	EIF4B	Human	RFU	Protein	20	S2
14684-17	3	SL011179	Calpain-2 catalytic subunit	CAN2	P17655	824	CAPN2	Human	RFU	Protein	20	S2
14685-17	3	SL003722	RAC-beta serine/threonine-protein kinase	PKB beta	P31751	208	AKT2	Human	RFU	Protein	20	S2
14687-6	3	SL007972	Perilipin-3	M6PBP	O60664	10226	PLIN3	Human	RFU	Protein	20	S1
14688-6	3	SL020212	Tyrosine-protein phosphatase non-receptor type 7	PTN7	P35236	5778	PTPN7	Human	RFU	Protein	20	S1
14689-3	3	SL011207	Protein SEC13 homolog	SEC13	P55735	6396	SEC13	Human	RFU	Protein	20	S2
14692-3	3	SL020215	Zinc finger protein 276	ZN276	Q8N554	92822	ZNF276	Human	RFU	Protein	20	S2
14696-45	3	SL010617	Tryptase beta-2	TPSB2	P20231	64499	TPSB2	Human	RFU	Protein	20	S1
14703-6	3	SL004332	Prokineticin-1	EG-VEGF	P58294	84432	PROK1	Human	RFU	Protein	20	S2
14705-1	3	SL003320	Vascular endothelial growth factor D	VEGF-D	O43915	2277	VEGFD	Human	RFU	Protein	20	S2
14708-59	3	SL007931	Complement component C8 gamma chain	CO8G	P07360	733	C8G	Human	RFU	Protein	20	S2
14711-27	3	SL004438	Cystatin-M	Cystatin M	Q15828	1474	CST6	Human	RFU	Protein	20	S2
14713-46	3	SL004589	Azurocidin	Azurocidin	P20160	566	AZU1	Human	RFU	Protein	20	S1
14747-9	3	SL020310	Cytokine receptor-like factor 1	CRLF1	O75462	9244	CRLF1	Human	RFU	Protein	20	S2
14748-31	3	SL020313	Rho GTPase-activating protein 5	RHG05	Q13017	394	ARHGAP5	Human	RFU	Protein	20	S1
14755-4	3	SL000496	Lactotransferrin	Lactoferrin	P02788	4057	LTF	Human	RFU	Protein	20	S1
14756-29	3	SL003177	Intercellular adhesion molecule 2	sICAM-2	P13598	3384	ICAM2	Human	RFU	Protein	20	S2
15297-3	3	SL004825	Protein S100-A3	S100A3	P33764	6274	S100A3	Human	RFU	Protein	20	S1
15298-199	3	SL017092	Neuropilin and tolloid-like protein 1	NETO1	Q8TDF5	81832	NETO1	Human	RFU	Protein	20	S2
15299-102	3	SL012502	LDLR chaperone MESD	MESD2	Q14696	23184	MESD	Human	RFU	Protein	20	S2
15300-66	3	SL017096	Coiled-coil domain-containing protein 134	CC134	Q9H6E4	79879	CCDC134	Human	RFU	Protein	20	S2
15301-24	3	SL009308	Acrosomal protein SP-10	sperm protein 10	P26436	56	ACRV1	Human	RFU	Protein	20	S1
15303-63	3	SL004826	Protein S100-A5	S100A5	P33763	6276	S100A5	Human	RFU	Protein	20	S2
15304-1	3	SL002648	Regenerating islet-derived protein 3-alpha	PAP1	Q06141	5068	REG3A	Human	RFU	Protein	20	S2
15305-7	3	SL005696	Secretagogin	Secretagogin	O76038	10590	SCGN	Human	RFU	Protein	20	S2
15306-20	3	SL005375	Immunoglobulin J chain	IgJ	P01591	3512	JCHAIN	Human	RFU	Protein	20	S1
15308-108	3	SL012520	Brorin	VWC2	Q2TAL6	375567	VWC2	Human	RFU	Protein	20	S2
15310-61	3	SL007011	Protein regulator of cytokinesis 1	PRC1	O43663	9055	PRC1	Human	RFU	Protein	20	S2
15312-14	3	SL019555	Protein argonaute-1	AGO1	Q9UL18	26523	AGO1	Human	RFU	Protein	20	S1
15313-28	3	SL007399	Mitotic spindle assembly checkpoint protein MAD2A	MD2L1	Q13257	4085	MAD2L1	Human	RFU	Protein	20	S1
15314-49	3	SL008340	Chloride intracellular channel protein 4	CLIC4	Q9Y696	25932	CLIC4	Human	RFU	Protein	20	S2
15315-64	3	SL019798	Copper homeostasis protein cutC homolog	CUTC	Q9NTM9	51076	CUTC	Human	RFU	Protein	20	S2
15316-262	3	SL019950	Thioredoxin-like protein 4B	TXN4B	Q9NX01	54957	TXNL4B	Human	RFU	Protein	20	S1
15318-75	3	SL004212	Protein S100-A10	Calpactin I light chain	P60903	6281	S100A10	Human	RFU	Protein	20	S2
15319-226	3	SL013808	Cyclin-A1	CCNA1	P78396	8900	CCNA1	Human	RFU	Protein	20	S1
15321-8	3	SL019971	Complexin-2	CPLX2	Q6PUV4	10814	CPLX2	Human	RFU	Protein	20	S2
15322-35	3	SL007330	Death domain-containing protein CRADD	CRADD	P78560	8738	CRADD	Human	RFU	Protein	20	S2
15323-112	3	SL019972	Protein argonaute-3	AGO3	Q9H9G7	192669	AGO3	Human	RFU	Protein	20	S1
15324-58	3	SL005628	Ferritin light chain	Ferritin light chain	P02792	2512	FTL	Human	RFU	Protein	20	S2
15325-14	3	SL007137	Neuromodulin	NEUM	P17677	2596	GAP43	Human	RFU	Protein	20	S2
15326-64	3	SL006479	Guanylate-binding protein 1	GBP1	P32455	2633	GBP1	Human	RFU	Protein	20	S2
15331-47	3	SL013819	Histone-binding protein RBBP4	RBBP4	Q09028	5928	RBBP4	Human	RFU	Protein	20	S2
15333-11	3	SL012799	Stromal cell-derived factor 2	SDF2	Q99470	6388	SDF2	Human	RFU	Protein	20	S2
15336-7	3	SL019976	Selenoprotein M	SELM	Q8WWX9	140606	SELENOM	Human	RFU	Protein	20	S2
15339-32	3	SL008333	Cofilin-2	COF2	Q9Y281	1073	CFL2	Human	RFU	Protein	20	S2
15343-337	3	SL000491	Kininogen, HMW, Two Chain	Kininogen, HMW, Two Chain	P01042	3827	KNG1	Human	RFU	Protein	20	S2
15346-31	3	SL001802	Interferon gamma	IFN-g	P01579	3458	IFNG	Human	RFU	Protein	20	S1
15347-12	3	SL000440	Hemopexin	Hemopexin	P02790	3263	HPX	Human	RFU	Protein	20	S3
15358-28	3	SL012407	Neuroendocrine protein 7B2	7B2	P05408	6447	SCG5	Human	RFU	Protein	20	S2
15361-37	3	SL019275	Ankyrin repeat domain-containing protein 1	ANKR1	Q15327	27063	ANKRD1	Human	RFU	Protein	20	S1
15363-32	3	SL004840	Apolipoprotein A-V	Apo A-V	Q6Q788	116519	APOA5	Human	RFU	Protein	20	S2
15364-101	3	SL000275	Apolipoprotein C-I	Apo C-I	P02654	341	APOC1	Human	RFU	Protein	20	S3
15365-41	3	SL020583	Adhesion G protein-coupled receptor B3	BAI3	O60242	577	ADGRB3	Human	RFU	Protein	20	S2
15367-38	3	SL012736	BPI fold-containing family B member 1	LPLC1	Q8TDL5	92747	BPIFB1	Human	RFU	Protein	20	S2
15368-3	3	SL007531	BMP-binding endothelial regulator protein	BMPER	Q8N8U9	168667	BMPER	Human	RFU	Protein	20	S2
15370-5	3	SL012877	BolA-like protein 1	BOLA1	Q9Y3E2	51027	BOLA1	Human	RFU	Protein	20	S2
15372-43	3	SL014748	Bromodomain-containing protein 2	BRD2	P25440	6046	BRD2	Human	RFU	Protein	20	S2
15375-49	3	SL011428	Carboxypeptidase B	Carboxypeptidase B1	P15086	1360	CPB1	Human	RFU	Protein	20	S2
15376-134	3	SL007121	Cathepsin E	CATE	P14091	1510	CTSE	Human	RFU	Protein	20	S1
15381-45	3	SL004120	Discoidin domain-containing receptor 2	Discoidin domain receptor 2	Q16832	4921	DDR2	Human	RFU	Protein	20	S2
15383-200	3	SL004700	Endothelin-3	Endothelin 3	P14138	1908	EDN3	Human	RFU	Protein	20	S2
15384-15	3	SL011369	Klotho	KLOTHO	Q9UEF7	9365	KL	Human	RFU	Protein	20	S2
15385-116	3	SL004848	Fatty acid-binding protein, intestinal	FABP2	P12104	2169	FABP2	Human	RFU	Protein	20	S1
15386-7	3	SL005086	Fatty acid-binding protein, adipocyte	FABPA	P15090	2167	FABP4	Human	RFU	Protein	20	S2
15387-44	3	SL005203	Neuropilin-2	Neuropilin-2	O60462	8828	NRP2	Human	RFU	Protein	20	S2
15388-24	3	SL004561	Low affinity immunoglobulin gamma Fc region receptor III-A	FcRIIIa	P08637	2214	FCGR3A	Human	RFU	Protein	20	S2
15389-1	3	SL012513	Frataxin, mitochondrial	FRDA	Q16595	2395	FXN	Human	RFU	Protein	20	S1
15390-3	3	SL004430	Galanin	Galanin	P22466	51083	GAL	Human	RFU	Protein	20	S1
15391-114	3	SL005707	Growth arrest-specific protein 6	GAS-6	Q14393	2621	GAS6	Human	RFU	Protein	20	S2
15394-79	3	SL008959	Netrin receptor UNC5B	UNC5B	Q8IZJ1	219699	UNC5B	Human	RFU	Protein	20	S2
15395-15	3	SL005254	Glutathione S-transferase Mu 1	GST M1-1	P09488	2944	GSTM1	Human	RFU	Protein	20	S2
15398-2	3	SL006727	FAD-linked sulfhydryl oxidase ALR	HERV1	P55789	2671	GFER	Human	RFU	Protein	20	S2
15402-2	3	SL005354	DNA-binding protein inhibitor ID-1	ID-1	P41134	3397	ID1	Human	RFU	Protein	20	S2
15403-53	3	SL007347	DNA-binding protein inhibitor ID-2	ID2	Q02363	3398	ID2	Human	RFU	Protein	20	S2
15404-3	3	SL018851	Interferon alpha-21	IFN21	P01568	3452	IFNA21	Human	RFU	Protein	20	S1
15405-23	3	SL018075	Interferon alpha-4	IFNA4	P05014	3441	IFNA4	Human	RFU	Protein	20	S2
15412-40	3	SL003731	Baculoviral IAP repeat-containing protein 7	KIAP	Q96CA5	79444	BIRC7	Human	RFU	Protein	20	S1
15413-3	3	SL006349	Phosphatidylcholine-sterol acyltransferase	LCAT	P04180	3931	LCAT	Human	RFU	Protein	20	S2
15414-316	3	SL019149	L-lactate dehydrogenase A chain	LDHA	P00338	3939	LDHA	Human	RFU	Protein	20	S2
15416-54	3	SL012646	Lysozyme g-like protein 2	LYG2	Q86SG7	254773	LYG2	Human	RFU	Protein	20	S1
15417-3	3	SL003161	Serpin B5	Maspin	P36952	5268	SERPINB5	Human	RFU	Protein	20	S1
15418-25	3	SL007282	Mitogen-activated protein kinase 10	MK10	P53779	5602	MAPK10	Human	RFU	Protein	20	S2
15419-15	3	SL012374	Matrix metalloproteinase-20	MMP20	O60882	9313	MMP20	Human	RFU	Protein	20	S2
15422-12	3	SL019975	Myelin P2 protein	MYP2	P02689	5375	PMP2	Human	RFU	Protein	20	S1
15426-5	3	SL008692	Sialidase-1	NEUR1	Q99519	4758	NEU1	Human	RFU	Protein	20	S2
15427-35	3	SL012455	Lysyl oxidase homolog 3	LOXL3	P58215	84695	LOXL3	Human	RFU	Protein	20	S2
15430-165	3	SL012859	Opticin	OPT	Q9UBM4	26254	OPTC	Human	RFU	Protein	20	S1
15431-31	3	SL000531	Ornithine carbamoyltransferase, mitochondrial	OTCase	P00480	5009	OTC	Human	RFU	Protein	20	S2
15432-1	3	SL004684	Otoraplin	Otoraplin	Q9NRC9	56914	OTOR	Human	RFU	Protein	20	S1
15433-4	3	SL005268	Proto-oncogene tyrosine-protein kinase Src	p60-Src	P12931	6714	SRC	Human	RFU	Protein	20	S1
15434-5	3	SL012495	Prepronociceptin	PNOC	Q13519	5368	PNOC	Human	RFU	Protein	20	S1
15435-4	3	SL005262	Purine nucleoside phosphorylase	PNP	P00491	4860	PNP	Human	RFU	Protein	20	S2
15436-40	3	SL014638	Receptor activity-modifying protein 1	RAMP1	O60894	10267	RAMP1	Human	RFU	Protein	20	S1
15437-11	3	SL008721	Receptor activity-modifying protein 3	RAMP3	O60896	10268	RAMP3	Human	RFU	Protein	20	S1
15439-21	3	SL014861	Rho-related GTP-binding protein RhoE	RND3	P61587	390	RND3	Human	RFU	Protein	20	S1
15440-57	3	SL012421	Neuroendocrine convertase 2	NEC2	P16519	5126	PCSK2	Human	RFU	Protein	20	S2
15441-6	3	SL008548	Ganglioside GM2 activator	SAP3	P17900	2760	GM2A	Human	RFU	Protein	20	S2
15444-45	3	SL001959	Serpin B4	SCCA2	P48594	6318	SERPINB4	Human	RFU	Protein	20	S1
15446-25	3	SL004651	Neuregulin-1, sensory and motor neuron-derived factor isoform	SMDF	Q02297	3084	NRG1	Human	RFU	Protein	20	S2
15447-45	3	SL000574	Sorbitol dehydrogenase	Sorbitol dehydrogenase	Q00796	6652	SORD	Human	RFU	Protein	20	S1
15448-47	3	SL018151	Sequestosome-1	SQSTM	Q13501	8878	SQSTM1	Human	RFU	Protein	20	S2
15449-33	3	SL010387	T-cell immunoglobulin and mucin domain-containing protein 4	TIM-4	Q96H15	91937	TIMD4	Human	RFU	Protein	20	S2
15452-5	3	SL000246	5'-Nucleotidase	5'-Nucleotidase	P21589	4907	NT5E	Human	RFU	Protein	20	S2
15453-3	3	SL003022	Alpha-1-microglobulin	a1-Microglobulin	P02760	259	AMBP	Human	RFU	Protein	20	S2
15455-40	3	SL025784	Disintegrin and metalloproteinase domain-containing protein 15:Extracellular domain	ADA15:ECD	Q13444	8751	ADAM15	Human	RFU	Protein	20	S2
15457-14	3	SL005238	Aminopeptidase N	Aminopeptidase N	P15144	290	ANPEP	Human	RFU	Protein	20	S2
15460-9	3	SL003281	Dipeptidyl peptidase 4	CD26	P27487	1803	DPP4	Human	RFU	Protein	20	S1
15462-28	3	SL007072	T-cell surface glycoprotein CD8 alpha chain	CD8A	P01732	925	CD8A	Human	RFU	Protein	20	S2
15465-79	3	SL012684	Protein canopy homolog 4	CNPY4	Q8N129	245812	CNPY4	Human	RFU	Protein	20	S2
15466-30	3	SL007148	Collagen alpha-1(IX) chain	CO9A1	P20849	1297	COL9A1	Human	RFU	Protein	20	S1
15467-10	3	SL009396	Collagen triple helix repeat-containing protein 1	CTHR1	Q96CG8	115908	CTHRC1	Human	RFU	Protein	20	S2
15468-14	3	SL002690	Complement factor H-related protein 1	FHR1	Q03591	3078	CFHR1	Human	RFU	Protein	20	S3
15470-11	3	SL005383	Beta-hexosaminidase subunit beta	Hexosaminidase B	P07686	3074	HEXB	Human	RFU	Protein	20	S2
15471-29	3	SL012442	Pancreatic lipase-related protein 2	LIPR2	P54317	5408	PNLIPRP2	Human	RFU	Protein	20	S2
15472-16	3	SL017588	Low-density lipoprotein receptor-related protein 11	LRP11	Q86VZ4	84918	LRP11	Human	RFU	Protein	20	S2
15474-7	3	SL013908	Peptidyl-prolyl cis-trans isomerase NIMA-interacting 1	PIN1	Q13526	5300	PIN1	Human	RFU	Protein	20	S2
15475-4	3	SL004948	Phospholipid transfer protein	PLTP	P55058	5360	PLTP	Human	RFU	Protein	20	S3
15476-6	3	SL007493	Regenerating islet-derived protein 3-gamma	REG3G	Q6UW15	130120	REG3G	Human	RFU	Protein	20	S2
15480-2	3	SL018020	Vascular non-inflammatory molecule 2	VNN2	O95498	8875	VNN2	Human	RFU	Protein	20	S2
15481-45	3	SL004525	Antibacterial protein LL-37	LL-37	P49913	820	CAMP	Human	RFU	Protein	20	S2
15482-12	3	SL012348	Alpha-2-macroglobulin-like protein 1	A2ML1	A8K2U0	144568	A2ML1	Human	RFU	Protein	20	S1
15483-377	3	SL005368	Agrin	Agrin	O00468	375790	AGRN	Human	RFU	Protein	20	S2
15486-126	3	SL008573	Amiloride-sensitive amine oxidase [copper-containing]	ABP1	P19801	26	AOC1	Human	RFU	Protein	20	S2
15487-164	3	SL006149	Liver carboxylesterase 1	carboxylesterase, liver	P23141	1066	CES1	Human	RFU	Protein	20	S1
15491-20	3	SL008437	Endosialin	CD248	Q9HCU0	57124	CD248	Human	RFU	Protein	20	S2
15492-1	3	SL025827	Cysteine-rich motor neuron 1 protein:Extracellular domain	CRIM1:ECD	Q9NZV1	51232	CRIM1	Human	RFU	Protein	20	S1
15494-11	3	SL011828	Fibroblast growth factor-binding protein 1	FGFP1	Q14512	9982	FGFBP1	Human	RFU	Protein	20	S1
15495-9	3	SL012435	Folate receptor gamma	FOLR3	P41439	2352	FOLR3	Human	RFU	Protein	20	S1
15497-9	3	SL012357	Heparan sulfate glucosamine 3-O-sulfotransferase 1	HS3S1	O14792	9957	HS3ST1	Human	RFU	Protein	20	S1
15499-11	3	SL006028	Attractin	Attractin	O75882	8455	ATRN	Human	RFU	Protein	20	S2
15503-15	3	SL004647	Left-right determination factor 2	Lefty-A	O00292	7044	LEFTY2	Human	RFU	Protein	20	S2
15503-20	3	SL004647	Left-right determination factor 2	Lefty-A	O00292	7044	LEFTY2	Human	RFU	Protein	20	S2
15504-39	3	SL004299	Baculoviral IAP repeat-containing protein 7 Isoform beta	Livin B	Q96CA5	79444	BIRC7	Human	RFU	Protein	20	S1
15506-34	3	SL018249	Low-density lipoprotein receptor-related protein 12	LRP12	Q9Y561	29967	LRP12	Human	RFU	Protein	20	S2
15509-2	3	SL003640	Alpha-N-acetylglucosaminidase	NAG	P54802	4669	NAGLU	Human	RFU	Protein	20	S2
15511-37	3	SL008970	Neuronal pentraxin receptor	NPTXR	O95502	23467	NPTXR	Human	RFU	Protein	20	S2
15513-108	3	SL003260	Prostasin	Prostasin	Q16651	5652	PRSS8	Human	RFU	Protein	20	S2
15514-26	3	SL001814	Cholinesterase	Pseudocholinesterase	P06276	590	BCHE	Human	RFU	Protein	20	S2
15515-2	3	SL000572	Serum amyloid A-1 protein	SAA	P0DJI8	6288	SAA1	Human	RFU	Protein	20	S2
15516-12	3	SL005700	Serum amyloid A-4 protein	SAA-4	P35542	6291	SAA4	Human	RFU	Protein	20	S3
15521-4	3	SL008440	Calsyntenin-1	Alcadein alpha-1	O94985	22883	CLSTN1	Human	RFU	Protein	20	S2
15522-2	3	SL008305	Golgi-associated plant pathogenesis-related protein 1	GAPR1	Q9H4G4	152007	GLIPR2	Human	RFU	Protein	20	S2
15523-9	3	SL008037	Delta-aminolevulinic acid dehydratase	HEM2	P13716	210	ALAD	Human	RFU	Protein	20	S2
15524-30	3	SL008043	Phosphoglycerate mutase 2	PGAM2	P15259	5224	PGAM2	Human	RFU	Protein	20	S2
15525-294	3	SL014682	Alcohol dehydrogenase 1C	ADH1G	P00326	126	ADH1C	Human	RFU	Protein	20	S1
15526-33	3	SL007246	Glutathione synthetase	GSHB	P48637	2937	GSS	Human	RFU	Protein	20	S2
15527-90	3	SL008018	Dihydrolipoyl dehydrogenase, mitochondrial	DLDH	P09622	1738	DLD	Human	RFU	Protein	20	S2
15530-33	3	SL004845	Ephrin type-B receptor 4	EphB4	P54760	2050	EPHB4	Human	RFU	Protein	20	S2
15533-97	3	SL025926	Macrophage scavenger receptor types I and II:Extracellular domain	Macrophage scavenger receptor:ECD	P21757	4481	MSR1	Human	RFU	Protein	20	S2
15534-26	3	SL004917	Malate dehydrogenase, mitochondrial	Malate dehydrogenase 2	P40926	4191	MDH2	Human	RFU	Protein	20	S2
15535-3	3	SL011069	Serine protease 27	Marapsin	Q9BQR3	83886	PRSS27	Human	RFU	Protein	20	S2
15539-15	3	SL008760	SLIT and NTRK-like protein 1	SLIK1	Q96PX8	114798	SLITRK1	Human	RFU	Protein	20	S2
15540-6	3	SL000649	Vimentin	Vimentin	P08670	7431	VIM	Human	RFU	Protein	20	S2
15542-19	3	SL013015	Creatine kinase U-type, mitochondrial	KCRU	P12532	1159	CKMT1A	Human	RFU	Protein	20	S2
15544-25	3	SL003919	Kallikrein-14	kallikrein 14	Q9P0G3	43847	KLK14	Human	RFU	Protein	20	S1
15545-13	3	SL004720	Calcineurin subunit B type 1	Calcineurin B a	P63098	5534	PPP3R1	Human	RFU	Protein	20	S2
15553-22	3	SL007155	Acetylcholinesterase	ACES	P22303	43	ACHE	Human	RFU	Protein	20	S1
15556-49	3	SL005393	Alpha-amylase 2B	Alpha-amylase 2B	P19961	280	AMY2B	Human	RFU	Protein	20	S2
15558-63	3	SL008525	Glutamyl aminopeptidase	AMPE	Q07075	2028	ENPEP	Human	RFU	Protein	20	S2
15559-5	3	SL011048	Anthrax toxin receptor 2	ANTR2	P58335	118429	ANTXR2	Human	RFU	Protein	20	S2
15560-52	3	SL003561	Transcobalamin-2	Apo-TC II	P20062	6948	TCN2	Human	RFU	Protein	20	S2
15562-24	3	SL008667	Beta-glucuronidase	BGLR	P08236	2990	GUSB	Human	RFU	Protein	20	S2
15565-102	3	SL000327	Mucin-16	CA125	Q8WXI7	94025	MUC16	Human	RFU	Protein	20	S1
15566-10	3	SL004911	Calponin-1	Calponin-1	P51911	1264	CNN1	Human	RFU	Protein	20	S1
15567-2	3	SL004471	T-cell surface glycoprotein CD3 zeta chain	CD3-zeta	P20963	919	CD247	Human	RFU	Protein	20	S1
15569-15	3	SL002527	Collagen Type II	Collagen II	P02458	1280	COL2A1	Human	RFU	Protein	20	S2
15570-99	3	SL004551	Complement receptor type 2	Complement receptor type 2	P20023	1380	CR2	Human	RFU	Protein	20	S2
15573-110	3	SL008782	Neurocan core protein	CSPG3	O14594	1463	NCAN	Human	RFU	Protein	20	S2
15574-37	3	SL000385	Cyclin-A2	Cyclin A	P20248	890	CCNA2	Human	RFU	Protein	20	S1
15576-158	3	SL003107	Eosinophil cationic protein	ECP	P12724	6037	RNASE3	Human	RFU	Protein	20	S2
15579-26	3	SL008780	Ectonucleotide pyrophosphatase/phosphodiesterase family member 6	ENPP6	Q6UWR7	133121	ENPP6	Human	RFU	Protein	20	S2
15580-2	3	SL008537	Ephrin type-A receptor 7	EPHA7	Q15375	2045	EPHA7	Human	RFU	Protein	20	S2
15581-16	3	SL019927	Fibronectin type 3 and ankyrin repeat domains protein 1	FANK1	Q8TC84	92565	FANK1	Human	RFU	Protein	20	S1
15582-25	3	SL010462	Ficolin-1	FCN1	O00602	2219	FCN1	Human	RFU	Protein	20	S2
15583-18	3	SL012568	Fc receptor-like B	FCRLB	Q6BAA4	127943	FCRLB	Human	RFU	Protein	20	S1
15584-9	3	SL002691	Complement factor H-related protein 2	FHR2	P36980	3080	CFHR2	Human	RFU	Protein	20	S2
15585-304	3	SL004460	Fibulin-5	fibulin 5	Q9UBX5	10516	FBLN5	Human	RFU	Protein	20	S2
15587-20	3	SL009334	Folate receptor beta	FOLR2	P14207	2350	FOLR2	Human	RFU	Protein	20	S2
15588-17	3	SL009217	Alpha-galactosidase A	galactosidase, alpha	P06280	2717	GLA	Human	RFU	Protein	20	S2
15589-1	3	SL000431	Vitamin D-binding protein	Gc-Globulin, Mixed Type	P02774	2638	GC	Human	RFU	Protein	20	S3
15591-28	3	SL001812	Glutathione peroxidase 1	Glutathione peroxidase	P07203	2876	GPX1	Human	RFU	Protein	20	S2
15594-47	3	SL008268	Serine protease HTRA1	HTRA1	Q92743	5654	HTRA1	Human	RFU	Protein	20	S2
15596-7	3	SL020142	Protein HEXIM1	HEXI1	O94992	10614	HEXIM1	Human	RFU	Protein	20	S1
15602-43	3	SL001943	Interleukin-6 receptor subunit alpha	IL-6 sRa	P08887	3570	IL6R	Human	RFU	Protein	20	S2
15603-20	3	SL004086	Integrin alpha-2	Integrin alpha-2	P17301	3673	ITGA2	Human	RFU	Protein	20	S1
15604-18	3	SL004716	Mitogen-activated protein kinase 9	JNK2	P45984	5601	MAPK9	Human	RFU	Protein	20	S2
15606-19	3	SL000044	Keratin, type I cytoskeletal 19	Keratin 19	P08727	3880	KRT19	Human	RFU	Protein	20	S2
15607-56	3	SL009203	Pyruvate kinase PKLR	KPYR	P30613	5313	PKLR	Human	RFU	Protein	20	S2
15608-5	3	SL018792	Ribosomal protein S6 kinase beta-1	KS6B1	P23443	6198	RPS6KB1	Human	RFU	Protein	20	S1
15610-72	3	SL000499	Cytosol aminopeptidase	LAP	P28838	51056	LAP3	Human	RFU	Protein	20	S2
15612-5	3	SL012168	Protein lin-7 homolog B	LIN7B	Q9HAP6	64130	LIN7B	Human	RFU	Protein	20	S2
15613-16	3	SL012420	Pancreatic triacylglycerol lipase	LIPP	P16233	5406	PNLIP	Human	RFU	Protein	20	S2
15614-168	3	SL012686	Leukocyte immunoglobulin-like receptor subfamily A member 2	LIRA2	Q8N149	11027	LILRA2	Human	RFU	Protein	20	S2
15615-8	3	SL019428	Leukocyte immunoglobulin-like receptor subfamily B member 3	LIRB3	O75022	102725035	LILRB3	Human	RFU	Protein	20	S2
15617-8	3	SL010168	Cytokine SCM-1 beta	lymphotactin beta	Q9UBD3	6846	XCL2	Human	RFU	Protein	20	S2
15619-49	3	SL012514	Myelin-oligodendrocyte glycoprotein	MOG	Q16653	4340	MOG	Human	RFU	Protein	20	S1
15620-4	3	SL018410	Neuroligin-1	NLGN1	Q8N2Q7	22871	NLGN1	Human	RFU	Protein	20	S2
15622-13	3	SL005491	Opioid-binding protein/cell adhesion molecule	OBCAM	Q14982	4978	OPCML	Human	RFU	Protein	20	S2
15623-1	3	SL005211	Programmed cell death protein 1	PD-1	Q15116	5133	PDCD1	Human	RFU	Protein	20	S1
15626-223	3	SL005400	Basement membrane-specific heparan sulfate proteoglycan core protein	Perlecan	P98160	3339	HSPG2	Human	RFU	Protein	20	S2
15627-83	3	SL003721	RAC-alpha serine/threonine-protein kinase	PKB	P31749	207	AKT1	Human	RFU	Protein	20	S2
15631-18	3	SL014708	Pregnancy-specific beta-1-glycoprotein 1	PSG1	P11464	5669	PSG1	Human	RFU	Protein	20	S1
15634-139	3	SL012379	Slit homolog 1 protein	SLIT1	O75093	6585	SLIT1	Human	RFU	Protein	20	S2
15635-4	3	SL012834	SPARC-related modular calcium-binding protein 2	SMOC2	Q9H3U7	64094	SMOC2	Human	RFU	Protein	20	S2
15636-49	3	SL014090	VPS10 domain-containing receptor SorCS1	SORC1	Q8WY21	114815	SORCS1	Human	RFU	Protein	20	S2
15637-38	3	SL014089	VPS10 domain-containing receptor SorCS3	SORC3	Q9UPU3	22986	SORCS3	Human	RFU	Protein	20	S2
15640-54	3	SL008169	Transgelin	TAGL	Q01995	6876	TAGLN	Human	RFU	Protein	20	S2
15641-20	3	SL020463	Tomoregulin-1	TEFF1	Q8IYR6	100526694	TMEFF1	Human	RFU	Protein	20	S2
15644-1	3	SL000303	Biotinidase	Biotinidase	P43251	686	BTD	Human	RFU	Protein	20	S2
15653-9	3	SL006511	Collagen alpha-1(X) chain	COAA1	Q03692	1300	COL10A1	Human	RFU	Protein	20	S1
15666-21	3	SL000304	Bone morphogenetic protein 2	BMP-2	P12643	650	BMP2	Human	RFU	Protein	20	S1
15667-39	3	SL003996	Bone morphogenetic protein 4	BMP-4	P12644	652	BMP4	Human	RFU	Protein	20	S2
15668-19	3	SL004079	Bone morphogenetic protein 8B	BMP-8	P34820	656	BMP8B	Human	RFU	Protein	20	S1
15669-7	3	SL007123	Serine/threonine-protein kinase B-raf	BRAF1	P15056	673	BRAF	Human	RFU	Protein	20	S2
15670-15	3	SL017430	Complement C1q-like protein 2	C1QL2	Q7Z5L3	165257	C1QL2	Human	RFU	Protein	20	S2
15674-3	3	SL011613	B-cell antigen receptor complex-associated protein alpha chain	CD79A	P11912	973	CD79A	Human	RFU	Protein	20	S2
15675-3	3	SL007136	CCAAT/enhancer-binding protein beta	CEBPB	P17676	1051	CEBPB	Human	RFU	Protein	20	S1
15678-71	3	SL009413	Dickkopf-related protein 2	DKK2	Q9UBU2	27123	DKK2	Human	RFU	Protein	20	S2
15686-49	3	SL007288	Inhibin beta C chain	INHBC	P55103	3626	INHBC	Human	RFU	Protein	20	S1
15688-30	3	SL004488	Protein ERGIC-53	Mannose-binding lectin	P49257	3998	LMAN1	Human	RFU	Protein	20	S1
15692-300	3	SL007608	Nodal homolog	NODAL	Q96S42	4838	NODAL	Human	RFU	Protein	20	S1
15693-9	3	SL000008	Progesterone receptor	PgR	P06401	5241	PGR	Human	RFU	Protein	20	S2
15698-6	3	SL007220	Alpha-taxilin	TXLNA	P40222	200081	TXLNA	Human	RFU	Protein	20	S2
16015-19	3	SL000617	Alanine aminotransferase 1	ALT	P24298	2875	GPT	Human	RFU	Protein	20	S2
16035-8	3	SL003322	Vascular endothelial growth factor receptor 3	VEGF sR3	P35916	2324	FLT4	Human	RFU	Protein	20	S1
16043-30	3	SL025982	SHC-transforming protein 1:Phosphotyrosine Interaction Domain	SHC1:PID	P29353	6464	SHC1	Human	RFU	Protein	20	S2
16055-3	3	SL006830	Complement factor H-related protein 5	complement factor H-related 5	Q9BXR6	81494	CFHR5	Human	RFU	Protein	20	S2
16057-6	3	SL003679	Cation-independent mannose-6-phosphate receptor	IGF-II receptor	P11717	3482	IGF2R	Human	RFU	Protein	20	S2
16060-99	3	SL008193	Nidogen-2	NID2	Q14112	22795	NID2	Human	RFU	Protein	20	S2
16070-7	3	SL004652	Wnt inhibitory factor 1	WIF-1	Q9Y5W5	11197	WIF1	Human	RFU	Protein	20	S2
16074-12	3	SL005725	GRB2-related adapter protein 2	GRB2-related adapter protein 2	O75791	9402	GRAP2	Human	RFU	Protein	20	S1
16079-2	3	SL010518	Tyrosine-protein kinase Tec	TEC	P42680	7006	TEC	Human	RFU	Protein	20	S1
16081-38	3	SL005692	Aldo-keto reductase family 1 member B10	Aldose reductase-like	O60218	57016	AKR1B10	Human	RFU	Protein	20	S2
16288-17	3	SL013797	Ephrin type-A receptor 4	EPHA4	P54764	2043	EPHA4	Human	RFU	Protein	20	S3
16292-288	3	SL011908	Gastric inhibitory polypeptide	GIP	P09681	2695	GIP	Human	RFU	Protein	20	S2
16293-1	3	SL005255	Somatoliberin	Growth hormone-releasing factor	P01286	2691	GHRH	Human	RFU	Protein	20	S2
16296-43	3	SL017638	Leucine-rich repeat-containing G-protein coupled receptor 5	LGR5	O75473	8549	LGR5	Human	RFU	Protein	20	S1
16297-14	3	SL008763	Roundabout homolog 4	ROBO4	Q8WZ75	54538	ROBO4	Human	RFU	Protein	20	S1
16298-84	3	SL003840	Group IID secretory phospholipase A2	sPLA(2)-IID	Q9UNK4	26279	PLA2G2D	Human	RFU	Protein	20	S1
16300-4	3	SL017099	Triggering receptor expressed on myeloid cells 2	TREM2	Q9NZC2	54209	TREM2	Human	RFU	Protein	20	S2
16302-11	3	SL010290	BPI fold-containing family A member 2	SPLC2	Q96DR5	140683	BPIFA2	Human	RFU	Protein	20	S2
16304-6	3	SL017589	Leucine-rich repeat-containing G-protein coupled receptor 4	LGR4	Q9BXB1	55366	LGR4	Human	RFU	Protein	20	S1
16307-22	3	SL005231	Netrin receptor UNC5D	UNC5H4	Q6UXZ4	137970	UNC5D	Human	RFU	Protein	20	S2
16308-14	3	SL008978	B- and T-lymphocyte attenuator	BTLA	Q7Z6A9	151888	BTLA	Human	RFU	Protein	20	S1
16309-30	3	SL010381	Dickkopf-like protein 1	Soggy-1	Q9UK85	27120	DKKL1	Human	RFU	Protein	20	S2
16312-45	3	SL004865	Cadherin-6	Cadherin-6	P55285	1004	CDH6	Human	RFU	Protein	20	S1
16315-105	3	SL003321	Vascular endothelial growth factor receptor 1	VEGF sR1	P17948	2321	FLT1	Human	RFU	Protein	20	S1
16317-20	3	SL004969	Desmoglein-3	Desmoglein-3	P32926	1830	DSG3	Human	RFU	Protein	20	S2
16318-12	3	SL004851	Serine/threonine-protein kinase receptor R3	ALK-1	P37023	94	ACVRL1	Human	RFU	Protein	20	S2
16320-139	3	SL009127	CD320 antigen	CD320	Q9NPF0	51293	CD320	Human	RFU	Protein	20	S2
16322-10	3	SL012743	Marginal zone B- and B1-cell-specific protein	PACAP	Q8WU39	51237	MZB1	Human	RFU	Protein	20	S2
16323-8	3	SL020462	Neurexin-3	NRX3A	Q9Y4C0	9369	NRXN3	Human	RFU	Protein	20	S2
16324-38	3	SL026004	Toll-like receptor 1:Extracellular domain	TLR1:ECD	Q15399	7096	TLR1	Human	RFU	Protein	20	S1
16536-3	3	SL006117	High mobility group protein HMG-I/HMG-Y	HMGA1	P17096	3159	HMGA1	Human	RFU	Protein	20	S1
16551-14	3	SL019098	Signal transducer and activator of transcription 5B	STA5B	P51692	6777	STAT5B	Human	RFU	Protein	20	S2
16558-2	3	SL008560	Myocilin	MYOC	Q99972	4653	MYOC	Human	RFU	Protein	20	S2
16561-9	3	SL005720	Alpha-1B-glycoprotein	Alpha-1B-glycoprotein	P04217	1	A1BG	Human	RFU	Protein	20	S2
16583-8	3	SL020189	Bis(5'-nucleosyl)-tetraphosphatase [asymmetrical]	AP4A	P50583	318	NUDT2	Human	RFU	Protein	20	S2
16585-16	3	SL017452	N-acetyllactosaminide beta-1,3-N-acetylglucosaminyltransferase 4	B3GN4	Q9C0J1	79369	B3GNT4	Human	RFU	Protein	20	S1
16591-71	3	SL012820	Acidic mammalian chitinase	CHIA	Q9BZP6	27159	CHIA	Human	RFU	Protein	20	S2
16593-3	3	SL003820	FAS-associated death domain protein	FADD	Q13158	8772	FADD	Human	RFU	Protein	20	S2
16594-44	3	SL018037	Fas apoptotic inhibitory molecule 1	FAIM1	Q9NVQ4	55179	FAIM	Human	RFU	Protein	20	S2
16596-25	3	SL012999	Glutaredoxin-3	GLRX3	O76003	10539	GLRX3	Human	RFU	Protein	20	S2
16597-11	3	SL013189	Glutaredoxin-related protein 5, mitochondrial	GLRX5	Q86SX6	51218	GLRX5	Human	RFU	Protein	20	S1
16599-38	3	SL018803	GPN-loop GTPase 1	GPN1	Q9HCN4	11321	GPN1	Human	RFU	Protein	20	S1
16605-2	3	SL017275	Complement C1q and tumor necrosis factor-related protein 9A	C1T9A	P0C862	338872	C1QTNF9	Human	RFU	Protein	20	S1
16606-85	3	SL003659	Aldose reductase	Aldose reductase	P15121	231	AKR1B1	Human	RFU	Protein	20	S2
16607-78	3	SL005572	Gelsolin	Gelsolin	P06396	2934	GSN	Human	RFU	Protein	20	S3
16609-106	3	SL012592	Kin of IRRE-like protein 2	KIRR2	Q6UWL6	84063	KIRREL2	Human	RFU	Protein	20	S2
16610-13	3	SL007503	Low-density lipoprotein receptor-related protein 10	LRP10	Q7Z4F1	26020	LRP10	Human	RFU	Protein	20	S2
16612-28	3	SL020764	Syndecan-3	SDC3	O75056	9672	SDC3	Human	RFU	Protein	20	S2
16613-3	3	SL008898	Cadherin-17	CAD17	Q12864	1015	CDH17	Human	RFU	Protein	20	S2
16614-27	3	SL017248	R-spondin-1	RSPO1	Q2MKA7	284654	RSPO1	Human	RFU	Protein	20	S2
16616-137	3	SL007119	Beta-enolase	ENOB	P13929	2027	ENO3	Human	RFU	Protein	20	S1
16618-7	3	SL007370	Early activation antigen CD69	CD69	Q07108	969	CD69	Human	RFU	Protein	20	S1
16620-26	3	SL007021	Lymphocyte antigen 75	LY75	O60449	100526664	LY75	Human	RFU	Protein	20	S2
16621-77	3	SL012584	NAD(P)H-hydrate epimerase	AIBP	Q8NCW5	128240	NAXE	Human	RFU	Protein	20	S2
16746-12	3	SL003950	Activin B	Activin B	P09529	3625	INHBB	Human	RFU	Protein	20	S2
16748-1	3	SL003995	Bone morphogenetic protein 3	BMP-3	P12645	651	BMP3	Human	RFU	Protein	20	S1
16749-79	3	SL005151	Growth/differentiation factor 10	BMP-3b	P55107	2662	GDF10	Human	RFU	Protein	20	S1
16751-15	3	SL002689	Natriuretic peptides B	BNP	P16860	4879	NPPB	Human	RFU	Protein	20	S1
16753-46	3	SL007942	Collagen alpha-2(VI) chain	CO6A2	P12110	1292	COL6A2	Human	RFU	Protein	20	S2
16754-40	3	SL019118	Peripheral plasma membrane protein CASK	CSKP	O14936	8573	CASK	Human	RFU	Protein	20	S1
16755-195	3	SL004675	Growth/differentiation factor 3	GDF-3	Q9NR23	9573	GDF3	Human	RFU	Protein	20	S1
16756-30	3	SL007504	Growth/differentiation factor 7	GDF7	Q7Z4P5	151449	GDF7	Human	RFU	Protein	20	S1
16758-96	3	SL013046	Hepatoma-derived growth factor	HDGF	P51858	3068	HDGF	Human	RFU	Protein	20	S2
16763-11	3	SL017261	Leukocyte cell-derived chemotaxin-2	LECT2	O14960	3950	LECT2	Human	RFU	Protein	20	S2
16765-52	3	SL004294	Platelet basic protein	PBP	P02775	5473	PPBP	Human	RFU	Protein	20	S2
16768-3	3	SL006467	Junction plakoglobin	PLAK	P14923	3728	JUP	Human	RFU	Protein	20	S2
16769-20	3	SL007310	Ras-related C3 botulinum toxin substrate 3	RAC3	P60763	5881	RAC3	Human	RFU	Protein	20	S1
16770-3	3	SL012438	Lithostathine-1-beta	REG1B	P48304	5968	REG1B	Human	RFU	Protein	20	S2
16773-29	3	SL012672	Signal peptide, CUB and EGF-like domain-containing protein 3	SCUB3	Q8IX30	222663	SCUBE3	Human	RFU	Protein	20	S2
16780-6	3	SL000451	Heat shock 70 kDa protein 1A	HSP 70	P0DMV8	3303	HSPA1A	Human	RFU	Protein	20	S2
16781-2	3	SL012928	Cytosolic endo-beta-N-acetylglucosaminidase	ENASE	Q8NFI3	64772	ENGASE	Human	RFU	Protein	20	S1
16785-45	3	SL004530	Defensin-5	HD-5	Q01523	1670	DEFA5	Human	RFU	Protein	20	S2
16792-4	3	SL005216	Sialic acid-binding Ig-like lectin 5	Siglec-5	O15389	8778	SIGLEC5	Human	RFU	Protein	20	S2
16802-31	3	SL010530	OCIA domain-containing protein 1	OCAD1	Q9NX40	54940	OCIAD1	Human	RFU	Protein	20	S1
16803-4	3	SL008657	Calretinin	CALB2	P22676	794	CALB2	Human	RFU	Protein	20	S2
16807-35	3	SL020644	Troponin T, fast skeletal muscle	TNNT3	P45378	7140	TNNT3	Human	RFU	Protein	20	S2
16809-1	3	SL006976	Nucleoside diphosphate kinase, mitochondrial	NDKM	O00746	4833	NME4	Human	RFU	Protein	20	S2
16810-3	3	SL002794	Rab GDP dissociation inhibitor alpha	RhoGDI	P31150	2664	GDI1	Human	RFU	Protein	20	S2
16814-13	3	SL002083	Four and a half LIM domains protein 1	SLIM 1	Q13642	2273	FHL1	Human	RFU	Protein	20	S1
16818-200	3	SL017488	CUB domain-containing protein 1	CDCP1	Q9H5V8	64866	CDCP1	Human	RFU	Protein	20	S2
16823-75	3	SL007053	Apolipoprotein L3	APOL3	O95236	80833	APOL3	Human	RFU	Protein	20	S2
16825-20	3	SL018716	Ataxin-3	ATX3	P54252	4287	ATXN3	Human	RFU	Protein	20	S2
16828-8	3	SL002657	Collagen alpha-1(VI) chain	Collagen a1(VI)	P12109	1291	COL6A1	Human	RFU	Protein	20	S2
16831-7	3	SL019539	Docking protein 1	DOK1	Q99704	1796	DOK1	Human	RFU	Protein	20	S2
16836-1	3	SL002693	Complement factor H-related protein 3	FHR3	Q02985	10878	CFHR3	Human	RFU	Protein	20	S1
16845-15	3	SL017475	Myelin protein zero-like protein 1	MPZL1	O95297	9019	MPZL1	Human	RFU	Protein	20	S1
16847-39	3	SL008946	Ras-related protein Rab-3B	RAB3B	P20337	5865	RAB3B	Human	RFU	Protein	20	S1
16850-5	3	SL005359	Regulator of G-protein signaling 5	RGS5	O15539	8490	RGS5	Human	RFU	Protein	20	S1
16851-50	3	SL018615	Protein SCO2 homolog, mitochondrial	SCO2	O43819	9997	SCO2	Human	RFU	Protein	20	S1
16852-10	3	SL019239	Na(+)/H(+) exchange regulatory cofactor NHE-RF3	NHRF3	Q5T2W1	5174	PDZK1	Human	RFU	Protein	20	S1
16853-5	3	SL006756	Nicotinamide riboside kinase 1	NRK1	Q9NWW6	54981	NMRK1	Human	RFU	Protein	20	S1
16854-17	3	SL015367	U6 snRNA-associated Sm-like protein LSm4	LSM4	Q9Y4Z0	25804	LSM4	Human	RFU	Protein	20	S2
16856-79	3	SL007443	Microtubule-associated protein RP/EB family member 2	MARE2	Q15555	10982	MAPRE2	Human	RFU	Protein	20	S1
16857-2	3	SL008705	Ras-related protein Rab-2A	RAB2A	P61019	5862	RAB2A	Human	RFU	Protein	20	S2
16858-384	3	SL017265	Reticulocalbin-3	RCN3	Q96D15	57333	RCN3	Human	RFU	Protein	20	S1
16859-100	3	SL016527	Endophilin-B1	SHLB1	Q9Y371	51100	SH3GLB1	Human	RFU	Protein	20	S1
16863-47	3	SL016552	N-acylneuraminate-9-phosphatase	NANP	Q8TBE9	140838	NANP	Human	RFU	Protein	20	S2
16865-62	3	SL013228	TATA-binding protein-associated factor 2N	RBP56	Q92804	8148	TAF15	Human	RFU	Protein	20	S2
16867-76	3	SL007335	Cyclin-dependent kinase 16	PCTK1	Q00536	5127	CDK16	Human	RFU	Protein	20	S1
16872-248	3	SL007013	Maleylacetoacetate isomerase	MAAI	O43708	2954	GSTZ1	Human	RFU	Protein	20	S1
16875-13	3	SL019553	Protein mago nashi homolog 2	MGN2	Q96A72	55110	MAGOHB	Human	RFU	Protein	20	S2
16877-19	3	SL019317	Methionine-R-sulfoxide reductase B2, mitochondrial	MSRB2	Q9Y3D2	22921	MSRB2	Human	RFU	Protein	20	S1
16882-27	3	SL008943	14 kDa phosphohistidine phosphatase	PHP14	Q9NRX4	29085	PHPT1	Human	RFU	Protein	20	S2
16883-57	3	SL007144	Ras-related protein Rab-4A	RAB4A	P20338	5867	RAB4A	Human	RFU	Protein	20	S1
16885-49	3	SL020106	Microtubule-associated protein RP/EB family member 3	MARE3	Q9UPY8	22924	MAPRE3	Human	RFU	Protein	20	S2
16887-29	3	SL017474	Peptidyl-tRNA hydrolase 2, mitochondrial	PTH2	Q9Y3E5	51651	PTRH2	Human	RFU	Protein	20	S1
16890-37	3	SL012697	ADAMTS-like protein 1	ATL1	Q8N6G6	92949	ADAMTSL1	Human	RFU	Protein	20	S2
16892-23	3	SL008778	Ectonucleotide pyrophosphatase/phosphodiesterase family member 2	ENPP2	Q13822	5168	ENPP2	Human	RFU	Protein	20	S3
16899-59	3	SL019034	Oxysterol-binding protein-related protein 9	OSBL9	Q96SU4	114883	OSBPL9	Human	RFU	Protein	20	S2
16900-29	3	SL012713	MAM domain-containing glycosylphosphatidylinositol anchor protein 1	MDGA1	Q8NFP4	266727	MDGA1	Human	RFU	Protein	20	S2
16902-17	3	SL008407	Lysosome-associated membrane glycoprotein 1	LAMP1	P11279	3916	LAMP1	Human	RFU	Protein	20	S2
16907-3	3	SL004806	Cell adhesion molecule 2	Nectin-like protein 3	Q8N3J6	253559	CADM2	Human	RFU	Protein	20	S2
16908-5	3	SL010377	Oligodendrocyte-myelin glycoprotein	OMGP	P23515	4974	OMG	Human	RFU	Protein	20	S3
16913-8	3	SL008937	Ribonuclease T2	RNT2	O00584	8635	RNASET2	Human	RFU	Protein	20	S2
16914-104	3	SL001743	Monocyte differentiation antigen CD14, soluble	sCD14	P08571	929	CD14	Human	RFU	Protein	20	S2
16915-153	3	SL014291	Semaphorin-4A	SEM4A	Q9H3S1	64218	SEMA4A	Human	RFU	Protein	20	S2
16916-19	3	SL018357	SLIT and NTRK-like protein 6	SLIK6	Q9H5Y7	84189	SLITRK6	Human	RFU	Protein	20	S2
16918-198	3	SL004491	Toll-like receptor 3	TLR3	O15455	7098	TLR3	Human	RFU	Protein	20	S2
16919-1	3	SL008480	Acyl-CoA-binding protein	ACBP	P07108	1622	DBI	Human	RFU	Protein	20	S2
16922-53	3	SL014112	Plexin-B3	PLXB3	Q9ULL4	5365	PLXNB3	Human	RFU	Protein	20	S2
16923-20	3	SL008767	Profilin-2	Profilin II	P35080	5217	PFN2	Human	RFU	Protein	20	S1
16926-44	3	SL000255	Alkaline phosphatase, tissue-nonspecific isozyme	Alkaline phosphatase, liver	P05186	249	ALPL	Human	RFU	Protein	20	S2
16927-9	3	SL003003	Coagulation factor XIII	Coagulation factor XIII	P00488|P05160	2162|2165	F13A1|F13B	Human	RFU	Protein	20	S2
16932-5	3	SL000580	Estrogen sulfotransferase	SULT 1E	P49888	6783	SULT1E1	Human	RFU	Protein	20	S2
17138-8	3	SL005253	Glutathione S-transferase A1	GST A1-1	P08263	2938	GSTA1	Human	RFU	Protein	20	S1
17140-57	3	SL014328	Platelet-derived growth factor D	PDGFD	Q9GZP0	80310	PDGFD	Human	RFU	Protein	20	S2
17145-1	3	SL004832	Protein S100-A8/A9 heterodimer	S100A8/S100A9	P05109|P06702	6279|6280	S100A8|S100A9	Human	RFU	Protein	20	S2
17148-7	3	SL008080	Flavin reductase (NADPH)	BLVRB	P30043	645	BLVRB	Human	RFU	Protein	20	S2
17151-84	3	SL004509	Interferon regulatory factor 3	IRF-3	Q14653	3661	IRF3	Human	RFU	Protein	20	S2
17152-10	3	SL012437	Killer cell immunoglobulin-like receptor 2DS4	KI2S4	P43632	3809	KIR2DS4	Human	RFU	Protein	20	S1
17153-46	3	SL020993	Killer cell immunoglobulin-like receptor 2DL3	KI2L3	P43628	3804	KIR2DL3	Human	RFU	Protein	20	S1
17154-2	3	SL004780	Prostaglandin E synthase 3	TEBP	Q15185	10728	PTGES3	Human	RFU	Protein	20	S2
17156-72	3	SL006399	Serine/threonine-protein kinase DCLK1	DCAK1	O15075	9201	DCLK1	Human	RFU	Protein	20	S2
17158-17	3	SL019858	Ubiquitin-conjugating enzyme E2 G1	UB2G1	P62253	7326	UBE2G1	Human	RFU	Protein	20	S2
17161-1	3	SL016423	Dolichyl-diphosphooligosaccharide--protein glycosyltransferase 48 kDa subunit	OST48	P39656	1650	DDOST	Human	RFU	Protein	20	S2
17164-15	3	SL004211	Annexin A4	annexin IV	P09525	307	ANXA4	Human	RFU	Protein	20	S2
17165-1	3	SL003044	Beta-thromboglobulin	BTG	P02775	5473	PPBP	Human	RFU	Protein	20	S2
17166-4	3	SL014309	Fibroblast growth factor 8 isoform F	FGF-8F	P55075	2253	FGF8	Human	RFU	Protein	20	S1
17170-15	3	SL011502	Calcitonin gene-related peptide 2	CALCB	P10092	797	CALCB	Human	RFU	Protein	20	S2
17172-19	3	SL007073	Statherin	STAT	P02808	6779	STATH	Human	RFU	Protein	20	S2
17175-5	3	SL007270	Dual specificity mitogen-activated protein kinase kinase 6	MP2K6	P52564	5608	MAP2K6	Human	RFU	Protein	20	S1
17176-13	3	SL014348	PC4 and SFRS1-interacting protein	PSIP1	O75475	11168	PSIP1	Human	RFU	Protein	20	S2
17195-43	3	SL000023	BAG family molecular chaperone regulator 1	BAG-1	Q99933	573	BAG1	Human	RFU	Protein	20	S1
17196-5	3	SL011328	ATP-dependent Clp protease proteolytic subunit, mitochondrial	ClpP endopeptidase	Q16740	8192	CLPP	Human	RFU	Protein	20	S1
17199-43	3	SL021005	Hypoxia-inducible factor 1-alpha inhibitor	HIF1N	Q9NWT6	55662	HIF1AN	Human	RFU	Protein	20	S1
17200-50	3	SL020992	Killer cell immunoglobulin-like receptor 2DL1	KI2L1	P43626	3802	KIR2DL1	Human	RFU	Protein	20	S1
17202-37	3	SL011994	Programmed cell death protein 4	PDCD4	Q53EL6	27250	PDCD4	Human	RFU	Protein	20	S1
17204-17	3	SL013738	Phenylethanolamine N-methyltransferase	PNMT	P11086	5409	PNMT	Human	RFU	Protein	20	S2
17205-21	3	SL021017	Ras-related protein Rab-5A	RAB5A	P20339	5868	RAB5A	Human	RFU	Protein	20	S2
17209-27	3	SL020906	Sulfotransferase family cytosolic 2B member 1	ST2B1	O00204	6820	SULT2B1	Human	RFU	Protein	20	S1
17210-2	3	SL020926	T-cell leukemia/lymphoma protein 1A	TCL1A	P56279	8115	TCL1A	Human	RFU	Protein	20	S1
17224-12	3	SL008055	Mimecan	MIME	P20774	4969	OGN	Human	RFU	Protein	20	S2
17231-1	3	SL004609	Plastin-2	L-plastin	P13796	3936	LCP1	Human	RFU	Protein	20	S2
17319-1	3	SL006634	Selenoprotein H	SELH	Q8IZQ5	280636	SELENOH	Human	RFU	Protein	20	S1
17320-19	3	SL013281	L-aminoadipate-semialdehyde dehydrogenase-phosphopantetheinyl transferase	ADPPT	Q9NRN7	60496	AASDHPPT	Human	RFU	Protein	20	S2
17325-10	3	SL014982	Guanylate kinase	KGUA	Q16774	2987	GUK1	Human	RFU	Protein	20	S2
17326-44	3	SL019563	Dual specificity protein phosphatase 23	DUS23	Q9BVJ7	54935	DUSP23	Human	RFU	Protein	20	S1
17327-3	3	SL017270	Protein canopy homolog 3	CNPY3	Q9BT09	10695	CNPY3	Human	RFU	Protein	20	S2
17329-2	3	SL009125	3-hydroxybutyrate dehydrogenase type 2	BDH2	Q9BUT1	56898	BDH2	Human	RFU	Protein	20	S2
17331-138	3	SL008768	Kremen protein 1	KREM1	Q96MU8	83999	KREMEN1	Human	RFU	Protein	20	S2
17332-3	3	SL018690	Poly(ADP-ribose) glycohydrolase ARH3	ARHL2	Q9NX46	54936	ADPRS	Human	RFU	Protein	20	S2
17333-20	3	SL008026	Medium-chain specific acyl-CoA dehydrogenase, mitochondrial	ACADM	P11310	34	ACADM	Human	RFU	Protein	20	S1
17335-18	3	SL009105	Vesicle-associated membrane protein 2	VAMP2	P63027	6844	VAMP2	Human	RFU	Protein	20	S1
17336-54	3	SL019427	Cyclic AMP-responsive element-binding protein 3-like protein 2	CR3L2	Q70SY1	64764	CREB3L2	Human	RFU	Protein	20	S1
17337-1	3	SL007165	Transcriptional repressor protein YY1	TYY1	P25490	7528	YY1	Human	RFU	Protein	20	S2
17341-89	3	SL010906	Acetyl-CoA acetyltransferase, cytosolic	THIC	Q9BWD1	39	ACAT2	Human	RFU	Protein	20	S1
17342-13	3	SL012732	Anterior gradient protein 3	AGR3	Q8TD06	155465	AGR3	Human	RFU	Protein	20	S2
17343-6	3	SL019113	Syntaphilin	SNPH	O15079	9751	SNPH	Human	RFU	Protein	20	S1
17344-23	3	SL018388	Stomatin-like protein 1	STML1	Q9UBI4	9399	STOML1	Human	RFU	Protein	20	S2
17345-12	3	SL020272	Prostaglandin reductase 3	ZADH2	Q8N4Q0	284273	ZADH2	Human	RFU	Protein	20	S1
17346-61	3	SL012716	Follicular dendritic cell secreted peptide	FDSCP	Q8NFU4	260436	FDCSP	Human	RFU	Protein	20	S1
17347-80	3	SL011281	Axin interactor, dorsalization-associated protein	CA080	Q96BJ3	64853	AIDA	Human	RFU	Protein	20	S2
17348-5	3	SL018443	Synaptojanin-2-binding protein	SYJ2B	P57105	55333	SYNJ2BP	Human	RFU	Protein	20	S2
17350-13	3	SL009112	Charged multivesicular body protein 2b	CHM2B	Q9UQN3	25978	CHMP2B	Human	RFU	Protein	20	S1
17355-56	3	SL019674	Synaptotagmin-4	SYT4	Q9H2B2	6860	SYT4	Human	RFU	Protein	20	S2
17356-34	3	SL007561	Interleukin-1 family member 10	IL1FA	Q8WWZ1	84639	IL1F10	Human	RFU	Protein	20	S1
17357-33	3	SL020889	O-phosphoseryl-tRNA(Sec) selenium transferase	SPCS	Q9HD40	51091	SEPSECS	Human	RFU	Protein	20	S1
17362-5	3	SL013777	Von Hippel-Lindau disease tumor suppressor	VHL	P40337	7428	VHL	Human	RFU	Protein	20	S2
17364-8	3	SL020890	U2 small nuclear ribonucleoprotein B''	RU2B	P08579	6629	SNRPB2	Human	RFU	Protein	20	S2
17365-7	3	SL016564	Kynurenine--oxoglutarate transaminase 1	KAT1	Q16773	883	KYAT1	Human	RFU	Protein	20	S1
17366-6	3	SL010950	DCN1-like protein 1	DCNL1	Q96GG9	54165	DCUN1D1	Human	RFU	Protein	20	S2
17367-5	3	SL004916	Stathmin	Stathmin	P16949	3925	STMN1	Human	RFU	Protein	20	S2
17370-186	3	SL009448	Mycophenolic acid acyl-glucuronide esterase, mitochondrial	ABHDA	Q9NUJ1	55347	ABHD10	Human	RFU	Protein	20	S2
17372-5	3	SL010108	Eukaryotic translation initiation factor 4E-binding protein 1	4EBP1	Q13541	1978	EIF4EBP1	Human	RFU	Protein	20	S2
17377-1	3	SL005693	Aldo-keto reductase family 1 member C3	Aldose reductase-like C3	P42330	8644	AKR1C3	Human	RFU	Protein	20	S2
17380-2	3	SL013054	Ubiquitin-conjugating enzyme E2 K	UBE2K	P61086	3093	UBE2K	Human	RFU	Protein	20	S2
17383-4	3	SL019784	StAR-related lipid transfer protein 5	STAR5	Q9NSY2	80765	STARD5	Human	RFU	Protein	20	S2
17384-110	3	SL008016	ATP-dependent 6-phosphofructokinase, muscle type	K6PF	P08237	5213	PFKM	Human	RFU	Protein	20	S2
17387-27	3	SL004545	NF-kappa-B inhibitor beta	IKB-beta	Q15653	4793	NFKBIB	Human	RFU	Protein	20	S1
17391-10	3	SL015530	Splicing factor 45	SPF45	Q96I25	84991	RBM17	Human	RFU	Protein	20	S2
17393-13	3	SL005672	Short-chain specific acyl-CoA dehydrogenase, mitochondrial	SCAD	P16219	35	ACADS	Human	RFU	Protein	20	S1
17396-23	3	SL008013	Alcohol dehydrogenase 1A	ADH1A	P07327	124	ADH1A	Human	RFU	Protein	20	S2
17397-8	3	SL012708	Estradiol 17-beta-dehydrogenase 11	DHB11	Q8NBQ5	51170	HSD17B11	Human	RFU	Protein	20	S1
17398-55	3	SL004627	Heme oxygenase 1	HO-1	P09601	3162	HMOX1	Human	RFU	Protein	20	S2
17400-71	3	SL019729	Acyl-coenzyme A thioesterase 8	ACOT8	O14734	10005	ACOT8	Human	RFU	Protein	20	S2
17403-14	3	SL006190	Short/branched chain specific acyl-CoA dehydrogenase, mitochondrial	acyl-Coenzyme A dehydrogenase	P45954	36	ACADSB	Human	RFU	Protein	20	S1
17404-5	3	SL019712	ADP-ribosylation factor-like protein 5B	ARL5B	Q96KC2	221079	ARL5B	Human	RFU	Protein	20	S2
17405-2	3	SL007789	Ubiquitin carboxyl-terminal hydrolase isozyme L5	UCHL5	Q9Y5K5	51377	UCHL5	Human	RFU	Protein	20	S2
17408-2	3	SL020888	Phosphomannomutase 1	PMM1	Q92871	5372	PMM1	Human	RFU	Protein	20	S1
17410-5	3	SL019878	Centrin-3	CETN3	O15182	1070	CETN3	Human	RFU	Protein	20	S2
17411-55	3	SL015528	Ubiquitin recognition factor in ER-associated degradation protein 1	UFD1	Q92890	7353	UFD1	Human	RFU	Protein	20	S2
17419-17	3	SL013289	Testin	TES	Q9UGI8	26136	TES	Human	RFU	Protein	20	S1
17427-26	3	SL018773	Neuroligin-3	NLGN3	Q9NZ94	54413	NLGN3	Human	RFU	Protein	20	S2
17432-25	3	SL020885	Adenylate kinase 4, mitochondrial	KAD4	P27144	205	AK4	Human	RFU	Protein	20	S2
17435-43	3	SL008038	Electron transfer flavoprotein subunit alpha, mitochondrial	ETFA	P13804	2108	ETFA	Human	RFU	Protein	20	S2
17436-193	3	SL010497	Casein kinase I isoform gamma-2	CSNK1G2	P78368	1455	CSNK1G2	Human	RFU	Protein	20	S2
17441-4	3	SL002514	Intestinal-type alkaline phosphatase	Alkaline phosphatase, intestine	P09923	248	ALPI	Human	RFU	Protein	20	S1
17447-52	3	SL008544	Secreted frizzled-related protein 4	SFRP4	Q6FHJ7	6424	SFRP4	Human	RFU	Protein	20	S2
17449-23	3	SL008836	CD9 antigen	CD9	P21926	928	CD9	Human	RFU	Protein	20	S1
17450-51	3	SL006248	Histidine--tRNA ligase, cytoplasmic	Histidyl-tRNA synthetase	P12081	3035	HARS1	Human	RFU	Protein	20	S2
17453-34	3	SL000351	Ceruloplasmin	Ceruloplasmin	P00450	1356	CP	Human	RFU	Protein	20	S2
17454-15	3	SL006311	Epidermal growth factor-like protein 6	EGFL6	Q8IUX8	25975	EGFL6	Human	RFU	Protein	20	S1
17455-42	3	SL009337	Folate receptor alpha	FOLR1	P15328	2348	FOLR1	Human	RFU	Protein	20	S2
17456-53	3	SL010628	Golgi membrane protein 1	GOLM1	Q8NBJ4	51280	GOLM1	Human	RFU	Protein	20	S2
17460-51	3	SL004388	Interferon-induced GTP-binding protein Mx1	Mx1	P20591	4599	MX1	Human	RFU	Protein	20	S2
17462-19	3	SL007108	Interferon regulatory factor 1	IRF1	P10914	3659	IRF1	Human	RFU	Protein	20	S1
17466-72	3	SL008274	Acyl-CoA synthetase family member 2, mitochondrial	ACSF2	Q96CM8	80221	ACSF2	Human	RFU	Protein	20	S1
17467-1	3	SL015172	Dehydrogenase/reductase SDR family member 9	DHRS9	Q9BPW9	10170	DHRS9	Human	RFU	Protein	20	S2
17468-1	3	SL019429	Suppressor of fused homolog	SUFU	Q9UMX1	51684	SUFU	Human	RFU	Protein	20	S1
17474-106	3	SL020114	YEATS domain-containing protein 4	YETS4	O95619	8089	YEATS4	Human	RFU	Protein	20	S1
17475-18	3	SL010511	Lymphokine-activated killer T-cell-originated protein kinase	TOPK	Q96KB5	55872	PBK	Human	RFU	Protein	20	S1
17490-4	3	SL004824	SH3 domain-binding glutamic acid-rich-like protein 3	SH3BGRL3-like protein	Q9H299	83442	SH3BGRL3	Human	RFU	Protein	20	S2
17495-141	3	SL018569	NAD-dependent protein deacetylase sirtuin-3, mitochondrial	SIR3	Q9NTG7	23410	SIRT3	Human	RFU	Protein	20	S1
17505-125	3	SL019672	N-acetylated-alpha-linked acidic dipeptidase-like protein	NALDL	Q9UQQ1	10004	NAALADL1	Human	RFU	Protein	20	S2
17509-6	3	SL008852	4-hydroxyphenylpyruvate dioxygenase	HPPD	P32754	3242	HPD	Human	RFU	Protein	20	S2
17510-7	3	SL013036	Signal recognition particle 14 kDa protein	SRP14	P37108	6727	SRP14	Human	RFU	Protein	20	S1
17511-10	3	SL020930	Ribonuclease P protein subunit p30	RPP30	P78346	10556	RPP30	Human	RFU	Protein	20	S1
17512-2	3	SL007402	N-myc-interactor	NMI	Q13287	9111	NMI	Human	RFU	Protein	20	S2
17513-11	3	SL008121	Annexin A11	ANX11	P50995	311	ANXA11	Human	RFU	Protein	20	S2
17514-48	3	SL008443	Ras-related protein Rab-21	RAB21	Q9UL25	23011	RAB21	Human	RFU	Protein	20	S2
17516-7	3	SL000562	Ras-related protein Rab-3A	Rab3A	P20336	5864	RAB3A	Human	RFU	Protein	20	S2
17671-58	3	SL019227	Inhibitor of growth protein 4	ING4	Q9UNL4	51147	ING4	Human	RFU	Protein	20	S2
17672-184	3	SL006288	Gastric intrinsic factor	Gastric intrinsic factor	P27352	2694	CBLIF	Human	RFU	Protein	20	S1
17673-34	3	SL011748	Carbonic anhydrase 5B, mitochondrial	Carbonic Anhydrase VB	Q9Y2D0	11238	CA5B	Human	RFU	Protein	20	S1
17675-17	3	SL019552	Acyl-coenzyme A thioesterase 13	ACO13	Q9NPJ3	55856	ACOT13	Human	RFU	Protein	20	S2
17676-13	3	SL011229	Cdc42-interacting protein 4	CIP4	Q15642	9322	TRIP10	Human	RFU	Protein	20	S2
17678-28	3	SL006796	V-set and immunoglobulin domain-containing protein 4	VSIG4	Q9Y279	11326	VSIG4	Human	RFU	Protein	20	S2
17680-12	3	SL016438	Ephrin type-B receptor 1	EPHB1	P54762	2047	EPHB1	Human	RFU	Protein	20	S2
[truncated: 5,030 more rows]

## Sheet: Table S2
Table S2. Annotation of aptamers from the SOMAscan 5k assay.
SeqId	SOMA_SEQ_ID	ORGANISM	TARGET_GENE_ID	TARGET_GENE_SYMBOL	DESCRIPTION_HH	UniProt		Data Dictionary
10000-28	10000-28_3	Human	1415	CRYBB2	crystallin, beta B2	P43320		SeqID	Somalogic-supplied aptamer ID
10001-7	10001-7_3	Human	5894	RAF1	v-raf-1 murine leukemia viral oncogene homolog 1	P04049		SOMA_SEQ_ID	SeqID with aptamer version number
10003-15	10003-15_3	Human	7592	ZNF41	zinc finger protein 41	P51814		TARGET_GENE_ID	Entrez ID of the gene corresponding to the targeted protein
10006-25	10006-25_3	Human	2002	ELK1	ELK1, member of ETS oncogene family	P19419		TARGET_GENE_SYMBOL	Entrez symbol of the gene corresponding to the targeted protein
10008-43	10008-43_3	Human	2978	GUCA1A	guanylate cyclase activator 1A (retina)	P43080		DESCRIPTION_HH	Full name of the targeted protein
10011-65	10011-65_3	Human	4952	OCRL	oculocerebrorenal syndrome of Lowe	Q01968		UniProt	UniProt ID of the targeted protein
10012-5	10012-5_3	Human	25803	SPDEF	SAM pointed domain containing ets transcription factor	O95238
10014-31	10014-31_3	Human	6591	SNAI2	snail homolog 2 (Drosophila)	O43623
10015-119	10015-119_3	Human	8514	KCNAB2	potassium voltage-gated channel, shaker-related subfamily, beta member 2	Q13303
10022-207	10022-207_3	Human	5429	POLH	polymerase (DNA directed), eta	Q9Y253
10023-32	10023-32_3	Human	7421	VDR	vitamin D (1,25- dihydroxyvitamin D3) receptor	P11473
10024-44	10024-44_3	Human	112817	HOGA1	4-hydroxy-2-oxoglutarate aldolase 1	Q86XE5
10030-8	10030-8_3	Human	4595	MUTYH	mutY homolog (E. coli)	Q9UIF7
10035-6	10035-6_3	Human	1846	DUSP4	dual specificity phosphatase 4	Q13115
10036-201	10036-201_3	Human	23051	ZHX3	zinc fingers and homeoboxes 3	Q9H4I2
10037-98	10037-98_3	Human	89858	SIGLEC12	sialic acid binding Ig-like lectin 12 (gene/pseudogene)	Q96PQ1
10040-63	10040-63_3	Human	8626	TP63	tumor protein p63	Q9H3D4
10041-3	10041-3_3	Human	3172	HNF4A	hepatocyte nuclear factor 4, alpha	P41235
10042-8	10042-8_3	Human	23678	SGK3	serum/glucocorticoid regulated kinase family, member 3	Q96BR1
10043-31	10043-31_3	Human	23476	BRD4	bromodomain containing 4	O60885
10044-12	10044-12_3	Human	80326	WNT10A	wingless-type MMTV integration site family, member 10A	Q9GZT5
10045-47	10045-47_3	Human	8452	CUL3	cullin 3	Q13618
10046-55	10046-55_3	Human	329	BIRC2	baculoviral IAP repeat containing 2	Q13490
10047-12	10047-12_3	Human	4688	NCF2	neutrophil cytosolic factor 2	P19878
10048-7	10048-7_3	Human	865	CBFB	core-binding factor, beta subunit	Q13951
10049-112	10049-112_3	Human	7013	TERF1	telomeric repeat binding factor (NIMA-interacting) 1	P54274
10053-5	10053-5_3	Human	3611	ILK	integrin-linked kinase	Q13418
10054-3	10054-3_3	Human	8139	GAN	gigaxonin	Q9H2C0
10056-5	10056-5_3	Human	2305	FOXM1	forkhead box M1	Q08050
10058-1	10058-1_3	Human	5886	RAD23A	RAD23 homolog A (S. cerevisiae)	P54725
10063-10	10063-10_3	Human	55120	FANCL	Fanconi anemia, complementation group L	Q9NW38
10064-12	10064-12_3	Human	10741	RBBP9	retinoblastoma binding protein 9	O75884
10070-22	10070-22_3	Human	5336	PLCG2	phospholipase C, gamma 2 (phosphatidylinositol-specific)	P16885
10073-22	10073-22_3	Human	55775	TDP1	tyrosyl-DNA phosphodiesterase 1	Q9NUW8
10074-128	10074-128_3	Human	6046	BRD2	bromodomain containing 2	P25440
10075-75	10075-75_3	Human	84320	ACBD6	acyl-CoA binding domain containing 6	Q9BR61
10076-1	10076-1_3	Human	9179	AP4M1	adaptor-related protein complex 4, mu 1 subunit	O00189
10078-5	10078-5_3	Human	9531	BAG3	BCL2-associated athanogene 3	O95817
10080-9	10080-9_3	Human	1967	EIF2B1	eukaryotic translation initiation factor 2B, subunit 1 alpha, 26kDa	Q14232
10081-17	10081-17_3	Human	23314	SATB2	SATB homeobox 2	Q9UPW6
10082-251	10082-251_3	Human	4747	NEFL	neurofilament, light polypeptide	P07196
10085-25	10085-25_3	Human	6770	STAR	steroidogenic acute regulatory protein	P49675
10086-39	10086-39_3	Human	875	CBS	cystathionine-beta-synthase	P35520
10087-10	10087-10_3	Human	1409	CRYAA	crystallin, alpha A	P02489
10088-37	10088-37_3	Human	353	APRT	adenine phosphoribosyltransferase	P07741
10089-7	10089-7_3	Human	8623	ASMTL	acetylserotonin O-methyltransferase-like	O95671
10336-3	10336-3_3	Human	10273	STUB1	STIP1 homology and U-box containing protein 1, E3 ubiquitin protein ligase	Q9UNE7
10339-48	10339-48_3	Human	2026	ENO2	enolase 2 (gamma, neuronal)	P09104
10342-55	10342-55_3	Human	51588	PIAS4	protein inhibitor of activated STAT, 4	Q8N2W9
10344-334	10344-334_3	Human	3587	IL10RA	interleukin 10 receptor, alpha	Q13651
10346-5	10346-5_3	Human	6774	STAT3	signal transducer and activator of transcription 3 (acute-phase response factor)	P40763
10356-21	10356-21_3	Human	3725	JUN	jun proto-oncogene	P05412
10361-25	10361-25_3	Human	4938	OAS1	2'-5'-oligoadenylate synthetase 1, 40/46kDa	P00973
10362-35	10362-35_3	Human	4609	MYC	v-myc myelocytomatosis viral oncogene homolog (avian)	P01106
10363-13	10363-13_3	Human	4088	SMAD3	SMAD family member 3	P84022
10364-6	10364-6_3	Human	4087	SMAD2	SMAD family member 2	Q15796
10365-132	10365-132_3	Human	3593	IL12B	interleukin 12B (natural killer cell stimulatory factor 2, cytotoxic lymphocyte maturation factor 2, p40)	P29460|Q9NPF7
10365-132	10365-132_3	Human	51561	IL23A	interleukin 23, alpha subunit p19	P29460|Q9NPF7
10366-11	10366-11_3	Human	5156	PDGFRA	platelet-derived growth factor receptor, alpha polypeptide	P16234
10367-62	10367-62_3	Human	3592	IL12A	interleukin 12A (natural killer cell stimulatory factor 1, cytotoxic lymphocyte maturation factor 1, p35)	P29459|P29460
10367-62	10367-62_3	Human	3593	IL12B	interleukin 12B (natural killer cell stimulatory factor 2, cytotoxic lymphocyte maturation factor 2, p40)	P29459|P29460
10370-21	10370-21_3	Human	6772	STAT1	signal transducer and activator of transcription 1, 91kDa	P42224
10372-18	10372-18_3	Human	6778	STAT6	signal transducer and activator of transcription 6, interleukin-4 induced	P42226
10390-21	10390-21_3	Human	84133	ZNRF3	zinc and ring finger 3	Q9ULT6
10391-1	10391-1_3	Human	27329	ANGPTL3	angiopoietin-like 3	Q9Y5C1
10396-6	10396-6_3	Human	4170	MCL1	myeloid cell leukemia sequence 1 (BCL2-related)	Q07820
10418-36	10418-36_3	Human	23673	STX12	syntaxin 12	Q86Y82
10419-1	10419-1_3	Human	286133	SCARA5	scavenger receptor class A, member 5 (putative)	Q6ZMJ2
10424-31	10424-31_3	Human	56654	NPDC1	neural proliferation, differentiation and control, 1	Q9NQX5
10425-3	10425-3_3	Human	9334	B4GALT5	UDP-Gal:betaGlcNAc beta 1,4- galactosyltransferase, polypeptide 5	O43286
10426-21	10426-21_3	Human	9570	GOSR2	golgi SNAP receptor complex member 2	O14653
10428-1	10428-1_3	Human	100132285	KIR2DS2	killer cell immunoglobulin-like receptor, two domains, short cytoplasmic tail, 2	P43631
10430-31	10430-31_3	Human	6520	SLC3A2	solute carrier family 3 (activators of dibasic and neutral amino acid transport), member 2	P08195
10432-3	10432-3_3	Human	85352	KIAA1644	KIAA1644	Q3SXP7
10435-2	10435-2_3	Human	175	AGA	aspartylglucosaminidase	P20933
10438-19	10438-19_3	Human	1438	CSF2RA	colony stimulating factor 2 receptor, alpha, low-affinity (granulocyte-macrophage)	P15509
10440-26	10440-26_3	Human	79827	CLMP	CXADR-like membrane protein	Q9H6B4
10442-1	10442-1_3	Human	147744	TMEM190	transmembrane protein 190	Q8WZ59
10445-20	10445-20_3	Human	55937	APOM	apolipoprotein M	O95445
10447-18	10447-18_3	Human	5042	PABPC3	poly(A) binding protein, cytoplasmic 3	Q9H361
10449-31	10449-31_3	Human	387914	SHISA2	shisa homolog 2 (Xenopus laevis)	Q6UWI4
10451-11	10451-11_3	Human	4924	NUCB1	nucleobindin 1	Q02818
10453-7	10453-7_3	Human	125931	CEACAM20	carcinoembryonic antigen-related cell adhesion molecule 20	Q6UY09
10454-99	10454-99_3	Human	23341	DNAJC16	DnaJ (Hsp40) homolog, subfamily C, member 16	Q9Y2G8
10455-196	10455-196_3	Human	386653	IL31	interleukin 31	Q6EBC2
10462-14	10462-14_3	Human	10022	INSL5	insulin-like 5	Q9Y5Q6
10464-6	10464-6_3	Human	84168	ANTXR1	anthrax toxin receptor 1	Q9H6X2
10485-56	10485-56_3	Human	4103	MAGEA4	melanoma antigen family A, 4	P43358
10490-3	10490-3_3	Human	6184	RPN1	ribophorin I	P04843
10496-11	10496-11_3	Human	1179	CLCA1	chloride channel accessory 1	A8K7I4
10499-1	10499-1_3	Human	113277	TMEM106A	transmembrane protein 106A	Q96A25
10506-53	10506-53_3	Human	10424	PGRMC2	progesterone receptor membrane component 2	O15173
10507-166	10507-166_3	Human	56	ACRV1	acrosomal vesicle protein 1	P26436
10510-62	10510-62_3	Human	388325	SCIMP	chromosome 17 open reading frame 87	Q6UWF3
10511-10	10511-10_3	Human	1293	COL6A3	collagen, type VI, alpha 3	P12111
10512-13	10512-13_3	Human	1439	CSF2RB	colony stimulating factor 2 receptor, beta, low-affinity (granulocyte-macrophage)	P32927
10513-13	10513-13_3	Human	30818	KCNIP3	Kv channel interacting protein 3, calsenilin	Q9Y2W7
10514-5	10514-5_3	Human	5730	PTGDS	prostaglandin D2 synthase 21kDa (brain)	P41222
10521-10	10521-10_3	Human	54587	MXRA8	matrix-remodelling associated 8	Q9BRK3
10527-22	10527-22_3	Human	1660	DHX9	DEAH (Asp-Glu-Ala-His) box polypeptide 9	Q08211
10530-8	10530-8_3	Human	5694	PSMB6	proteasome (prosome, macropain) subunit, beta type, 6	P28072
10531-18	10531-18_3	Human	4893	NRAS	neuroblastoma RAS viral (v-ras) oncogene homolog	P01111
10534-40	10534-40_3	Human	142	PARP1	poly (ADP-ribose) polymerase 1	P09874
10535-25	10535-25_3	Human	1339	COX6A2	cytochrome c oxidase subunit VIa polypeptide 2	Q02221
10539-30	10539-30_3	Human	83692	CD99L2	CD99 molecule-like 2	Q8TCZ2
10546-2	10546-2_3	Human	54084	TSPEAR	thrombospondin-type laminin G domain and EAR repeats	Q8WU66
10550-37	10550-37_3	Human	658	BMPR1B	bone morphogenetic protein receptor, type IB	O00238
10551-7	10551-7_3	Human	27040	LAT	linker for activation of T cells	O43561
10552-88	10552-88_3	Human	8302	KLRC4	killer cell lectin-like receptor subfamily C, member 4	O43908
10553-8	10553-8_3	Human	163590	TOR1AIP2	torsin A interacting protein 2	Q8NFQ8
10554-23	10554-23_3	Human	2720	GLB1	galactosidase, beta 1	P16278
10557-6	10557-6_3	Human	121793	TEX29	chromosome 13 open reading frame 16	Q8N6K0
10558-26	10558-26_3	Human	5101	PCDH9	protocadherin 9	Q9HC56
10560-1	10560-1_3	Human	81618	ITM2C	integral membrane protein 2C	Q9NQX7
10561-5	10561-5_3	Human	114771	PGLYRP3	peptidoglycan recognition protein 3	Q96LB9
10562-42	10562-42_3	Human	81831	NETO2	neuropilin (NRP) and tolloid (TLL)-like 2	Q8NC67
10563-13	10563-13_3	Human	116068	LYSMD3	LysM, putative peptidoglycan-binding, domain containing 3	Q7Z3D4
10565-19	10565-19_3	Human	22865	SLITRK3	SLIT and NTRK-like family, member 3	O94933
10571-14	10571-14_3	Human	4245	MGAT1	mannosyl (alpha-1,3-)-glycoprotein beta-1,2-N-acetylglucosaminyltransferase	P26572
10572-65	10572-65_3	Human	10047	CST8	cystatin 8 (cystatin-related epididymal specific)	O60676
10575-31	10575-31_3	Human	22827	PUF60	poly-U binding splicing factor 60KDa	Q9UHX1
10580-14	10580-14_3	Human	389376	SFTA2	surfactant associated 2	Q6UW10
10582-36	10582-36_3	Human	84197	POMK	protein kinase-like protein SgK196	Q9H5K3
10583-1	10583-1_3	Human	66000	TMEM108	transmembrane protein 108	Q6UXF1
10584-7	10584-7_3	Human	4724	NDUFS4	NADH dehydrogenase (ubiquinone) Fe-S protein 4, 18kDa (NADH-coenzyme Q reductase)	O43181
10588-39	10588-39_3	Human	8869	ST3GAL5	ST3 beta-galactoside alpha-2,3-sialyltransferase 5	Q9UNP4
10589-7	10589-7_3	Human	154064	RAET1L	retinoic acid early transcript 1L	Q5VY80
10600-24	10600-24_3	Human	1047	CLGN	calmegin	O14967
10603-1	10603-1_3	Human	3347	HTN3	histatin 3	P15516
10605-22	10605-22_3	Human	57136	APMAP	chromosome 20 open reading frame 3	Q9HDC9
10606-34	10606-34_3	Human	26092	TOR1AIP1	torsin A interacting protein 1	Q5JTV8
10608-9	10608-9_3	Human	3346	HTN1	histatin 1	P15515
10612-18	10612-18_3	Human	8985	PLOD3	procollagen-lysine, 2-oxoglutarate 5-dioxygenase 3	O60568
10613-33	10613-33_3	Human	113201	CASC4	cancer susceptibility candidate 4	Q6P4E1
10615-18	10615-18_3	Human	4359	MPZ	myelin protein zero	P25189
10616-67	10616-67_3	Human	50512	PODXL2	podocalyxin-like 2	Q9NZ53
10618-190	10618-190_3	Human	4036	LRP2	low density lipoprotein receptor-related protein 2	P98164
10620-21	10620-21_3	Human	4477	MSMB	microseminoprotein, beta-	P08118
10621-26	10621-26_3	Human	51334	PRR16	proline rich 16	Q569H4
10623-19	10623-19_3	Human	4582	MUC1	mucin 1, cell surface associated	P15941
10624-45	10624-45_3	Human	153218	SPINK13	serine peptidase inhibitor, Kazal type 13 (putative)	Q1W4C9
10627-87	10627-87_3	Human	334	APLP2	amyloid beta (A4) precursor-like protein 2	Q06481
10630-5	10630-5_3	Human	10553	HTATIP2	HIV-1 Tat interactive protein 2, 30kDa	Q9BUP3
10637-50	10637-50_3	Human	57535	KIAA1324	KIAA1324	Q6UXG2
10638-1	10638-1_3	Human	26277	TINF2	TERF1 (TRF1)-interacting nuclear factor 2	Q9BSI4
10643-16	10643-16_3	Human	118427	OLFM3	olfactomedin 3	Q96PB7
10647-18	10647-18_3	Human	51008	ASCC1	activating signal cointegrator 1 complex subunit 1	Q8N9N2
10663-42	10663-42_3	Human	3638	INSIG1	insulin induced gene 1	O15503
10666-7	10666-7_3	Human	84572	GNPTG	N-acetylglucosamine-1-phosphate transferase, gamma subunit	Q9UJJ9
10667-78	10667-78_3	Human	284546	C1orf185	chromosome 1 open reading frame 185	Q5T7R7
10668-5	10668-5_3	Human	6810	STX4	syntaxin 4	Q12846
10672-75	10672-75_3	Human	6439	SFTPB	surfactant protein B	P07988
10675-223	10675-223_3	Human	51075	TMX2	thioredoxin-related transmembrane protein 2	Q9Y320
10677-9	10677-9_3	Human	4710	NDUFB4	NADH dehydrogenase (ubiquinone) 1 beta subcomplex, 4, 15kDa	O95168
10693-43	10693-43_3	Human	346689	KLRG2	killer cell lectin-like receptor subfamily G, member 2	A4D1S0
10695-12	10695-12_3	Human	280664	WFDC10B	WAP four-disulfide core domain 10B	Q8IUB3
10699-52	10699-52_3	Human	89790	SIGLEC10	sialic acid binding Ig-like lectin 10	Q07954
10700-10	10700-10_3	Human	152404	IGSF11	immunoglobulin superfamily, member 11	Q5DX21
10702-1	10702-1_3	Human	340267	COL28A1	collagen, type XXVIII, alpha 1	Q2UY09
10703-203	10703-203_3	Human	64426	SUDS3	suppressor of defective silencing 3 homolog (S. cerevisiae)	Q9H7L9
10704-91	10704-91_3	Human	4033	LRMP	lymphoid-restricted membrane protein	Q12912
10705-14	10705-14_3	Human	256435	ST6GALNAC3	ST6 (alpha-N-acetyl-neuraminyl-2,3-beta-galactosyl-1,3)-N-acetylgalactosaminide alpha-2,6-sialyltransferase 3	Q8NDV1
10708-3	10708-3_3	Human	2797	GNRH2	gonadotropin-releasing hormone 2	O43555
10710-23	10710-23_3	Human	124626	ZPBP2	zona pellucida binding protein 2	Q6X784
10713-151	10713-151_3	Human	124599	CD300LB	CD300 molecule-like family member b	A8K4G0
10714-7	10714-7_3	Human	1636	ACE	angiotensin I converting enzyme (peptidyl-dipeptidase A) 1	P12821
10716-35	10716-35_3	Human	5711	PSMD5	proteasome (prosome, macropain) 26S subunit, non-ATPase, 5	Q16401
10722-13	10722-13_3	Human	6850	SYK	spleen tyrosine kinase	P43405
10731-10	10731-10_3	Human	222537	HS3ST5	heparan sulfate (glucosamine) 3-O-sulfotransferase 5	Q8IZT8
10734-339	10734-339_3	Human	64090	GAL3ST2	galactose-3-O-sulfotransferase 2	Q9H3Q3
10737-96	10737-96_3	Human	1992	SERPINB1	serpin peptidase inhibitor, clade B (ovalbumin), member 1	P30740
10748-216	10748-216_3	Human	56133	PCDHB2	protocadherin beta 2	Q9Y5E7
10752-8	10752-8_3	Human	124359	CDYL2	chromodomain protein, Y-like 2	Q8N8U2
10753-31	10753-31_3	Human	8756	ADAM7	ADAM metallopeptidase domain 7	Q9H2U9
10754-113	10754-113_3	Human	60675	PROK2	prokineticin 2	Q9HC23
10756-34	10756-34_3	Human	114131	UCN3	urocortin 3 (stresscopin)	Q969E3
10758-2	10758-2_3	Human	11081	KERA	keratocan	O60938
10760-107	10760-107_3	Human	2893	GRIA4	glutamate receptor, ionotrophic, AMPA 4	P48058
10761-5	10761-5_3	Human	10959	TMED2	transmembrane emp24 domain trafficking protein 2	Q15363
10762-2	10762-2_3	Human	346689	KLRG2	killer cell lectin-like receptor subfamily G, member 2	A4D1S0
10767-52	10767-52_3	Human	10149	ADGRG2	G protein-coupled receptor 64	Q8IZP9
10772-21	10772-21_3	Human	55454	CSGALNACT2	chondroitin sulfate N-acetylgalactosaminyltransferase 2	Q8N6G5
10781-19	10781-19_3	Human	339390	CLEC4G	C-type lectin domain family 4, member G	Q6UXB4
10785-8	10785-8_3	Human	440699	LRRC52	leucine rich repeat containing 52	Q8N7C0
10798-4	10798-4_3	Human	342510	CD300E	CD300e molecule	Q496F6
10800-15	10800-15_3	Human	871	SERPINH1	serpin peptidase inhibitor, clade H (heat shock protein 47), member 1, (collagen binding protein 1)	P50454
10809-14	10809-14_3	Human	3820	KLRB1	killer cell lectin-like receptor subfamily B, member 1	Q12918
10814-7	10814-7_3	Human	909	CD1A	CD1a molecule	P06126
10815-2	10815-2_3	Human	22927	HABP4	hyaluronan binding protein 4	Q5JVS0
10816-150	10816-150_3	Human	29992	PILRA	paired immunoglobin-like type 2 receptor alpha	Q9UKJ1
10817-26	10817-26_3	Human	387990	TOMM20L	translocase of outer mitochondrial membrane 20 homolog (yeast)-like	Q6UXN7
10818-36	10818-36_3	Human	6609	SMPD1	sphingomyelin phosphodiesterase 1, acid lysosomal	P17405
10825-12	10825-12_3	Human	54621	VSIG10	V-set and immunoglobulin domain containing 10	Q8N0Z9
10827-67	10827-67_3	Human	645191	LINGO3	leucine rich repeat and Ig domain containing 3	P0C6S8
10830-5	10830-5_3	Human	9813	EFCAB14	KIAA0494	O75071
10832-24	10832-24_3	Human	9331	B4GALT6	UDP-Gal:betaGlcNAc beta 1,4- galactosyltransferase, polypeptide 6	Q9UBX8
10833-64	10833-64_3	Human	64399	HHIP	hedgehog interacting protein	Q96QV1
10835-25	10835-25_3	Human	51146	A4GNT	alpha-1,4-N-acetylglucosaminyltransferase	Q9UNA3
10842-7	10842-7_3	Human	51301	GCNT4	glucosaminyl (N-acetyl) transferase 4, core 2	Q9P109
10847-1	10847-1_3	Human	284266	SIGLEC15	sialic acid binding Ig-like lectin 15	Q6ZMC9
10848-137	10848-137_3	Human	10917	BTNL3	butyrophilin-like 3	Q6UXE8
10851-77	10851-77_3	Human	10148	EBI3	Epstein-Barr virus induced 3	Q14213
10852-114	10852-114_3	Human	9987	HNRNPDL	heterogeneous nuclear ribonucleoprotein D-like	O14979
10866-60	10866-60_3	Human	55671	PPP4R3A	SMEK homolog 1, suppressor of mek1 (Dictyostelium)	Q6IN85
10876-300	10876-300_3	Human	221927	BRAT1	BRCA1-associated ATM activator 1	Q6PJG6
10880-38	10880-38_3	Human	642968	FAM163B	family with sequence similarity 163, member B	P0C2L3
10882-12	10882-12_3	Human	1823	DSC1	desmocollin 1	Q08554
10885-36	10885-36_3	Human	221477	C6orf89	chromosome 6 open reading frame 89	Q6UWU4
10889-2	10889-2_3	Human	112609	MRAP2	melanocortin 2 receptor accessory protein 2	Q96G30
10890-135	10890-135_3	Human	197021	LCTL	lactase-like	Q6UWM7
10892-8	10892-8_3	Human	9180	OSMR	oncostatin M receptor	Q99650
10895-28	10895-28_3	Human	132724	TMPRSS11B	transmembrane protease, serine 11B	Q86T26
10900-272	10900-272_3	Human	11075	STMN2	stathmin-like 2	Q93045
10902-53	10902-53_3	Human	151516	ASPRV1	aspartic peptidase, retroviral-like 1	Q53RT3
10903-50	10903-50_3	Human	9482	STX8	syntaxin 8	Q9UNK0
10907-116	10907-116_3	Human	50863	NTM	neurotrimin	Q9P121
10908-2	10908-2_3	Human	114805	GALNT13	UDP-N-acetyl-alpha-D-galactosamine:polypeptide N-acetylgalactosaminyltransferase 13 (GalNAc-T13)	Q8IUC8
10910-6	10910-6_3	Human	1089	CEACAM4	carcinoembryonic antigen-related cell adhesion molecule 4	O75871
10916-44	10916-44_3	Human	22925	PLA2R1	phospholipase A2 receptor 1, 180kDa	Q13018
10917-40	10917-40_3	Human	2793	GNGT2	guanine nucleotide binding protein (G protein), gamma transducing activity polypeptide 2	O14610
10924-258	10924-258_3	Human	124936	CYB5D2	cytochrome b5 domain containing 2	Q8WUJ1
10933-107	10933-107_3	Human	83698	CALN1	calneuron 1	Q9BXU9
10938-13	10938-13_3	Human	965	CD58	CD58 molecule	P19256
10939-16	10939-16_3	Human	57664	PLEKHA4	pleckstrin homology domain containing, family A (phosphoinositide binding specific) member 4	Q9H4M7
10940-25	10940-25_3	Human	6345	SRL	sarcalumenin	Q86TD4
10945-11	10945-11_3	Human	10228	STX6	syntaxin 6	O43752
10948-14	10948-14_3	Human	23646	PLD3	phospholipase D family, member 3	Q8IV08
10949-59	10949-59_3	Human	6181	RPLP2	ribosomal protein, large, P2	P05387
10953-14	10953-14_3	Human	387836	CLEC2A	C-type lectin domain family 2, member A	Q6UVW9
10955-4	10955-4_3	Human	10462	CLEC10A	C-type lectin domain family 10, member A	Q8IUN9
10956-82	10956-82_3	Human	2653	GCSH	glycine cleavage system protein H (aminomethyl carrier)	P23434
10959-125	10959-125_3	Human	51272	BET1L	blocked early in transport 1 homolog (S. cerevisiae)-like	Q9NYM9
10961-15	10961-15_3	Human	5920	RARRES3	retinoic acid receptor responder (tazarotene induced) 3	Q9UL19
10974-20	10974-20_3	Human	84651	SPINK7	serine peptidase inhibitor, Kazal type 7 (putative)	P58062
10975-59	10975-59_3	Human	118430	MUCL1	mucin-like 1	Q96DR8
10977-55	10977-55_3	Human	221044	UCMA	upper zone of growth plate and cartilage matrix associated	Q8WVF2
10978-39	10978-39_3	Human	2689	GH2	growth hormone 2	P01242
10981-56	10981-56_3	Human	10718	NRG3	neuregulin 3	P56975
10990-21	10990-21_3	Human	120892	LRRK2	leucine-rich repeat kinase 2	Q5S007
11067-13	11067-13_3	Human	632	BGLAP	bone gamma-carboxyglutamate (gla) protein	P02818
11071-1	11071-1_3	Human	3567	IL5	interleukin 5 (colony-stimulating factor, eosinophil)	P05113
11089-7	11089-7_3	Human	3493	IGHA1	immunoglobulin heavy constant alpha 1	P01876|P01877
11089-7	11089-7_3	Human	3494	IGHA2	immunoglobulin heavy constant alpha 2 (A2m marker)	P01876|P01877
11089-7	11089-7_3	Human	3512	JCHAIN	immunoglobulin J polypeptide, linker protein for immunoglobulin alpha and mu polypeptides	P01876|P01877
11089-7	11089-7_3	Human	3535	IGL	immunoglobulin lambda locus	P01876|P01877
11089-7	11089-7_3	Human	50802	IGK	immunoglobulin kappa locus	P01876|P01877
11089-7	11089-7_3	Human	5284	PIGR	polymeric immunoglobulin receptor	P01876|P01877
11094-104	11094-104_3	Human	1178	CLC	Charcot-Leyden crystal protein	Q05315
11096-57	11096-57_3	Human	29104	N6AMT1	N-6 adenine-specific DNA methyltransferase 1 (putative)	Q9Y5N5
11098-1	11098-1_3	Human	8566	PDXK	pyridoxal (pyridoxine, vitamin B6) kinase	O00764
11101-18	11101-18_3	Human	7099	TLR4	toll-like receptor 4	O00206
11102-22	11102-22_3	Human	83998	REG4	regenerating islet-derived family, member 4	Q9BYZ8
11103-24	11103-24_3	Human	3315	HSPB1	heat shock 27kDa protein 1	P04792
11104-13	11104-13_3	Human	1116	CHI3L1	chitinase 3-like 1 (cartilage glycoprotein-39)	P36222
11105-171	11105-171_3	Human	2023	ENO1	enolase 1, (alpha)	P06733
11107-25	11107-25_3	Human	55714	TENM3	odz, odd Oz/ten-m homolog 3 (Drosophila)	Q9P273
11109-56	11109-56_3	Human	79987	SVEP1	sushi, von Willebrand factor type A, EGF and pentraxin domain containing 1	Q4LDE5
11110-4	11110-4_3	Human	338773	TMEM119	transmembrane protein 119	Q4V9L6
11112-18	11112-18_3	Human	153339	TMEM167A	transmembrane protein 167A	Q8TBQ9
11116-16	11116-16_3	Human	399947	C11orf87	chromosome 11 open reading frame 87	Q6NUJ2
11117-2	11117-2_3	Human	64847	SPATA20	spermatogenesis associated 20	Q8TB22
11118-107	11118-107_3	Human	64284	RAB17	RAB17, member RAS oncogene family	Q9H0T7
11120-49	11120-49_3	Human	57106	NAT14	N-acetyltransferase 14 (GCN5-related, putative)	Q8WUY8
11122-97	11122-97_3	Human	51324	SPG21	spastic paraplegia 21 (autosomal recessive, Mast syndrome)	Q9NZD8
11126-102	11126-102_3	Human	7204	TRIO	triple functional domain (PTPRF interacting)	O75962
11128-29	11128-29_3	Human	92293	TMEM132C	transmembrane protein 132C	Q8N3T6
11129-66	11129-66_3	Human	9210	BMP15	bone morphogenetic protein 15	O95972
11130-158	11130-158_3	Human	785	CACNB4	calcium channel, voltage-dependent, beta 4 subunit	O00305
11134-30	11134-30_3	Human	54516	MTRF1L	mitochondrial translational release factor 1-like	Q9UGC7
11135-5	11135-5_3	Human	128308	MRPL55	mitochondrial ribosomal protein L55	Q7Z7F7
11137-43	11137-43_3	Human	1439	CSF2RB	colony stimulating factor 2 receptor, beta, low-affinity (granulocyte-macrophage)	P32927
11138-16	11138-16_3	Human	864	RUNX3	runt-related transcription factor 3	Q13761
11140-56	11140-56_3	Human	1277	COL1A1	collagen, type I, alpha 1	P02452
11142-11	11142-11_3	Human	9068	ANGPTL1	angiopoietin-like 1	O95841
11143-32	11143-32_3	Human	118427	OLFM3	olfactomedin 3	Q96PB7
11144-10	11144-10_3	Human	245930	DEFB116	defensin, beta 116	Q30KQ4
11145-72	11145-72_3	Human	25758	KIAA1549L	chromosome 11 open reading frame 41	Q6ZVL6
11146-4	11146-4_3	Human	50945	TBX22	T-box 22	Q9Y458
11147-17	11147-17_3	Human	340205	TREML1	triggering receptor expressed on myeloid cells-like 1	Q86YW5
11149-3	11149-3_3	Human	7096	TLR1	toll-like receptor 1	Q15399
11152-46	11152-46_3	Human	26085	KLK13	kallikrein-related peptidase 13	Q9UKR3
11154-3	11154-3_3	Human	4779	NFE2L1	nuclear factor (erythroid-derived 2)-like 1	Q14494
11155-16	11155-16_3	Human	256076	COL6A5	collagen, type VI, alpha 5	A8TX70
11158-40	11158-40_3	Human	92558	BICDL1	coiled-coil domain containing 64	Q6ZP65
11160-56	11160-56_3	Human	79845	RNF122	ring finger protein 122	Q9H9V4
11161-5	11161-5_3	Human	23111	SPG20	spastic paraplegia 20 (Troyer syndrome)	Q8N0X7
11162-37	11162-37_3	Human	54586	EQTN	chromosome 9 open reading frame 11	Q9NQ60
11163-7	11163-7_3	Human	221303	FAM162B	family with sequence similarity 162, member B	Q5T6X4
11164-7	11164-7_3	Human	57451	TENM2	odz, odd Oz/ten-m homolog 2 (Drosophila)	Q9NT68
11167-6	11167-6_3	Human	8776	MTMR1	myotubularin related protein 1	Q13613
11168-3	11168-3_3	Human	84466	MEGF10	multiple EGF-like-domains 10	Q96KG7
11171-25	11171-25_3	Human	2316	FLNA	filamin A, alpha	P21333
11173-29	11173-29_3	Human	284021	MILR1	mast cell immunoglobulin-like receptor 1	Q7Z6M3
11174-8	11174-8_3	Human	221981	THSD7A	thrombospondin, type I, domain containing 7A	Q9UPZ6
11175-45	11175-45_3	Human	54947	LPCAT2	lysophosphatidylcholine acyltransferase 2	Q7L5N7
11177-16	11177-16_3	Human	3852	KRT5	keratin 5	P13647
11178-21	11178-21_3	Human	79987	SVEP1	sushi, von Willebrand factor type A, EGF and pentraxin domain containing 1	Q4LDE5
11179-7	11179-7_3	Human	83942	TSSK1B	testis-specific serine kinase 1B	Q9BXA7
11180-17	11180-17_3	Human	6599	SMARCC1	SWI/SNF related, matrix associated, actin dependent regulator of chromatin, subfamily c, member 1	Q92922
11185-145	11185-145_3	Human	2643	GCH1	GTP cyclohydrolase 1	P30793
11186-12	11186-12_3	Human	339456	TMEM52	transmembrane protein 52	Q8NDY8
11187-11	11187-11_3	Human	160364	CLEC12A	C-type lectin domain family 12, member A	Q5QGZ9
11190-129	11190-129_3	Human	10730	YME1L1	YME1-like 1 (S. cerevisiae)	Q96TA2
11192-168	11192-168_3	Human	64129	TINAGL1	tubulointerstitial nephritis antigen-like 1	Q9GZM7
11193-27	11193-27_3	Human	6927	HNF1A	HNF1 homeobox A	P20823
11194-6	11194-6_3	Human	27240	SIT1	signaling threshold regulating transmembrane adaptor 1	Q9Y3P8
11196-31	11196-31_3	Human	1293	COL6A3	collagen, type VI, alpha 3	P12111
11198-37	11198-37_3	Human	90993	CREB3L1	cAMP responsive element binding protein 3-like 1	Q96BA8
11201-19	11201-19_3	Human	80324	PUS1	pseudouridylate synthase 1	Q9Y606
11202-70	11202-70_3	Human	6910	TBX5	T-box 5	Q99593
11204-80	11204-80_3	Human	1525	CXADR	coxsackie virus and adenovirus receptor	P78310
11205-10	11205-10_3	Human	3695	ITGB7	integrin, beta 7	P26010
11207-3	11207-3_3	Human	4481	MSR1	macrophage scavenger receptor 1	P21757
11208-15	11208-15_3	Human	51172	NAGPA	N-acetylglucosamine-1-phosphodiester alpha-N-acetylglucosaminidase	Q9UK23
11211-7	11211-7_3	Human	6905	TBCE	tubulin folding cofactor E	Q15813
11212-7	11212-7_3	Human	81567	TXNDC5	thioredoxin domain containing 5 (endoplasmic reticulum)	Q8NBS9
11214-40	11214-40_3	Human	4189	DNAJB9	DnaJ (Hsp40) homolog, subfamily B, member 9	Q9UBS3
11215-6	11215-6_3	Human	1013	CDH15	cadherin 15, type 1, M-cadherin (myotubule)	P55291
11217-16	11217-16_3	Human	1487	CTBP1	C-terminal binding protein 1	Q13363
11218-84	11218-84_3	Human	7172	TPMT	thiopurine S-methyltransferase	P51580
11219-95	11219-95_3	Human	143282	FGFBP3	fibroblast growth factor binding protein 3	Q8TAT2
11220-53	11220-53_3	Human	414152	C10orf105	chromosome 10 open reading frame 105	Q8TEF2
11223-1	11223-1_3	Human	201799	TMEM154	transmembrane protein 154	Q6P9G4
11226-16	11226-16_3	Human	7337	UBE3A	ubiquitin protein ligase E3A	Q05086
11227-31	11227-31_3	Human	26608	TBL2	transducin (beta)-like 2	Q9Y4P3
11228-37	11228-37_3	Human	79608	RIC3	resistance to inhibitors of cholinesterase 3 homolog (C. elegans)	Q7Z5B4
11229-16	11229-16_3	Human	2081	ERN1	endoplasmic reticulum to nucleus signaling 1	O75460
11231-12	11231-12_3	Human	112812	FDX1L	ferredoxin 1-like	Q6P4F2
11237-49	11237-49_3	Human	5118	PCOLCE	procollagen C-endopeptidase enhancer	Q15113
11239-49	11239-49_3	Human	164656	TMPRSS6	transmembrane protease, serine 6	Q8IU80
11241-8	11241-8_3	Human	435	ASL	argininosuccinate lyase	P04424
11242-33	11242-33_3	Human	7051	TGM1	transglutaminase 1 (K polypeptide epidermal type I, protein-glutamine-gamma-glutamyltransferase)	P22735
11243-90	11243-90_3	Human	266977	ADGRF1	G protein-coupled receptor 110	Q5T601
11247-20	11247-20_3	Human	162417	NAGS	N-acetylglutamate synthase	Q8N159
11248-43	11248-43_3	Human	7390	UROS	uroporphyrinogen III synthase	P10746
11252-30	11252-30_3	Human	4034	LRCH4	leucine-rich repeats and calponin homology (CH) domain containing 4	O75427
11254-13	11254-13_3	Human	89932	PAPLN	papilin, proteoglycan-like sulfated glycoprotein	O95428
11257-1	11257-1_3	Human	5860	QDPR	quinoid dihydropteridine reductase	P09417
11258-41	11258-41_3	Human	8174	MADCAM1	mucosal vascular addressin cell adhesion molecule 1	Q13477
11260-47	11260-47_3	Human	140732	SUN5	Sad1 and UNC84 domain containing 5	Q8TC36
11262-39	11262-39_3	Human	80305	TRABD	TraB domain containing	Q9H4I3
11263-57	11263-57_3	Human	844	CASQ1	calsequestrin 1 (fast-twitch, skeletal muscle)	P31415
11264-33	11264-33_3	Human	7498	XDH	xanthine dehydrogenase	P47989
11265-8	11265-8_3	Human	216	ALDH1A1	aldehyde dehydrogenase 1 family, member A1	P00352
11266-8	11266-8_3	Human	6404	SELPLG	selectin P ligand	Q14242
11270-17	11270-17_3	Human	400916	CHCHD10	coiled-coil-helix-coiled-coil-helix domain containing 10	Q8WYQ3
11273-176	11273-176_3	Human	2953	GSTT2	glutathione S-transferase theta 2	P0CG30
11275-94	11275-94_3	Human	53353	LRP1B	low density lipoprotein receptor-related protein 1B	Q9NZR2
11277-23	11277-23_3	Human	22926	ATF6	activating transcription factor 6	P18850
11278-4	11278-4_3	Human	1302	COL11A2	collagen, type XI, alpha 2	P13942
11279-42	11279-42_3	Human	2550	GABBR1	gamma-aminobutyric acid (GABA) B receptor, 1	Q9UBS5
11280-6	11280-6_3	Human	2571	GAD1	glutamate decarboxylase 1 (brain, 67kDa)	Q99259
11281-6	11281-6_3	Human	2886	GRB7	growth factor receptor-bound protein 7	Q14451
11283-13	11283-13_3	Human	8816	DCAF5	DDB1 and CUL4 associated factor 5	Q96JK2
11284-24	11284-24_3	Human	3903	LAIR1	leukocyte-associated immunoglobulin-like receptor 1	Q6GTX8
11286-78	11286-78_3	Human	55829	VIMP	selenoprotein S	Q9BQE4
11287-14	11287-14_3	Human	1528	CYB5A	cytochrome b5 type A (microsomal)	P00167
11288-26	11288-26_3	Human	22978	NT5C2	5'-nucleotidase, cytosolic II	P49902
11289-31	11289-31_3	Human	1453	CSNK1D	casein kinase 1, delta	P48730
11293-14	11293-14_3	Human	57633	LRRN1	leucine rich repeat neuronal 1	Q6UXK5
11297-54	11297-54_3	Human	4853	NOTCH2	notch 2	Q04721
11300-32	11300-32_3	Human	6272	SORT1	sortilin 1	Q99523
11302-237	11302-237_3	Human	7143	TNR	tenascin R (restrictin, janusin)	Q92752
11303-7	11303-7_3	Human	25939	SAMHD1	SAM domain and HD domain 1	Q9Y3Z3
11307-33	11307-33_3	Human	11059	WWP1	WW domain containing E3 ubiquitin protein ligase 1	Q9H0M0
11308-8	11308-8_3	Human	148327	CREB3L4	cAMP responsive element binding protein 3-like 4	Q8TEY5
11311-79	11311-79_3	Human	5896	RAG1	recombination activating gene 1	P15918
11312-40	11312-40_3	Human	5395	PMS2	PMS2 postmeiotic segregation increased 2 (S. cerevisiae)	P54278
11313-100	11313-100_3	Human	5092	PCBD1	pterin-4 alpha-carbinolamine dehydratase/dimerization cofactor of hepatocyte nuclear factor 1 alpha	P61457
11315-148	11315-148_3	Human	8493	PPM1D	protein phosphatase, Mg2+/Mn2+ dependent, 1D	O15297
11319-106	11319-106_3	Human	4361	MRE11A	MRE11 meiotic recombination 11 homolog A (S. cerevisiae)	P49959
11320-29	11320-29_3	Human	55743	CHFR	checkpoint with forkhead and ring finger domains	Q96EP1
11324-3	11324-3_3	Human	137902	PXDNL	peroxidasin homolog (Drosophila)-like	A1KZ92
11325-8	11325-8_3	Human	7832	BTG2	BTG family, member 2	P78543
11327-56	11327-56_3	Human	1196	CLK2	CDC-like kinase 2	P49760
11328-9	11328-9_3	Human	79650	USB1	chromosome 16 open reading frame 57	Q9BQ65
11330-15	11330-15_3	Human	1460	CSNK2B	casein kinase 2, beta polypeptide	P67870
11333-82	11333-82_3	Human	9938	ARHGAP25	Rho GTPase activating protein 25	P42331
11334-7	11334-7_3	Human	11025	LILRB3	leukocyte immunoglobulin-like receptor, subfamily B (with TM and ITIM domains), member 3	O75022
11336-9	11336-9_3	Human	2188	FANCF	Fanconi anemia, complementation group F	Q9NPI8
11338-49	11338-49_3	Human	640	BLK	B lymphoid tyrosine kinase	P51451
11342-59	11342-59_3	Human	84898	PLXDC2	plexin domain containing 2	Q6UX71
11347-9	11347-9_3	Human	6888	TALDO1	transaldolase 1	P37837
11348-132	11348-132_3	Human	8974	P4HA2	prolyl 4-hydroxylase, alpha polypeptide II	O15460
11350-30	11350-30_3	Human	10273	STUB1	STIP1 homology and U-box containing protein 1, E3 ubiquitin protein ligase	Q9UNE7
11351-233	11351-233_3	Human	79840	NHEJ1	nonhomologous end-joining factor 1	Q9H9Q4
11352-42	11352-42_3	Human	7273	TTN	titin	Q8WZ42
11354-21	11354-21_3	Human	23236	PLCB1	phospholipase C, beta 1 (phosphoinositide-specific)	Q9NQ66
11355-10	11355-10_3	Human	56648	EIF5A2	eukaryotic translation initiation factor 5A2	Q9GZV4
11356-19	11356-19_3	Human	8220	DGCR14	DiGeorge syndrome critical region gene 14	Q96DF8
11358-15	11358-15_3	Human	2887	GRB10	growth factor receptor-bound protein 10	Q13322
11360-39	11360-39_3	Human	6240	RRM1	ribonucleotide reductase M1	P23921
11361-73	11361-73_3	Human	1890	TYMP	thymidine phosphorylase	P19971
11363-58	11363-58_3	Human	361	AQP4	aquaporin 4	P55087
11364-18	11364-18_3	Human	55669	MFN1	mitofusin 1	Q8IWA4
11365-17	11365-17_3	Human	26011	TENM4	odz, odd Oz/ten-m homolog 4 (Drosophila)	Q6N022
11368-32	11368-32_3	Human	204	AK2	adenylate kinase 2	P54819
11369-23	11369-23_3	Human	128	ADH5	alcohol dehydrogenase 5 (class III), chi polypeptide	P11766
11370-20	11370-20_3	Human	56623	INPP5E	inositol polyphosphate-5-phosphatase, 72 kDa	Q9NRR6
11371-1	11371-1_3	Human	83550	GPR101	G protein-coupled receptor 101	Q96P66
11372-2	11372-2_3	Human	7566	ZNF18	zinc finger protein 18	P17022
11375-49	11375-49_3	Human	668	FOXL2	forkhead box L2	P58012
11377-19	11377-19_3	Human	131	ADH7	alcohol dehydrogenase 7 (class IV), mu or sigma polypeptide	P40394
11378-37	11378-37_3	Human	6850	SYK	spleen tyrosine kinase	P43405
11380-84	11380-84_3	Human	221662	RBM24	RNA binding motif protein 24	Q9BX46
11381-56	11381-56_3	Human	5631	PRPS1	phosphoribosyl pyrophosphate synthetase 1	P60891
11382-5	11382-5_3	Human	644	BLVRA	biliverdin reductase A	P53004
11383-41	11383-41_3	Human	3855	KRT7	keratin 7	P08729
11387-3	11387-3_3	Human	1388	ATF6B	activating transcription factor 6 beta	Q99941
11388-75	11388-75_3	Human	10406	WFDC2	WAP four-disulfide core domain 2	Q14508
11390-24	11390-24_3	Human	767	CA8	carbonic anhydrase VIII	P35219
11391-69	11391-69_3	Human	4598	MVK	mevalonate kinase	Q03426
11395-5	11395-5_3	Human	2185	PTK2B	PTK2B protein tyrosine kinase 2 beta	Q14289
11396-39	11396-39_3	Human	27019	DNAI1	dynein, axonemal, intermediate chain 1	Q9UI46
11401-181	11401-181_3	Human	81847	RNF146	ring finger protein 146	Q9NTX7
11402-17	11402-17_3	Human	58508	KMT2C	myeloid/lymphoid or mixed-lineage leukemia 3	Q8NEZ4
11405-150	11405-150_3	Human	64170	CARD9	caspase recruitment domain family, member 9	Q9H257
11406-82	11406-82_3	Human	27034	ACAD8	acyl-CoA dehydrogenase family, member 8	Q9UKU7
11407-57	11407-57_3	Human	57048	PLSCR3	phospholipid scramblase 3	Q9NRY6
11416-23	11416-23_3	Human	26235	FBXL4	F-box and leucine-rich repeat protein 4	Q9UKA2
11421-10	11421-10_3	Human	30844	EHD4	EH-domain containing 4	Q9H223
11422-2	11422-2_3	Human	1747	DLX3	distal-less homeobox 3	O60479
11424-4	11424-4_3	Human	2184	FAH	fumarylacetoacetate hydrolase (fumarylacetoacetase)	P16930
11425-31	11425-31_3	Human	80230	RUFY1	RUN and FYVE domain containing 1	Q96T51
11428-31	11428-31_3	Human	9124	PDLIM1	PDZ and LIM domain 1	O00151
11429-80	11429-80_3	Human	3183	HNRNPC	heterogeneous nuclear ribonucleoprotein C (C1/C2)	P07910
11430-49	11430-49_3	Human	1840	DTX1	deltex homolog 1 (Drosophila)	Q86Y01
11431-235	11431-235_3	Human	5965	RECQL	RecQ protein-like (DNA helicase Q1-like)	P46063
11432-11	11432-11_3	Human	10084	PQBP1	polyglutamine binding protein 1	O60828
11433-11	11433-11_3	Human	79867	TCTN2	tectonic family member 2	Q96GX1
11436-6	11436-6_3	Human	9118	INA	internexin neuronal intermediate filament protein, alpha	Q16352
11438-6	11438-6_3	Human	3300	DNAJB2	DnaJ (Hsp40) homolog, subfamily B, member 2	P25686
11439-88	11439-88_3	Human	85415	RHPN2	rhophilin, Rho GTPase binding protein 2	Q8IUC4
11440-58	11440-58_3	Human	9021	SOCS3	suppressor of cytokine signaling 3	O14543
11441-11	11441-11_3	Human	5836	PYGL	phosphorylase, glycogen, liver	P06737
11442-1	11442-1_3	Human	92737	DNER	delta/notch-like EGF repeat containing	Q8NFT8
11444-49	11444-49_3	Human	10621	POLR3F	polymerase (RNA) III (DNA directed) polypeptide F, 39 kDa	Q9H1D9
11448-34	11448-34_3	Human	2584	GALK1	galactokinase 1	P51570
11449-22	11449-22_3	Human	829	CAPZA1	capping protein (actin filament) muscle Z-line, alpha 1	P52907
11454-87	11454-87_3	Human	8666	EIF3G	eukaryotic translation initiation factor 3, subunit G	O75821
11456-2	11456-2_3	Human	139422	MAGEB10	melanoma antigen family B, 10	Q96LZ2
11457-53	11457-53_3	Human	2582	GALE	UDP-galactose-4-epimerase	Q14376
11458-30	11458-30_3	Human	5093	PCBP1	poly(rC) binding protein 1	Q15365
11459-81	11459-81_3	Human	8178	ELL	elongation factor RNA polymerase II	P55199
11462-8	11462-8_3	Human	23543	RBFOX2	RNA binding protein, fox-1 homolog (C. elegans) 2	O43251
11464-9	11464-9_3	Human	5971	RELB	v-rel reticuloendotheliosis viral oncogene homolog B	Q01201
11465-4	11465-4_3	Human	64582	GPR135	G protein-coupled receptor 135	Q8IZ08
11468-15	11468-15_3	Human	9904	RBM19	RNA binding motif protein 19	Q9Y4C8
11476-43	11476-43_3	Human	27183	VPS4A	vacuolar protein sorting 4 homolog A (S. cerevisiae)	Q9UN37
11480-1	11480-1_3	Human	218	ALDH3A1	aldehyde dehydrogenase 3 family, member A1	P30838
11481-25	11481-25_3	Human	84868	HAVCR2	hepatitis A virus cellular receptor 2	Q8TDQ0
11486-26	11486-26_3	Human	7727	ZNF174	zinc finger protein 174	Q15697
11490-42	11490-42_3	Human	8266	UBL4A	ubiquitin-like 4A	P11441
11493-169	11493-169_3	Human	140735	DYNLL2	dynein, light chain, LC8-type 2	Q96FJ2
11494-4	11494-4_3	Human	22936	ELL2	elongation factor, RNA polymerase II, 2	O00472
11510-31	11510-31_3	Human	8542	APOL1	apolipoprotein L, 1	O14791
11513-92	11513-92_3	Human	952	CD38	CD38 molecule	P28907
11514-196	11514-196_3	Human	966	CD59	CD59 molecule, complement regulatory protein	P13987
11516-7	11516-7_3	Human	2168	FABP1	fatty acid binding protein 1, liver	P07148
11530-37	11530-37_3	Human	3145	HMBS	hydroxymethylbilane synthase	P08397
11531-24	11531-24_3	Human	64115	C10orf54	chromosome 10 open reading frame 54	Q9H7M9
11534-6	11534-6_3	Human	345193	LRIT3	leucine-rich repeat, immunoglobulin-like and transmembrane domains 3	Q3SXY7
11536-9	11536-9_3	Human	114803	MYSM1	Myb-like, SWIRM and MPN domains 1	Q5VVJ2
11537-12	11537-12_3	Human	7036	TFR2	transferrin receptor 2	Q9UP52
11538-216	11538-216_3	Human	23417	MLYCD	malonyl-CoA decarboxylase	O95822
11539-4	11539-4_3	Human	9551	ATP5J2	ATP synthase, H+ transporting, mitochondrial Fo complex, subunit F2	P56134
11540-37	11540-37_3	Human	2309	FOXO3	forkhead box O3	O43524
11542-11	11542-11_3	Human	29058	TMEM230	chromosome 20 open reading frame 30	Q96A57
11543-84	11543-84_3	Human	51474	LIMA1	LIM domain and actin binding 1	Q9UHB6
11544-39	11544-39_3	Human	23469	PHF3	PHD finger protein 3	Q92576
11546-7	11546-7_3	Human	114757	CYGB	cytoglobin	Q8WWM9
11547-84	11547-84_3	Human	4593	MUSK	muscle, skeletal, receptor tyrosine kinase	O15146
11548-84	11548-84_3	Human	993	CDC25A	cell division cycle 25 homolog A (S. pombe)	P30304
11549-6	11549-6_3	Human	3670	ISL1	ISL LIM homeobox 1	P61371
11551-16	11551-16_3	Human	10362	HMG20B	high mobility group 20B	Q9P0W2
11556-19	11556-19_3	Human	55738	ARFGAP1	ADP-ribosylation factor GTPase activating protein 1	Q8N6T3
11557-3	11557-3_3	Human	57154	SMURF1	SMAD specific E3 ubiquitin protein ligase 1	Q9HCE7
11560-76	11560-76_3	Human	4776	NFATC4	nuclear factor of activated T-cells, cytoplasmic, calcineurin-dependent 4	Q14934
11562-9	11562-9_3	Human	5427	POLE2	polymerase (DNA directed), epsilon 2 (p59 subunit)	P56282
11563-51	11563-51_3	Human	94121	SYTL4	synaptotagmin-like 4	Q96C24
11565-58	11565-58_3	Human	7571	ZNF23	zinc finger protein 23 (KOX 16)	P17027
11566-48	11566-48_3	Human	140807	KRT72	keratin 72	Q14CN4
11567-23	11567-23_3	Human	7556	ZNF10	zinc finger protein 10	P21506
11568-2	11568-2_3	Human	2281	FKBP1B	FK506 binding protein 1B, 12.6 kDa	P68106
11570-94	11570-94_3	Human	55973	BCAP29	B-cell receptor-associated protein 29	Q9UHQ4
11571-75	11571-75_3	Human	3823	KLRC3	killer cell lectin-like receptor subfamily C, member 3	Q07444
11572-4	11572-4_3	Human	1785	DNM2	dynamin 2	P50570
11573-3	11573-3_3	Human	6431	SRSF6	serine/arginine-rich splicing factor 6	Q13247
11582-63	11582-63_3	Human	10294	DNAJA2	DnaJ (Hsp40) homolog, subfamily A, member 2	O60884
11587-5	11587-5_3	Human	23269	MGA	MAX gene associated	Q8IWI9
11590-5	11590-5_3	Human	55147	RBM23	RNA binding motif protein 23	Q86U06
11591-43	11591-43_3	Human	9055	PRC1	protein regulator of cytokinesis 1	O43663
11592-1	11592-1_3	Human	1994	ELAVL1	ELAV (embryonic lethal, abnormal vision, Drosophila)-like 1 (Hu antigen R)	Q15717
11593-21	11593-21_3	Human	4283	CXCL9	chemokine (C-X-C motif) ligand 9	Q07325
11596-47	11596-47_3	Human	7626	ZNF75D	zinc finger protein 75D	P51815
11601-26	11601-26_3	Human	1659	DHX8	DEAH (Asp-Glu-Ala-His) box polypeptide 8	Q14562
11606-22	11606-22_3	Human	10049	DNAJB6	DnaJ (Hsp40) homolog, subfamily B, member 6	O75190
11607-15	11607-15_3	Human	23774	BRD1	bromodomain containing 1	O95696
11608-5	11608-5_3	Human	81631	MAP1LC3B	microtubule-associated protein 1 light chain 3 beta	Q9GZQ8
11614-29	11614-29_3	Human	2079	ERH	enhancer of rudimentary homolog (Drosophila)	P84090
11615-16	11615-16_3	Human	27071	DAPP1	dual adaptor of phosphotyrosine and 3-phosphoinositides	Q9UN19
11616-9	11616-9_3	Human	3297	HSF1	heat shock transcription factor 1	Q00613
11617-1	11617-1_3	Human	3683	ITGAL	integrin, alpha L (antigen CD11A (p180), lymphocyte function-associated antigen 1	P20701
11618-83	11618-83_3	Human	4602	MYB	v-myb myeloblastosis viral oncogene homolog (avian)	P10242
11626-7	11626-7_3	Human	7335	UBE2V1	ubiquitin-conjugating enzyme E2 variant 1	Q13404
11633-89	11633-89_3	Human	10598	AHSA1	AHA1, activator of heat shock 90kDa protein ATPase homolog 1 (yeast)	O95433
11634-32	11634-32_3	Human	6001	RGS10	regulator of G-protein signaling 10	O43665
11636-33	11636-33_3	Human	8407	TAGLN2	transgelin 2	P37802
11638-42	11638-42_3	Human	8707	B3GALT2	UDP-Gal:betaGlcNAc beta 1,3-galactosyltransferase, polypeptide 2	O43825
11643-73	11643-73_3	Human	151636	DTX3L	deltex 3-like (Drosophila)	Q8TDB6
11645-9	11645-9_3	Human	5033	P4HA1	prolyl 4-hydroxylase, alpha polypeptide I	P13674
11646-4	11646-4_3	Human	83539	CHST9	carbohydrate (N-acetylgalactosamine 4-0) sulfotransferase 9	Q7L1S5
11647-6	11647-6_3	Human	11211	FZD10	frizzled family receptor 10	Q9ULW2
11649-3	11649-3_3	Human	60682	SMAP1	small ArfGAP 1	Q8IYB5
11653-69	11653-69_3	Human	6536	SLC6A9	solute carrier family 6 (neurotransmitter transporter, glycine), member 9	P48067
11654-77	11654-77_3	Human	140767	NRSN1	neurensin 1	Q8IZ57
11656-110	11656-110_3	Human	51466	EVL	Enah/Vasp-like	Q9UI08
11657-86	11657-86_3	Human	30837	SOCS7	suppressor of cytokine signaling 7	O14512
11659-31	11659-31_3	Human	9685	CLINT1	clathrin interactor 1	Q14677
11661-11	11661-11_3	Human	22861	NLRP1	NLR family, pyrin domain containing 1	Q9C000
11664-32	11664-32_3	Human	84364	ARFGAP2	ADP-ribosylation factor GTPase activating protein 2	Q8N6H7
11666-72	11666-72_3	Human	85397	RGS8	regulator of G-protein signaling 8	P57771
11667-29	11667-29_3	Human	23371	TNS2	tensin like C1 domain containing phosphatase (tensin 2)	Q63HR2
11669-39	11669-39_3	Human	81796	SLCO5A1	solute carrier organic anion transporter family, member 5A1	Q9H2Y9
11671-19	11671-19_3	Human	7862	BRPF1	bromodomain and PHD finger containing, 1	P55201
11672-17	11672-17_3	Human	55614	KIF16B	kinesin family member 16B	Q96L93
11677-17	11677-17_3	Human	79683	ZDHHC14	zinc finger, DHHC-type containing 14	Q8IZN3
11678-105	11678-105_3	Human	57369	GJD2	gap junction protein, delta 2, 36kDa	Q9UKL4
11681-8	11681-8_3	Human	3267	AGFG1	ArfGAP with FG repeats 1	P52594
11682-7	11682-7_3	Human	10628	TXNIP	thioredoxin interacting protein	Q9H3M7
11683-19	11683-19_3	Human	23163	GGA3	golgi-associated, gamma adaptin ear containing, ARF binding protein 3	Q9NZ52
11690-47	11690-47_3	Human	51434	ANAPC7	anaphase promoting complex subunit 7	Q9UJX3
11692-21	11692-21_3	Human	399694	SHC4	SHC (Src homology 2 domain containing) family, member 4	Q6S5L8
11696-7	11696-7_3	Human	1382	CRABP2	cellular retinoic acid binding protein 2	P29373
11699-16	11699-16_3	Human	8073	PTP4A2	protein tyrosine phosphatase type IVA, member 2	Q12974
11708-2	11708-2_3	Human	3933	LCN1	lipocalin 1 (tear prealbumin)	P31025
11709-29	11709-29_3	Human	1375	CPT1B	carnitine palmitoyltransferase 1B (muscle)	Q92523
11715-1	11715-1_3	Human	5451	POU2F1	POU class 2 homeobox 1	P14859
11716-28	11716-28_3	Human	340745	LRIT2	leucine-rich repeat, immunoglobulin-like and transmembrane domains 2	A6NDA9
11816-84	11816-84_3	Human	3717	JAK2	Janus kinase 2	O60674
11825-27	11825-27_3	Human	10891	PPARGC1A	peroxisome proliferator-activated receptor gamma, coactivator 1 alpha	Q9UBK2
11827-7	11827-7_3	Human	6097	RORC	RAR-related orphan receptor C	P51449
11837-7	11837-7_3	Human	8784	TNFRSF18	tumor necrosis factor receptor superfamily, member 18	Q9Y5U5
11838-130	11838-130_3	Human	9780	PIEZO1	family with sequence similarity 38, member A	Q92508
11872-9	11872-9_3	Human	56104	PCDHGB1	protocadherin gamma subfamily B, 1	Q9Y5G3
11910-27	11910-27_3	Human	1748	DLX4	distal-less homeobox 4	Q92988
11911-13	11911-13_3	Human	94030	LRRC4B	leucine rich repeat containing 4B	Q9NT99
11926-23	11926-23_3	Human	79719	AAGAB	alpha- and gamma-adaptin binding protein	Q6PD74
11934-9	11934-9_3	Human	65123	INTS3	integrator complex subunit 3	Q68E01
11952-1	11952-1_3	Human	9543	IGDCC3	immunoglobulin superfamily, DCC subclass, member 3	Q8IVU1
11955-1	11955-1_3	Human	392	ARHGAP1	Rho GTPase activating protein 1	Q07960
11967-23	11967-23_3	Human	1381	CRABP1	cellular retinoic acid binding protein 1	P29762
11969-5	11969-5_3	Human	6273	S100A2	S100 calcium binding protein A2	P29034
11988-24	11988-24_3	Human	5794	PTPRH	protein tyrosine phosphatase, receptor type, H	Q9HD43
11989-35	11989-35_3	Human	23065	EMC1	KIAA0090	Q8N766
12001-7	12001-7_3	Human	7082	TJP1	tight junction protein 1 (zona occludens 1)	Q07157
12008-3	12008-3_3	Human	924	CD7	CD7 molecule	P09564
12014-19	12014-19_3	Human	5805	PTS	6-pyruvoyltetrahydropterin synthase	Q03393
12016-60	12016-60_3	Human	867	CBL	Cas-Br-M (murine) ecotropic retroviral transforming sequence	P22681
12018-84	12018-84_3	Human	27010	TPK1	thiamin pyrophosphokinase 1	Q9H3S4
12020-39	12020-39_3	Human	669	BPGM	2,3-bisphosphoglycerate mutase	P07738
12022-12	12022-12_3	Human	4089	SMAD4	SMAD family member 4	Q13485
12030-82	12030-82_3	Human	1674	DES	desmin	P17661
12033-3	12033-3_3	Human	699	BUB1	budding uninhibited by benzimidazoles 1 homolog (yeast)	O43683
12034-28	12034-28_3	Human	10487	CAP1	CAP, adenylate cyclase-associated protein 1 (yeast)	Q01518
12041-33	12041-33_3	Human	3305	HSPA1L	heat shock 70kDa protein 1-like	P34931
12046-51	12046-51_3	Human	23435	TARDBP	TAR DNA binding protein	Q13148
12329-21	12329-21_3	Human	6195	RPS6KA1	ribosomal protein S6 kinase, 90kDa, polypeptide 1	Q15418
12332-7	12332-7_3	Human	29904	EEF2K	eukaryotic elongation factor-2 kinase	O00418
12333-87	12333-87_3	Human	22934	RPIA	ribose 5-phosphate isomerase A	P49247
12334-25	12334-25_3	Human	6470	SHMT1	serine hydroxymethyltransferase 1 (soluble)	P34896
12338-27	12338-27_3	Human	133584	EGFLAM	EGF-like, fibronectin type III and laminin G domains	Q63HQ2
12340-17	12340-17_3	Human	16	AARS	alanyl-tRNA synthetase	P49588
12341-8	12341-8_3	Human	1848	DUSP6	dual specificity phosphatase 6	Q16828
12343-14	12343-14_3	Human	23527	ACAP2	ArfGAP with coiled-coil, ankyrin repeat and PH domains 2	Q15057
12345-4	12345-4_3	Human	10393	ANAPC10	anaphase promoting complex subunit 10	Q9UM13
12347-29	12347-29_3	Human	83605	CCM2	cerebral cavernous malformation 2	Q9BSQ5
12348-46	12348-46_3	Human	54938	SARS2	seryl-tRNA synthetase 2, mitochondrial	Q9NP81
12350-86	12350-86_3	Human	2114	ETS2	v-ets erythroblastosis virus E26 oncogene homolog 2 (avian)	P15036
12352-70	12352-70_3	Human	57561	ARRDC3	arrestin domain containing 3	Q96B67
12355-223	12355-223_3	Human	92399	MRRF	mitochondrial ribosome recycling factor	Q96E11
12356-65	12356-65_3	Human	6717	SRI	sorcin	P30626
12357-41	12357-41_3	Human	9342	SNAP29	synaptosomal-associated protein, 29kDa	O95721
12358-6	12358-6_3	Human	3476	IGBP1	immunoglobulin (CD79A) binding protein 1	P78318
12361-102	12361-102_3	Human	22800	RRAS2	related RAS viral (r-ras) oncogene homolog 2	P62070
12363-70	12363-70_3	Human	28951	TRIB2	tribbles homolog 2 (Drosophila)	Q92519
12365-108	12365-108_3	Human	8607	RUVBL1	RuvB-like 1 (E. coli)	Q9Y265
12366-16	12366-16_3	Human	1421	CRYGD	crystallin, gamma D	P07320
12367-52	12367-52_3	Human	55219	TMEM57	transmembrane protein 57	Q8N5G2
12368-18	12368-18_3	Human	8850	KAT2B	K(lysine) acetyltransferase 2B	Q92831
12370-30	12370-30_3	Human	319	APOF	apolipoprotein F	Q13790
12373-73	12373-73_3	Human	6434	TRA2B	transformer 2 beta homolog (Drosophila)	P62995
12374-8	12374-8_3	Human	5050	PAFAH1B3	platelet-activating factor acetylhydrolase 1b, catalytic subunit 3 (29kDa)	Q15102
12376-85	12376-85_3	Human	1032	CDKN2D	cyclin-dependent kinase inhibitor 2D (p19, inhibits CDK4)	P55273
12378-71	12378-71_3	Human	6892	TAPBP	TAP binding protein (tapasin)	O15533
12381-26	12381-26_3	Human	873	CBR1	carbonyl reductase 1	P16152
12382-2	12382-2_3	Human	23586	DDX58	DEAD (Asp-Glu-Ala-Asp) box polypeptide 58	O95786
12384-92	12384-92_3	Human	64708	COPS7B	COP9 constitutive photomorphogenic homolog subunit 7B (Arabidopsis)	Q9H9Q2
12385-4	12385-4_3	Human	825	CAPN3	calpain 3, (p94)	P20807
12386-11	12386-11_3	Human	6051	RNPEP	arginyl aminopeptidase (aminopeptidase B)	Q9H4A4
12387-7	12387-7_3	Human	8572	PDLIM4	PDZ and LIM domain 4	P50479
12389-4	12389-4_3	Human	23594	ORC6	origin recognition complex, subunit 6	Q9Y5N6
12391-27	12391-27_3	Human	79955	PDZD7	PDZ domain containing 7	Q9H5P4
12392-30	12392-30_3	Human	400	ARL1	ADP-ribosylation factor-like 1	P40616
12394-53	12394-53_3	Human	283897	C16orf54	chromosome 16 open reading frame 54	Q6UWD8
12395-86	12395-86_3	Human	55157	DARS2	aspartyl-tRNA synthetase 2, mitochondrial	Q6PI48
12396-19	12396-19_3	Human	26275	HIBCH	3-hydroxyisobutyryl-CoA hydrolase	Q6NVY1
12398-15	12398-15_3	Human	5078	PAX4	paired box 4	O43316
12399-194	12399-194_3	Human	152137	CCDC50	coiled-coil domain containing 50	Q8IVM0
12400-25	12400-25_3	Human	29089	UBE2T	ubiquitin-conjugating enzyme E2T (putative)	Q9NPD8
12401-3	12401-3_3	Human	57559	STAMBPL1	STAM binding protein-like 1	Q96FJ0
12403-30	12403-30_3	Human	116442	RAB39B	RAB39B, member RAS oncogene family	Q96DA2
12406-119	12406-119_3	Human	9077	DIRAS3	DIRAS family, GTP-binding RAS-like 3	O95661
12408-333	12408-333_3	Human	57403	RAB22A	RAB22A, member RAS oncogene family	Q9UL26
12409-90	12409-90_3	Human	338382	RAB7B	RAB7B, member RAS oncogene family	Q96AH8
12411-60	12411-60_3	Human	4149	MAX	MYC associated factor X	P61244
12415-122	12415-122_3	Human	8721	EDF1	endothelial differentiation-related factor 1	O60869
12417-46	12417-46_3	Human	51002	TPRKB	TP53RK binding protein	Q9Y3C4
12420-10	12420-10_3	Human	23171	GPD1L	glycerol-3-phosphate dehydrogenase 1-like	Q8N335
12422-143	12422-143_3	Human	247	ALOX15B	arachidonate 15-lipoxygenase, type B	O15296
12423-38	12423-38_3	Human	29974	A1CF	APOBEC1 complementation factor	Q9NQ94
12424-107	12424-107_3	Human	29087	THYN1	thymocyte nuclear protein 1	Q9P016
12425-104	12425-104_3	Human	382	ARF6	ADP-ribosylation factor 6	P62330
12426-19	12426-19_3	Human	55233	MOB1A	MOB1, Mps One Binder kinase activator-like 1B (yeast)	Q9H8S9
12427-8	12427-8_3	Human	994	CDC25B	cell division cycle 25 homolog B (S. pombe)	P30305
12428-2	12428-2_3	Human	127018	LYPLAL1	lysophospholipase-like 1	Q5VWZ2
12430-78	12430-78_3	Human	10605	PAIP1	poly(A) binding protein interacting protein 1	Q9H074
12431-13	12431-13_3	Human	53918	PELO	pelota homolog (Drosophila)	Q9BRX2
12432-23	12432-23_3	Human	27101	CACYBP	calcyclin binding protein	Q9HB71
12433-8	12433-8_3	Human	115761	ARL11	ADP-ribosylation factor-like 11	Q969Q4
12434-25	12434-25_3	Human	9798	IST1	increased sodium tolerance 1 homolog (yeast)	P53990
12436-84	12436-84_3	Human	9446	GSTO1	glutathione S-transferase omega 1	P78417
12437-18	12437-18_3	Human	25989	ULK3	unc-51-like kinase 3 (C. elegans)	Q6PHR2
12438-127	12438-127_3	Human	4350	MPG	N-methylpurine-DNA glycosylase	P29372
12439-67	12439-67_3	Human	10379	IRF9	interferon regulatory factor 9	Q00978
12442-4	12442-4_3	Human	29984	RHOD	ras homolog gene family, member D	O00212
12444-39	12444-39_3	Human	2494	NR5A2	nuclear receptor subfamily 5, group A, member 2	O00482
12445-50	12445-50_3	Human	84079	ANKRD27	ankyrin repeat domain 27 (VPS9 domain)	Q96NW4
12449-16	12449-16_3	Human	10465	PPIH	peptidylprolyl isomerase H (cyclophilin H)	O43447
12450-42	12450-42_3	Human	10654	PMVK	phosphomevalonate kinase	Q15126
12451-62	12451-62_3	Human	571	BACH1	BTB and CNC homology 1, basic leucine zipper transcription factor 1	O14867
12452-32	12452-32_3	Human	84787	KMT5C	suppressor of variegation 4-20 homolog 2 (Drosophila)	Q86Y97
12453-161	12453-161_3	Human	10482	NXF1	nuclear RNA export factor 1	Q9UBU9
12454-105	12454-105_3	Human	28989	NTMT1	methyltransferase like 11A	Q9BV86
12455-48	12455-48_3	Human	55892	MYNN	myoneurin	Q9NPC7
12456-5	12456-5_3	Human	5209	PFKFB3	6-phosphofructo-2-kinase/fructose-2,6-biphosphatase 3	Q16875
12457-10	12457-10_3	Human	55256	ADI1	acireductone dioxygenase 1	Q9BV57
12458-79	12458-79_3	Human	11261	CHP1	calcium binding protein P22	Q99653
12459-13	12459-13_3	Human	59338	PLEKHA1	pleckstrin homology domain containing, family A (phosphoinositide binding specific) member 1	Q9HB21
12460-18	12460-18_3	Human	5688	PSMA7	proteasome (prosome, macropain) subunit, alpha type, 7	O14818
12461-8	12461-8_3	Human	23408	SIRT5	sirtuin 5	Q9NXA8
12462-20	12462-20_3	Human	6419	SETMAR	SET domain and mariner transposase fusion gene	Q53H47
12463-7	12463-7_3	Human	90293	KLHL13	kelch-like 13 (Drosophila)	Q9P2N7
12466-7	12466-7_3	Human	3178	HNRNPA1	heterogeneous nuclear ribonucleoprotein A1	P09651
12469-19	12469-19_3	Human	22919	MAPRE1	microtubule-associated protein, RP/EB family, member 1	Q15691
12471-47	12471-47_3	Human	6780	STAU1	staufen, RNA binding protein, homolog 1 (Drosophila)	O95793
12473-48	12473-48_3	Human	54442	KCTD5	potassium channel tetramerisation domain containing 5	Q9NXV2
12475-48	12475-48_3	Human	53405	CLIC5	chloride intracellular channel 5	Q9NZA1
12476-50	12476-50_3	Human	57103	TIGAR	chromosome 12 open reading frame 5	Q9NQ88
12477-42	12477-42_3	Human	7247	TSN	translin	Q15631
12478-15	12478-15_3	Human	6156	RPL30	ribosomal protein L30	P62888
12479-50	12479-50_3	Human	5575	PRKAR1B	protein kinase, cAMP-dependent, regulatory, type I, beta	P31321
12480-9	12480-9_3	Human	55593	OTUD5	OTU domain containing 5	Q96G74
12482-5	12482-5_3	Human	2186	BPTF	bromodomain PHD finger transcription factor	Q12830
12483-62	12483-62_3	Human	6096	RORB	RAR-related orphan receptor B	Q92753
12484-67	12484-67_3	Human	23760	PITPNB	phosphatidylinositol transfer protein, beta	P48739
12486-8	12486-8_3	Human	51022	GLRX2	glutaredoxin 2	Q9NS18
12488-9	12488-9_3	Human	28985	MCTS1	malignant T cell amplified sequence 1	Q9ULC4
12490-92	12490-92_3	Human	8649	LAMTOR3	late endosomal/lysosomal adaptor, MAPK and MTOR activator 3	Q9UHA4
12493-42	12493-42_3	Human	78990	OTUB2	OTU domain, ubiquitin aldehyde binding 2	Q96DC9
12494-99	12494-99_3	Human	11345	GABARAPL2	GABA(A) receptor-associated protein-like 2	P60520
12497-29	12497-29_3	Human	84309	NUDT16L1	nudix (nucleoside diphosphate linked moiety X)-type motif 16-like 1	Q9BRJ7
12498-12	12498-12_3	Human	30851	TAX1BP3	Tax1 (human T-cell leukemia virus type I) binding protein 3	O14907
12499-108	12499-108_3	Human	6456	SH3GL2	SH3-domain GRB2-like 2	Q99962
12500-88	12500-88_3	Human	10054	UBA2	ubiquitin-like modifier activating enzyme 2	Q9UBT2
12501-10	12501-10_3	Human	6902	TBCA	tubulin folding cofactor A	O75347
12503-5	12503-5_3	Human	8111	GPR68	G protein-coupled receptor 68	Q15743
12504-26	12504-26_3	Human	25802	LMOD1	leiomodin 1 (smooth muscle)	P29536
12507-16	12507-16_3	Human	80271	ITPKC	inositol-trisphosphate 3-kinase C	Q96DU7
12508-9	12508-9_3	Human	51652	CHMP3	vacuolar protein sorting 24 homolog (S. cerevisiae)	Q9Y3E7
12509-115	12509-115_3	Human	150684	COMMD1	copper metabolism (Murr1) domain containing 1	Q8N668
12510-3	12510-3_3	Human	26228	STAP1	signal transducing adaptor family member 1	Q9ULZ2
12511-83	12511-83_3	Human	84102	SLC41A2	solute carrier family 41, member 2	Q96JW4
12513-8	12513-8_3	Human	51228	GLTP	glycolipid transfer protein	Q9NZD2
12514-16	12514-16_3	Human	4234	METTL1	methyltransferase like 1	Q9UBP6
12515-45	12515-45_3	Human	7371	UCK2	uridine-cytidine kinase 2	Q9BZX2
12516-13	12516-13_3	Human	7004	TEAD4	TEA domain family member 4	Q15561
12517-52	12517-52_3	Human	9141	PDCD5	programmed cell death 5	O14737
12518-289	12518-289_3	Human	55193	PBRM1	polybromo 1	Q86U86
12521-3	12521-3_3	Human	1031	CDKN2C	cyclin-dependent kinase inhibitor 2C (p18, inhibits CDK4)	P42773
12522-6	12522-6_3	Human	5887	RAD23B	RAD23 homolog B (S. cerevisiae)	P54727
12524-18	12524-18_3	Human	112483	SAT2	spermidine/spermine N1-acetyltransferase family member 2	Q96F10
12527-50	12527-50_3	Human	7067	THRA	thyroid hormone receptor, alpha	P10827
12528-40	12528-40_3	Human	56897	WRNIP1	Werner helicase interacting protein 1	Q96S55
12529-32	12529-32_3	Human	8468	FKBP6	FK506 binding protein 6, 36kDa	O75344
12530-14	12530-14_3	Human	1163	CKS1B	CDC28 protein kinase regulatory subunit 1B	P61024
12531-5	12531-5_3	Human	147664	ERVV-1	endogenous retrovirus group V, member 1	B6SEH8
12532-28	12532-28_3	Human	997	CDC34	cell division cycle 34 homolog (S. cerevisiae)	P49427
12533-135	12533-135_3	Human	9266	CYTH2	cytohesin 2	Q99418
12534-10	12534-10_3	Human	10241	CALCOCO2	calcium binding and coiled-coil domain 2	Q13137
12535-2	12535-2_3	Human	7515	XRCC1	X-ray repair complementing defective repair in Chinese hamster cells 1	P18887
12536-46	12536-46_3	Human	9107	MTMR6	myotubularin related protein 6	Q9Y217
12537-88	12537-88_3	Human	5813	PURA	purine-rich element binding protein A	Q00577
12538-19	12538-19_3	Human	6000	RGS7	regulator of G-protein signaling 7	P49802
12540-25	12540-25_3	Human	391	RHOG	ras homolog gene family, member G (rho G)	P84095
12543-76	12543-76_3	Human	147741	ZNF560	zinc finger protein 560	Q96MR9
12546-1	12546-1_3	Human	6525	SMTN	smoothelin	P53814
12548-75	12548-75_3	Human	64121	RRAGC	Ras-related GTP binding C	Q9HB90
12549-33	12549-33_3	Human	27306	HPGDS	hematopoietic prostaglandin D synthase	O60760
12551-3	12551-3_3	Human	83737	ITCH	itchy E3 ubiquitin protein ligase homolog (mouse)	Q96J02
12553-5	12553-5_3	Human	7443	VRK1	vaccinia related kinase 1	Q99986
12554-10	12554-10_3	Human	5892	RAD51D	RAD51 homolog D (S. cerevisiae)	O75771
12556-7	12556-7_3	Human	11065	UBE2C	ubiquitin-conjugating enzyme E2C	O00762
12557-18	12557-18_3	Human	4857	NOVA1	neuro-oncological ventral antigen 1	P51513
12558-3	12558-3_3	Human	84959	UBASH3B	ubiquitin associated and SH3 domain containing B	Q8TF42
12560-9	12560-9_3	Human	30833	NT5C	5', 3'-nucleotidase, cytosolic	Q8TCD5
12562-1	12562-1_3	Human	5585	PKN1	protein kinase N1	Q16512
12563-2	12563-2_3	Human	25816	TNFAIP8	tumor necrosis factor, alpha-induced protein 8	O95379
12564-9	12564-9_3	Human	51388	NIP7	nuclear import 7 homolog (S. cerevisiae)	Q9Y221
12568-14	12568-14_3	Human	9817	KEAP1	kelch-like ECH-associated protein 1	Q14145
12569-25	12569-25_3	Human	22948	CCT5	chaperonin containing TCP1, subunit 5 (epsilon)	P48643
12571-14	12571-14_3	Human	403	ARL3	ADP-ribosylation factor-like 3	P36405
12572-236	12572-236_3	Human	10278	EFS	embryonal Fyn-associated substrate	O43281
12573-80	12573-80_3	Human	10612	TRIM3	tripartite motif containing 3	O75382
12574-36	12574-36_3	Human	1907	EDN2	endothelin 2	P20800
12575-30	12575-30_3	Human	4522	MTHFD1	methylenetetrahydrofolate dehydrogenase (NADP+ dependent) 1, methenyltetrahydrofolate cyclohydrolase, formyltetrahydrofolate synthetase	P11586
12576-21	12576-21_3	Human	4102	MAGEA3	melanoma antigen family A, 3	P43357
12577-100	12577-100_3	Human	2237	FEN1	flap structure-specific endonuclease 1	P39748
12578-13	12578-13_3	Human	377	ARF3	ADP-ribosylation factor 3	P61204
12580-7	12580-7_3	Human	5693	PSMB5	proteasome (prosome, macropain) subunit, beta type, 5	P28074
12581-39	12581-39_3	Human	3613	IMPA2	inositol(myo)-1(or 4)-monophosphatase 2	O14732
12583-77	12583-77_3	Human	369	ARAF	v-raf murine sarcoma 3611 viral oncogene homolog	P10398
12585-39	12585-39_3	Human	2067	ERCC1	excision repair cross-complementing rodent repair deficiency, complementation group 1 (includes overlapping antisense sequence)	P07992
12587-65	12587-65_3	Human	402	ARL2	ADP-ribosylation factor-like 2	P36404
12591-27	12591-27_3	Human	4983	OPHN1	oligophrenin 1	O60890
12593-33	12593-33_3	Human	81572	PDRG1	p53 and DNA-damage regulated 1	Q9NUG6
12594-5	12594-5_3	Human	25801	GCA	grancalcin, EF-hand calcium binding protein	P28676
12595-11	12595-11_3	Human	7111	TMOD1	tropomodulin 1	P28289
12597-68	12597-68_3	Human	9474	ATG5	ATG5 autophagy related 5 homolog (S. cerevisiae)	Q9H1Y0
12599-10	12599-10_3	Human	83706	FERMT3	fermitin family member 3	Q86UX7
12603-87	12603-87_3	Human	8761	PABPC4	poly(A) binding protein, cytoplasmic 4 (inducible form)	Q13310
12604-16	12604-16_3	Human	22955	SCMH1	sex comb on midleg homolog 1 (Drosophila)	Q96GD3
12605-1	12605-1_3	Human	51010	EXOSC3	exosome component 3	Q9NQT5
12612-37	12612-37_3	Human	5689	PSMB1	proteasome (prosome, macropain) subunit, beta type, 1	P20618
12616-45	12616-45_3	Human	29959	NRBP1	nuclear receptor binding protein 1	Q9UHY1
12617-2	12617-2_3	Human	8428	STK24	serine/threonine kinase 24	Q9Y6E0
12618-50	12618-50_3	Human	1645	AKR1C1	aldo-keto reductase family 1, member C1 (dihydrodiol dehydrogenase 1	Q04828
12619-14	12619-14_3	Human	5494	PPM1A	protein phosphatase, Mg2+/Mn2+ dependent, 1A	P35813
12620-3	12620-3_3	Human	55752	42624	septin 11	Q9NVA2
12621-55	12621-55_3	Human	5518	PPP2R1A	protein phosphatase 2, regulatory subunit A, alpha	P30153
12622-96	12622-96_3	Human	55870	ASH1L	ash1 (absent, small, or homeotic)-like (Drosophila)	Q9NR48
12623-84	12623-84_3	Human	3720	JARID2	jumonji, AT rich interactive domain 2	Q92833
12625-138	12625-138_3	Human	55975	KLHL7	kelch-like 7 (Drosophila)	Q8IXQ5
12626-6	12626-6_3	Human	57337	SENP7	SUMO1/sentrin specific peptidase 7	Q9BQF6
12627-97	12627-97_3	Human	10533	ATG7	ATG7 autophagy related 7 homolog (S. cerevisiae)	O95352
12628-31	12628-31_3	Human	55915	LANCL2	LanC lantibiotic synthetase component C-like 2 (bacterial)	Q9NS86
12630-8	12630-8_3	Human	23647	ARFIP2	ADP-ribosylation factor interacting protein 2	P53365
12632-14	12632-14_3	Human	9	NAT1	N-acetyltransferase 1 (arylamine N-acetyltransferase)	P18440
12633-3	12633-3_3	Human	5780	PTPN9	protein tyrosine phosphatase, non-receptor type 9	P43378
12634-79	12634-79_3	Human	8412	BCAR3	breast cancer anti-estrogen resistance 3	O75815
12635-9	12635-9_3	Human	1787	TRDMT1	tRNA aspartic acid methyltransferase 1	O14717
12636-113	12636-113_3	Human	56950	SMYD2	SET and MYND domain containing 2	Q9NRG4
12637-7	12637-7_3	Human	1384	CRAT	carnitine O-acetyltransferase	P43155
12641-3	12641-3_3	Human	3633	INPP5B	inositol polyphosphate-5-phosphatase, 75kDa	P32019
12643-4	12643-4_3	Human	408	ARRB1	arrestin, beta 1	P49407
12644-63	12644-63_3	Human	159	ADSS	adenylosuccinate synthase	P30520
12646-2	12646-2_3	Human	6120	RPE	ribulose-5-phosphate-3-epimerase	Q96AT9
12647-52	12647-52_3	Human	29072	SETD2	SET domain containing 2	Q9BYW2
12650-43	12650-43_3	Human	2773	GNAI3	guanine nucleotide binding protein (G protein), alpha inhibiting activity polypeptide 3	P08754
12651-21	12651-21_3	Human	5164	PDK2	pyruvate dehydrogenase kinase, isozyme 2	Q15119
12652-37	12652-37_3	Human	10768	AHCYL1	adenosylhomocysteinase-like 1	O43865
12653-13	12653-13_3	Human	1455	CSNK1G2	casein kinase 1, gamma 2	P78368
12655-30	12655-30_3	Human	63908	NAPB	N-ethylmaleimide-sensitive factor attachment protein, beta	Q9H115
12656-1	12656-1_3	Human	3831	KLC1	kinesin light chain 1	Q07866
12657-2	12657-2_3	Human	7264	TSTA3	tissue specific transplantation antigen P35B	Q13630
12658-72	12658-72_3	Human	79646	PANK3	pantothenate kinase 3	Q9H999
12659-13	12659-13_3	Human	29789	OLA1	Obg-like ATPase 1	Q9NTK5
12661-44	12661-44_3	Human	23710	GABARAPL1	GABA(A) receptor-associated protein like 1	Q9H0R8
12662-82	12662-82_3	Human	1891	ECH1	enoyl CoA hydratase 1, peroxisomal	Q13011
12663-1	12663-1_3	Human	7263	TST	thiosulfate sulfurtransferase (rhodanese)	Q16762
12664-19	12664-19_3	Human	5783	PTPN13	protein tyrosine phosphatase, non-receptor type 13 (APO-1/CD95 (Fas)-associated phosphatase)	Q12923
12665-16	12665-16_3	Human	3608	ILF2	interleukin enhancer binding factor 2, 45kDa	Q12905
12667-2	12667-2_3	Human	9615	GDA	guanine deaminase	Q9Y2T3
12668-7	12668-7_3	Human	9525	VPS4B	vacuolar protein sorting 4 homolog B (S. cerevisiae)	O75351
12669-30	12669-30_3	Human	23072	HECW1	HECT, C2 and WW domain containing E3 ubiquitin protein ligase 1	Q76N89
12670-15	12670-15_3	Human	5810	RAD1	RAD1 homolog (S. pombe)	O60671
12671-35	12671-35_3	Human	27284	SULT1B1	sulfotransferase family, cytosolic, 1B, member 1	O43704
12675-14	12675-14_3	Human	1615	DARS	aspartyl-tRNA synthetase	P14868
12676-1	12676-1_3	Human	29993	PACSIN1	protein kinase C and casein kinase substrate in neurons 1	Q9BY11
12677-164	12677-164_3	Human	2314	FLII	flightless I homolog (Drosophila)	Q13045
12678-66	12678-66_3	Human	6626	SNRPA	small nuclear ribonucleoprotein polypeptide A	P09012
12681-63	12681-63_3	Human	27005	USP21	ubiquitin specific peptidase 21	Q9UK80
12682-5	12682-5_3	Human	56267	KYAT3	cysteine conjugate-beta lyase 2	Q6YP21
12683-156	12683-156_3	Human	56896	DPYSL5	dihydropyrimidinase-like 5	Q9BPU6
12684-5	12684-5_3	Human	85477	SCIN	scinderin	Q9Y6U3
12685-57	12685-57_3	Human	9455	HOMER2	homer homolog 2 (Drosophila)	Q9NSB8
12686-15	12686-15_3	Human	4357	MPST	mercaptopyruvate sulfurtransferase	P25325
12687-2	12687-2_3	Human	1666	DECR1	2,4-dienoyl CoA reductase 1, mitochondrial	Q16698
12688-115	12688-115_3	Human	27330	RPS6KA6	ribosomal protein S6 kinase, 90kDa, polypeptide 6	Q9UK32
12689-56	12689-56_3	Human	10095	ARPC1B	actin related protein 2/3 complex, subunit 1B, 41kDa	O15143
12690-33	12690-33_3	Human	151011	42623	septin 10	Q9P0V9
12691-44	12691-44_3	Human	6472	SHMT2	serine hydroxymethyltransferase 2 (mitochondrial)	P34897
12692-56	12692-56_3	Human	84444	DOT1L	DOT1-like, histone H3 methyltransferase (S. cerevisiae)	Q8TEK3
12693-2	12693-2_3	Human	6451	SH3BGRL	SH3 domain binding glutamic acid-rich protein like	O75368
12694-28	12694-28_3	Human	27292	DIMT1	DIM1 dimethyladenosine transferase 1 homolog (S. cerevisiae)	Q9UNQ2
12695-62	12695-62_3	Human	59349	KLHL12	kelch-like 12 (Drosophila)	Q53G59
12696-166	12696-166_3	Human	10196	PRMT3	protein arginine methyltransferase 3	O60678
12697-30	12697-30_3	Human	5305	PIP4K2A	phosphatidylinositol-5-phosphate 4-kinase, type II, alpha	P48426
12698-72	12698-72_3	Human	3840	KPNA4	karyopherin alpha 4 (importin alpha 3)	O00629
12699-28	12699-28_3	Human	10694	CCT8	chaperonin containing TCP1, subunit 8 (theta)	P50990
12700-9	12700-9_3	Human	47	ACLY	ATP citrate lyase	P53396
12701-1	12701-1_3	Human	10289	EIF1B	eukaryotic translation initiation factor 1B	O60739
12702-13	12702-13_3	Human	57161	PELI2	pellino homolog 2 (Drosophila)	Q9HAT8
12703-6	12703-6_3	Human	140609	NEK7	NIMA (never in mitosis gene a)-related kinase 7	Q8TDX7
12704-26	12704-26_3	Human	10044	SH2D3C	SH2 domain containing 3C	Q8N5H7
12705-9	12705-9_3	Human	8925	HERC1	hect (homologous to the E6-AP (UBE3A) carboxyl terminus) domain and RCC1 (CHC1)-like domain (RLD) 1	Q15751
12706-2	12706-2_3	Human	8476	CDC42BPA	CDC42 binding protein kinase alpha (DMPK-like)	Q5VT25
12707-26	12707-26_3	Human	1809	DPYSL3	dihydropyrimidinase-like 3	Q14195
12708-91	12708-91_3	Human	83746	L3MBTL2	l(3)mbt-like 2 (Drosophila)	Q969R5
12709-63	12709-63_3	Human	8971	H1FX	H1 histone family, member X	Q92522
12711-19	12711-19_3	Human	2703	GJA8	gap junction protein, alpha 8, 50kDa	P48165
12712-9	12712-9_3	Human	10363	HMG20A	high mobility group 20A	Q9NP66
12713-365	12713-365_3	Human	10287	RGS19	regulator of G-protein signaling 19	P49795
12714-38	12714-38_3	Human	8906	AP1G2	adaptor-related protein complex 1, gamma 2 subunit	O75843
12715-30	12715-30_3	Human	196513	DCP1B	DCP1 decapping enzyme homolog B (S. cerevisiae)	Q8IZD4
12716-3	12716-3_3	Human	7728	ZNF175	zinc finger protein 175	Q9Y473
12717-65	12717-65_3	Human	27324	TOX3	TOX high mobility group box family member 3	O15405
12718-43	12718-43_3	Human	5303	PIN4	protein (peptidylprolyl cis/trans isomerase) NIMA-interacting, 4 (parvulin)	Q9Y237
12720-71	12720-71_3	Human	56893	UBQLN4	ubiquilin 4	Q9NRR5
12721-4	12721-4_3	Human	8887	TAX1BP1	Tax1 (human T-cell leukemia virus type I) binding protein 1	Q86VP1
12724-81	12724-81_3	Human	1153	CIRBP	cold inducible RNA binding protein	Q14011
12726-3	12726-3_3	Human	5994	RFXAP	regulatory factor X-associated protein	O00287
12727-7	12727-7_3	Human	5738	PTGFRN	prostaglandin F2 receptor negative regulator	Q9P2B2
12729-12	12729-12_3	Human	84262	PSMG3	proteasome (prosome, macropain) assembly chaperone 3	Q9BT73
12730-3	12730-3_3	Human	10403	NDC80	NDC80 homolog, kinetochore complex component (S. cerevisiae)	O14777
12731-12	12731-12_3	Human	144100	PLEKHA7	pleckstrin homology domain containing, family A member 7	Q6IQ23
12732-13	12732-13_3	Human	143098	MPP7	membrane protein, palmitoylated 7 (MAGUK p55 subfamily member 7)	Q5T2T1
12734-112	12734-112_3	Human	3835	KIF22	kinesin family member 22	Q14807
12735-39	12735-39_3	Human	7812	CSDE1	cold shock domain containing E1, RNA-binding	O75534
12737-12	12737-12_3	Human	5357	PLS1	plastin 1	Q14651
12738-43	12738-43_3	Human	11188	NISCH	nischarin	Q9Y2I1
12740-55	12740-55_3	Human	54738	FEV	FEV (ETS oncogene family)	Q99581
12742-160	12742-160_3	Human	51754	TMEM8B	transmembrane protein 8B	A6NDV4
12743-18	12743-18_3	Human	9529	BAG5	BCL2-associated athanogene 5	Q9UL15
12746-4	12746-4_3	Human	27128	CYTH4	cytohesin 4	Q9UIA0
12747-89	12747-89_3	Human	5935	RBM3	RNA binding motif (RNP1, RRM) protein 3	P98179
12748-6	12748-6_3	Human	676	BRDT	bromodomain, testis-specific	Q58F21
12750-9	12750-9_3	Human	3689	ITGB2	integrin, beta 2 (complement component 3 receptor 3 and 4 subunit)	P05107
12751-26	12751-26_3	Human	11244	ZHX1	zinc fingers and homeoboxes 1	Q9UKY1
12753-6	12753-6_3	Human	323	APBB2	amyloid beta (A4) precursor protein-binding, family B, member 2	Q92870
12754-14	12754-14_3	Human	27254	CSDC2	cold shock domain containing C2, RNA binding	Q9Y534
12756-3	12756-3_3	Human	60468	BACH2	BTB and CNC homology 1, basic leucine zipper transcription factor 2	Q9BYV9
12758-47	12758-47_3	Human	2895	GRID2	glutamate receptor, ionotropic, delta 2	O43424
12759-47	12759-47_3	Human	3609	ILF3	interleukin enhancer binding factor 3, 90kDa	Q12906
12760-34	12760-34_3	Human	342132	ZNF774	zinc finger protein 774	Q6NX45
12761-12	12761-12_3	Human	323	APBB2	amyloid beta (A4) precursor protein-binding, family B, member 2	Q92870
12763-69	12763-69_3	Human	55713	ZNF334	zinc finger protein 334	Q9HCZ1
12764-3	12764-3_3	Human	9844	ELMO1	engulfment and cell motility 1	Q92556
12766-33	12766-33_3	Human	350383	GPR142	G protein-coupled receptor 142	Q7Z601
12768-3	12768-3_3	Human	79660	PPP1R3B	protein phosphatase 1, regulatory (inhibitor) subunit 3B	Q86XI6
12771-19	12771-19_3	Human	7733	ZNF180	zinc finger protein 180	Q9UJW8
12772-8	12772-8_3	Human	4928	NUP98	nucleoporin 98kDa	P52948
12774-12	12774-12_3	Human	348980	HCN1	hyperpolarization activated cyclic nucleotide-gated potassium channel 1	O60741
12775-6	12775-6_3	Human	3149	HMGB3	high mobility group box 3	O15347
12777-11	12777-11_3	Human	7536	SF1	splicing factor 1	Q15637
12779-30	12779-30_3	Human	11108	PRDM4	PR domain containing 4	Q9UKN5
12781-2	12781-2_3	Human	6895	TARBP2	TAR (HIV-1) RNA binding protein 2	Q15633
12783-29	12783-29_3	Human	4670	HNRNPM	heterogeneous nuclear ribonucleoprotein M	P52272
12784-10	12784-10_3	Human	10307	APBB3	amyloid beta (A4) precursor protein-binding, family B, member 3	O95704
12785-49	12785-49_3	Human	10009	ZBTB33	zinc finger and BTB domain containing 33	Q86T24
12786-61	12786-61_3	Human	56261	GPCPD1	glycerophosphocholine phosphodiesterase GDE1 homolog (S. cerevisiae)	Q9NPB8
12787-47	12787-47_3	Human	7693	ZNF134	zinc finger protein 134	P52741
12788-6	12788-6_3	Human	112869	SGF29	coiled-coil domain containing 101	Q96ES7
12790-10	12790-10_3	Human	79714	CCDC51	coiled-coil domain containing 51	Q96ER9
12793-4	12793-4_3	Human	9271	PIWIL1	piwi-like 1 (Drosophila)	Q96J94
12794-6	12794-6_3	Human	147945	NLRP4	NLR family, pyrin domain containing 4	Q96MN2
12795-2	12795-2_3	Human	84924	ZNF566	zinc finger protein 566	Q969W8
12796-44	12796-44_3	Human	11165	NUDT3	nudix (nucleoside diphosphate linked moiety X)-type motif 3	O95989
12798-46	12798-46_3	Human	9498	SLC4A8	solute carrier family 4, sodium bicarbonate cotransporter, member 8	Q2Y0W8
12799-65	12799-65_3	Human	51277	DNAJC27	DnaJ (Hsp40) homolog, subfamily C, member 27	Q9NZQ0
12800-5	12800-5_3	Human	122664	TPPP2	tubulin polymerization-promoting protein family member 2	P59282
12801-33	12801-33_3	Human	3660	IRF2	interferon regulatory factor 2	P14316
12803-9	12803-9_3	Human	79673	ZNF329	zinc finger protein 329	Q86UD4
12804-5	12804-5_3	Human	26205	GMEB2	glucocorticoid modulatory element binding protein 2	Q9UKD1
12807-89	12807-89_3	Human	257106	ARHGAP30	Rho GTPase activating protein 30	Q7Z6I6
12808-103	12808-103_3	Human	23589	CARHSP1	calcium regulated heat stable protein 1, 24kDa	Q9Y2V2
12811-55	12811-55_3	Human	55786	ZNF415	zinc finger protein 415	Q09FC8
12812-25	12812-25_3	Human	98	ACYP2	acylphosphatase 2, muscle type	P14621
12813-18	12813-18_3	Human	23301	EHBP1	EH domain binding protein 1	Q8NDI1
12814-17	12814-17_3	Human	55599	RNPC3	RNA-binding region (RNP1, RRM) containing 3	Q96LT9
12815-9	12815-9_3	Human	3376	IARS	isoleucyl-tRNA synthetase	P41252
12817-1	12817-1_3	Human	2669	GEM	GTP binding protein overexpressed in skeletal muscle	P55040
12818-159	12818-159_3	Human	8170	SLC14A2	solute carrier family 14 (urea transporter), member 2	Q15849
12820-1	12820-1_3	Human	10750	GRAP	GRB2-related adaptor protein	Q13588
12821-6	12821-6_3	Human	338322	NLRP10	NLR family, pyrin domain containing 10	Q86W26
12822-34	12822-34_3	Human	322	APBB1	amyloid beta (A4) precursor protein-binding, family B, member 1 (Fe65)	O00213
12825-18	12825-18_3	Human	26060	APPL1	adaptor protein, phosphotyrosine interaction, PH domain and leucine zipper containing 1	Q9UKG1
12826-5	12826-5_3	Human	6528	SLC5A5	solute carrier family 5 (sodium iodide symporter), member 5	Q92911
12827-37	12827-37_3	Human	5998	RGS3	regulator of G-protein signaling 3	P49796
12830-4	12830-4_3	Human	10284	SAP18	Sin3A-associated protein, 18kDa	O00422
12831-21	12831-21_3	Human	54997	TESC	tescalcin	Q96BS2
12832-10	12832-10_3	Human	9070	ASH2L	ash2 (absent, small, or homeotic)-like (Drosophila)	Q9UBL3
12834-3	12834-3_3	Human	3754	KCNF1	potassium voltage-gated channel, subfamily F, member 1	Q9H3M0
12835-101	12835-101_3	Human	260434	PYDC1	PYD (pyrin domain) containing 1	Q8WXC3
12838-28	12838-28_3	Human	128853	DUSP15	dual specificity phosphatase 15	Q9H1R2
12842-43	12842-43_3	Human	8677	STX10	syntaxin 10	O60499
12843-6	12843-6_3	Human	57862	ZNF410	zinc finger protein 410	Q86VK4
12844-10	12844-10_3	Human	9530	BAG4	BCL2-associated athanogene 4	O95429
12845-18	12845-18_3	Human	9784	SNX17	sorting nexin 17	Q15036
12846-3	12846-3_3	Human	26234	FBXL5	F-box and leucine-rich repeat protein 5	Q9UKA1
12847-27	12847-27_3	Human	8732	RNGTT	RNA guanylyltransferase and 5'-phosphatase	O60942
12848-9	12848-9_3	Human	9181	ARHGEF2	Rho/Rac guanine nucleotide exchange factor (GEF) 2	Q92974
12849-25	12849-25_3	Human	51527	GSKIP	chromosome 14 open reading frame 129	Q9P0R6
12851-5	12851-5_3	Human	27434	POLM	polymerase (DNA directed), mu	Q9NP87
12853-112	12853-112_3	Human	29767	TMOD2	tropomodulin 2 (neuronal)	Q9NZR1
12854-3	12854-3_3	Human	7005	TEAD3	TEA domain family member 3	Q99594
12855-16	12855-16_3	Human	57091	CASS4	Cas scaffolding protein family member 4	Q9NQ75
12856-14	12856-14_3	Human	65062	TMEM237	transmembrane protein 237	Q96Q45
12859-33	12859-33_3	Human	10455	ECI2	enoyl-CoA delta isomerase 2	O75521
12860-7	12860-7_3	Human	10777	ARPP21	cAMP-regulated phosphoprotein, 21kDa	Q9UBL0
12861-13	12861-13_3	Human	29766	TMOD3	tropomodulin 3 (ubiquitous)	Q9NYL9
12862-14	12862-14_3	Human	4739	NEDD9	neural precursor cell expressed, developmentally down-regulated 9	Q14511
12864-9	12864-9_3	Human	348938	NIPAL4	NIPA-like domain containing 4	Q0D2K0
12867-40	12867-40_3	Human	6990	DYNLT3	dynein, light chain, Tctex-type 3	P51808
12869-68	12869-68_3	Human	1656	DDX6	DEAD (Asp-Glu-Ala-Asp) box polypeptide 6	P26196
12871-10	12871-10_3	Human	5756	TWF1	twinfilin, actin-binding protein, homolog 1 (Drosophila)	Q12792
12872-35	12872-35_3	Human	1260	CNGA2	cyclic nucleotide gated channel alpha 2	Q16280
12873-11	12873-11_3	Human	6693	SPN	sialophorin	P16150
12875-28	12875-28_3	Human	92181	UBTD2	ubiquitin domain containing 2	Q8WUN7
12876-39	12876-39_3	Human	25876	SPEF1	sperm flagellar 1	Q9Y4P9
12878-60	12878-60_3	Human	114885	OSBPL11	oxysterol binding protein-like 11	Q9BXB4
12879-5	12879-5_3	Human	5933	RBL1	retinoblastoma-like 1 (p107)	P28749
12880-1	12880-1_3	Human	9900	SV2A	synaptic vesicle glycoprotein 2A	Q7L0J3
12881-17	12881-17_3	Human	8608	RDH16	retinol dehydrogenase 16 (all-trans)	O75452
12882-7	12882-7_3	Human	57097	PARP11	poly (ADP-ribose) polymerase family, member 11	Q9NR21
12885-42	12885-42_3	Human	9975	NR1D2	nuclear receptor subfamily 1, group D, member 2	Q14995
12888-18	12888-18_3	Human	8819	SAP30	Sin3A-associated protein, 30kDa	O75446
12891-1	12891-1_3	Human	79778	MICALL2	MICAL-like 2	Q8IY33
12892-10	12892-10_3	Human	84958	SYTL1	synaptotagmin-like 1	Q8IYJ3
12893-159	12893-159_3	Human	3428	IFI16	interferon, gamma-inducible protein 16	Q16666
12894-3	12894-3_3	Human	22976	PAXIP1	PAX interacting (with transcription-activation domain) protein 1	Q6ZW49
12895-28	12895-28_3	Human	1607	DGKB	diacylglycerol kinase, beta 90kDa	Q9Y6T7
12904-180	12904-180_3	Human	8029	CUBN	cubilin (intrinsic factor-cobalamin receptor)	O60494
12923-51	12923-51_3	Human	3872	KRT17	keratin 17	Q04695
12925-105	12925-105_3	Human	8313	AXIN2	axin 2	Q9Y2T1
12931-16	12931-16_3	Human	4306	NR3C2	nuclear receptor subfamily 3, group C, member 2	P08235
12933-17	12933-17_3	Human	55068	ENOX1	ecto-NOX disulfide-thiol exchanger 1	Q8TC92
12934-1	12934-1_3	Human	51191	HERC5	hect domain and RLD 5	Q9UII4
12936-38	12936-38_3	Human	6017	RLBP1	retinaldehyde binding protein 1	P12271
12939-1	12939-1_3	Human	9533	POLR1C	polymerase (RNA) I polypeptide C, 30kDa	O15160
12940-35	12940-35_3	Human	221	ALDH3B1	aldehyde dehydrogenase 3 family, member B1	P43353
12945-33	12945-33_3	Human	22931	RAB18	RAB18, member RAS oncogene family	Q9NP72
12954-71	12954-71_3	Human	5465	PPARA	peroxisome proliferator-activated receptor alpha	Q07869
12956-40	12956-40_3	Human	26128	KIF1BP	KIAA1279	Q96EK5
12957-62	12957-62_3	Human	7381	UQCRB	ubiquinol-cytochrome c reductase binding protein	P14927
12960-9	12960-9_3	Human	2645	GCK	glucokinase (hexokinase 4)	P35557
12963-1	12963-1_3	Human	57720	GPR107	G protein-coupled receptor 107	Q5VW38
12968-2	12968-2_3	Human	1466	CSRP2	cysteine and glycine-rich protein 2	Q16527
12970-35	12970-35_3	Human	27067	STAU2	staufen, RNA binding protein, homolog 2 (Drosophila)	Q9NUL3
12975-11	12975-11_3	Human	54474	KRT20	keratin 20	P35900
12976-49	12976-49_3	Human	10174	SORBS3	sorbin and SH3 domain containing 3	O60504
12980-31	12980-31_3	Human	55696	RBM22	RNA binding motif protein 22	Q9NW64
12986-12	12986-12_3	Human	55327	LIN7C	lin-7 homolog C (C. elegans)	Q9NUP9
12987-12	12987-12_3	Human	6432	SRSF7	serine/arginine-rich splicing factor 7	Q16629
12988-49	12988-49_3	Human	2130	EWSR1	Ewing sarcoma breakpoint region 1	Q01844
12990-39	12990-39_3	Human	4215	MAP3K3	mitogen-activated protein kinase kinase kinase 3	Q99759
12991-49	12991-49_3	Human	23113	CUL9	cullin 9	Q8IWT3
12993-21	12993-21_3	Human	55666	NPLOC4	nuclear protein localization 4 homolog (S. cerevisiae)	Q8TAT6
13007-66	13007-66_3	Human	414332	LCN10	lipocalin 10	Q6JVE6
13011-20	13011-20_3	Human	6204	RPS10	ribosomal protein S10	P46783
13013-41	13013-41_3	Human	5071	PARK2	parkinson protein 2, E3 ubiquitin protein ligase (parkin)	O60260
13022-20	13022-20_3	Human	9537	TP53I11	tumor protein p53 inducible protein 11	O14683
13025-4	13025-4_3	Human	10818	FRS2	fibroblast growth factor receptor substrate 2	Q8WU20
13027-20	13027-20_3	Human	23492	CBX7	chromobox homolog 7	O95931
13032-1	13032-1_3	Human	8678	BECN1	beclin 1, autophagy related	Q14457
13039-1	13039-1_3	Human	5511	PPP1R8	protein phosphatase 1, regulatory (inhibitor) subunit 8	Q12972
13041-47	13041-47_3	Human	9618	TRAF4	TNF receptor-associated factor 4	Q9BUZ4
13042-7	13042-7_3	Human	3744	KCNA10	potassium voltage-gated channel, shaker-related subfamily, member 10	Q16322
13043-157	13043-157_3	Human	29028	ATAD2	ATPase family, AAA domain containing 2	Q6PL18
13044-5	13044-5_3	Human	7251	TSG101	tumor susceptibility gene 101	Q99816
13053-6	13053-6_3	Human	11254	SLC6A14	solute carrier family 6 (amino acid transporter), member 14	Q9UN76
13055-53	13055-53_3	Human	5662	PSD	pleckstrin and Sec7 domain containing	A5PKW4
13056-18	13056-18_3	Human	28968	SLC6A16	solute carrier family 6, member 16	Q9GZN6
13059-33	13059-33_3	Human	55312	RFK	riboflavin kinase	Q969G6
13062-4	13062-4_3	Human	9535	GMFG	glia maturation factor, gamma	O60234
13066-42	13066-42_3	Human	23644	EDC4	enhancer of mRNA decapping 4	Q6P2E9
13067-5	13067-5_3	Human	5592	PRKG1	protein kinase, cGMP-dependent, type I	Q13976
13068-139	13068-139_3	Human	9973	CCS	copper chaperone for superoxide dismutase	O14618
13073-14	13073-14_3	Human	8125	ANP32A	acidic (leucine-rich) nuclear phosphoprotein 32 family, member A	P39687
13076-4	13076-4_3	Human	8087	FXR1	fragile X mental retardation, autosomal homolog 1	P51114
13078-3	13078-3_3	Human	1069	CETN2	centrin, EF-hand protein, 2	P41208
13082-9	13082-9_3	Human	55898	UNC45A	unc-45 homolog A (C. elegans)	Q9H3U1
13083-18	13083-18_3	Human	7407	VARS	valyl-tRNA synthetase	P26640
13085-18	13085-18_3	Human	2740	GLP1R	glucagon-like peptide 1 receptor	P43220
13088-397	13088-397_3	Human	685	BTC	betacellulin	P35070
13089-6	13089-6_3	Human	3091	HIF1A	hypoxia inducible factor 1, alpha subunit (basic helix-loop-helix transcription factor)	Q16665
13090-17	13090-17_3	Human	6277	S100A6	S100 calcium binding protein A6	P06703
13093-6	13093-6_3	Human	6398	SECTM1	secreted and transmembrane 1	Q8WVN6
13094-75	13094-75_3	Human	84870	RSPO3	R-spondin 3	Q9BXY4
13095-51	13095-51_3	Human	5967	REG1A	regenerating islet-derived 1 alpha	P05451
13097-11	13097-11_3	Human	599	BCL2L2	BCL2-like 2	Q92843
13098-93	13098-93_3	Human	2277	VEGFD	c-fos induced growth factor (vascular endothelial growth factor D)	O43915
13101-60	13101-60_3	Human	50964	SOST	sclerostin	Q9BQB4
13102-1	13102-1_3	Human	131177	FAM3D	family with sequence similarity 3, member D	Q96BQ1
13103-125	13103-125_3	Human	1442	CSH1	chorionic somatomammotropin hormone 1 (placental lactogen)	P0DML2|P0DML3
13103-125	13103-125_3	Human	1443	CSH2	chorionic somatomammotropin hormone 2	P0DML2|P0DML3
13104-32	13104-32_3	Human	1947	EFNB1	ephrin-B1	P98172
13105-7	13105-7_3	Human	6616	SNAP25	synaptosomal-associated protein, 25kDa	P60880
13107-9	13107-9_3	Human	27076	LYPD3	LY6/PLAUR domain containing 3	O95274
13109-82	13109-82_3	Human	257194	NEGR1	neuronal growth regulator 1	Q7Z3B1
13111-79	13111-79_3	Human	604	BCL6	B-cell CLL/lymphoma 6	P41182
13112-179	13112-179_3	Human	11167	FSTL1	follistatin-like 1	Q12841
13113-7	13113-7_3	Human	6696	SPP1	secreted phosphoprotein 1	P10451
13114-50	13114-50_3	Human	4060	LUM	lumican	P51884
13116-25	13116-25_3	Human	57126	CD177	CD177 molecule	Q8N6Q3
13118-5	13118-5_3	Human	64093	SMOC1	SPARC related modular calcium binding 1	Q9H4F8
13119-26	13119-26_3	Human	51156	SERPINA10	serpin peptidase inhibitor, clade A (alpha-1 antiproteinase, antitrypsin), member 10	Q9UK55
13122-19	13122-19_3	Human	23768	FLRT2	fibronectin leucine rich transmembrane protein 2	O43155
13123-3	13123-3_3	Human	23767	FLRT3	fibronectin leucine rich transmembrane protein 3	Q9NZU0
13124-20	13124-20_3	Human	57611	ISLR2	immunoglobulin superfamily containing leucine-rich repeat 2	Q6UXK2
13125-45	13125-45_3	Human	7448	VTN	vitronectin	P04004
13126-52	13126-52_3	Human	1824	DSC2	desmocollin 2	Q02487
13129-40	13129-40_3	Human	3949	LDLR	low density lipoprotein receptor	P01130
13130-150	13130-150_3	Human	3099	HK2	hexokinase 2	P52789
13131-5	13131-5_3	Human	3098	HK1	hexokinase 1	P19367
13132-14	13132-14_3	Human	9037	SEMA5A	sema domain, seven thrombospondin repeats (type 1 and type 1-like), transmembrane domain (TM) and short cytoplasmic domain, (semaphorin) 5A	Q13591
13133-73	13133-73_3	Human	8425	LTBP4	latent transforming growth factor beta binding protein 4	Q8N2S1
13228-75	13228-75_3	Human	4193	MDM2	Mdm2 p53 binding protein homolog (mouse)	Q00987
13229-20	13229-20_3	Human	4194	MDM4	Mdm4 p53 binding protein homolog (mouse)	O15151
13230-174	13230-174_3	Human	3501	IGHG2	immunoglobulin heavy constant gamma 2 (G2m marker)	P01859
13231-90	13231-90_3	Human	3503	IGHG4	immunoglobulin heavy constant gamma 4 (G4m marker)	P01861
13236-25	13236-25_3	Human	89780	WNT3A	wingless-type MMTV integration site family, member 3A	P56704
13240-170	13240-170_3	Human	50944	SHANK1	SH3 and multiple ankyrin repeat domains 1	Q9Y566
13242-134	13242-134_3	Human	85358	SHANK3	SH3 and multiple ankyrin repeat domains 3	Q9BYB0
13268-45	13268-45_3	Human	7474	WNT5A	wingless-type MMTV integration site family, member 5A	P41221
13374-4	13374-4_3	Human	245927	DEFB113	defensin, beta 113	Q30KQ7
13375-48	13375-48_3	Human	9143	SYNGR3	synaptogyrin 3	O43761
13377-3	13377-3_3	Human	284613	CYB561D1	cytochrome b-561 domain containing 1	Q8N8Q1
13378-80	13378-80_3	Human	401207	C5orf63	chromosome 5 open reading frame 63	A6NC05
13381-49	13381-49_3	Human	2683	B4GALT1	UDP-Gal:betaGlcNAc beta 1,4- galactosyltransferase, polypeptide 1	P15291
13384-110	13384-110_3	Human	2271	FH	fumarate hydratase	P07954
13386-248	13386-248_3	Human	80196	RNF34	ring finger protein 34	Q969K3
13387-55	13387-55_3	Human	26298	EHF	ets homologous factor	Q9NZC4
13388-57	13388-57_3	Human	5122	PCSK1	proprotein convertase subtilisin/kexin type 1	P29120
13392-13	13392-13_3	Human	481	ATP1B1	ATPase, Na+/K+ transporting, beta 1 polypeptide	P05026
13393-46	13393-46_3	Human	79139	DERL1	Der1-like domain family, member 1	Q9BUN8
13397-88	13397-88_3	Human	1673	DEFB4A	defensin, beta 4A	O15263
13399-33	13399-33_3	Human	768211	RELL1	RELT-like 1	Q8IUW5
13403-5	13403-5_3	Human	2119	ETV5	ets variant 5	P41161
13405-61	13405-61_3	Human	6691	SPINK2	serine peptidase inhibitor, Kazal type 2 (acrosin-trypsin inhibitor)	P20155
13411-21	13411-21_3	Human	10193	RNF41	ring finger protein 41	Q9H4P4
13412-5	13412-5_3	Human	140870	WFDC6	WAP four-disulfide core domain 6	Q9BQY6
13416-8	13416-8_3	Human	121256	TMEM132D	transmembrane protein 132D	Q14C87
13421-17	13421-17_3	Human	56900	TMEM167B	transmembrane protein 167B	Q9NRX6
13422-66	13422-66_3	Human	10495	ENOX2	ecto-NOX disulfide-thiol exchanger 2	Q16206
13423-94	13423-94_3	Human	84293	FAM213A	chromosome 10 open reading frame 58	Q9BRX8
13427-66	13427-66_3	Human	57134	MAN1C1	mannosidase, alpha, class 1C, member 1	Q9NR34
13429-3	13429-3_3	Human	140832	WFDC10A	WAP four-disulfide core domain 10A	Q9H1F0
13430-50	13430-50_3	Human	6563	SLC14A1	solute carrier family 14 (urea transporter), member 1 (Kidd blood group)	Q13336
13431-74	13431-74_3	Human	348378	FAM159A	family with sequence similarity 159, member A	Q6UWV7
13434-172	13434-172_3	Human	55742	PARVA	parvin, alpha	Q9NVD7
13435-31	13435-31_3	Human	53833	IL20RB	interleukin 20 receptor beta	Q6UXL0
13436-54	13436-54_3	Human	4150	MAZ	MYC-associated zinc finger protein (purine-binding transcription factor)	P56270
13438-115	13438-115_3	Human	8646	CHRD	chordin	Q9H2X0
13439-6	13439-6_3	Human	401067	IQCF3	IQ motif containing F3	P0C7M6
13441-30	13441-30_3	Human	85458	DIXDC1	DIX domain containing 1	Q155Q3
13447-42	13447-42_3	Human	503542	SPRN	shadow of prion protein homolog (zebrafish)	Q5BIV9
13449-25	13449-25_3	Human	10262	SF3B4	splicing factor 3b, subunit 4, 49kDa	Q15427
13450-49	13450-49_3	Human	9101	USP8	ubiquitin specific peptidase 8	P40818
13451-2	13451-2_3	Human	64838	FNDC4	fibronectin type III domain containing 4	Q9H6D8
13452-113	13452-113_3	Human	221710	SMIM13	hypothetical protein LOC221710	P0DJ93
13453-2	13453-2_3	Human	9553	MRPL33	mitochondrial ribosomal protein L33	O75394
13457-33	13457-33_3	Human	2001	ELF5	E74-like factor 5 (ets domain transcription factor)	Q9UKW6
13459-30	13459-30_3	Human	54863	TOR4A	chromosome 9 open reading frame 167	Q9NXH8
13460-4	13460-4_3	Human	1101	CHAD	chondroadherin	O15335
13463-1	13463-1_3	Human	7837	PXDN	peroxidasin homolog (Drosophila)	Q92626
13464-8	13464-8_3	Human	400258	C14orf180	chromosome 14 open reading frame 180	Q8N912
13465-5	13465-5_3	Human	1827	RCAN1	regulator of calcineurin 1	P53805
13468-5	13468-5_3	Human	84461	NEURL4	neuralized homolog 4 (Drosophila)	Q96JN8
13470-43	13470-43_3	Human	5745	PTH1R	parathyroid hormone 1 receptor	Q03431
13472-35	13472-35_3	Human	84064	HDHD2	haloacid dehalogenase-like hydrolase domain containing 2	Q9H0R4
13473-55	13473-55_3	Human	3706	ITPKA	inositol-trisphosphate 3-kinase A	P23677
13474-40	13474-40_3	Human	373156	GSTK1	glutathione S-transferase kappa 1	Q9Y2Q3
13475-10	13475-10_3	Human	51619	UBE2D4	ubiquitin-conjugating enzyme E2D 4 (putative)	Q9Y2X8
13476-16	13476-16_3	Human	22944	KIN	KIN, antigenic determinant of recA protein homolog (mouse)	O60870
13477-65	13477-65_3	Human	1241	LTB4R	leukotriene B4 receptor	Q15722
13479-8	13479-8_3	Human	284069	FAM171A2	family with sequence similarity 171, member A2	A8MVW0
13481-24	13481-24_3	Human	6919	TCEA2	transcription elongation factor A (SII), 2	Q15560
13482-14	13482-14_3	Human	23019	CNOT1	CCR4-NOT transcription complex, subunit 1	A5YKK6
13484-69	13484-69_3	Human	1277	COL1A1	collagen, type I, alpha 1	P02452
13485-20	13485-20_3	Human	84910	TMEM87B	transmembrane protein 87B	Q96K49
13486-9	13486-9_3	Human	5311	PKD2	polycystic kidney disease 2 (autosomal dominant)	Q13563
13487-24	13487-24_3	Human	81622	UNC93B1	unc-93 homolog B1 (C. elegans)	Q9H1C4
13488-3	13488-3_3	Human	27236	ARFIP1	ADP-ribosylation factor interacting protein 1	P53367
13490-1	13490-1_3	Human	51678	MPP6	membrane protein, palmitoylated 6 (MAGUK p55 subfamily member 6)	Q9NZW5
13491-40	13491-40_3	Human	5147	PDE6D	phosphodiesterase 6D, cGMP-specific, rod, delta	O43924
13492-44	13492-44_3	Human	3313	HSPA9	heat shock 70kDa protein 9 (mortalin)	P38646
13493-5	13493-5_3	Human	2894	GRID1	glutamate receptor, ionotropic, delta 1	Q9ULK0
13494-6	13494-6_3	Human	91012	CERS5	ceramide synthase 5	Q8N5B7
13495-48	13495-48_3	Human	338442	HCAR2	hydroxycarboxylic acid receptor 2	Q8TDS4
13496-19	13496-19_3	Human	3157	HMGCS1	3-hydroxy-3-methylglutaryl-CoA synthase 1 (soluble)	Q01581
13497-34	13497-34_3	Human	8669	EIF3J	eukaryotic translation initiation factor 3, subunit J	O75822
13498-1	13498-1_3	Human	55586	MIOX	myo-inositol oxygenase	Q9UGB7
13499-30	13499-30_3	Human	2157	F8	coagulation factor VIII, procoagulant component	P00451
13501-10	13501-10_3	Human	80723	SLC35G2	transmembrane protein 22	Q8TBE7
13502-2	13502-2_3	Human	284129	SLC26A11	solute carrier family 26, member 11	Q86WA9
13503-19	13503-19_3	Human	10550	ARL6IP5	ADP-ribosylation-like factor 6 interacting protein 5	O75915
13506-10	13506-10_3	Human	54920	DUS2	dihydrouridine synthase 2-like, SMM1 homolog (S. cerevisiae)	Q9NX74
13507-51	13507-51_3	Human	8717	TRADD	TNFRSF1A-associated via death domain	Q15628
13509-5	13509-5_3	Human	192683	SCAMP5	secretory carrier membrane protein 5	Q8TAC9
13510-7	13510-7_3	Human	489	ATP2A3	ATPase, Ca++ transporting, ubiquitous	Q93084
13511-29	13511-29_3	Human	6304	SATB1	SATB homeobox 1	Q01826
13512-28	13512-28_3	Human	10236	HNRNPR	heterogeneous nuclear ribonucleoprotein R	O43390
13513-174	13513-174_3	Human	10401	PIAS3	protein inhibitor of activated STAT, 3	Q9Y6X2
13514-121	13514-121_3	Human	11021	RAB35	RAB35, member RAS oncogene family	Q15286
13515-8	13515-8_3	Human	55197	RPRD1A	regulation of nuclear pre-mRNA domain containing 1A	Q96P16
13516-46	13516-46_3	Human	51234	EMC4	transmembrane protein 85	Q5J8M3
13517-3	13517-3_3	Human	374308	PTCHD3	patched domain containing 3	Q3KNS1
13518-5	13518-5_3	Human	8853	ASAP2	ArfGAP with SH3 domain, ankyrin repeat and PH domain 2	O43150
13519-112	13519-112_3	Human	115557	ARHGEF25	Rho guanine nucleotide exchange factor (GEF) 25	Q86VW2
13522-20	13522-20_3	Human	7447	VSNL1	visinin-like 1	P62760
13524-25	13524-25_3	Human	90161	HS6ST2	heparan sulfate 6-O-sulfotransferase 2	Q96MM7
13525-17	13525-17_3	Human	93107	KCNG4	potassium voltage-gated channel, subfamily G, member 4	Q8TDN1
13526-5	13526-5_3	Human	6741	SSB	Sjogren syndrome antigen B (autoantigen La)	P05455
13529-39	13529-39_3	Human	4674	NAP1L2	nucleosome assembly protein 1-like 2	Q9ULW6
13530-5	13530-5_3	Human	2837	UTS2R	urotensin 2 receptor	Q9UKP6
13532-25	13532-25_3	Human	255919	CNEP1R1	transmembrane protein 188	Q8N9A8
13534-20	13534-20_3	Human	9172	MYOM2	myomesin (M-protein) 2, 165kDa	P54296
13535-2	13535-2_3	Human	10087	COL4A3BP	collagen, type IV, alpha 3 (Goodpasture antigen) binding protein	Q9Y5P4
13536-56	13536-56_3	Human	11201	POLI	polymerase (DNA directed) iota	Q9UNA4
13539-131	13539-131_3	Human	3780	KCNN1	potassium intermediate/small conductance calcium-activated channel, subfamily N, member 1	Q92952
13540-1	13540-1_3	Human	2849	GPR26	G protein-coupled receptor 26	Q8NDV2
13541-1	13541-1_3	Human	80177	MYCT1	myc target 1	Q8N699
13544-9	13544-9_3	Human	23526	ARHGAP45	histocompatibility (minor) HA-1	Q92619
13545-97	13545-97_3	Human	84285	EIF1AD	eukaryotic translation initiation factor 1A domain containing	Q8N9N8
13547-5	13547-5_3	Human	3363	HTR7	5-hydroxytryptamine (serotonin) receptor 7 (adenylate cyclase-coupled)	P34969
13548-53	13548-53_3	Human	196051	PLPP4	phosphatidic acid phosphatase type 2 domain containing 1A	Q5VZY2
13549-15	13549-15_3	Human	11086	ADAM29	ADAM metallopeptidase domain 29	Q9UKF5
13552-7	13552-7_3	Human	23075	SWAP70	SWAP switching B-cell complex 70kDa subunit	Q9UH65
13553-4	13553-4_3	Human	123879	DCUN1D3	DCN1, defective in cullin neddylation 1, domain containing 3 (S. cerevisiae)	Q8IWE4
13554-78	13554-78_3	Human	29803	REPIN1	replication initiator 1	Q9BWE0
13556-28	13556-28_3	Human	3356	HTR2A	5-hydroxytryptamine (serotonin) receptor 2A	P28223
13557-3	13557-3_3	Human	25945	NECTIN3	poliovirus receptor-related 3	Q9NQS3
13561-5	13561-5_3	Human	3362	HTR6	5-hydroxytryptamine (serotonin) receptor 6	P50406
13563-259	13563-259_3	Human	414149	ACBD7	acyl-CoA binding domain containing 7	Q8N6N7
13565-2	13565-2_3	Human	5934	RBL2	retinoblastoma-like 2 (p130)	Q08999
13566-2	13566-2_3	Human	29101	SSU72	SSU72 RNA polymerase II CTD phosphatase homolog (S. cerevisiae)	Q9NP77
13567-1	13567-1_3	Human	1808	DPYSL2	dihydropyrimidinase-like 2	Q16555
13568-30	13568-30_3	Human	5710	PSMD4	proteasome (prosome, macropain) 26S subunit, non-ATPase, 4	P55036
13570-43	13570-43_3	Human	3069	HDLBP	high density lipoprotein binding protein	Q00341
13572-43	13572-43_3	Human	5717	PSMD11	proteasome (prosome, macropain) 26S subunit, non-ATPase, 11	O00231
13573-5	13573-5_3	Human	10094	ARPC3	actin related protein 2/3 complex, subunit 3, 21kDa	O15145
13574-50	13574-50_3	Human	27289	RND1	Rho family GTPase 1	Q92730
13575-40	13575-40_3	Human	1856	DVL2	dishevelled, dsh homolog 2 (Drosophila)	O14641
13577-25	13577-25_3	Human	11338	U2AF2	U2 small nuclear RNA auxiliary factor 2	P26368
13578-98	13578-98_3	Human	22885	ABLIM3	actin binding LIM protein family, member 3	O94929
13580-2	13580-2_3	Human	6675	UAP1	UDP-N-acteylglucosamine pyrophosphorylase 1	Q16222
13583-19	13583-19_3	Human	317	APAF1	apoptotic peptidase activating factor 1	O14727
13587-10	13587-10_3	Human	29127	RACGAP1	Rac GTPase activating protein 1	Q9H0H5
13588-11	13588-11_3	Human	8416	ANXA9	annexin A9	O76027
13589-10	13589-10_3	Human	10307	APBB3	amyloid beta (A4) precursor protein-binding, family B, member 3	O95704
13590-1	13590-1_3	Human	25996	REXO2	REX2, RNA exonuclease 2 homolog (S. cerevisiae)	Q9Y3B8
13591-31	13591-31_3	Human	5557	PRIM1	primase, DNA, polypeptide 1 (49kDa)	P49642
13594-158	13594-158_3	Human	26088	GGA1	golgi-associated, gamma adaptin ear containing, ARF binding protein 1	Q9UJY5
13595-20	13595-20_3	Human	79178	THTPA	thiamine triphosphatase	Q9BU02
13596-3	13596-3_3	Human	5874	RAB27B	RAB27B, member RAS oncogene family	O00194
13597-20	13597-20_3	Human	11031	RAB31	RAB31, member RAS oncogene family	Q13636
13599-15	13599-15_3	Human	10244	RABEPK	Rab9 effector protein with kelch motifs	Q7Z6M1
13602-6	13602-6_3	Human	4809	SNU13	NHP2 non-histone chromosome protein 2-like 1 (S. cerevisiae)	P55769
13603-7	13603-7_3	Human	317671	RFESD	Rieske (Fe-S) domain containing	Q8TAC1
13604-27	13604-27_3	Human	9148	NEURL1	neuralized homolog (Drosophila)	O76050
13605-16	13605-16_3	Human	11199	ANXA10	annexin A10	Q9UJ72
13609-11	13609-11_3	Human	2969	GTF2I	general transcription factor IIi	P78347
13610-9	13610-9_3	Human	4109	MAGEA10	melanoma antigen family A, 10	P43363
13612-7	13612-7_3	Human	9595	CYTIP	cytohesin 1 interacting protein	O60759
13613-23	13613-23_3	Human	26289	AK5	adenylate kinase 5	Q9Y6K8
13614-6	13614-6_3	Human	1387	CREBBP	CREB binding protein	Q92793
13615-60	13615-60_3	Human	8440	NCK2	NCK adaptor protein 2	O43639
13618-15	13618-15_3	Human	8379	MAD1L1	MAD1 mitotic arrest deficient-like 1 (yeast)	Q9Y6D9
13620-10	13620-10_3	Human	439	ASNA1	arsA arsenite transporter, ATP-binding, homolog 1 (bacterial)	O43681
13621-31	13621-31_3	Human	161	AP2A2	adaptor-related protein complex 2, alpha 2 subunit	O94973
13622-16	13622-16_3	Human	5525	PPP2R5A	protein phosphatase 2, regulatory subunit B', alpha	Q15172
13623-4	13623-4_3	Human	8085	KMT2D	myeloid/lymphoid or mixed-lineage leukemia 2	O14686
13624-17	13624-17_3	Human	65220	NADK	NAD kinase	O95544
13625-19	13625-19_3	Human	6741	SSB	Sjogren syndrome antigen B (autoantigen La)	P05455
13628-58	13628-58_3	Human	2888	GRB14	growth factor receptor-bound protein 14	Q14449
13629-25	13629-25_3	Human	23192	ATG4B	ATG4 autophagy related 4 homolog B (S. cerevisiae)	Q9Y4P1
13631-1	13631-1_3	Human	5929	RBBP5	retinoblastoma binding protein 5	Q15291
13632-10	13632-10_3	Human	7791	ZYX	zyxin	Q15942
13634-209	13634-209_3	Human	8544	PIR	pirin (iron-binding nuclear protein)	O00625
13636-20	13636-20_3	Human	4673	NAP1L1	nucleosome assembly protein 1-like 1	P55209
13639-101	13639-101_3	Human	8615	USO1	USO1 vesicle docking protein homolog (yeast)	O60763
13642-90	13642-90_3	Human	3437	IFIT3	interferon-induced protein with tetratricopeptide repeats 3	O14879
13644-30	13644-30_3	Human	9146	HGS	hepatocyte growth factor-regulated tyrosine kinase substrate	O14964
13645-14	13645-14_3	Human	9785	DHX38	DEAH (Asp-Glu-Ala-His) box polypeptide 38	Q92620
13650-11	13650-11_3	Human	30820	KCNIP1	Kv channel interacting protein 1	Q9NZI2
13651-54	13651-54_3	Human	80829	ZFP91	zinc finger protein 91 homolog (mouse)	Q96JP5
13652-2	13652-2_3	Human	10040	TOM1L1	target of myb1 (chicken)-like 1	O75674
13653-335	13653-335_3	Human	28992	MACROD1	MACRO domain containing 1	Q9BQ69
13654-1	13654-1_3	Human	9475	ROCK2	Rho-associated, coiled-coil containing protein kinase 2	O75116
13655-34	13655-34_3	Human	4691	NCL	nucleolin	P19338
13657-2	13657-2_3	Human	11284	PNKP	polynucleotide kinase 3'-phosphatase	Q96T60
13658-31	13658-31_3	Human	56034	PDGFC	platelet derived growth factor C	Q9NRA1
13659-36	13659-36_3	Human	57130	ATP13A1	ATPase type 13A1	Q9HD20
13665-35	13665-35_3	Human	5523	PPP2R3A	protein phosphatase 2, regulatory subunit B'', alpha	Q06190
13666-222	13666-222_3	Human	56934	CA10	carbonic anhydrase X	Q9NS85
13669-6	13669-6_3	Human	2261	FGFR3	fibroblast growth factor receptor 3	P22607
13671-40	13671-40_3	Human	1991	ELANE	elastase, neutrophil expressed	P08246
13672-3	13672-3_3	Human	3310	HSPA6	heat shock 70kDa protein 6 (HSP70B')	P17066
13673-21	13673-21_3	Human	10574	CCT7	chaperonin containing TCP1, subunit 7 (eta)	Q99832
13676-46	13676-46_3	Human	3625	INHBB	inhibin, beta B	P09529
13680-3	13680-3_3	Human	4665	NAB2	NGFI-A binding protein 2 (EGR1 binding protein 2)	Q15742
13681-173	13681-173_3	Human	1459	CSNK2A2	casein kinase 2, alpha prime polypeptide	P19784
13682-47	13682-47_3	Human	1436	CSF1R	colony stimulating factor 1 receptor	P07333
13683-18	13683-18_3	Human	1188	CLCNKB	chloride channel Kb	P51801
13686-2	13686-2_3	Human	3568	IL5RA	interleukin 5 receptor, alpha	Q01344
13688-2	13688-2_3	Human	133690	CAPSL	calcyphosine-like	Q8WWF8
13689-2	13689-2_3	Human	4953	ODC1	ornithine decarboxylase 1	P11926
13691-10	13691-10_3	Human	160728	SLC5A8	solute carrier family 5 (iodide transporter), member 8	Q8N695
13692-154	13692-154_3	Human	8840	WISP1	WNT1 inducible signaling pathway protein 1	O95388
13694-24	13694-24_3	Human	64109	CRLF2	cytokine receptor-like factor 2	Q9HC73
13697-51	13697-51_3	Human	2819	GPD1	glycerol-3-phosphate dehydrogenase 1 (soluble)	P21695
13698-28	13698-28_3	Human	79932	KIAA0319L	KIAA0319-like	Q8IZA0
13700-10	13700-10_3	Human	302	ANXA2	annexin A2	P07355
13704-5	13704-5_3	Human	3158	HMGCS2	3-hydroxy-3-methylglutaryl-CoA synthase 2 (mitochondrial)	P54868
13711-10	13711-10_3	Human	1213	CLTC	clathrin, heavy chain (Hc)	Q00610
13713-164	13713-164_3	Human	26984	SEC22A	SEC22 vesicle trafficking protein homolog A (S. cerevisiae)	Q96IW7
13717-15	13717-15_3	Human	2220	FCN2	ficolin (collagen/fibrinogen domain containing lectin) 2 (hucolin)	Q15485
13719-19	13719-19_3	Human	10298	PAK4	p21 protein (Cdc42/Rac)-activated kinase 4	O96013
13720-95	13720-95_3	Human	5657	PRTN3	proteinase 3	P24158
13724-27	13724-27_3	Human	9965	FGF19	fibroblast growth factor 19	O95750
13726-4	13726-4_3	Human	941	CD80	CD80 molecule	P33681
13727-44	13727-44_3	Human	8405	SPOP	speckle-type POZ protein	O43791
13728-19	13728-19_3	Human	10961	ERP29	endoplasmic reticulum protein 29	P30040
13729-26	13729-26_3	Human	94097	SFXN5	sideroflexin 5	Q8TD22
13733-5	13733-5_3	Human	3593	IL12B	interleukin 12B (natural killer cell stimulatory factor 2, cytotoxic lymphocyte maturation factor 2, p40)	P29460
13735-1	13735-1_3	Human	5909	RAP1GAP	RAP1 GTPase activating protein	P47736
13738-8	13738-8_3	Human	3624	INHBA	inhibin, beta A	P08476
13740-51	13740-51_3	Human	2487	FRZB	frizzled-related protein	Q92765
13743-56	13743-56_3	Human	8450	CUL4B	cullin 4B	Q13620
13744-37	13744-37_3	Human	3563	IL3RA	interleukin 3 receptor, alpha (low affinity)	P26951
13745-10	13745-10_3	Human	5311	PKD2	polycystic kidney disease 2 (autosomal dominant)	Q13563
13748-4	13748-4_3	Human	6355	CCL8	chemokine (C-C motif) ligand 8	P80075
13926-1	13926-1_3	Human	80010	RMI1	RMI1, RecQ mediated genome instability 1, homolog (S. cerevisiae)	Q9H9A7
13929-27	13929-27_3	Human	54677	CROT	carnitine O-octanoyltransferase	Q9UKG9
13930-3	13930-3_3	Human	60489	APOBEC3G	apolipoprotein B mRNA editing enzyme, catalytic polypeptide-like 3G	Q9HC16
13931-22	13931-22_3	Human	5715	PSMD9	proteasome (prosome, macropain) 26S subunit, non-ATPase, 9	O00233
13932-45	13932-45_3	Human	8874	ARHGEF7	Rho guanine nucleotide exchange factor (GEF) 7	Q14155
13933-276	13933-276_3	Human	4664	NAB1	NGFI-A binding protein 1 (EGR1 binding protein 1)	Q13506
13934-3	13934-3_3	Human	23263	MCF2L	MCF.2 cell line derived transforming sequence-like	O15068
13936-24	13936-24_3	Human	5232	PGK2	phosphoglycerate kinase 2	P07205
13937-75	13937-75_3	Human	55832	CAND1	cullin-associated and neddylation-dissociated 1	Q86VP6
13939-14	13939-14_3	Human	7360	UGP2	UDP-glucose pyrophosphorylase 2	Q16851
13940-19	13940-19_3	Human	3428	IFI16	interferon, gamma-inducible protein 16	Q16666
13941-82	13941-82_3	Human	10667	FARS2	phenylalanyl-tRNA synthetase 2, mitochondrial	O95363
13942-140	13942-140_3	Human	80176	SPSB1	splA/ryanodine receptor domain and SOCS box containing 1	Q96BD6
13943-38	13943-38_3	Human	84661	DPY30	dpy-30 homolog (C. elegans)	Q9C005
13944-3	13944-3_3	Human	6818	SULT1A3	sulfotransferase family, cytosolic, 1A, phenol-preferring, member 3	P0DMM9
13946-8	13946-8_3	Human	9416	DDX23	DEAD (Asp-Glu-Ala-Asp) box polypeptide 23	Q9BUQ8
13947-371	13947-371_3	Human	83594	NUDT12	nudix (nucleoside diphosphate linked moiety X)-type motif 12	Q9BQG2
13948-50	13948-50_3	Human	9568	GABBR2	gamma-aminobutyric acid (GABA) B receptor, 2	O75899
13950-9	13950-9_3	Human	10087	COL4A3BP	collagen, type IV, alpha 3 (Goodpasture antigen) binding protein	Q9Y5P4
13954-9	13954-9_3	Human	64841	GNPNAT1	glucosamine-phosphate N-acetyltransferase 1	Q96EK6
13955-33	13955-33_3	Human	1612	DAPK1	death-associated protein kinase 1	P53355
13958-5	13958-5_3	Human	166863	RBM46	RNA binding motif protein 46	Q8TBY0
13959-7	13959-7_3	Human	51056	LAP3	leucine aminopeptidase 3	P28838
13960-15	13960-15_3	Human	116988	AGAP3	ArfGAP with GTPase domain, ankyrin repeat and PH domain 3	Q96P47
13961-18	13961-18_3	Human	11127	KIF3A	kinesin family member 3A	Q9Y496
13963-7	13963-7_3	Human	54472	TOLLIP	toll interacting protein	Q9H0E2
13966-30	13966-30_3	Human	127294	MYOM3	myomesin family, member 3	Q5VTT5
13967-14	13967-14_3	Human	7296	TXNRD1	thioredoxin reductase 1	Q16881
13969-24	13969-24_3	Human	23633	KPNA6	karyopherin alpha 6 (importin alpha 7)	O60684
13972-4	13972-4_3	Human	51171	HSD17B14	hydroxysteroid (17-beta) dehydrogenase 14	Q9BPX1
13973-62	13973-62_3	Human	150465	TTL	tubulin tyrosine ligase	Q8NG68
13975-56	13975-56_3	Human	8500	PPFIA1	protein tyrosine phosphatase, receptor type, f polypeptide (PTPRF), interacting protein (liprin), alpha 1	Q13136
13976-9	13976-9_3	Human	9138	ARHGEF1	Rho guanine nucleotide exchange factor (GEF) 1	Q92888
13977-28	13977-28_3	Human	580	BARD1	BRCA1 associated RING domain 1	Q99728
13978-122	13978-122_3	Human	6926	TBX3	T-box 3	O15119
13979-3	13979-3_3	Human	115111	SLC26A7	solute carrier family 26, member 7	Q8TE54
13982-33	13982-33_3	Human	64407	RGS18	regulator of G-protein signaling 18	Q9NS28
13983-27	13983-27_3	Human	1429	CRYZ	crystallin, zeta (quinone reductase)	Q08257
13984-23	13984-23_3	Human	29118	DDX25	DEAD (Asp-Glu-Ala-Asp) box polypeptide 25	Q9UHL0
13985-12	13985-12_3	Human	64750	SMURF2	SMAD specific E3 ubiquitin protein ligase 2	Q9HAU4
13986-6	13986-6_3	Human	10314	LANCL1	LanC lantibiotic synthetase component C-like 1 (bacterial)	O43813
13988-67	13988-67_3	Human	57407	NMRAL1	NmrA-like family domain containing 1	Q9HBL8
13990-1	13990-1_3	Human	5091	PC	pyruvate carboxylase	P11498
13991-47	13991-47_3	Human	8672	EIF4G3	eukaryotic translation initiation factor 4 gamma, 3	O43432
13992-12	13992-12_3	Human	4905	NSF	N-ethylmaleimide-sensitive factor	P46459
13993-20	13993-20_3	Human	2036	EPB41L1	erythrocyte membrane protein band 4.1-like 1	Q9H4G0
13994-1	13994-1_3	Human	2091	FBL	fibrillarin	P22087
13996-16	13996-16_3	Human	60490	PPCDC	phosphopantothenoylcysteine decarboxylase	Q96CD2
13998-26	13998-26_3	Human	122622	ADSSL1	adenylosuccinate synthase like 1	Q8N142
14002-18	14002-18_3	Human	23348	DOCK9	dedicator of cytokinesis 9	Q9BZ29
14005-2	14005-2_3	Human	55636	CHD7	chromodomain helicase DNA binding protein 7	Q9P2D1
14006-36	14006-36_3	Human	27232	GNMT	glycine N-methyltransferase	Q14749
14007-22	14007-22_3	Human	9061	PAPSS1	3'-phosphoadenosine 5'-phosphosulfate synthase 1	O43252
14008-22	14008-22_3	Human	55802	DCP1A	DCP1 decapping enzyme homolog A (S. cerevisiae)	Q9NPI6
14009-65	14009-65_3	Human	7128	TNFAIP3	tumor necrosis factor, alpha-induced protein 3	P21580
14011-17	14011-17_3	Human	6282	S100A11	S100 calcium binding protein A11	P31949
14012-17	14012-17_3	Human	79132	DHX58	DEXH (Asp-Glu-X-His) box polypeptide 58	Q96C10
14013-11	14013-11_3	Human	10010	TANK	TRAF family member-associated NFKB activator	Q92844
14019-73	14019-73_3	Human	2125	EVPL	envoplakin	Q92817
14021-81	14021-81_3	Human	29079	MED4	mediator complex subunit 4	Q9NPJ6
14024-196	14024-196_3	Human	1896	EDA	ectodysplasin A	Q92838
14025-18	14025-18_3	Human	3604	TNFRSF9	tumor necrosis factor receptor superfamily, member 9	Q07011
14026-24	14026-24_3	Human	112744	IL17F	interleukin 17F	Q96PD4
14028-22	14028-22_3	Human	5286	PIK3C2A	phosphoinositide-3-kinase, class 2, alpha polypeptide	O00443
14029-42	14029-42_3	Human	9318	COPS2	COP9 constitutive photomorphogenic homolog subunit 2 (Arabidopsis)	P61201
14034-22	14034-22_3	Human	4070	TACSTD2	tumor-associated calcium signal transducer 2	P09758
14035-13	14035-13_3	Human	7074	TIAM1	T-cell lymphoma invasion and metastasis 1	Q13009
14036-116	14036-116_3	Human	8777	MPDZ	multiple PDZ domain protein	O75970
14037-18	14037-18_3	Human	8498	RANBP3	RAN binding protein 3	Q9H6Z4
14039-33	14039-33_3	Human	25818	KLK5	kallikrein-related peptidase 5	Q9Y337
14043-12	14043-12_3	Human	8411	EEA1	early endosome antigen 1	Q15075
14045-12	14045-12_3	Human	10499	NCOA2	nuclear receptor coactivator 2	Q15596
14047-78	14047-78_3	Human	627	BDNF	brain-derived neurotrophic factor	P23560
14048-7	14048-7_3	Human	3556	IL1RAP	interleukin 1 receptor accessory protein	Q9NPH3
14051-54	14051-54_3	Human	2303	FOXC2	forkhead box C2 (MFH-1, mesenchyme forkhead 1)	Q99958
14052-26	14052-26_3	Human	23025	UNC13A	unc-13 homolog A (C. elegans)	Q9UPW8
14054-17	14054-17_3	Human	3601	IL15RA	interleukin 15 receptor, alpha	Q13261
14056-4	14056-4_3	Human	1081	CGA	glycoprotein hormones, alpha polypeptide	P01215
14060-67	14060-67_3	Human	4689	NCF4	neutrophil cytosolic factor 4, 40kDa	Q15080
14061-48	14061-48_3	Human	8600	TNFSF11	tumor necrosis factor (ligand) superfamily, member 11	O14788
14063-17	14063-17_3	Human	5008	OSM	oncostatin M	P13725
14065-11	14065-11_3	Human	921	CD5	CD5 molecule	P06127
14066-49	14066-49_3	Human	9863	MAGI2	membrane associated guanylate kinase, WW and PDZ domain containing 2	Q86UL8
14067-6	14067-6_3	Human	5318	PKP2	plakophilin 2	Q99959
14069-61	14069-61_3	Human	762	CA4	carbonic anhydrase IV	P22748
14070-56	14070-56_3	Human	6453	ITSN1	intersectin 1 (SH3 domain protein)	Q15811
14074-2	14074-2_3	Human	25759	SHC2	SHC (Src homology 2 domain containing) transforming protein 2	P98077
14076-74	14076-74_3	Human	1472	CST4	cystatin S	P01036
14079-14	14079-14_3	Human	8809	IL18R1	interleukin 18 receptor 1	Q13478
14082-56	14082-56_3	Human	83660	TLN2	talin 2	Q9Y4G6
14083-25	14083-25_3	Human	22929	SEPHS1	selenophosphate synthetase 1	P49903
14088-38	14088-38_3	Human	3489	IGFBP6	insulin-like growth factor binding protein 6	P24592
14090-23	14090-23_3	Human	50619	DEF6	differentially expressed in FDCP 6 homolog (mouse)	Q9H4E7
14091-42	14091-42_3	Human	874	CBR3	carbonyl reductase 3	O75828
14093-10	14093-10_3	Human	2323	FLT3LG	fms-related tyrosine kinase 3 ligand	P49771
14094-29	14094-29_3	Human	1839	HBEGF	heparin-binding EGF-like growth factor	Q99075
14095-1	14095-1_3	Human	22914	KLRK1	killer cell lectin-like receptor subfamily K, member 1	P26718
14098-28	14098-28_3	Human	833	CARS	cysteinyl-tRNA synthetase	P49589
14099-20	14099-20_3	Human	5685	PSMA4	proteasome (prosome, macropain) subunit, alpha type, 4	P25789
14100-63	14100-63_3	Human	714	C1QC	complement component 1, q subcomponent, C chain	P02747
14101-2	14101-2_3	Human	1271	CNTFR	ciliary neurotrophic factor receptor	P26992
14106-46	14106-46_3	Human	5910	RAP1GDS1	RAP1, GTP-GDP dissociation stimulator 1	P52306
14107-1	14107-1_3	Human	10588	MTHFS	5,10-methenyltetrahydrofolate synthetase (5-formyltetrahydrofolate cyclo-ligase)	P49914
14111-15	14111-15_3	Human	7058	THBS2	thrombospondin 2	P35442
14112-40	14112-40_3	Human	84957	RELT	RELT tumor necrosis factor receptor	Q969Z4
14114-18	14114-18_3	Human	196500	PIANP	chromosome 12 open reading frame 53	Q8IYJ0
14115-34	14115-34_3	Human	133	ADM	adrenomedullin	P35318
14116-129	14116-129_3	Human	6275	S100A4	S100 calcium binding protein A4	P26447
14120-2	14120-2_3	Human	54894	RNF43	ring finger protein 43	Q68DV7
14121-24	14121-24_3	Human	8793	TNFRSF10D	tumor necrosis factor receptor superfamily, member 10d, decoy with truncated death domain	Q9UBN6
14122-132	14122-132_3	Human	84133	ZNRF3	zinc and ring finger 3	Q9ULT6
14123-34	14123-34_3	Human	64115	C10orf54	chromosome 10 open reading frame 54	Q9H7M9
14124-6	14124-6_3	Human	1943	EFNA2	ephrin-A2	O43921
14127-240	14127-240_3	Human	3456	IFNB1	interferon, beta 1, fibroblast	P01574
14128-121	14128-121_3	Human	3446	IFNA10	interferon, alpha 10	P01566
14129-1	14129-1_3	Human	3444	IFNA7	interferon, alpha 7	P01567
14131-37	14131-37_3	Human	1948	EFNB2	ephrin-B2	P52799
14132-21	14132-21_3	Human	11148	HHLA2	HERV-H LTR-associating 2	Q9UM44
14133-93	14133-93_3	Human	7850	IL1R2	interleukin 1 receptor, type II	P27930
14134-49	14134-49_3	Human	347902	AMIGO2	adhesion molecule with Ig-like domain 2	Q86SJ2
14135-3	14135-3_3	Human	59350	RXFP1	relaxin/insulin-like family peptide receptor 1	Q9HBX9
14136-234	14136-234_3	Human	22918	CD93	CD93 molecule	Q9NPY3
14139-16	14139-16_3	Human	145957	NRG4	neuregulin 4	Q8WWG1
14143-8	14143-8_3	Human	8349	HIST2H2BE	histone cluster 2, H2be	Q16778
14144-3	14144-3_3	Human	92815	HIST3H2A	histone cluster 3, H2a	Q7L7L0
14146-92	14146-92_3	Human	8350	HIST1H3A	histone cluster 1, H3a	P68431
14149-9	14149-9_3	Human	27177	IL36B	interleukin 36, beta	Q9NZH7
14150-7	14150-7_3	Human	27179	IL36A	interleukin 36, alpha	Q9UHA7
14151-4	14151-4_3	Human	9636	ISG15	ISG15 ubiquitin-like modifier	P05161
14153-8	14153-8_3	Human	1944	EFNA3	ephrin-A3	P52797
14156-33	14156-33_3	Human	7529	YWHAB	tyrosine 3-monooxygenase/tryptophan 5-monooxygenase activation protein, beta polypeptide	P31946
14157-21	14157-21_3	Human	7531	YWHAE	tyrosine 3-monooxygenase/tryptophan 5-monooxygenase activation protein, epsilon polypeptide	P62258
14158-17	14158-17_3	Human	308	ANXA5	annexin A5	P08758
14175-78	14175-78_3	Human	140856	SCP2D1	chromosome 20 open reading frame 79	Q9UJQ7
14178-18	14178-18_3	Human	1033	CDKN3	cyclin-dependent kinase inhibitor 3	Q16667
14186-13	14186-13_3	Human	117584	RFFL	ring finger and FYVE-like domain containing 1	Q8WZ73
14192-31	14192-31_3	Human	132954	PDCL2	phosducin-like 2	Q8N4E4
14197-2	14197-2_3	Human	639	PRDM1	PR domain containing 1, with ZNF domain	O75626
14203-3	14203-3_3	Human	310	ANXA7	annexin A7	P20073
14204-55	14204-55_3	Human	55810	FOXJ2	forkhead box J2	Q9P0K8
14205-6	14205-6_3	Human	124790	HEXIM2	hexamethylene bis-acetamide inducible 2	Q96MH2
14206-28	14206-28_3	Human	322	APBB1	amyloid beta (A4) precursor protein-binding, family B, member 1 (Fe65)	O00213
14208-3	14208-3_3	Human	116362	RBP7	retinol binding protein 7, cellular	Q96R05
14216-35	14216-35_3	Human	9879	DDX46	DEAD (Asp-Glu-Ala-Asp) box polypeptide 46	Q7L014
14226-120	14226-120_3	Human	23743	BHMT2	betaine--homocysteine S-methyltransferase 2	Q9H2M3
14227-21	14227-21_3	Human	140465	MYL6B	myosin, light chain 6B, alkali, smooth muscle and non-muscle	P14649
14229-5	14229-5_3	Human	27304	MOCS3	molybdenum cofactor synthesis 3	O95396
14245-195	14245-195_3	Human	51375	SNX7	sorting nexin 7	Q9UNH6
14246-50	14246-50_3	Human	9046	DOK2	docking protein 2, 56kDa	O60496
14249-68	14249-68_3	Human	11043	MID2	midline 2	Q9UJV3
14250-115	14250-115_3	Human	642	BLMH	bleomycin hydrolase	Q13867
14254-27	14254-27_3	Human	5775	PTPN4	protein tyrosine phosphatase, non-receptor type 4 (megakaryocyte)	P29074
14260-112	14260-112_3	Human	10276	NET1	neuroepithelial cell transforming 1	Q7Z628
14268-4	14268-4_3	Human	140809	SRXN1	sulfiredoxin 1	Q9BYN0
14271-23	14271-23_3	Human	51560	RAB6B	RAB6B, member RAS oncogene family	Q9NRW1
14273-19	14273-19_3	Human	5550	PREP	prolyl endopeptidase	P48147
14283-12	14283-12_3	Human	51552	RAB14	RAB14, member RAS oncogene family	P61106
14284-23	14284-23_3	Human	440275	EIF2AK4	eukaryotic translation initiation factor 2 alpha kinase 4	Q9P2K8
14286-2	14286-2_3	Human	4772	NFATC1	nuclear factor of activated T-cells, cytoplasmic, calcineurin-dependent 1	O95644
14287-6	14287-6_3	Human	5878	RAB5C	RAB5C, member RAS oncogene family	P51148
14291-53	14291-53_3	Human	116986	AGAP2	ArfGAP with GTPase domain, ankyrin repeat and PH domain 2	Q99490
14294-61	14294-61_3	Human	4152	MBD1	methyl-CpG binding domain protein 1	Q9UIS9
14309-8	14309-8_3	Human	3187	HNRNPH1	heterogeneous nuclear ribonucleoprotein H1 (H)	P31943
14314-6	14314-6_3	Human	23759	PPIL2	peptidylprolyl isomerase (cyclophilin)-like 2	Q13356
14318-1	14318-1_3	Human	51699	VPS29	vacuolar protein sorting 29 homolog (S. cerevisiae)	Q9UBQ0
14324-52	14324-52_3	Human	9126	SMC3	structural maintenance of chromosomes 3	Q9UQE7
14326-4	14326-4_3	Human	7324	UBE2E1	ubiquitin-conjugating enzyme E2E 1	P51965
14329-4	14329-4_3	Human	11083	DIDO1	death inducer-obliterator 1	Q9BTC0
14331-262	14331-262_3	Human	6993	DYNLT1	dynein, light chain, Tctex-type 1	P63172
14332-3	14332-3_3	Human	5898	RALA	v-ral simian leukemia viral oncogene homolog A (ras related)	P11233
14334-3	14334-3_3	Human	5957	RCVRN	recoverin	P35243
14337-1	14337-1_3	Human	27095	TRAPPC3	trafficking protein particle complex 3	O43617
14341-8	14341-8_3	Human	125704	FAM69C	family with sequence similarity 69, member C	Q0P6D2
14583-49	14583-49_3	Human	2660	MSTN	myostatin	O14793
14587-16	14587-16_3	Human	10220	GDF11	growth differentiation factor 11	O95390
14593-152	14593-152_3	Human	125228	FAM210A	chromosome 18 open reading frame 19	Q96ND0
14597-5	14597-5_3	Human	10500	SEMA6C	sema domain, transmembrane domain (TM), and cytoplasmic domain, (semaphorin) 6C	Q9H3T2
14599-18	14599-18_3	Human	23166	STAB1	stabilin 1	Q9NY15
14603-51	14603-51_3	Human	9674	KIAA0040	KIAA0040	J3QR46
14614-41	14614-41_3	Human	400746	NCMAP	chromosome 1 open reading frame 130	Q5T1S8
14615-46	14615-46_3	Human	85294	KRTAP2-4	keratin associated protein 2-4	Q9BYR9
14616-16	14616-16_3	Human	84911	ZNF382	zinc finger protein 382	Q96SR6
14618-26	14618-26_3	Human	81552	VOPP1	vesicular, overexpressed in cancer, prosurvival protein 1	Q96AW1
14619-8	14619-8_3	Human	116115	ZNF526	zinc finger protein 526	Q8TF50
14623-26	14623-26_3	Human	6612	SUMO3	SMT3 suppressor of mif two 3 homolog 3 (S. cerevisiae)	P55854
14624-51	14624-51_3	Human	10664	CTCF	CCCTC-binding factor (zinc finger protein)	P49711
14628-72	14628-72_3	Human	26273	FBXO3	F-box protein 3	Q9UK99
14631-22	14631-22_3	Human	80824	DUSP16	dual specificity phosphatase 16	Q9BY84
14633-26	14633-26_3	Human	84548	TMEM185A	transmembrane protein 185A	Q8NFB2
14634-13	14634-13_3	Human	3973	LHCGR	luteinizing hormone/choriogonadotropin receptor	P22888
14636-25	14636-25_3	Human	10247	RIDA	heat-responsive protein 12	P52758
14645-253	14645-253_3	Human	2941	GSTA4	glutathione S-transferase alpha 4	O15217
14655-1	14655-1_3	Human	55192	DNAJC17	DnaJ (Hsp40) homolog, subfamily C, member 17	Q9NVM6
14662-6	14662-6_3	Human	7593	MZF1	myeloid zinc finger 1	P28698
14663-44	14663-44_3	Human	9025	RNF8	ring finger protein 8	O76064
14670-1	14670-1_3	Human	6498	SKIL	SKI-like oncogene	P12757
14674-63	14674-63_3	Human	29763	PACSIN3	protein kinase C and casein kinase substrate in neurons 3	Q9UKS6
14675-20	14675-20_3	Human	1975	EIF4B	eukaryotic translation initiation factor 4B	P23588
14684-17	14684-17_3	Human	824	CAPN2	calpain 2, (m/II) large subunit	P17655
14685-17	14685-17_3	Human	208	AKT2	v-akt murine thymoma viral oncogene homolog 2	P31751
14687-6	14687-6_3	Human	10226	PLIN3	perilipin 3	O60664
14688-6	14688-6_3	Human	5778	PTPN7	protein tyrosine phosphatase, non-receptor type 7	P35236
14689-3	14689-3_3	Human	6396	SEC13	SEC13 homolog (S. cerevisiae)	P55735
14692-3	14692-3_3	Human	92822	ZNF276	zinc finger protein 276	Q8N554
14705-1	14705-1_3	Human	2277	VEGFD	c-fos induced growth factor (vascular endothelial growth factor D)	O43915
14708-59	14708-59_3	Human	733	C8G	complement component 8, gamma polypeptide	P07360
14711-27	14711-27_3	Human	1474	CST6	cystatin E/M	Q15828
14713-46	14713-46_3	Human	566	AZU1	azurocidin 1	P20160
14747-9	14747-9_3	Human	9244	CRLF1	cytokine receptor-like factor 1	O75462
14748-31	14748-31_3	Human	394	ARHGAP5	Rho GTPase activating protein 5	Q13017
2182-54	2182-54_1	Human	720	C4A	complement component 4A (Rodgers blood group)	P0C0L4|P0C0L5
2182-54	2182-54_1	Human	721	C4B	complement component 4B (Chido blood group)	P0C0L4|P0C0L5
2190-55	2190-55_1	Human	2160	F11	coagulation factor XI	P03951
2192-63	2192-63_10	Human	10850	CCL27	chemokine (C-C motif) ligand 27	Q9Y4X3
2201-17	2201-17_6	Human	80781	COL18A1	collagen, type XVIII, alpha 1	P39060
2211-9	2211-9_6	Human	7076	TIMP1	TIMP metallopeptidase inhibitor 1	P01033
2212-69	2212-69_1	Human	5327	PLAT	plasminogen activator, tissue	P00750
2247-20	2247-20_11	Human	84432	PROK1	prokineticin 1	P58294
2278-61	2278-61_4	Human	7077	TIMP2	TIMP metallopeptidase inhibitor 2	P16035
2333-72	2333-72_1	Human	7040	TGFB1	transforming growth factor, beta 1	P01137
2381-52	2381-52_4	Human	727	C5	complement component 5	P01031
2418-55	2418-55_9	Human	348	APOE	apolipoprotein E	P02649
2421-7	2421-7_3	Human	627	BDNF	brain-derived neurotrophic factor	P23560
2429-27	2429-27_4	Human	731	C8A	complement component 8, alpha polypeptide	P07357|P07358|P07360
2429-27	2429-27_4	Human	732	C8B	complement component 8, beta polypeptide	P07357|P07358|P07360
2429-27	2429-27_4	Human	733	C8G	complement component 8, gamma polypeptide	P07357|P07358|P07360
2431-17	2431-17_3	Human	1511	CTSG	cathepsin G	P08311
2436-49	2436-49_4	Human	58191	CXCL16	chemokine (C-X-C motif) ligand 16	Q9H2A7
2441-2	2441-2_4	Human	2255	FGF10		O15520
2443-10	2443-10_4	Human	2253	FGF8	fibroblast growth factor 8 (androgen-induced)	P55075
2447-7	2447-7_4	Human	30814	PLA2G2E	phospholipase A2, group IIE	Q9NZK7
2449-1	2449-1_4	Human	5322	PLA2G5	phospholipase A2, group V	P39877
2468-62	2468-62_3	Human	6364	CCL20	chemokine (C-C motif) ligand 20	P78556
2474-54	2474-54_5	Human	325	APCS	amyloid P component, serum	P02743
2475-1	2475-1_3	Human	3815	KIT	v-kit Hardy-Zuckerman 4 feline sarcoma viral oncogene homolog	P10721
2480-58	2480-58_3	Human	7078	TIMP3	TIMP metallopeptidase inhibitor 3	P35625
2500-2	2500-2_3	Human	51378	ANGPT4	angiopoietin 4	Q9Y264
2505-49	2505-49_3	Human	2676	GFRA3	GDNF family receptor alpha 3	O60609
2514-65	2514-65_3	Human	1949	EFNB3	ephrin-B3	Q15768
2515-14	2515-14_3	Human	2675	GFRA2	GDNF family receptor alpha 2	O00451
2516-57	2516-57_3	Human	6366	CCL21	chemokine (C-C motif) ligand 21	O00585
2524-56	2524-56_3	Human	3146	HMGB1	high mobility group box 1	P09429
2558-51	2558-51_3	Human	5443	POMC	proopiomelanocortin	P01189
2567-5	2567-5_6	Human	3426	CFI	complement factor I	P05156
2571-12	2571-12_3	Human	3486	IGFBP3	insulin-like growth factor binding protein 3	P17936
2578-67	2578-67_2	Human	6347	CCL2	chemokine (C-C motif) ligand 2	P13500
2579-17	2579-17_5	Human	4318	MMP9	matrix metallopeptidase 9 (gelatinase B, 92kDa gelatinase, 92kDa type IV collagenase)	P14780
2580-83	2580-83_2	Human	4353	MPO		P05164
2585-2	2585-2_5	Human	5617	PRL	prolactin	P01236
2590-69	2590-69_4	Human	4919	ROR1	receptor tyrosine kinase-like orphan receptor 1	Q01973
2597-8	2597-8_3	Human	7422	VEGFA	vascular endothelial growth factor A	P15692
2599-51	2599-51_2	Human	8744	TNFSF9	tumor necrosis factor (ligand) superfamily, member 9	P41273
2602-2	2602-2_2	Human	285	ANGPT2	angiopoietin 2	O15123
2605-49	2605-49_2	Human	943	TNFRSF8	tumor necrosis factor receptor superfamily, member 8	P28908
2607-54	2607-54_2	Human	23529	CLCF1	cardiotrophin-like cytokine factor 1	O75462|Q9UBD9
2607-54	2607-54_2	Human	9244	CRLF1	cytokine receptor-like factor 1	O75462|Q9UBD9
2609-59	2609-59_2	Human	1471	CST3	cystatin C	P01034
2611-72	2611-72_2	Human	7301	TYRO3	TYRO3 protein tyrosine kinase	Q06418
2612-5	2612-5_2	Human	1983	EIF5	eukaryotic translation initiation factor 5	P55010
2614-28	2614-28_2	Human	1945	EFNA4	ephrin-A4	P52798
2615-60	2615-60_2	Human	1946	EFNA5	ephrin-A5	P52803
2616-23	2616-23_18	Human	2064	ERBB2	v-erb-b2 erythroblastic leukemia viral oncogene homolog 2, neuro/glioblastoma derived oncogene homolog (avian)	P04626
2617-56	2617-56_35	Human	2065	ERBB3	v-erb-b2 erythroblastic leukemia viral oncogene homolog 3 (avian)	P21860
2618-10	2618-10_2	Human	2066	ERBB4	v-erb-a erythroblastic leukemia viral oncogene homolog 4 (avian)	Q15303
2619-72	2619-72_2	Human	4070	TACSTD2	tumor-associated calcium signal transducer 2	P09758
2620-4	2620-4_2	Human	3572	IL6ST	interleukin 6 signal transducer (gp130, oncostatin M receptor)	P40189
2622-18	2622-18_1	Human	3163	HMOX2	heme oxygenase (decycling) 2	P30519
2625-53	2625-53_4	Human	3320	HSP90AA1	heat shock protein 90kDa alpha (cytosolic), class A member 1	P07900|P08238
2625-53	2625-53_4	Human	3326	HSP90AB1	heat shock protein 90kDa alpha (cytosolic), class B member 1	P07900|P08238
2631-50	2631-50_2	Human	3588	IL10RB	interleukin 10 receptor, beta	Q08334
2632-5	2632-5_2	Human	3594	IL12RB1	interleukin 12 receptor, beta 1	P42701
2633-52	2633-52_2	Human	3597	IL13RA1	interleukin 13 receptor, alpha 1	P78552
2634-2	2634-2_2	Human	3561	IL2RG	interleukin 2 receptor, gamma	P31785
2635-61	2635-61_2	Human	143903	LAYN	layilin	Q6UX15
2636-10	2636-10_2	Human	4055	LTBR	lymphotoxin beta receptor (TNFR superfamily, member 3)	P36941
2637-77	2637-77_2	Human	4360	MRC1	mannose receptor, C type 1	P22897
2640-3	2640-3_2	Human	4486	MST1R	macrophage stimulating 1 receptor (c-met-related tyrosine kinase)	Q04912
2642-4	2642-4_1	Human	5049	PAFAH1B2	platelet-activating factor acetylhydrolase 1b, catalytic subunit 2 (30kDa)	P68402
2643-57	2643-57_2	Human	1001	CDH3	cadherin 3, type 1, P-cadherin (placental)	P22223
2644-11	2644-11_2	Human	5578	PRKCA	protein kinase C, alpha	P17252
2645-54	2645-54_1	Human	5590	PRKCZ	protein kinase C, zeta	Q05513
2647-66	2647-66_2	Human	2665	GDI2	GDP dissociation inhibitor 2	P50395
2649-77	2649-77_2	Human	3385	ICAM3	intercellular adhesion molecule 3	P32942
2652-15	2652-15_1	Human	5329	PLAUR	plasminogen activator, urokinase receptor	Q03405
2654-19	2654-19_1	Human	7132	TNFRSF1A	tumor necrosis factor receptor superfamily, member 1A	P19438
2658-27	2658-27_1	Human	4916	NTRK3	neurotrophic tyrosine kinase, receptor, type 3	Q16288
2665-26	2665-26_2	Human	608	TNFRSF17	tumor necrosis factor receptor superfamily, member 17	Q02223
2666-53	2666-53_2	Human	1634	DCN	decorin	P07585
2668-70	2668-70_2	Human	823	CAPN1	calpain 1, (mu/I) large subunit	P07384|P04632
2668-70	2668-70_2	Human	826	CAPNS1	calpain, small subunit 1	P07384|P04632
2677-1	2677-1_1	Human	1956	EGFR	epidermal growth factor receptor	P00533
2681-23	2681-23_2	Human	3082	HGF	hepatocyte growth factor (hepapoietin A	P14210
2682-68	2682-68_1	Human	3329	HSPD1	heat shock 60kDa protein 1 (chaperonin)	P10809
2683-1	2683-1_2	Human	718	C3	complement component 3	P01024
2687-2	2687-2_1	Human	8190	MIA	melanoma inhibitory activity	Q16674
2692-74	2692-74_2	Human	5320	PLA2G2A	phospholipase A2, group IIA (platelets, synovial fluid)	P14555
2693-20	2693-20_3	Human	5008	OSM	oncostatin M	P13725
2695-25	2695-25_1	Human	5175	PECAM1	platelet/endothelial cell adhesion molecule	P16284
2696-87	2696-87_2	Human	5623	PSPN	persephin	O60542
2697-7	2697-7_2	Human	5196	PF4	platelet factor 4	P02776
2700-56	2700-56_2	Human	5627	PROS1	protein S (alpha)	P07225
2704-74	2704-74_1	Human	23495	TNFRSF13B	tumor necrosis factor receptor superfamily, member 13B	O14836
2705-5	2705-5_2	Human	6370	CCL25	chemokine (C-C motif) ligand 25	O15444
2706-69	2706-69_2	Human	6906	SERPINA7	serpin peptidase inhibitor, clade A (alpha-1 antiproteinase, antitrypsin), member 7	P05543
2708-54	2708-54_2	Human	8995	TNFSF18	tumor necrosis factor (ligand) superfamily, member 18	Q9UNG2
2714-78	2714-78_2	Human	9255	AIMP1	aminoacyl tRNA synthetase complex-interacting multifunctional protein 1	Q12904
2719-3	2719-3_4	Human	1441	CSF3R	colony stimulating factor 3 receptor (granulocyte)	Q99062
2723-9	2723-9_2	Human	27178	IL37	interleukin 37	Q9NZH6
2730-58	2730-58_2	Human	100507436	MICA	MHC class I polypeptide-related sequence A	Q29983
2731-29	2731-29_2	Human	5447	POR	P450 (cytochrome) oxidoreductase	P16435
2732-58	2732-58_3	Human	79923	NANOG	Nanog homeobox	Q9H9S0
2734-49	2734-49_4	Human	9436	NCR2	natural cytotoxicity triggering receptor 2	O95944
2737-22	2737-22_2	Human	4856	NOV	nephroblastoma overexpressed gene	P48745
2741-22	2741-22_2	Human	946	SIGLEC6	sialic acid binding Ig-like lectin 6	O43699
2742-68	2742-68_2	Human	27036	SIGLEC7	sialic acid binding Ig-like lectin 7	Q9Y286
2743-5	2743-5_2	Human	6469	SHH	sonic hedgehog	Q15465
2744-57	2744-57_2	Human	3500	IGHG1	immunoglobulin heavy constant gamma 1 (G1m marker)	P01857
2744-57	2744-57_2	Human	3501	IGHG2	immunoglobulin heavy constant gamma 2 (G2m marker)	P01857
2744-57	2744-57_2	Human	3502	IGHG3	immunoglobulin heavy constant gamma 3 (G3m marker)	P01857
2744-57	2744-57_2	Human	3503	IGHG4	immunoglobulin heavy constant gamma 4 (G4m marker)	P01857
2744-57	2744-57_2	Human	3535	IGL	immunoglobulin lambda locus	P01857
2744-57	2744-57_2	Human	50802	IGK	immunoglobulin kappa locus	P01857
2747-3	2747-3_2	Human	79465	ULBP3	UL16 binding protein 3	Q9BZM4
2750-3	2750-3_2	Human	335	APOA1	apolipoprotein A-I	P02647
2752-62	2752-62_2	Human	8200	GDF5	growth differentiation factor 5	P43026
2753-2	2753-2_2	Human	712	C1QA	complement component 1, q subcomponent, A chain	P02745|P02746|P02747
2753-2	2753-2_2	Human	713	C1QB	complement component 1, q subcomponent, B chain	P02745|P02746|P02747
2753-2	2753-2_2	Human	714	C1QC	complement component 1, q subcomponent, C chain	P02745|P02746|P02747
2754-50	2754-50_2	Human	718	C3	complement component 3	P01024
2760-2	2760-2_2	Human	11170	FAM107A	family with sequence similarity 107, member A	O95990
2761-49	2761-49_2	Human	8817	FGF18	fibroblast growth factor 18	O76093
2763-66	2763-66_2	Human	26281	FGF20	fibroblast growth factor 20	Q9NP95
2765-4	2765-4_3	Human	10220	GDF11	growth differentiation factor 11	O95390|O14793
2770-51	2770-51_2	Human	6346	CCL1	chemokine (C-C motif) ligand 1	P22362
2771-35	2771-35_2	Human	3484	IGFBP1	insulin-like growth factor binding protein 1	P08833
2773-50	2773-50_2	Human	3586	IL10	interleukin 10	P22301
2774-10	2774-10_3	Human	3603	IL16	interleukin 16	Q14005
2778-10	2778-10_2	Human	50616	IL22	interleukin 22	Q9GZX6
2780-35	2780-35_2	Human	4057	LTF	lactotransferrin	P02788
2781-63	2781-63_2	Human	388372	CCL4L1	chemokine (C-C motif) ligand 4-like 2	Q8NHW4
2783-18	2783-18_2	Human	414062	CCL3L3	chemokine (C-C motif) ligand 3-like 3	P16619
2788-55	2788-55_1	Human	4314	MMP3	matrix metallopeptidase 3 (stromelysin 1, progelatinase)	P08254
2789-26	2789-26_2	Human	4316	MMP7	matrix metallopeptidase 7 (matrilysin, uterine)	P09237
2790-54	2790-54_2	Human	5473	PPBP	pro-platelet basic protein (chemokine (C-X-C motif) ligand 7)	P02775
2794-60	2794-60_2	Human	6647	SOD1	superoxide dismutase 1, soluble	P00441
2796-62	2796-62_2	Human	2243	FGA	fibrinogen alpha chain	P02671|P02675|P02679
2796-62	2796-62_2	Human	2244	FGB	fibrinogen beta chain	P02671|P02675|P02679
2796-62	2796-62_2	Human	2266	FGG	fibrinogen gamma chain	P02671|P02675|P02679
2797-56	2797-56_2	Human	338	APOB	apolipoprotein B (including Ag(x) antigen)	P04114
2805-6	2805-6_2	Human	59272	ACE2	angiotensin I converting enzyme (peptidyl-dipeptidase A) 2	Q9BYF1
2806-49	2806-49_2	Human	91	ACVR1B	activin A receptor, type IB	P36896
2809-25	2809-25_2	Human	9507	ADAMTS4	ADAM metallopeptidase with thrombospondin type 1 motif, 4	O75173
2811-27	2811-27_1	Human	284	ANGPT1	angiopoietin 1	Q15389
2813-11	2813-11_2	Human	181	AGRP	agouti related protein homolog (mouse)	O00253
2816-50	2816-50_2	Human	4059	BCAM	basal cell adhesion molecule (Lutheran blood group)	P50895
2819-23	2819-23_2	Human	1003	CDH5	cadherin 5, type 2 (vascular endothelium)	P33151
2823-7	2823-7_1	Human	149951	COMMD7	COMM domain containing 7	Q86VX2
2826-53	2826-53_2	Human	1896	EDA	ectodysplasin A	Q92838
2827-23	2827-23_2	Human	6376	CX3CL1	chemokine (C-X3-C motif) ligand 1	P78423
2828-82	2828-82_2	Human	6692	SPINT1	serine peptidase inhibitor, Kunitz type 1	O43278
2829-19	2829-19_2	Human	10148	EBI3	Epstein-Barr virus induced 3	Q8NEV9|Q14213
2829-19	2829-19_2	Human	246778	IL27	interleukin 27	Q8NEV9|Q14213
2831-29	2831-29_1	Human	11012	KLK11	kallikrein-related peptidase 11	Q9UBX7
2833-20	2833-20_1	Human	9622	KLK4	kallikrein-related peptidase 4	Q9Y5K2
2834-54	2834-54_1	Human	11202	KLK8	kallikrein-related peptidase 8	O60259
2835-1	2835-1_4	Human	2547	XRCC6	X-ray repair complementing defective repair in Chinese hamster cells 6	P12956
2836-68	2836-68_2	Human	3934	LCN2	lipocalin 2	P80188
2837-3	2837-3_2	Human	4233	MET	met proto-oncogene (hepatocyte growth factor receptor)	P08581
2838-53	2838-53_1	Human	4326	MMP17	matrix metallopeptidase 17 (membrane-inserted)	Q9ULZ9
2839-2	2839-2_1	Human	7292	TNFSF4	tumor necrosis factor (ligand) superfamily, member 4	P23510
2843-13	2843-13_2	Human	10653	SPINT2	serine peptidase inhibitor, Kunitz type, 2	O43291
2844-53	2844-53_2	Human	7075	TIE1	tyrosine kinase with immunoglobulin-like and EGF-like domains 1	P35590
2846-24	2846-24_2	Human	6233	RPS27A	ribosomal protein S27a	P62979
2849-49	2849-49_1	Human	199	AIF1	allograft inflammatory factor 1	P55008
2851-63	2851-63_3	Human	727	C5	complement component 5	P01031
2853-68	2853-68_2	Human	1111	CHEK1	CHK1 checkpoint homolog (S. pombe)	O14757
2855-49	2855-49_2	Human	5595	MAPK3	mitogen-activated protein kinase 3	P27361
2859-69	2859-69_2	Human	55869	HDAC8	histone deacetylase 8	Q9BY41
2860-19	2860-19_2	Human	3838	KPNA2	karyopherin alpha 2 (RAG cohort 1, importin alpha 1)	P52292
2864-2	2864-2_3	Human	5604	MAP2K1	mitogen-activated protein kinase kinase 1	Q02750
2870-29	2870-29_2	Human	5879	RAC1	ras-related C3 botulinum toxin substrate 1 (rho family, small GTP binding protein Rac1)	P63000
2871-73	2871-73_2	Human	5888	RAD51	RAD51 homolog (S. cerevisiae)	Q06609
2875-15	2875-15_2	Human	6908	TBP	TATA box binding protein	P20226
2876-74	2876-74_2	Human	7150	TOP1	topoisomerase (DNA) I	P11387
2877-3	2877-3_1	Human	7329	UBE2I	ubiquitin-conjugating enzyme E2I	P63279
2878-66	2878-66_2	Human	7525	YES1	v-yes-1 Yamaguchi sarcoma viral oncogene homolog 1	P07947
2879-9	2879-9_2	Human	12	SERPINA3	serpin peptidase inhibitor, clade A (alpha-1 antiproteinase, antitrypsin), member 3	P01011
2888-49	2888-49_2	Human	730	C7	complement component 7	P10643
2889-37	2889-37_2	Human	1489	CTF1	cardiotrophin 1	Q16619
2890-59	2890-59_2	Human	56477	CCL28	chemokine (C-C motif) ligand 28	Q9NRJ3
2900-53	2900-53_3	Human	6358	CCL14	chemokine (C-C motif) ligand 14	Q16627
2906-55	2906-55_3	Human	3565	IL4	interleukin 4	P05112
2911-27	2911-27_2	Human	4192	MDK	midkine (neurite growth-promoting factor 2)	P21741
2913-1	2913-1_2	Human	6368	CCL23	chemokine (C-C motif) ligand 23	P55773
2925-9	2925-9_1	Human	5054	SERPINE1	serpin peptidase inhibitor, clade E (nexin, plasminogen activator inhibitor type 1), member 1	P05121
2939-10	2939-10_2	Human	9048	ARTN	artemin	Q5T4W7
2942-50	2942-50_2	Human	54205	CYCS	cytochrome c, somatic	P99999
2943-5	2943-5_2	Human	1576	CYP3A4	cytochrome P450, family 3, subfamily A, polypeptide 4	P08684
2944-66	2944-66_2	Human	4681	NBL1	neuroblastoma, suppression of tumorigenicity 1	P41271
2946-52	2946-52_2	Human	1675	CFD	complement factor D (adipsin)	P00746
2948-58	2948-58_2	Human	2690	GHR	growth hormone receptor	P10912
2949-6	2949-6_2	Human	8399	PLA2G10	phospholipase A2, group X	O15496
2950-57	2950-57_2	Human	3487	IGFBP4	insulin-like growth factor binding protein 4	P22692
2952-75	2952-75_2	Human	3479	IGF1	insulin-like growth factor 1 (somatomedin C)	P05019
2953-31	2953-31_2	Human	1081	CGA	glycoprotein hormones, alpha polypeptide	P01215|P01229
2953-31	2953-31_2	Human	3972	LHB	luteinizing hormone beta polypeptide	P01215|P01229
2960-66	2960-66_2	Human	5199	CFP	complement factor properdin	P27918
2961-1	2961-1_2	Human	5624	PROC	protein C (inactivator of coagulation factors Va and VIIIa)	P04070
2962-50	2962-50_2	Human	5744	PTHLH	parathyroid hormone-like hormone	P12272
2966-65	2966-65_2	Human	6320	CLEC11A	C-type lectin domain family 11, member A	Q9Y240
2967-8	2967-8_1	Human	7412	VCAM1	vascular cell adhesion molecule 1	P19320
2968-61	2968-61_1	Human	9966	TNFSF15	tumor necrosis factor (ligand) superfamily, member 15	O95150
2970-60	2970-60_2	Human	374	AREG	amphiregulin	P15514
2972-57	2972-57_2	Human	655	BMP7	bone morphogenetic protein 7	P18075
2973-15	2973-15_2	Human	948	CD36	CD36 molecule (thrombospondin receptor)	P16671
2974-61	2974-61_2	Human	1272	CNTN1	contactin 1	Q12860
2975-19	2975-19_2	Human	1490	CTGF	connective tissue growth factor	P29279
2976-58	2976-58_2	Human	1828	DSG1	desmoglein 1	Q02413
2977-7	2977-7_2	Human	10913	EDAR	ectodysplasin A receptor	Q9UNE0
2979-8	2979-8_2	Human	6374	CXCL5	chemokine (C-X-C motif) ligand 5	P42830
2982-82	2982-82_2	Human	3960	LGALS4	lectin, galactoside-binding, soluble, 4	P56470
2985-35	2985-35_1	Human	2919	CXCL1	chemokine (C-X-C motif) ligand 1 (melanoma growth stimulating activity, alpha)	P09341
2987-37	2987-37_3	Human	3006	HIST1H1C	histone cluster 1, H1c	P16403
2991-9	2991-9_2	Human	3554	IL1R1	interleukin 1 receptor, type I	P14778
2992-59	2992-59_2	Human	23765	IL17RA	interleukin 17 receptor A	Q96F46
2993-1	2993-1_2	Human	8807	IL18RAP	interleukin 18 receptor accessory protein	O95256
2994-71	2994-71_2	Human	8808	IL1RL2	interleukin 1 receptor-like 2	Q9HB29
2997-8	2997-8_1	Human	58494	JAM2	junctional adhesion molecule 2	P57087
2998-53	2998-53_2	Human	83700	JAM3	junctional adhesion molecule 3	Q9BX67
2999-6	2999-6_2	Human	4045	LSAMP	limbic system-associated membrane protein	Q13449
3000-66	3000-66_1	Human	4153	MBL2	mannose-binding lectin (protein C) 2, soluble	P11226
3003-29	3003-29_2	Human	259197	NCR3	natural cytotoxicity triggering receptor 3	O14931
3004-67	3004-67_2	Human	80380	PDCD1LG2	programmed cell death 1 ligand 2	Q9BQ51
3005-5	3005-5_2	Human	5770	PTPN1	protein tyrosine phosphatase, non-receptor type 1	P18031
3007-7	3007-7_2	Human	27180	SIGLEC9	sialic acid binding Ig-like lectin 9	Q9Y336
3009-3	3009-3_2	Human	7049	TGFBR3	transforming growth factor, beta receptor III	Q03167
3010-53	3010-53_2	Human	85480	TSLP	thymic stromal lymphopoietin	Q969D9
3022-4	3022-4_2	Human	1493	CTLA4	cytotoxic T-lymphocyte-associated protein 4	P16410
3024-18	3024-18_2	Human	5345	SERPINF2	serpin peptidase inhibitor, clade F (alpha-2 antiplasmin, pigment epithelium derived factor), member 2	P08697
3025-50	3025-50_1	Human	2247	FGF2	fibroblast growth factor 2 (basic)	P09038
3026-5	3026-5_2	Human	831	CAST	calpastatin	P20810
3028-36	3028-36_2	Human	6368	CCL23	chemokine (C-C motif) ligand 23	P55773
3029-52	3029-52_2	Human	30835	CD209	CD209 molecule	Q9NNX6
3030-3	3030-3_2	Human	10332	CLEC4M	C-type lectin domain family 4, member M	Q9H2X3
3032-11	3032-11_2	Human	1081	CGA	glycoprotein hormones, alpha polypeptide	P01215|P01225
3032-11	3032-11_2	Human	2488	FSHB	follicle stimulating hormone, beta polypeptide	P01215|P01225
3033-57	3033-57_1	Human	3957	LGALS2	lectin, galactoside-binding, soluble, 2	P05162
3034-1	3034-1_2	Human	2670	GFAP	glial fibrillary acidic protein	P14136
3035-80	3035-80_2	Human	29949	IL19	interleukin 19	Q9UHD0
3037-62	3037-62_1	Human	3553	IL1B	interleukin 1, beta	P01584
3038-9	3038-9_2	Human	6373	CXCL11	chemokine (C-X-C motif) ligand 11	O14625
3040-59	3040-59_1	Human	6348	CCL3	chemokine (C-C motif) ligand 3	P10147
3041-55	3041-55_2	Human	9902	MRC2	mannose receptor, C type 2	Q9UBG0
3042-7	3042-7_2	Human	4151	MB	myoglobin	P02144
3043-49	3043-49_2	Human	6678	SPARC	secreted protein, acidic, cysteine-rich (osteonectin)	P09486
3044-3	3044-3_2	Human	6362	CCL18	chemokine (C-C motif) ligand 18 (pulmonary and activation-regulated)	P55774
3045-72	3045-72_2	Human	5764	PTN	pleiotrophin	P21246
3046-31	3046-31_1	Human	56729	RETN	resistin	Q9HD89
3049-61	3049-61_2	Human	5644	PRSS1	protease, serine, 1 (trypsin 1)	P07477
3050-7	3050-7_2	Human	7450	VWF	von Willebrand factor	P04275
3052-8	3052-8_2	Human	356	FASLG	Fas ligand (TNF superfamily, member 6)	P48023
3054-3	3054-3_2	Human	3240	HP	haptoglobin	P00738
3055-54	3055-54_2	Human	3566	IL4R	interleukin 4 receptor	P24394
3057-55	3057-55_1	Human	8840	WISP1	WNT1 inducible signaling pathway protein 1	O95388
3059-50	3059-50_2	Human	10673	TNFSF13B	tumor necrosis factor (ligand) superfamily, member 13b	Q9Y275
3060-43	3060-43_2	Human	735	C9	complement component 9	P02748
3065-65	3065-65_1	Human	2250	FGF5	fibroblast growth factor 5	P12034
3066-12	3066-12_1	Human	3958	LGALS3	lectin, galactoside-binding, soluble, 3	P17931
3067-67	3067-67_1	Human	2661	GDF9	growth differentiation factor 9	O60383
3069-52	3069-52_3	Human	3507	IGHM	immunoglobulin heavy constant mu	P01871
3069-52	3069-52_3	Human	3512	JCHAIN	immunoglobulin J polypeptide, linker protein for immunoglobulin alpha and mu polypeptides	P01871
3069-52	3069-52_3	Human	3535	IGL	immunoglobulin lambda locus	P01871
3069-52	3069-52_3	Human	50802	IGK	immunoglobulin kappa locus	P01871
3070-1	3070-1_2	Human	3558	IL2	interleukin 2	P60568
3072-4	3072-4_2	Human	3596	IL13	interleukin 13	P35225
3073-51	3073-51_2	Human	10068	IL18BP	interleukin 18 binding protein	O95998
3074-6	3074-6_2	Human	3929	LBP	lipopolysaccharide binding protein	P18428
3077-66	3077-66_2	Human	2159	F10	coagulation factor X	P00742
3078-1	3078-1_2	Human	5228	PGF	placental growth factor	P49763
3079-62	3079-62_2	Human	5919	RARRES2	retinoic acid receptor responder (tazarotene induced) 2	Q99969
3081-70	3081-70_2	Human	80329	ULBP1	UL16 binding protein 1	Q9BZM6
3082-9	3082-9_2	Human	80328	ULBP2	UL16 binding protein 2	Q9BZM5
3083-71	3083-71_1	Human	60401	EDA2R	ectodysplasin A2 receptor	Q9HAV5
3091-70	3091-70_2	Human	6790	AURKA	aurora kinase A	O14965
3115-64	3115-64_2	Human	5594	MAPK1	mitogen-activated protein kinase 1	P28482
3122-6	3122-6_2	Human	56616	DIABLO	diablo, IAP-binding mitochondrial protein	Q9NR28
3132-1	3132-1_1	Human	7424	VEGFC	vascular endothelial growth factor C	P49767
3143-3	3143-3_1	Human	920	CD4	CD4 molecule	P01730
3148-49	3148-49_1	Human	2920	CXCL2	chemokine (C-X-C motif) ligand 2	P19876|P19875
3148-49	3148-49_1	Human	2921	CXCL3	chemokine (C-X-C motif) ligand 3	P19876|P19875
3151-6	3151-6_1	Human	3559	IL2RA	interleukin 2 receptor, alpha	P01589
3152-57	3152-57_1	Human	7133	TNFRSF1B	tumor necrosis factor receptor superfamily, member 1B	P20333
3166-92	3166-92_1	Human	945	CD33	CD33 molecule	P20138
3168-8	3168-8_2	Human	11096	ADAMTS5	ADAM metallopeptidase with thrombospondin type 1 motif, 5	Q9UNA0
3169-70	3169-70_2	Human	3425	IDUA	iduronidase, alpha-L-	P35475
3170-6	3170-6_1	Human	10988	METAP2	methionyl aminopeptidase 2	P50579
3171-57	3171-57_2	Human	351	APP	amyloid beta (A4) precursor protein	P05067
3172-28	3172-28_2	Human	411	ARSB	arylsulfatase B	P15848
3173-49	3173-49_2	Human	27163	NAAA	N-acylethanolamine acid amidase	Q02083
3174-2	3174-2_1	Human	9510	ADAMTS1	ADAM metallopeptidase with thrombospondin type 1 motif, 1	Q9UHI8
3175-51	3175-51_5	Human	11093	ADAMTS13	ADAM metallopeptidase with thrombospondin type 1 motif, 13	Q76LX8
3178-5	3178-5_2	Human	1075	CTSC	cathepsin C	P53634
3179-51	3179-51_2	Human	5476	CTSA	cathepsin A	P10619
3181-50	3181-50_2	Human	1520	CTSS	cathepsin S	P25774
3182-38	3182-38_2	Human	953	ENTPD1	ectonucleoside triphosphate diphosphohydrolase 1	P49961
3184-25	3184-25_2	Human	2155	F7	coagulation factor VII (serum prothrombin conversion accelerator)	P08709
3186-2	3186-2_2	Human	717	C2	complement component 2	P06681
3187-52	3187-52_2	Human	10321	CRISP3	cysteine-rich secretory protein 3	P54108
3189-61	3189-61_2	Human	5651	TMPRSS15	transmembrane protease, serine 15	P98073
3191-50	3191-50_2	Human	117166	WFIKKN1	WAP, follistatin/kazal, immunoglobulin, kunitz and netrin domain containing 1	Q96NZ8
3192-3	3192-3_2	Human	55748	CNDP2	CNDP dipeptidase 2 (metallopeptidase M20 family)	Q96KP4
3194-36	3194-36_2	Human	51206	GP6	glycoprotein VI (platelet)	Q9HCN6
3195-50	3195-50_2	Human	10578	GNLY	granulysin	P22749
3196-6	3196-6_2	Human	1404	HAPLN1	hyaluronan and proteoglycan link protein 1	P10915
3197-70	3197-70_2	Human	3416	IDE	insulin-degrading enzyme	P14735
3198-4	3198-4_1	Human	3423	IDS	iduronate 2-sulfatase	P22304
3199-54	3199-54_2	Human	43849	KLK12	kallikrein-related peptidase 12	Q9UKR0
3201-49	3201-49_2	Human	25818	KLK5	kallikrein-related peptidase 5	Q9Y337
3202-28	3202-28_2	Human	79412	KREMEN2	kringle containing transmembrane protein 2	Q8NCW0
3204-2	3204-2_2	Human	4048	LTA4H	leukotriene A4 hydrolase	P09960
3206-4	3206-4_2	Human	10894	LYVE1	lymphatic vessel endothelial hyaluronan receptor 1	Q9Y5Y7
3209-69	3209-69_1	Human	56955	MEPE	matrix extracellular phosphoglycoprotein	Q9NQ76
3210-1	3210-1_2	Human	23173	METAP1	methionyl aminopeptidase 1	P53582
3212-30	3212-30_3	Human	56624	ASAH2	N-acylsphingosine amidohydrolase (non-lysosomal ceramidase) 2	Q9NR71
3213-65	3213-65_2	Human	4811	NID1	nidogen 1	P14543
3216-2	3216-2_2	Human	5284	PIGR	polymeric immunoglobulin receptor	P01833
3220-40	3220-40_2	Human	5979	RET	ret proto-oncogene	P07949
3221-54	3221-54_1	Human	6422	SFRP1	secreted frizzled-related protein 1	Q8N474
3222-11	3222-11_2	Human	10371	SEMA3A	sema domain, immunoglobulin domain (Ig), short basic domain, secreted, (semaphorin) 3A	Q14563
3232-28	3232-28_2	Human	54	ACP5	acid phosphatase 5, tartrate resistant	P13686
3234-23	3234-23_2	Human	151887	CCDC80	coiled-coil domain containing 80	Q76M96
3235-50	3235-50_2	Human	124857	WFIKKN2	WAP, follistatin/kazal, immunoglobulin, kunitz and netrin domain containing 2	Q8TEU8
3280-49	3280-49_2	Human	176	ACAN	aggrecan	P16112
3283-21	3283-21_1	Human	7045	TGFBI	transforming growth factor, beta-induced, 68kDa	Q15582
3284-75	3284-75_1	Human	633	BGN	biglycan	P21810
3285-23	3285-23_2	Human	715	C1R	complement component 1, r subcomponent	P00736
3290-50	3290-50_2	Human	135228	CD109	CD109 molecule	Q6YHK3
3291-30	3291-30_2	Human	2208	FCER2	Fc fragment of IgE, low affinity II, receptor for (CD23)	P06734
3292-75	3292-75_1	Human	962	CD48	CD48 molecule	P09326
3293-2	3293-2_4	Human	922	CD5L	CD5 molecule-like	O43866
3294-55	3294-55_2	Human	55997	CFC1	cripto, FRL-1, cryptic family 1	P0CG37
3296-92	3296-92_2	Human	6900	CNTN2	contactin 2 (axonal)	Q02246
3298-52	3298-52_2	Human	152330	CNTN4	contactin 4	Q8IWV2
3299-29	3299-29_2	Human	53942	CNTN5	contactin 5	O94779
3302-58	3302-58_1	Human	8530	CST7	cystatin F (leukocystatin)	O76096
3305-6	3305-6_1	Human	54567	DLL4	delta-like 4 (Drosophila)	Q9NR61
3309-2	3309-2_2	Human	2212	FCGR2A	Fc fragment of IgG, low affinity IIa, receptor (CD32)	P12318
3310-62	3310-62_1	Human	2213	FCGR2B	Fc fragment of IgG, low affinity IIb, receptor (CD32)	P31994
3311-27	3311-27_1	Human	2215	FCGR3B	Fc fragment of IgG, low affinity IIIb, receptor (CD16b)	O75015
3312-64	3312-64_1	Human	2209	FCGR1A	Fc fragment of IgG, high affinity Ia, receptor (CD64)	P12314
3313-21	3313-21_2	Human	2220	FCN2	ficolin (collagen/fibrinogen domain containing lectin) 2 (hucolin)	Q15485
3314-74	3314-74_2	Human	2674	GFRA1	GDNF family receptor alpha 1	P56159
3315-15	3315-15_1	Human	221914	GPC2	glypican 2	Q8N158
3316-58	3316-58_1	Human	3053	SERPIND1	serpin peptidase inhibitor, clade D (heparin cofactor), member 1	P05546
3317-33	3317-33_1	Human	27429	HTRA2	HtrA serine peptidase 2	O43464
3320-49	3320-49_2	Human	3490	IGFBP7	insulin-like growth factor binding protein 7	Q16270
3321-2	3321-2_2	Human	11009	IL24	interleukin 24	Q13007
3322-52	3322-52_2	Human	121227	LRIG3	leucine-rich repeats and immunoglobulin-like domains 3	Q6UXM1
3323-37	3323-37_1	Human	7804	LRP8	low density lipoprotein receptor-related protein 8, apolipoprotein e receptor	Q14114
3324-51	3324-51_1	Human	4063	LY9	lymphocyte antigen 9	Q9HBG7
3325-2	3325-2_2	Human	4147	MATN2	matrilin 2	O00339
3326-58	3326-58_2	Human	23705	CADM1	cell adhesion molecule 1	Q9BY67
3327-27	3327-27_1	Human	59277	NTN4	netrin 4	Q9HB63
3329-14	3329-14_2	Human	8993	PGLYRP1	peptidoglycan recognition protein 1	O75594
3331-8	3331-8_1	Human	285704	RGMB	RGM domain family, member B	Q6NW40
3332-57	3332-57_1	Human	148738	HFE2	hemochromatosis type 2 (juvenile)	Q6ZVN8
3336-50	3336-50_1	Human	7035	TFPI	tissue factor pathway inhibitor (lipoprotein-associated coagulation inhibitor)	P10646
3339-33	3339-33_1	Human	7058	THBS2	thrombospondin 2	P35442
3340-53	3340-53_1	Human	7060	THBS4	thrombospondin 4	P35443
3341-33	3341-33_4	Human	25	ABL1	c-abl oncogene 1, non-receptor tyrosine kinase	P00519
3342-76	3342-76_4	Human	27	ABL2	v-abl Abelson murine leukemia viral oncogene homolog 2	P42684
3343-1	3343-1_4	Human	95	ACY1	aminoacylase 1	Q03154
3344-60	3344-60_4	Human	462	SERPINC1	serpin peptidase inhibitor, clade C (antithrombin), member 1	P01008
3346-72	3346-72_2	Human	9212	AURKB	aurora kinase B	Q96GD4
3347-9	3347-9_2	Human	156	GRK2	adrenergic, beta, receptor kinase 1	P25098
3348-49	3348-49_2	Human	649	BMP1	bone morphogenetic protein 1	P13497
3350-53	3350-53_2	Human	815	CAMK2A	calcium/calmodulin-dependent protein kinase II alpha	Q9UQM7
3351-1	3351-1_1	Human	816	CAMK2B	calcium/calmodulin-dependent protein kinase II beta	Q13554
3352-80	3352-80_3	Human	765	CA6	carbonic anhydrase VI	P23280
3356-50	3356-50_1	Human	766	CA7	carbonic anhydrase VII	P43166
3357-67	3357-67_2	Human	1017	CDK2	cyclin-dependent kinase 2	P24941|P20248
3357-67	3357-67_2	Human	890	CCNA2	cyclin A2	P24941|P20248
3358-51	3358-51_2	Human	1020	CDK5	cyclin-dependent kinase 5	Q00535|Q15078
3358-51	3358-51_2	Human	8851	CDK5R1	cyclin-dependent kinase 5, regulatory subunit 1 (p35)	Q00535|Q15078
3359-11	3359-11_2	Human	1024	CDK8	cyclin-dependent kinase 8	P49336|P24863
3359-11	3359-11_2	Human	892	CCNC	cyclin C	P49336|P24863
3361-26	3361-26_2	Human	50489	CD207	CD207 molecule, langerin	Q9UJ71
3362-61	3362-61_2	Human	91851	CHRDL1	chordin-like 1	Q9BU40
3363-31	3363-31_4	Human	1445	CSK	c-src tyrosine kinase	P41240
3364-76	3364-76_2	Human	1515	CTSV	cathepsin L2	O60911
3365-7	3365-7_2	Human	27121	DKK4	dickkopf homolog 4 (Xenopus laevis)	Q9UBT3
3366-51	3366-51_2	Human	1893	ECM1	extracellular matrix protein 1	Q16610
3367-8	3367-8_3	Human	26998	FETUB	fetuin B	Q9UGM5
3373-5	3373-5_2	Human	2999	GZMH	granzyme H (cathepsin G-like 2, protein h-CCPX)	P20718
3374-49	3374-49_2	Human	3055	HCK	hemopoietic cell kinase	P08631
3376-49	3376-49_2	Human	54756	IL17RD	interleukin 17 receptor D	Q8NFM7
3378-49	3378-49_2	Human	5650	KLK7	kallikrein-related peptidase 7	P49862
3379-29	3379-29_1	Human	5584	PRKCI	protein kinase C, iota	P41743
3381-24	3381-24_2	Human	4067	LYN	v-yes-1 Yamaguchi sarcoma viral related oncogene homolog	P07948
3387-1	3387-1_2	Human	5063	PAK3	p21 protein (Cdc42/Rac)-activated kinase 3	O75914
3388-58	3388-58_2	Human	57144	PAK5	p21 protein (Cdc42/Rac)-activated kinase 7	Q9P286
3389-7	3389-7_2	Human	5104	SERPINA5	serpin peptidase inhibitor, clade A (alpha-1 antiproteinase, antitrypsin), member 5	P05154
3390-72	3390-72_2	Human	5290	PIK3CA	phosphoinositide-3-kinase, catalytic, alpha polypeptide	P42336|P27986
3390-72	3390-72_2	Human	5295	PIK3R1	phosphoinositide-3-kinase, regulatory subunit 1 (alpha)	P42336|P27986
3391-10	3391-10_2	Human	5294	PIK3CG	phosphoinositide-3-kinase, catalytic, gamma polypeptide	P48736
3392-68	3392-68_2	Human	10000	AKT3	v-akt murine thymoma viral oncogene homolog 3 (protein kinase B, gamma)	P31749|P31751|Q9Y243
3394-81	3394-81_2	Human	5347	PLK1	polo-like kinase 1	P53350
3396-54	3396-54_2	Human	5972	REN	renin	P00797
3397-7	3397-7_4	Human	5781	PTPN11	protein tyrosine phosphatase, non-receptor type 11	Q06124
3399-31	3399-31_2	Human	55576	STAB2	stabilin 2	Q8WWQ8
3400-49	3400-49_2	Human	29110	TBK1	TANK-binding kinase 1	Q9UHD2
3401-8	3401-8_2	Human	5771	PTPN2	protein tyrosine phosphatase, non-receptor type 2	P17706
3403-1	3403-1_2	Human	64499	TPSB2	tryptase beta 2 (gene/pseudogene)	P20231
3404-51	3404-51_2	Human	25823	TPSG1	tryptase gamma 1	Q9NRR2
3405-6	3405-6_2	Human	51506	UFC1	ubiquitin-fold modifier conjugating enzyme 1	Q9Y3C8
3412-7	3412-7_1	Human	596	BCL2		P10415
3413-50	3413-50_2	Human	597	BCL2A1	BCL2-related protein A1	Q16548
3414-40	3414-40_2	Human	660	BMX	BMX non-receptor tyrosine kinase	P51813
3415-61	3415-61_2	Human	3381	IBSP	integrin-binding sialoprotein	P21815
3418-12	3418-12_2	Human	57118	CAMK1D	calcium/calmodulin-dependent protein kinase ID	Q8IU85
3419-49	3419-49_2	Human	817	CAMK2D	calcium/calmodulin-dependent protein kinase II delta	Q13557
3420-21	3420-21_2	Human	377677	CA13	carbonic anhydrase XIII	Q8N1Q1
3421-54	3421-54_2	Human	944	TNFSF8	tumor necrosis factor (ligand) superfamily, member 8	P32971
3422-4	3422-4_2	Human	891	CCNB1	cyclin B1	P06493|P14635
3422-4	3422-4_2	Human	983	CDK1	cyclin-dependent kinase 1	P06493|P14635
3423-59	3423-59_2	Human	1215	CMA1	chymase 1, mast cell	P23946
3427-63	3427-63_2	Human	1457	CSNK2A1	casein kinase 2, alpha 1 polypeptide	P68400
3431-54	3431-54_2	Human	2041	EPHA1	EPH receptor A1	P21709
3432-21	3432-21_2	Human	2042	EPHA3	EPH receptor A3	P29320
3434-34	3434-34_1	Human	2335	FN1	fibronectin 1	P02751
3435-53	3435-53_2	Human	2335	FN1	fibronectin 1	P02751
3437-80	3437-80_3	Human	2322	FLT3	fms-related tyrosine kinase 3	P36888
3438-10	3438-10_2	Human	10272	FSTL3	follistatin-like 3 (secreted glycoprotein)	O95633
3440-7	3440-7_2	Human	3001	GZMA	granzyme A (granzyme 1, cytotoxic T-lymphocyte-associated serine esterase 3)	P12544
3441-64	3441-64_2	Human	2931	GSK3A	glycogen synthase kinase 3 alpha	P49840|P49841
3441-64	3441-64_2	Human	2932	GSK3B	glycogen synthase kinase 3 beta	P49840|P49841
3445-53	3445-53_2	Human	3601	IL15RA	interleukin 15 receptor, alpha	Q13261
3447-64	3447-64_2	Human	3576	CXCL8	interleukin 8	P10145
3448-13	3448-13_2	Human	3643	INSR	insulin receptor	P06213
3449-58	3449-58_2	Human	5267	SERPINA4	serpin peptidase inhibitor, clade A (alpha-1 antiproteinase, antitrypsin), member 4	P29622
3450-4	3450-4_2	Human	5653	KLK6	kallikrein-related peptidase 6	Q92876
3452-17	3452-17_2	Human	3932	LCK	lymphocyte-specific protein tyrosine kinase	P06239
3453-87	3453-87_2	Human	4067	LYN	v-yes-1 Yamaguchi sarcoma viral related oncogene homolog	P07948
3457-57	3457-57_1	Human	10631	POSTN	periostin, osteoblast specific factor	Q15063
3459-49	3459-49_2	Human	5159	PDGFRB	platelet-derived growth factor receptor, beta polypeptide	P09619
3461-58	3461-58_1	Human	63827	BCAN	brevican	Q96GW7
3466-8	3466-8_2	Human	5566	PRKACA	protein kinase, cAMP-dependent, catalytic, alpha	P17612
3469-74	3469-74_1	Human	6197	RPS6KA3	ribosomal protein S6 kinase, 90kDa, polypeptide 3	P51812
3470-1	3470-1_2	Human	6401	SELE	selectin E	P16581
3471-49	3471-49_1	Human	8576	STK16	serine/threonine kinase 16	O75716
3472-40	3472-40_2	Human	332	BIRC5	baculoviral IAP repeat containing 5	O15392
3473-78	3473-78_2	Human	4352	MPL	myeloproliferative leukemia virus oncogene	P40238
3474-19	3474-19_2	Human	7057	THBS1	thrombospondin 1	P07996
3477-63	3477-63_2	Human	4914	NTRK1	neurotrophic tyrosine kinase, receptor, type 1	P04629
3480-7	3480-7_1	Human	1845	DUSP3	dual specificity phosphatase 3	P51452
3481-87	3481-87_1	Human	7511	XPNPEP1	X-prolyl aminopeptidase (aminopeptidase P) 1, soluble	Q9NQW7
3484-60	3484-60_2	Human	183	AGT	angiotensinogen (serpin peptidase inhibitor, clade A, member 8)	P01019
3485-28	3485-28_2	Human	567	B2M	beta-2-microglobulin	P61769
3486-58	3486-58_2	Human	2246	FGF1	fibroblast growth factor 1 (acidic)	P05230
3487-32	3487-32_2	Human	10563	CXCL13		O43927
3488-64	3488-64_2	Human	847	CAT		P04040
3489-9	3489-9_2	Human	1270	CNTF		P26441
3494-71	3494-71_3	Human	8822	FGF17	fibroblast growth factor 17	O60258
3495-15	3495-15_2	Human	6372	CXCL6	chemokine (C-X-C motif) ligand 6 (granulocyte chemotactic protein 2)	P80162
3497-13	3497-13_2	Human	3440	IFNA2	interferon, alpha 2	P01563
3499-77	3499-77_2	Human	27190	IL17B	interleukin 17B	Q9UHF5
3503-4	3503-4_2	Human	3672	ITGA1	integrin, alpha 1	P56199|P05556
3503-4	3503-4_2	Human	3688	ITGB1	integrin, beta 1 (fibronectin receptor, beta polypeptide, antigen CD29 includes MDF2, MSK12)	P56199|P05556
3504-58	3504-58_2	Human	57817	HAMP	hepcidin antimicrobial peptide	P81172
3505-6	3505-6_2	Human	4049	LTA	lymphotoxin alpha (TNF superfamily, member 1)	P01374|Q06643
3505-6	3505-6_2	Human	4050	LTB	lymphotoxin beta (TNF superfamily, member 3)	P01374|Q06643
3506-49	3506-49_1	Human	4049	LTA	lymphotoxin alpha (TNF superfamily, member 1)	P01374|Q06643
3506-49	3506-49_1	Human	4050	LTB	lymphotoxin beta (TNF superfamily, member 3)	P01374|Q06643
3508-78	3508-78_3	Human	6367	CCL22	chemokine (C-C motif) ligand 22	O00626
3516-60	3516-60_2	Human	6387	CXCL12	chemokine (C-X-C motif) ligand 12	P48061
3518-54	3518-54_2	Human	1361	CPB2	carboxypeptidase B2 (plasma)	Q96IY4
3519-3	3519-3_2	Human	6361	CCL17	chemokine (C-C motif) ligand 17	Q92583
3520-58	3520-58_1	Human	7043	TGFB3	transforming growth factor, beta 3	P10600
3521-16	3521-16_2	Human	1081	CGA	glycoprotein hormones, alpha polypeptide	P01215|P01222
3521-16	3521-16_2	Human	7252	TSHB	thyroid stimulating hormone, beta	P01215|P01222
3522-57	3522-57_1	Human	7432	VIP	vasoactive intestinal peptide	P01282
3534-14	3534-14_2	Human	959	CD40LG	CD40 ligand	P29965
3535-84	3535-84_1	Human	22943	DKK1	dickkopf homolog 1 (Xenopus laevis)	O94907
3538-26	3538-26_1	Human	1644	DDC	dopa decarboxylase (aromatic L-amino acid decarboxylase)	P20711
3554-24	3554-24_1	Human	9370	ADIPOQ	adiponectin, C1Q and collagen domain containing	Q15848
3580-25	3580-25_8	Human	5265	SERPINA1	serpin peptidase inhibitor, clade A (alpha-1 antiproteinase, antitrypsin), member 1	P01009
3581-53	3581-53_3	Human	197	AHSG	alpha-2-HS-glycoprotein	P02765
3583-54	3583-54_4	Human	410	ARSA	arylsulfatase A	P15289
3585-54	3585-54_4	Human	682	BSG	basigin (Ok blood group)	P35613
3587-53	3587-53_2	Human	27302	BMP10	bone morphogenetic protein 10	O95393
3592-4	3592-4_3	Human	8536	CAMK1	calcium/calmodulin-dependent protein kinase I	Q14012
3593-72	3593-72_3	Human	836	CASP3	caspase 3, apoptosis-related cysteine peptidase	P42574
3600-2	3600-2_3	Human	1118	CHIT1	chitinase 1 (chitotriosidase)	Q13231
3603-60	3603-60_5	Human	64581	CLEC7A	C-type lectin domain family 7, member A	Q9BXN2
3605-77	3605-77_4	Human	5648	MASP1	mannan-binding lectin serine peptidase 1 (C4/C2 activating component of Ra-reactive factor)	P48740
3607-71	3607-71_1	Human	27122	DKK3	dickkopf homolog 3 (Xenopus laevis)	Q9UBP4
3616-3	3616-3_5	Human	2799	GNS	glucosamine (N-acetyl)-6-sulfatase	P15586
3617-80	3617-80_4	Human	3083	HGFAC	HGF activator	Q04756
3620-67	3620-67_2	Human	58985	IL22RA1	interleukin 22 receptor, alpha 1	Q8N6P7
3622-33	3622-33_4	Human	5641	LGMN	legumain	Q99538
3623-84	3623-84_4	Human	9450	LY86	lymphocyte antigen 86	O95711
3627-71	3627-71_4	Human	79258	MMEL1	membrane metallo-endopeptidase-like 1	Q495T6
3628-3	3628-3_4	Human	5605	MAP2K2	mitogen-activated protein kinase kinase 2	P36507
3629-60	3629-60_4	Human	9578	CDC42BPB	CDC42 binding protein kinase beta (DMPK-like)	Q9Y5S2
3630-27	3630-27_4	Human	57863	CADM3	cell adhesion molecule 3	Q8N126
3640-14	3640-14_3	Human	4043	LRPAP1	low density lipoprotein receptor-related protein associated protein 1	P30533
3647-49	3647-49_4	Human	23643	LY96	lymphocyte antigen 96	O00206|Q9Y6Y9
3647-49	3647-49_4	Human	7099	TLR4	toll-like receptor 4	O00206|Q9Y6Y9
3651-50	3651-50_5	Human	3791	KDR	kinase insert domain receptor (a type III receptor tyrosine kinase)	P35968
3685-53	3685-53_1	Human	83552	MFRP	membrane frizzled-related protein	Q9BY79
3708-62	3708-62_1	Human	2	A2M	alpha-2-macroglobulin	P01023
3710-49	3710-49_2	Human	5340	PLG	plasminogen	P00747
3714-49	3714-49_2	Human	1152	CKB	creatine kinase, brain	P12277|P06732
3714-49	3714-49_2	Human	1158	CKM	creatine kinase, muscle	P12277|P06732
3719-2	3719-2_2	Human	1027	CDKN1B	cyclin-dependent kinase inhibitor 1B (p27, Kip1)	P46527
3723-1	3723-1_2	Human	4879	NPPB	natriuretic peptide B	P16860
3727-35	3727-35_1	Human	5697	PYY	peptide YY	P10082
3728-52	3728-52_2	Human	6343	SCT	secretin	P09683
3730-81	3730-81_2	Human	7293	TNFRSF4	tumor necrosis factor receptor superfamily, member 4	P43489
3738-54	3738-54_4	Human	1435	CSF1	colony stimulating factor 1 (macrophage)	P09603
3758-68	3758-68_3	Human	5624	PROC	protein C (inactivator of coagulation factors Va and VIIIa)	P04070
3761-4	3761-4_2	Human	5743	PTGS2	prostaglandin-endoperoxide synthase 2 (prostaglandin G/H synthase and cyclooxygenase)	P35354
3773-15	3773-15_4	Human	7010	TEK	TEK tyrosine kinase, endothelial	Q02763
3795-6	3795-6_2	Human	8754	ADAM9	ADAM metallopeptidase domain 9	Q13443
3796-79	3796-79_2	Human	51129	ANGPTL4	angiopoietin-like 4	Q9BY76
3797-1	3797-1_1	Human	1000	CDH2	cadherin 2, type 1, N-cadherin (neuronal)	P19022
3798-71	3798-71_1	Human	768	CA9	carbonic anhydrase IX	Q16790
3799-11	3799-11_2	Human	761	CA3	carbonic anhydrase III, muscle specific	P07451
3800-71	3800-71_2	Human	1152	CKB	creatine kinase, brain	P12277
3800-71	3800-71_2	Human	1158	CKM	creatine kinase, muscle	P12277
3803-10	3803-10_2	Human	1473	CST5	cystatin D	P28325
3805-16	3805-16_2	Human	11082	ESM1	endothelial cell-specific molecule 1	Q9NQ30
3806-55	3806-55_1	Human	2044	EPHA5	EPH receptor A5	P54756
3807-1	3807-1_2	Human	8074	FGF23	fibroblast growth factor 23	Q9GZV9
3808-76	3808-76_2	Human	2263	FGFR2	fibroblast growth factor receptor 2	P21802
3809-1	3809-1_2	Human	2261	FGFR3	fibroblast growth factor receptor 3	P22607
3810-50	3810-50_2	Human	2268	FGR	Gardner-Rasheed feline sarcoma viral (v-fgr) oncogene homolog	P09769
3813-3	3813-3_2	Human	2534	FYN	FYN oncogene related to SRC, FGR, YES	P06241
3815-14	3815-14_1	Human	3595	IL12RB2	interleukin 12 receptor, beta 2	Q99665
3817-18	3817-18_1	Human	5588	PRKCQ	protein kinase C, theta	Q04759
3820-68	3820-68_2	Human	9261	MAPKAPK2	mitogen-activated protein kinase-activated protein kinase 2	P49137
3821-28	3821-28_1	Human	8550	MAPKAPK5	mitogen-activated protein kinase-activated protein kinase 5	Q8IW41
3822-54	3822-54_2	Human	7867	MAPKAPK3	mitogen-activated protein kinase-activated protein kinase 3	Q16644
3823-9	3823-9_1	Human	4145	MATK	megakaryocyte-associated tyrosine kinase	P42679
3825-18	3825-18_2	Human	5599	MAPK8	mitogen-activated protein kinase 8	P45983
3827-22	3827-22_1	Human	56924	PAK6	p21 protein (Cdc42/Rac)-activated kinase 6	Q9NQU5
3831-21	3831-21_1	Human	5728	PTEN	phosphatase and tensin homolog	P60484
3832-51	3832-51_1	Human	5753	PTK6	PTK6 protein tyrosine kinase 6	Q13882
3835-11	3835-11_2	Human	7097	TLR2	toll-like receptor 2	O60603
3836-51	3836-51_2	Human	51569	UFM1	ubiquitin-fold modifier 1	P61960
3837-6	3837-6_2	Human	7535	ZAP70	zeta-chain (TCR) associated protein kinase 70kDa	P43403
3839-60	3839-60_2	Human	9049	AIP	aryl hydrocarbon receptor interacting protein	O00170
3844-2	3844-2_1	Human	5478	PPIA	peptidylprolyl isomerase A (cyclophilin A)	P62937
3845-51	3845-51_2	Human	83658	DYNLRB1	dynein, light chain, roadblock-type 1	Q9NP97
3847-56	3847-56_2	Human	23474	ETHE1	ethylmalonic encephalopathy 1	O95571
[truncated: 2,944 more rows]

## Sheet: Table S3
Table S3: Demographics of proteomics samples before QC or matching to GWAS data.
Cohort	# Proteomics Samples	Avg. Age	% Male	%APOE4+	#CO	#AD	#ADAD	#ADRD	#PD
Discovery
ADNI	758	73.6 (SD 7.5)	57.5	48.9	169	567	0	22	0
PPMI	1158	61.6 (SD 9.34)	55.1	NA	185	0	0	1	972
FACE	632	72.2 (SD 8.4)	41.6	35.1	172	361	0	99	0
Replication
DIAN	495	39.7 (SD 10.9)	43	30.7	181	8	300	6	0
MAP	948	70.9 (SD 8.7)	46.6	39.2	673	202	3	67	3
Barcelona-1	232	69.5 (SD 8.1)	52.6	NA	4	71	0	156	1
Total	4223				1384	1209	303	351	976
%APOE4+: percent of APOE ɛ4 allele carriers
#CO: Number of neurologically healthy controls
#AD: number of cases with late-onset Alzheimer's disease
#ADAD: number of cases with autosomal dominant Alzheimer's disease
#ADRD: number of cases with Alzheimer's disease-related dementias
#PD: number of cases with Parkinson's disease

## Sheet: Table S4
Table S4. Summary of sample removal based on step for all samples.
Filtering Step	# Samples Remaining	# Samples Removed
Start	4223	0
Matching to GWAS Data	3726	497
Filtering based on proteomics QC	3581	145
Genetic principal component filtering	3328	253
Identity by Descent filtering	3107	221

## Sheet: Table S5
Table S5. Summary statistics of index SNPs in meta-analysis with MAF, most severe variant annotation, beta and p-value in discovery, replication, AT+ samples, AT- samples, and external replication using SOMAscan and Olink (if applicable).
MarkerName	Allele1	Allele2	Effect	StdErr	log(P)	Direction	HetISq	HetChiSq	HetDf	logHetP	SomaID	target	Start position	Start Chr	CHR	BP	type	MAF	rsID	EntrezGeneSymbol	UniprotID	beta_discovery	pval_discovery	beta_replication	pval_replication	beta_at_positive	pval_at_positive	beta_at_negative	pval_at_negative	stanford_soma_beta	stanford_soma_logp	drug_candidates	variant_consequence	variant_severity	affected_gene		Data Dictionary
chr10:100164661:T:C	t	c	-0.2132	0.0252	-16.57	--	16.5	1.197	1	0.2739	X8776.10	Erlin-1	100150094	10	10	100164661	cis	0.472149	rs10883451	ERLIN1	O75477	-0.234511	12.6932	-0.177564	4.94704	-0.174609	0.000947529	-0.213719	1.01e-05	-0.155848	0.860312		intron_variant	MODIFIER	ERLIN1		MarkerName	Location on GRCh38 and alleles of the index pQTL variant
chr10:101608897:T:C	t	c	-0.1641	0.0298	-7.44	--	0	0.317	1	0.5735	X23272.8	Protein DPCD	101570560	10	10	101608897	cis	0.313003	rs7006	DPCD	Q9BVM2	-0.145164	2.89667	-0.178933	5.16875	-0.229148	1.14e-05	-0.084934	0.0742727	NA	NA		missense_variant	MODERATE	DPCD		Allele1	Effect allele tested
chr10:102659708:G:T	t	g	-0.2225	0.0379	-8.37	--	0	0.767	1	0.3811	X12571.14	ADP-ribosylation factor-like protein 3	102673731	10	10	102659708	cis	0.0896363	rs10883760	ARL3	P36405	-0.194921	4.1205	-0.262404	5.02219	-0.178864	0.0106074	-0.274994	1.71e-05	-0.64359	3.50419	DB03814;DB04315;	downstream_gene_variant	MODIFIER	TRIM8		Allele2	Alternate allele
chr10:112283482:T:C	t	c	-1.2969	0.0585	-108	--	0	0.029	1	0.8651	X21549.144	Beta-tectorin	112283400	10	10	112283482	cis	0.0700032	rs11195870	TECTB	Q96PL2	-1.30606	53.2865	-1.28611	45.4353	-1.37872	5.29e-31	-1.3647	2.88e-47	NA	NA		upstream_gene_variant	MODIFIER	TECTB		Effect	Effect size of Allele1 on levels of the corresponding aptamer
chr10:114299969:G:A	a	g	-0.5698	0.0511	-28.1	--	0	0.912	1	0.3396	X7128.9	von Willebrand factor A domain-containing protein 2	114239254	10	10	114299969	cis	0.0580946	rs11196687	VWA2	Q5GFL6	-0.602671	21.3202	-0.49722	7.3277	-0.716655	7e-12	-0.400948	4.23e-05	-0.942325	6.99223		intron_variant	MODIFIER	AFAP1L2		StdErr	Standard error of the effect size
chr10:114959784:G:A	a	g	-0.2445	0.0292	-16.25	--	22.6	1.291	1	0.2558	X23543.92	Probable tRNA pseudouridine synthase 1	114938195	10	10	114959784	cis	0.464122	rs7099565	TRUB1	Q8WWH5	-0.211891	6.58231	-0.278273	10.5063	-0.287238	3.13e-07	-0.276125	6.13e-10	NA	NA		missense_variant	MODERATE	TRUB1		log(P)	Base-10 log of the association p-value
chr10:116256860:G:A	a	g	-0.8239	0.068	-33.1	--	0	0.036	1	0.8491	X3314.74	GDNF family receptor alpha-1	116056925	10	10	116256860	cis	0.0339556	rs17807102	GFRA1	P56159	-0.814851	21.5404	-0.842387	11.9724	-0.843122	3.51e-12	-0.901341	2.05e-12	-0.83887	1.99297		intron_variant	MODIFIER	GFRA1		Direction	Direction of the effect size in discovery and replication
chr10:116493877:G:A	a	g	0.6276	0.0599	-24.98	++	26.1	1.354	1	0.2446	X15613.16	Pancreatic triacylglycerol lipase	116545931	10	10	116493877	cis	0.0696814	rs2420290	PNLIP	P16233	0.557521	10.191	0.696904	15.6433	0.584815	7.2e-09	0.685842	3.61e-13	0.749098	2.69981	DB04233;DB02451;DB06586;DB08909;DB08222;DB01083;	intergenic_variant	MODIFIER	-		HetISq	I^2 statistic which measures heterogeneity on scale of 0-100%
chr10:116638373:A:G	a	g	-1.0688	0.0193	-668.84	--	81	5.251	1	0.02193	X15471.29	Pancreatic lipase-related protein 2	116620953	10	10	116638373	cis	0.481332	rs4751995	PNLIPRP2	P54317	-1.118	205.998	-1.02911	220.428	-1.10918	9.91e-143	-1.04131	3.61e-170	-1.14509	39.6655	DB02613;	stop_lost	HIGH	PNLIPRP2		HetChiSq	chi-squared statistic in simple test of heterogeneity
chr10:116638373:A:G	a	g	-0.2399	0.0242	-22.36	--	92.1	12.598	1	0.0003861	X6957.14	Pancreatic lipase-related protein 2	116620953	10	10	116638373	cis	0.481332	rs4751995	PNLIPRP2	P54317	-0.314137	21.46	-0.140167	3.77851	-0.128389	0.0069024	-0.0932863	0.0390856	NA	NA	DB02613;	stop_lost	HIGH	PNLIPRP2		df	Degrees of freedom for heterogeneity statistics
chr10:122483301:G:A	a	g	0.2118	0.0288	-12.68	++	12.9	1.148	1	0.284	X8776.10	Erlin-1	100150094	10	10	122483301	trans	0.256035	rs2300431	ERLIN1	O75477	0.187221	6.44303	0.250643	7.4082	0.255125	2.13e-05	0.195057	0.000380776	0.305071	2.01551		intron_variant	MODIFIER	HTRA1		logHetP	log of p-value for heterogeneity statistic
chr10:126333348:G:A	a	g	0.2831	0.0238	-31.92	++	43.6	1.773	1	0.1831	X4420.7	Disintegrin and metalloproteinase domain-containing protein 12	126012381	10	10	126333348	cis	0.467815	rs11244958	ADAM12	O43184	0.307985	23.0178	0.242785	9.53092	0.275348	2.36e-08	0.236558	1.17e-08	0.274099	2.06843		intron_variant	MODIFIER	ADAM12		SomaID	Aptamer ID from Somalogic
chr10:126338732:T:C	t	c	-0.2473	0.0279	-18.12	--	32.1	1.473	1	0.2248	X19335.2	Hematological and neurological expressed 1 protein	75135248	17	10	126338732	trans	0.416157	rs10901598	JPT1	Q9UK76	-0.212439	6.90534	-0.280185	12.083	-0.259202	2.54e-08	-0.278852	3.77e-10	-0.264988	1.9926		intron_variant	MODIFIER	ADAM12		target	Name of the targeted protein
chr10:129708019:C:T	t	c	-0.8348	0.0385	-103.52	--	40.4	1.677	1	0.1953	X21437.77	Methylated-DNA--protein-cysteine methyltransferase	129467190	10	10	129708019	cis	0.130512	rs12917	MGMT	P16455	-0.78062	38.9695	-0.880683	56.8948	-0.949405	3.93e-38	-0.812979	2.13e-37	NA	NA	DB00151;DB11831;DB04531;DB02216;DB01593;DB14487;DB14533;DB14548;	missense_variant	MODERATE	MGMT		Start Position	Base pair (GRCh38) of the transcription start site of the gene encoding the associated protein
chr10:13234368:G:A	a	g	-0.9086	0.0356	-142.59	--	0	0.128	1	0.7204	X10977.55	Unique cartilage matrix-associated protein	13221766	10	10	13234368	cis	0.118281	rs2399954	UCMA	Q8WVF2	-0.899356	87.6093	-0.926213	48.91	-1.07186	4.82e-53	-0.8511	2.06e-38	-0.979203	10.9468		5_prime_UTR_variant	MODIFIER	UCMA		Start Chr	Chromosome where the protein-codin gene is located
chr10:14869641:C:T	t	c	0.5583	0.033	-63.5	++	0	0.041	1	0.8389	X4962.52	Cerebral dopamine neurotrophic factor	14819245	10	10	14869641	cis	0.131316	rs72772427	CDNF	Q49AH0	0.553555	39.8886	0.567755	22.1338	0.599056	2.8e-21	0.669152	3.13e-29	0.513173	2.41021		intron_variant	MODIFIER	HSPA14		CHR	chromosome where the association is located
chr10:15089115:A:G	a	g	0.4331	0.0476	-19.01	++	0	0.176	1	0.6748	X13563.259	Acyl-CoA-binding domain-containing protein 7	15075475	10	10	15089115	cis	0.0712906	rs117564239	ACBD7	Q8N6N7	0.418577	11.7566	0.460585	7.93701	0.392109	0.000181739	0.575296	2.65e-10	-0.0453992	0.0729651		upstream_gene_variant	MODIFIER	ACBD7		BP	Base pair (GRCh38) of the association
chr10:17323147:G:A	a	g	1.0216	0.1603	-9.73	++	0	0.367	1	0.5446	X6930.95	Alpha-2,8-sialyltransferase 8F	17315421	10	10	17323147	cis	0.00611522	rs150777747	ST8SIA6	P61647	0.914538	3.88291	1.1097	6.46251	1.00209	0.0281914	1.12156	6.63e-06	0.873913	0.404111		missense_variant	MODERATE	ST8SIA6		type	association type (cis/trans)
chr10:17847024:T:C	t	c	0.3208	0.0267	-32.52	++	0	0.069	1	0.7923	X2637.77	Macrophage mannose receptor 1	17809348	10	10	17847024	cis	0.2327	rs368174648	MRC1	P22897	0.31518	19.2936	0.329614	13.615	0.371383	1.53e-13	0.291419	1.28e-09	0.264999	1.36584	DB09266;	downstream_gene_variant	MODIFIER	MIR511		MAF	Minor allele frequency
chr10:19803954:T:C	t	c	-0.1487	0.0239	-9.32	--	67.3	3.062	1	0.08014	X10576.7	Plexin domain-containing protein 2:Extracellular domain	19816239	10	10	19803954	cis	0.445446	rs958397	PLXDC2	Q6UX71	-0.1785	8.85311	-0.0901446	1.5887	-0.189874	1.72e-05	-0.0670621	0.0891976	NA	NA		intergenic_variant	MODIFIER	-		rsID	rsID corresponding to the associated variant
chr10:19816294:G:A	a	g	-0.162	0.0237	-11.08	--	62.8	2.687	1	0.1012	X13133.73	Latent-transforming growth factor beta-binding protein 4	40592883	19	10	19816294	trans	0.431767	rs7094178	LTBP4	Q8N2S1	-0.133708	5.28748	-0.215388	7.04405	-0.188245	3.07e-05	-0.174856	1.3e-05	-0.033132	0.129435		5_prime_UTR_variant	MODIFIER	PLXDC2		EntrezGeneSymbol	Entrez symbol of the gene encoding the associated protein
chr10:24952573:C:T	t	c	-1.8139	0.1327	-41.81	--	41.2	1.702	1	0.192	X20950.159	Phosphoribosyltransferase domain-containing protein 1	24848614	10	10	24952573	cis	0.0141616	rs143356584	PRTFDC1	Q9NRG1	-1.60942	14.0218	-1.96056	27.6018	-2.05901	1.11e-14	-1.63902	1.4e-15	NA	NA		start_lost	HIGH	PRTFDC1		UniprotID	UniprotID of the associated protein
chr10:31097045:C:T	t	c	0.1804	0.0256	-11.77	++	54.7	2.209	1	0.1373	X9796.4	Bile salt-activated lipase	133061981	9	10	31097045	trans	0.481332	rs793095	CEL	P19835	0.149494	5.2121	0.227097	7.58771	0.192997	0.000157288	0.202905	1.04e-05	0.0857616	0.355146	DB04348;	intron_variant,non_coding_transcript_variant	MODIFIER	-		beta_discovery	Effect size of Allele1 in the discovery analysis
chr10:3158660:T:C	t	c	-0.1888	0.0258	-12.63	--	48.7	1.948	1	0.1628	X5980.55	BolA-like protein 3	74135400	2	10	3158660	trans	0.296106	rs9423708	BOLA3	Q53S33	-0.161015	6.08862	-0.235339	7.69844	-0.169789	0.000746421	-0.181197	1.74e-06	-0.0169222	0.0452518		missense_variant	MODERATE	PITRM1		pval_discovery	Base-ten negative log p-value for the association in the discovery analysis
chr10:33191785:C:T	t	c	-0.2617	0.0244	-26.09	--	0	0.635	1	0.4256	X3214.3	Neuropilin-1	33177492	10	10	33191785	cis	0.379949	rs2506149	NRP1	O14786	-0.246543	14.5827	-0.286673	12.1124	-0.30471	9.3e-11	-0.281527	1.78e-12	NA	NA		intron_variant	MODIFIER	NRP1		beta_replication	Effect size of Allele1 in the replication analysis
chr10:33191785:C:T	t	c	-0.2771	0.0248	-28.24	--	60.4	2.528	1	0.1119	X5542.22	Neuropilin-1	33177492	10	10	33191785	cis	0.379949	rs2506149	NRP1	O14786	-0.245933	13.9097	-0.327001	15.1313	-0.30789	1.23e-10	-0.309859	1.11e-13	-0.165191	0.950936		intron_variant	MODIFIER	NRP1		pval_replication	Base-ten negative log p-value for the association in the replication analysis
chr10:43700375:C:T	t	c	0.2899	0.0512	-7.83	++	0	0.549	1	0.4588	X3516.60	Stromal cell-derived factor 1	44370165	10	10	43700375	cis	0.0379788	rs73266552	CXCL12	P48061	0.256974	3.81417	0.333535	4.72881	0.327734	0.000628756	0.0955369	0.244761	0.334108	0.458622	DB05934;DB06822;	regulatory_region_variant	MODIFIER	-		beta_at_positive	Effect size of Allele1 in individuals who are positive for CSF amyloid and tau
chr10:43701957:C:T	t	c	0.2661	0.0469	-7.87	++	0	0.397	1	0.5288	X9278.9	Stromal cell-derived factor 1	44370165	10	10	43701957	cis	0.0434503	rs112763430	CXCL12	P48061	0.238164	3.63572	0.297283	4.87705	0.295445	0.000492772	0.125511	0.0910545	0.0164042	0.0231906	DB05934;DB06822;	intergenic_variant	MODIFIER	-		pval_at_positive	Raw p-value of the association in Amyloid/Tau positive individuals
chr10:45015829:G:A	a	g	0.4081	0.054	-13.37	++	70.8	3.426	1	0.06419	X10620.21	Beta-microseminoprotein	46033307	10	10	45015829	trans	0.0452205	rs111803380	MSMB	P08118	0.497866	11.1368	0.296746	3.63288	0.30266	0.0105275	0.472132	5.29e-07	0.244712	0.613259		intron_variant,non_coding_transcript_variant	MODIFIER	CEP164P1		beta_at_negative	Effect size of Allele1 in individuals who are negative for CSF amyloid and tau
chr10:46046326:A:G	a	g	-0.7778	0.0178	-414.68	--	98.2	56.744	1	4.963e-14	X10620.21	Beta-microseminoprotein	46033307	10	10	46046326	cis	0.429514		MSMB	P08118	-0.874929	252.138	-0.591982	72.9975	-0.827816	2.45e-86	-0.678379	1.86e-68	-0.679018	12.9074		upstream_gene_variant	MODIFIER	MSMB		pval_at_negative	Raw p-value of the association in Amyloid/Tau negative individuals
chr10:47296269:C:T	t	c	-0.172	0.0293	-8.35	--	40.2	1.672	1	0.196	X6517.14	Growth/differentiation factor 10	47300197	10	10	47296269	cis	0.259736	rs11593867	GDF10	P55107	-0.203302	7.23193	-0.126076	2.21088	-0.1543	0.0114391	-0.186535	0.000357921	-0.215332	1.08541		upstream_gene_variant	MODIFIER	GDF10		stanford_soma_beta	Effect size of the association in the external replication using SADRC and SAMS
chr10:49105576:G:A	a	g	-0.3221	0.0286	-28.72	--	0	0.13	1	0.7188	X18265.18	Zinc finger protein 34	144772224	8	10	49105576	trans	0.41841	rs4509682	ZNF34	Q8IZ26	-0.311657	13.3947	-0.332244	15.7731	-0.41672	1.49e-16	-0.233989	1.79e-07	-0.475765	4.42013		missense_variant	MODERATE	VSTM4		stanford_soma_logp	Base-ten log p-value of the association in the external replication analysis
chr10:4935217:G:A	a	g	2.6491	0.385	-11.22	++	79.9	4.98	1	0.02564	X21276.11	CD133 antigen	15963076	4	10	4935217	trans	0.00202634	rs142619401	PROM1	O43490	1.74769	2.81567	3.46818	9.95685	NA	NA	2.3254	4.56e-10	NA	NA		intergenic_variant	MODIFIER	-		drug_candidates	Drugs associated with the protein as determined by DrugBank
chr10:4958996:G:A	a	g	0.2869	0.0384	-13.1	++	80.5	5.119	1	0.02366	X21271.53	Aldo-keto reductase family 1 member C2	4987775	10	10	4958996	cis	0.174928	rs55633683	AKR1C2	P52895	0.177278	2.40616	0.35581	12.343	0.214571	0.00188547	0.273854	8.07e-06	NA	NA	DB06777;DB07768;DB01039;DB13751;DB06077;DB00959;DB00461;DB00157;DB03461;DB00776;DB12612;DB01586;	upstream_gene_variant	MODIFIER	AKR1C1		variant_consequence	Annotation of the most severe consequence of any variant in high LD (R2 > 0.8) with the index pQTL variant using VEP
chr10:50227112:C:T	t	c	0.6968	0.0275	-140.61	++	0	0.284	1	0.5938	X3212.30	Neutral ceramidase	50182778	10	10	50227112	cis	0.262287	rs1013991989	ASAH2	Q9NR71	0.686343	83.6849	0.717428	47.8675	0.775077	2.66e-41	0.661346	3.66e-35	0.69001	7.15543		intron_variant	MODIFIER	ASAH2		variant_severity	Severity of the most severe consequence
chr10:5182676:G:A	a	g	-0.4684	0.0637	-12.72	--	0	0.145	1	0.7036	X17377.1	Aldo-keto reductase family 1 member C3	5035354	10	10	5182676	cis	0.0576118	rs142483811	AKR1C3	P42330	-0.492538	7.26046	-0.444074	6.02259	-0.660012	4.58e-10	-0.472446	3.21e-06	-0.478243	1.6036	DB07700;DB01536;DB00997;DB01039;DB02266;DB13751;DB00328;DB06077;DB00959;DB00157;DB03461;DB00776;DB02056;DB01698;	intron_variant,non_coding_transcript_variant	MODIFIER	AKR1C8		affected_gene	Gene affected by the most severe annotation
chr10:52775260:T:C	t	c	-0.6215	0.0312	-87.76	--	0	0.692	1	0.4055	X20442.12	Calcipressin-3	24502351	1	10	52775260	trans	0.215803	rs2165811	RCAN3	Q9UKA8	-0.647771	44.173	-0.595927	38.9236	-0.654601	8.18e-32	-0.674536	4.81e-40	NA	NA		upstream_gene_variant	MODIFIER	MBL2
chr10:52776080:T:G	t	g	-0.4666	0.03	-53.99	--	0	0.005	1	0.9457	X3000.66	Mannose-binding protein C	52765380	10	10	52776080	cis	0.215964	rs2384046	MBL2	P11226	-0.464981	32.8069	-0.469177	20.834	-0.422717	7.1e-13	-0.315136	1.67e-08	-0.637349	5.51972	DB02837;DB03879;DB04426;DB01979;DB03194;DB03721;DB01818;	upstream_gene_variant	MODIFIER	MBL2
chr10:59247774:A:G	a	g	-0.6385	0.0378	-63.28	--	0	0.38	1	0.5376	X23528.199	Phytanoyl-CoA hydroxylase-interacting protein-like	59176643	10	10	59247774	cis	0.15924	rs1459996	PHYHIPL	Q96FC7	-0.614443	27.8588	-0.661075	34.2967	-0.631317	4.52e-26	-0.551686	1.78e-29	NA	NA		missense_variant	MODERATE	PHYHIPL
chr10:5974436:C:A	a	c	0.398	0.0252	-55.29	++	0	0.792	1	0.3735	X14054.17	Interleukin-15 receptor subunit alpha	5943639	10	10	5974436	cis	0.307049	rs7086174	IL15RA	Q13261	0.415191	36.7491	0.36865	17.8768	0.353622	1.51e-11	0.40336	1.28e-20	0.446617	3.46213		intron_variant	MODIFIER	IL15RA
chr10:70121102:A:G	a	g	-0.7596	0.0533	-45.29	--	39.8	1.662	1	0.1973	X19120.33	D-amino-acid oxidase	108858932	12	10	70121102	trans	0.0917284	rs10999147	DAO	P14920	-0.829702	25.7654	-0.692131	19.0936	-0.815051	2.56e-16	-0.856537	3.13e-25	-1.32213	11.3339	DB07979;DB02838;DB04166;DB03793;DB03225;DB03147;DB03531;DB02988;	missense_variant	MODERATE	AIFM2
chr10:70888327:C:T	t	c	-0.2154	0.0244	-17.98	--	0	0.238	1	0.626	X11313.100	Pterin-4-alpha-carbinolamine dehydratase	70882280	10	10	70888327	cis	0.29691	rs2854613	PCBD1	P61457	-0.225725	11.4201	-0.201696	7.17704	-0.272549	3.23e-09	-0.203916	8.74e-07	-0.202744	1.08035	DB04400;	intron_variant	MODIFIER	PCBD1
chr10:71280387:G:A	a	g	0.2539	0.0297	-16.89	++	35.5	1.551	1	0.213	X7776.20	Netrin receptor UNC5B	71212570	10	10	71280387	cis	0.230126	rs4333942	UNC5B	Q8IZJ1	0.226077	8.83054	0.303077	9.07463	0.227116	2.71e-05	0.35815	3.53e-13	0.124275	0.466568		intron_variant	MODIFIER	UNC5B
chr10:71713125:C:T	t	c	0.2029	0.027	-13.27	++	0	0.009	1	0.923	X14123.34	V-type immunoglobulin domain-containing suppressor of T-cell activation:Extracellular domain	71747556	10	10	71713125	cis	0.257322		VSIR	Q9H7M9	0.204873	8.9219	0.19946	5.20107	0.206708	5.82e-05	0.235944	2.21e-07	0.120816	0.467878		missense_variant	MODERATE	CDH23
chr10:71777433:TG:T	t	tg	-0.4178	0.0404	-24.33	--	0	0.001	1	0.9693	X11531.24	V-type immunoglobulin domain-containing suppressor of T-cell activation:Cytoplasmic domain	71747556	10	10	71777433	cis	0.10766	rs11311051	VSIR	Q9H7M9	-0.41659	15.2106	-0.419792	9.84155	-0.504364	1.05e-09	-0.331749	6.89e-06	-0.507554	1.91178
chr10:71880970:G:A	a	g	-0.263	0.0272	-21.37	--	43.6	1.774	1	0.1829	X6453.70	Leukocyte immunoglobulin-like receptor subfamily B member 4	54643889	19	10	71880970	trans	0.270518	rs11000048	LILRB4	Q8NHJ6	-0.231435	10.5341	-0.304614	12.757	-0.262673	1.28e-06	-0.284441	3.22e-09	-0.204054	0.979351		downstream_gene_variant	MODIFIER	-
chr10:71881333:G:A	a	g	-0.2838	0.0275	-24.31	--	82.2	5.612	1	0.01784	X6207.10	Prosaposin	71816298	10	10	71881333	cis	0.281783	rs7068317	PSAP	P07602	-0.227758	10.1896	-0.359296	16.9088	-0.263132	1.44e-06	-0.321059	3.24e-11	-0.216265	1.16402	DB01966;	downstream_gene_variant	MODIFIER	-
chr10:71882896:T:G	t	g	0.2453	0.0274	-18.52	++	0	0.215	1	0.6427	X3181.50	Cathepsin S	150730079	1	10	71882896	trans	0.283875	rs4529827	CTSS	P25774	0.255568	12.3742	0.229621	6.94699	0.281833	2.02e-07	0.199385	4.35e-05	0.178199	0.783981	DB08195;DB08611;DB12010;DB03837;DB03984;DB03767;DB07587;DB07878;DB08752;DB08755;DB07589;DB07520;DB07839;	downstream_gene_variant	MODIFIER	-
chr10:72089994:C:T	t	c	-0.5061	0.024	-97.75	--	0	0.151	1	0.6975	X5491.12	Testican-2	72059034	10	10	72089994	cis	0.450917	rs1245540	SPOCK2	Q92563	-0.498908	57.095	-0.518243	36.5581	-0.459388	1.52e-22	-0.556155	7.45e-33	-0.470644	4.84869		upstream_gene_variant	MODIFIER	SPOCK2
chr10:73912301:G:A	a	g	-1.1762	0.1728	-11	--	65.1	2.863	1	0.09066	X4158.54	Urokinase-type plasminogen activator	73909177	10	10	73912301	cis	0.00571709		PLAU	P00749	-1.40145	9.83162	-0.796554	2.31052	-0.538621	0.125747	-1.03953	0.00156897	-0.244827	0.136727	DB07129;DB07122;DB01905;DB02287;DB03729;DB01725;DB08072;DB07625;DB07626;DB08697;DB03136;DB01977;DB07076;DB03082;DB02705;DB02473;DB02398;DB02551;DB03865;DB06855;DB06856;DB03046;DB04059;DB04172;DB00594;DB03127;DB02526;DB03159;DB05254;DB03782;DB06857;DB16701;DB03876;DB03476;	missense_variant	MODERATE	PLAU
chr10:73912301:G:A	a	g	-1.746	0.2154	-15.29	--	0	0.028	1	0.8672	X7144.234	Kazal-type serine protease inhibitor domain-containing protein 1	101061989	10	10	73912301	trans	0.00571709		KAZALD1	Q96I82	-1.76764	11.6209	-1.68604	4.25968	-2.20133	7.96e-09	-1.5446	0.000129441	-2.50904	1.82156		missense_variant	MODERATE	PLAU
chr10:75070006:T:C	t	c	0.1837	0.0303	-8.89	++	66.5	2.984	1	0.08408	X23323.25	Dual specificity phosphatase DUPD1	75037472	10	10	75070006	cis	0.362221	rs1972997	DUPD1	Q68J44	0.242395	6.90941	0.137133	3.1357	0.175089	0.000903337	0.162309	0.00101144	NA	NA		intron_variant	MODIFIER	DUSP29
chr10:75094205:TATGAGGAGGACAAG:T	t	tatgaggaggacaag	-0.1461	0.025	-8.27	--	1.5	1.015	1	0.3137	X6525.17	Dual specificity protein phosphatase 13 isoform A	75094432	10	10	75094205	cis	0.411329	rs66581278	DUSP13	Q6B8I1	-0.124512	3.78084	-0.175585	5.27617	-0.112925	0.0203353	-0.192514	1.11e-05	-0.289581	1.60462		missense_variant	MODERATE	DUSP13
chr10:7533296:C:CG	cg	c	-0.2282	0.0257	-18.23	--	72.1	3.585	1	0.0583	X14294.61	Methyl-CpG-binding domain protein 1	50266882	18	10	7533296	trans	0.338268	rs78551439	MBD1	Q9UIS9	-0.271045	14.563	-0.173139	5.05743	-0.166307	0.00146267	-0.204177	1.68e-05	-0.265814	1.52018		splice_polypyrimidine_tract_variant,intron_variant,non_coding_transcript_variant	LOW	-
chr10:7533296:C:CG	cg	c	-0.2286	0.0257	-18.19	--	0	0.953	1	0.329	X7886.26	Serine palmitoyltransferase 1	92000087	9	10	7533296	trans	0.338268	rs78551439	SPTLC1	O15269	-0.209549	9.94185	-0.261698	9.05149	-0.258634	8.61e-07	-0.310878	2.49e-12	-0.151992	0.629792	DB00114;DB00133;	splice_polypyrimidine_tract_variant,intron_variant,non_coding_transcript_variant	LOW	-
chr10:7533296:C:CG	cg	c	-0.2851	0.0255	-28.33	--	0	0.742	1	0.389	X8233.2	Inter-alpha-trypsin inhibitor heavy chain H5	7559270	10	10	7533296	cis	0.338268	rs78551439	ITIH5	Q86UX2	-0.269191	16.6271	-0.315413	12.3137	-0.291772	8.34e-09	-0.350497	1.36e-14	-0.165734	0.730908		splice_polypyrimidine_tract_variant,intron_variant,non_coding_transcript_variant	LOW	-
chr10:7539573:A:C	a	c	0.3245	0.0299	-26.68	++	0	0.358	1	0.5494	X20195.13	Interferon-induced helicase C domain-containing protein 1	162267074	2	10	7539573	trans	0.342292	rs35639130	IFIH1	Q9BYX4	0.342887	14.5921	0.307045	12.4971	0.313551	1.55e-08	0.386546	3.16e-16	NA	NA		downstream_gene_variant	MODIFIER	-
chr10:7563115:T:TC	t	tc	-1.3693	0.1984	-11.29	--	0	0.457	1	0.4989	X9070.1	Uncharacterized protein C17orf67	56791913	17	10	7563115	trans	0.00557012	rs61199416	C17orf67	Q0P5P2	-1.46364	8.71561	-1.17849	3.19685	-1.53074	1.4e-06	-1.25604	0.000514977	NA	NA		frameshift_variant	HIGH	ITIH5
chr10:7565338:A:G	a	g	0.3028	0.0332	-19.14	++	0	0.244	1	0.6215	X18411.83	ADP-ribosylation factor-like protein 15	53883942	5	10	7565338	trans	0.213389	rs10795553	ARL15	Q9NXU5	0.283968	7.64303	0.317042	11.973	0.255564	2.33e-05	0.340994	3.33e-11	0.462773	3.41547		intron_variant	MODIFIER	ITIH5
chr10:7580046:G:A	a	g	0.2845	0.0405	-11.66	++	30.3	1.435	1	0.231	X10048.7	Core-binding factor subunit beta	67028984	16	10	7580046	trans	0.0997747	rs41298373	CBFB	Q13951	0.322167	9.45449	0.221994	3.1421	0.272048	0.00115574	0.197048	0.00567211	0.253827	0.830101		missense_variant	MODERATE	ITIH5
[truncated: 2,256 more rows]

## Sheet: Table S6
Table S6. Summary of significantly-enriched pathways for all proteins with a pQTL association.
[truncated: 232 more rows]

[truncated: 40 more sheets: Table S7, Table S8, Table S9, Table S10, Table S11, Table S12, Table S13, Table S14, Table S15, Table S16, Table S17, Table S18, Table S19, Table S20, Table S21, Table S22, Table S23, Table S24, Table S25, Table S26 …]
