# Supplementary material for: Proteogenomic analysis of human cerebrospinal fluid identifies neurologically relevant regulation and informs causal proteins for Alzheimer’s disease
Source: Research Square preprint supplement (doi:10.21203/rs.3.rs-2814616/v1), 2023-06-09
Supplement: Supplementary file 1 [file ce84b4462c918730215b31c2.pdf]

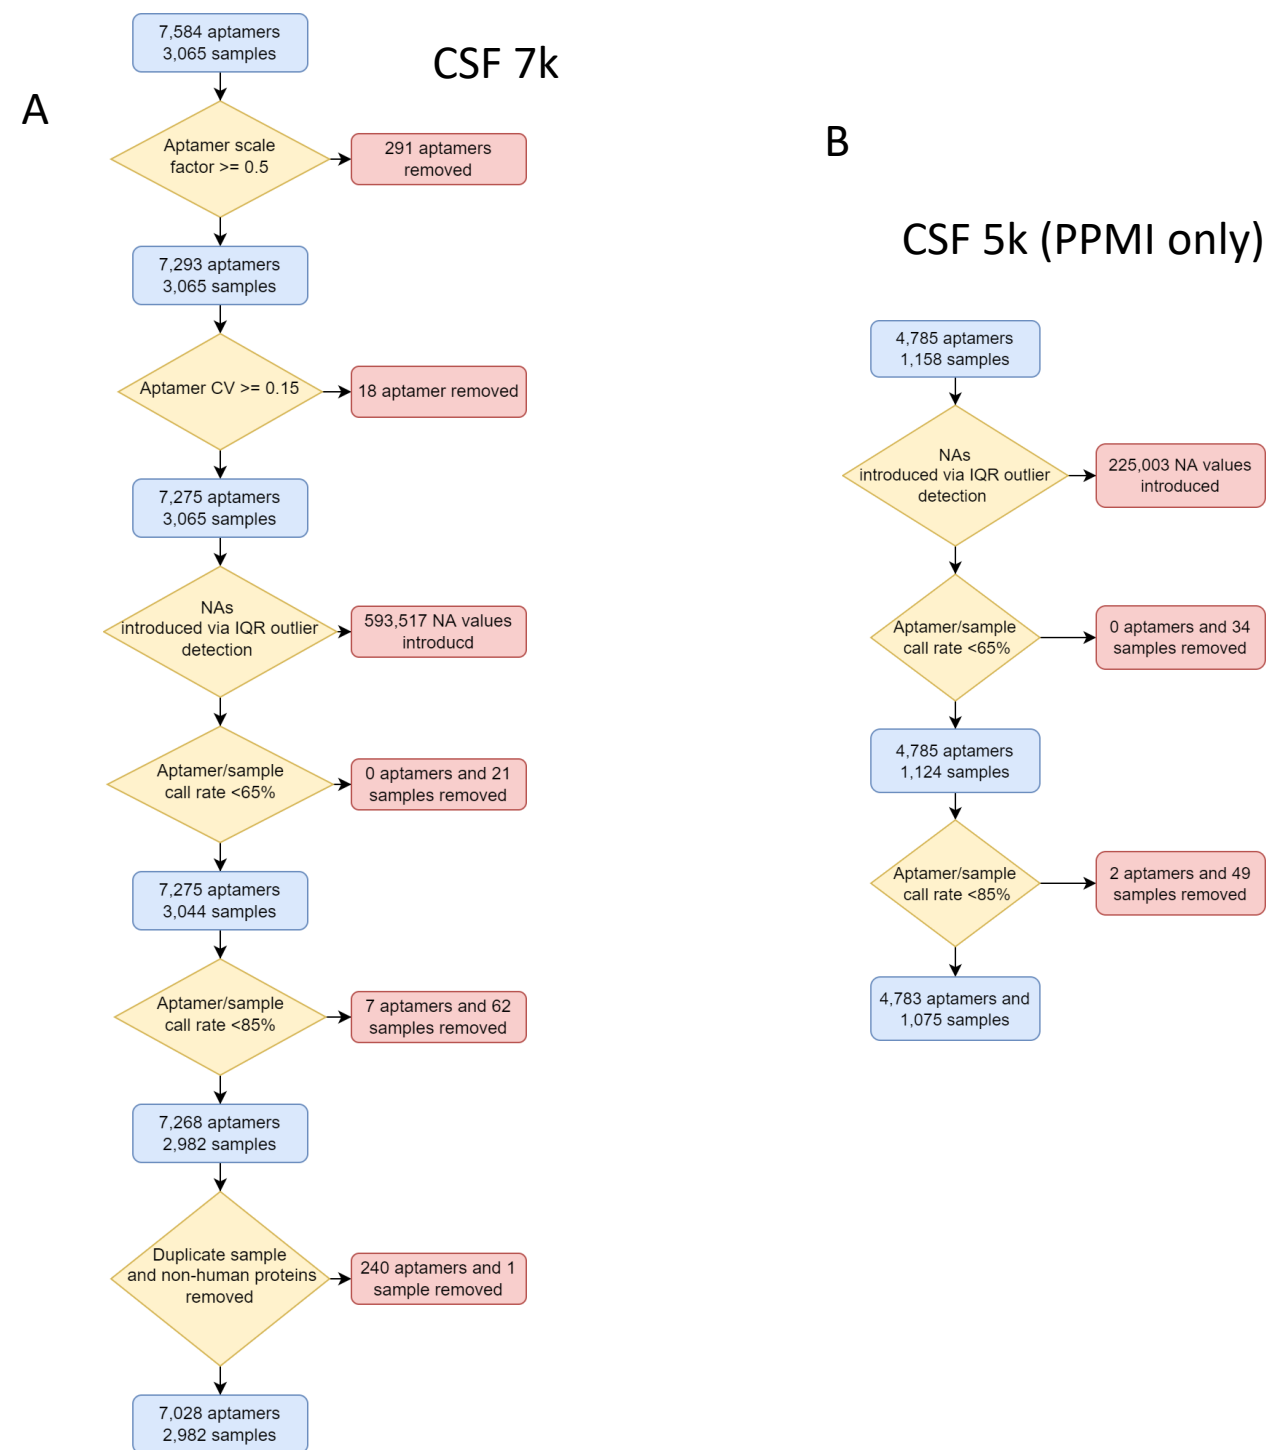

**Supplementary Figure 1: Proteomics QC. A.** Quality control steps for all samples and aptamers measured using the SOMAscan7k platform. **B.** Quality control steps for all samples and aptamers measured using the SOMAscan5k platform. CV: coefficient of variation; IQR: interquartile range.

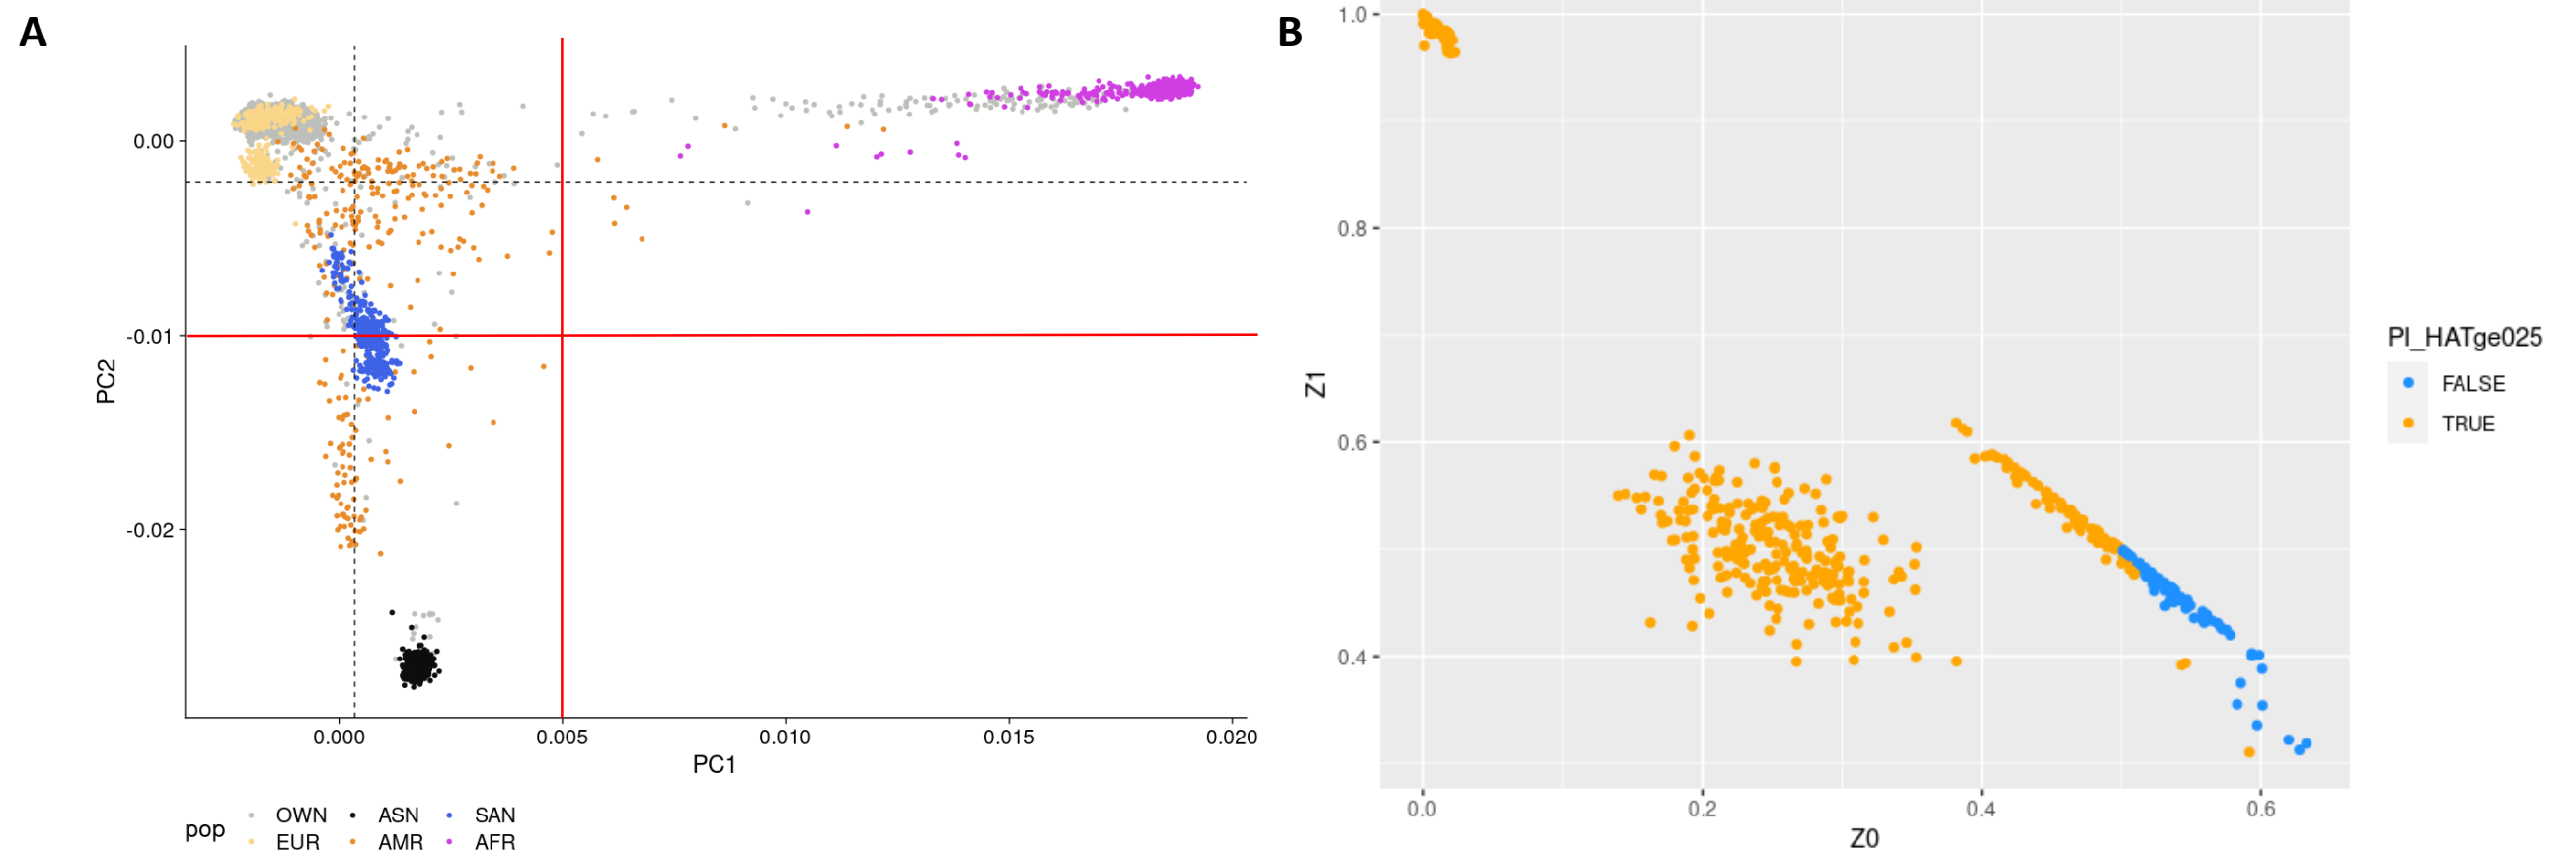

**Supplementary Figure 2: GWAS Data QC. A.** Scatter plot of the first two genetic principal components for our samples. We first used broad filtering (red lines,  $PC1 < 0.005$ ,  $PC2 > -0.01$ ) then from the remaining samples calculated the standard deviation (SD) and kept all samples within 3 SD of the mean (dashed lines), corresponding to non-Hispanic white samples. **B.** Scatter plot of relatedness as determined by IBD. Orange dots correspond to pairs with  $PI\_HAT \geq 0.25$ ; one from each of these pairs was removed.

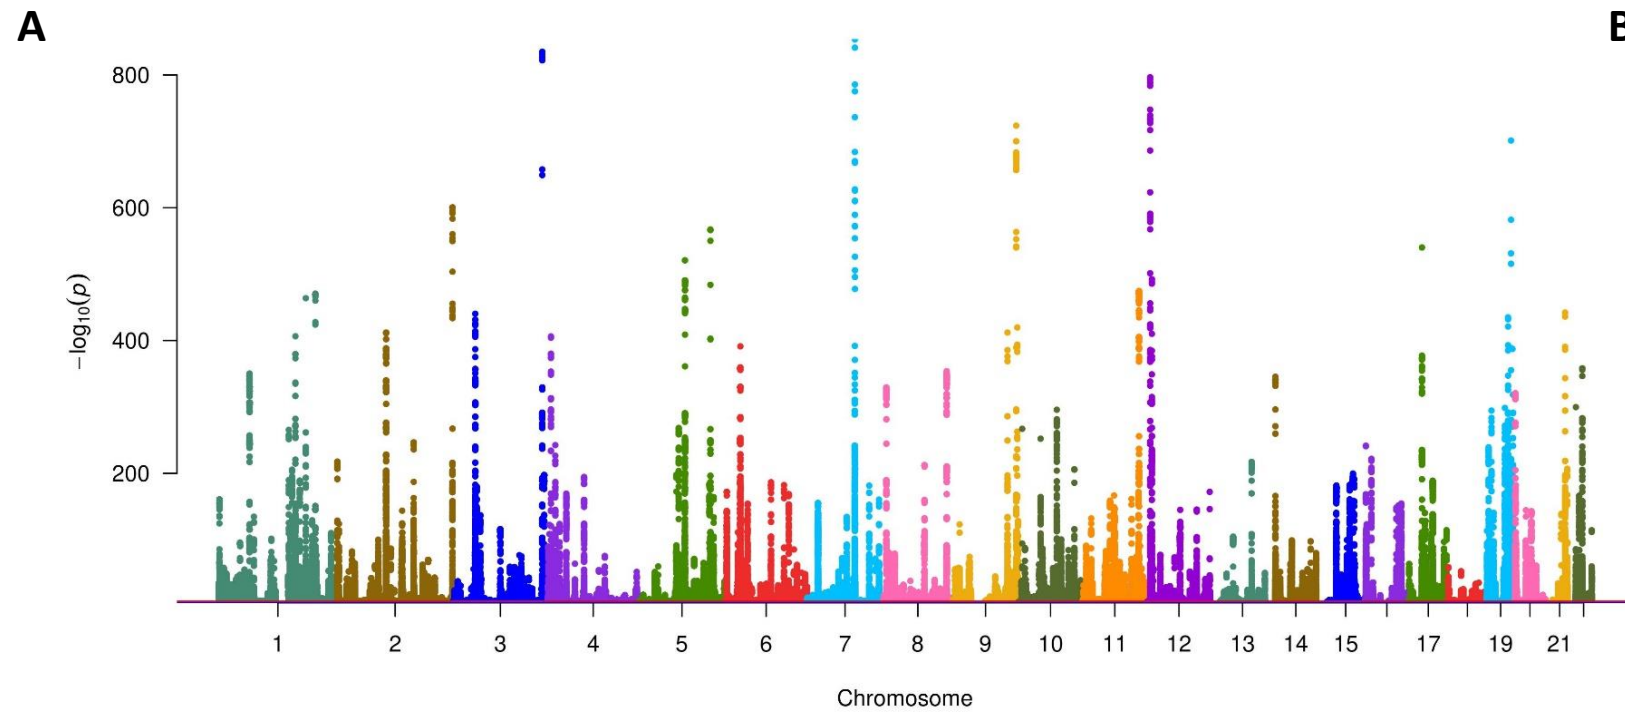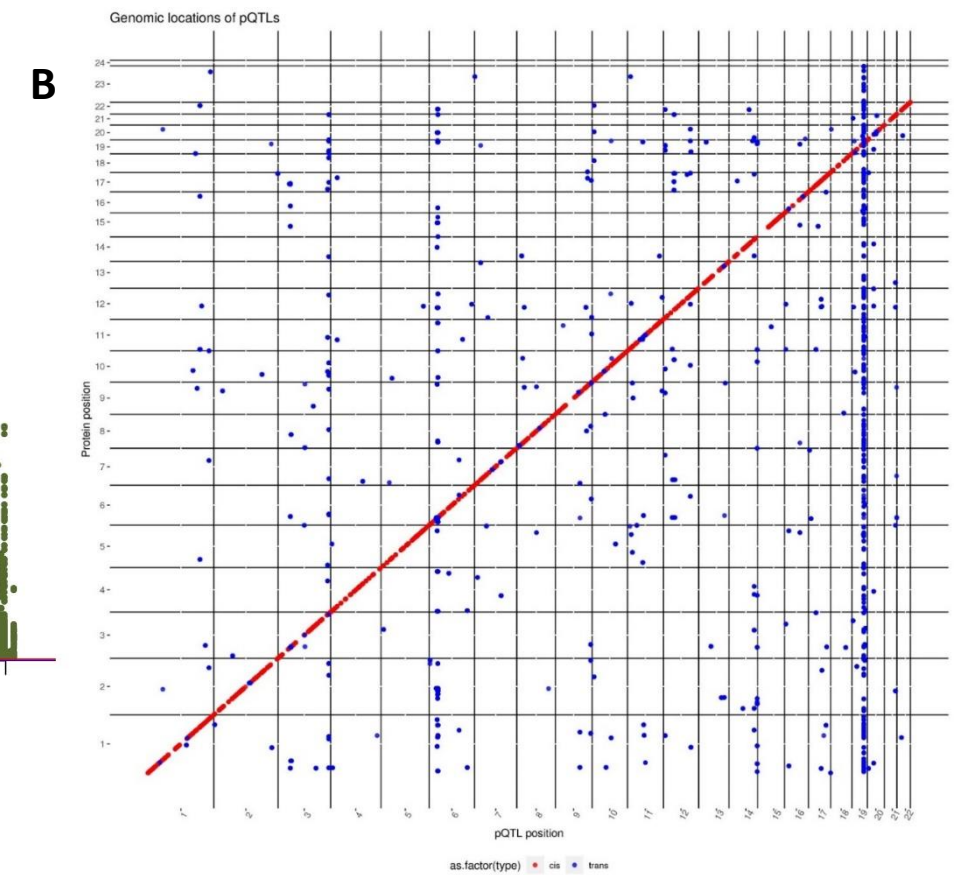

**Supplementary Figure 3: Discovery-specific analyses.** **A.** Combined Manhattan plot showing the pQTL results from the discovery analysis of 1,912 individuals and 7,559 aptamers. X-axis: genomic position of each variant; y-axis:  $-\log_{10}(\text{P-value})$  of association between a variant and aptamer level. **B.** 2D Manhattan plot showing the pQTL results from the discovery analysis. X-axis: location of the index pQTL variant for each association; y-axis: location of the gene encoding the protein associated with each genetic variant. Colors represent *cis* (red) and *trans* (blue) associations.

**A**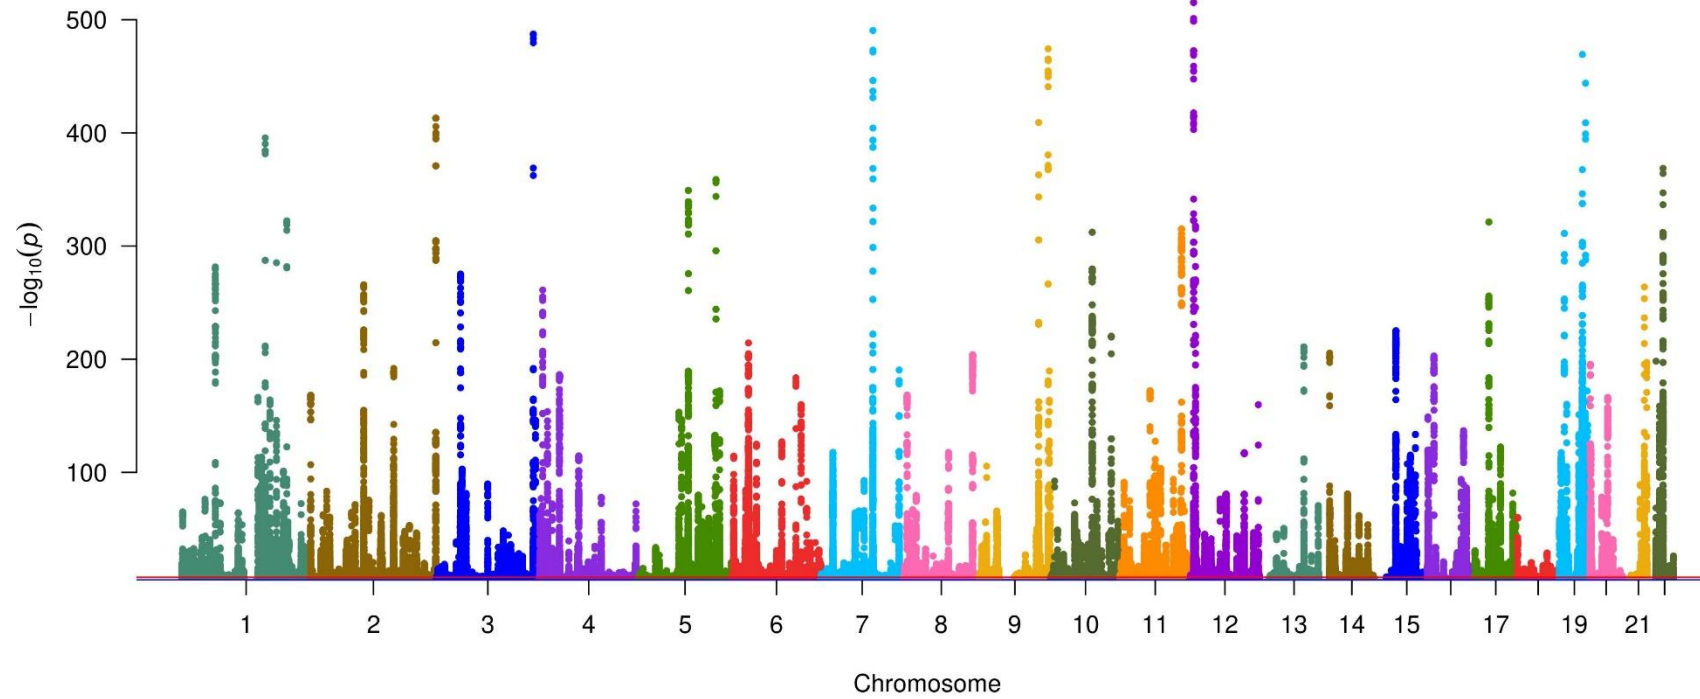**B**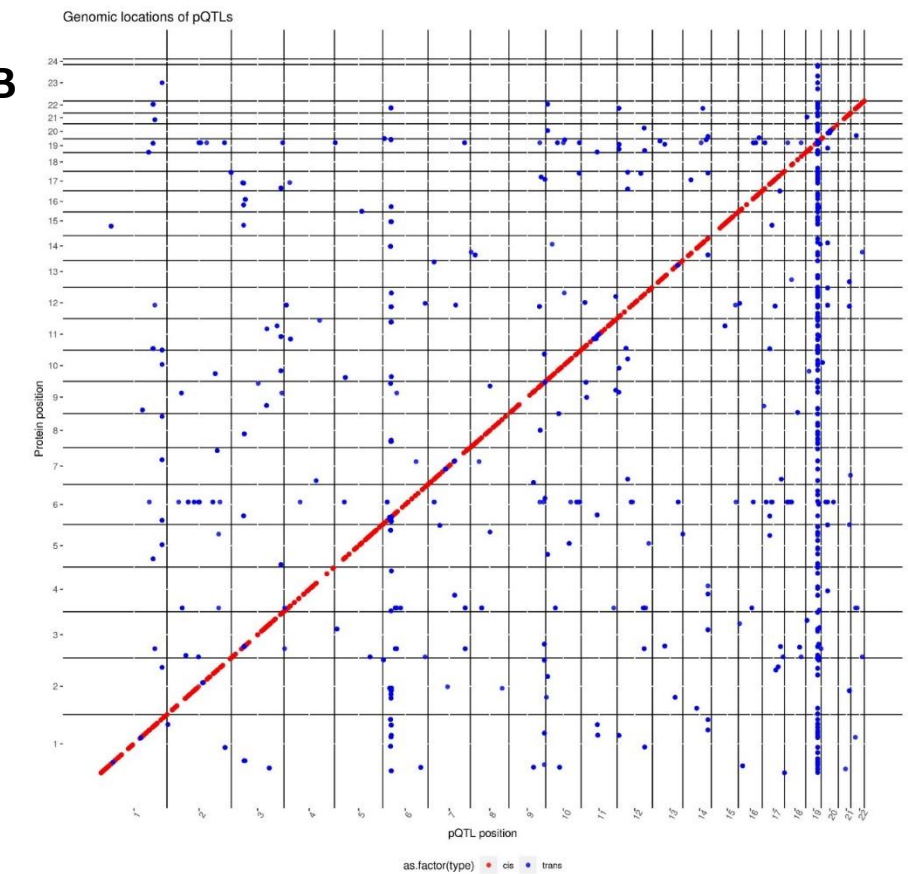

**Supplementary Figure 4: Replication-specific analyses.** **A.** Combined Manhattan plot showing the pQTL results from the replication analysis of 1,195 individuals and 7,028 aptamers. X-axis: genomic position of each variant; y-axis:  $-\log_{10}(P\text{-value})$  of association between a variant and aptamer level. **B.** 2D Manhattan plot showing the pQTL results from the replication analysis. X-axis: location of the index pQTL variant for each association; y-axis: location of the gene encoding the protein associated with each genetic variant. Colors represent *cis* (red) and *trans* (blue) associations.



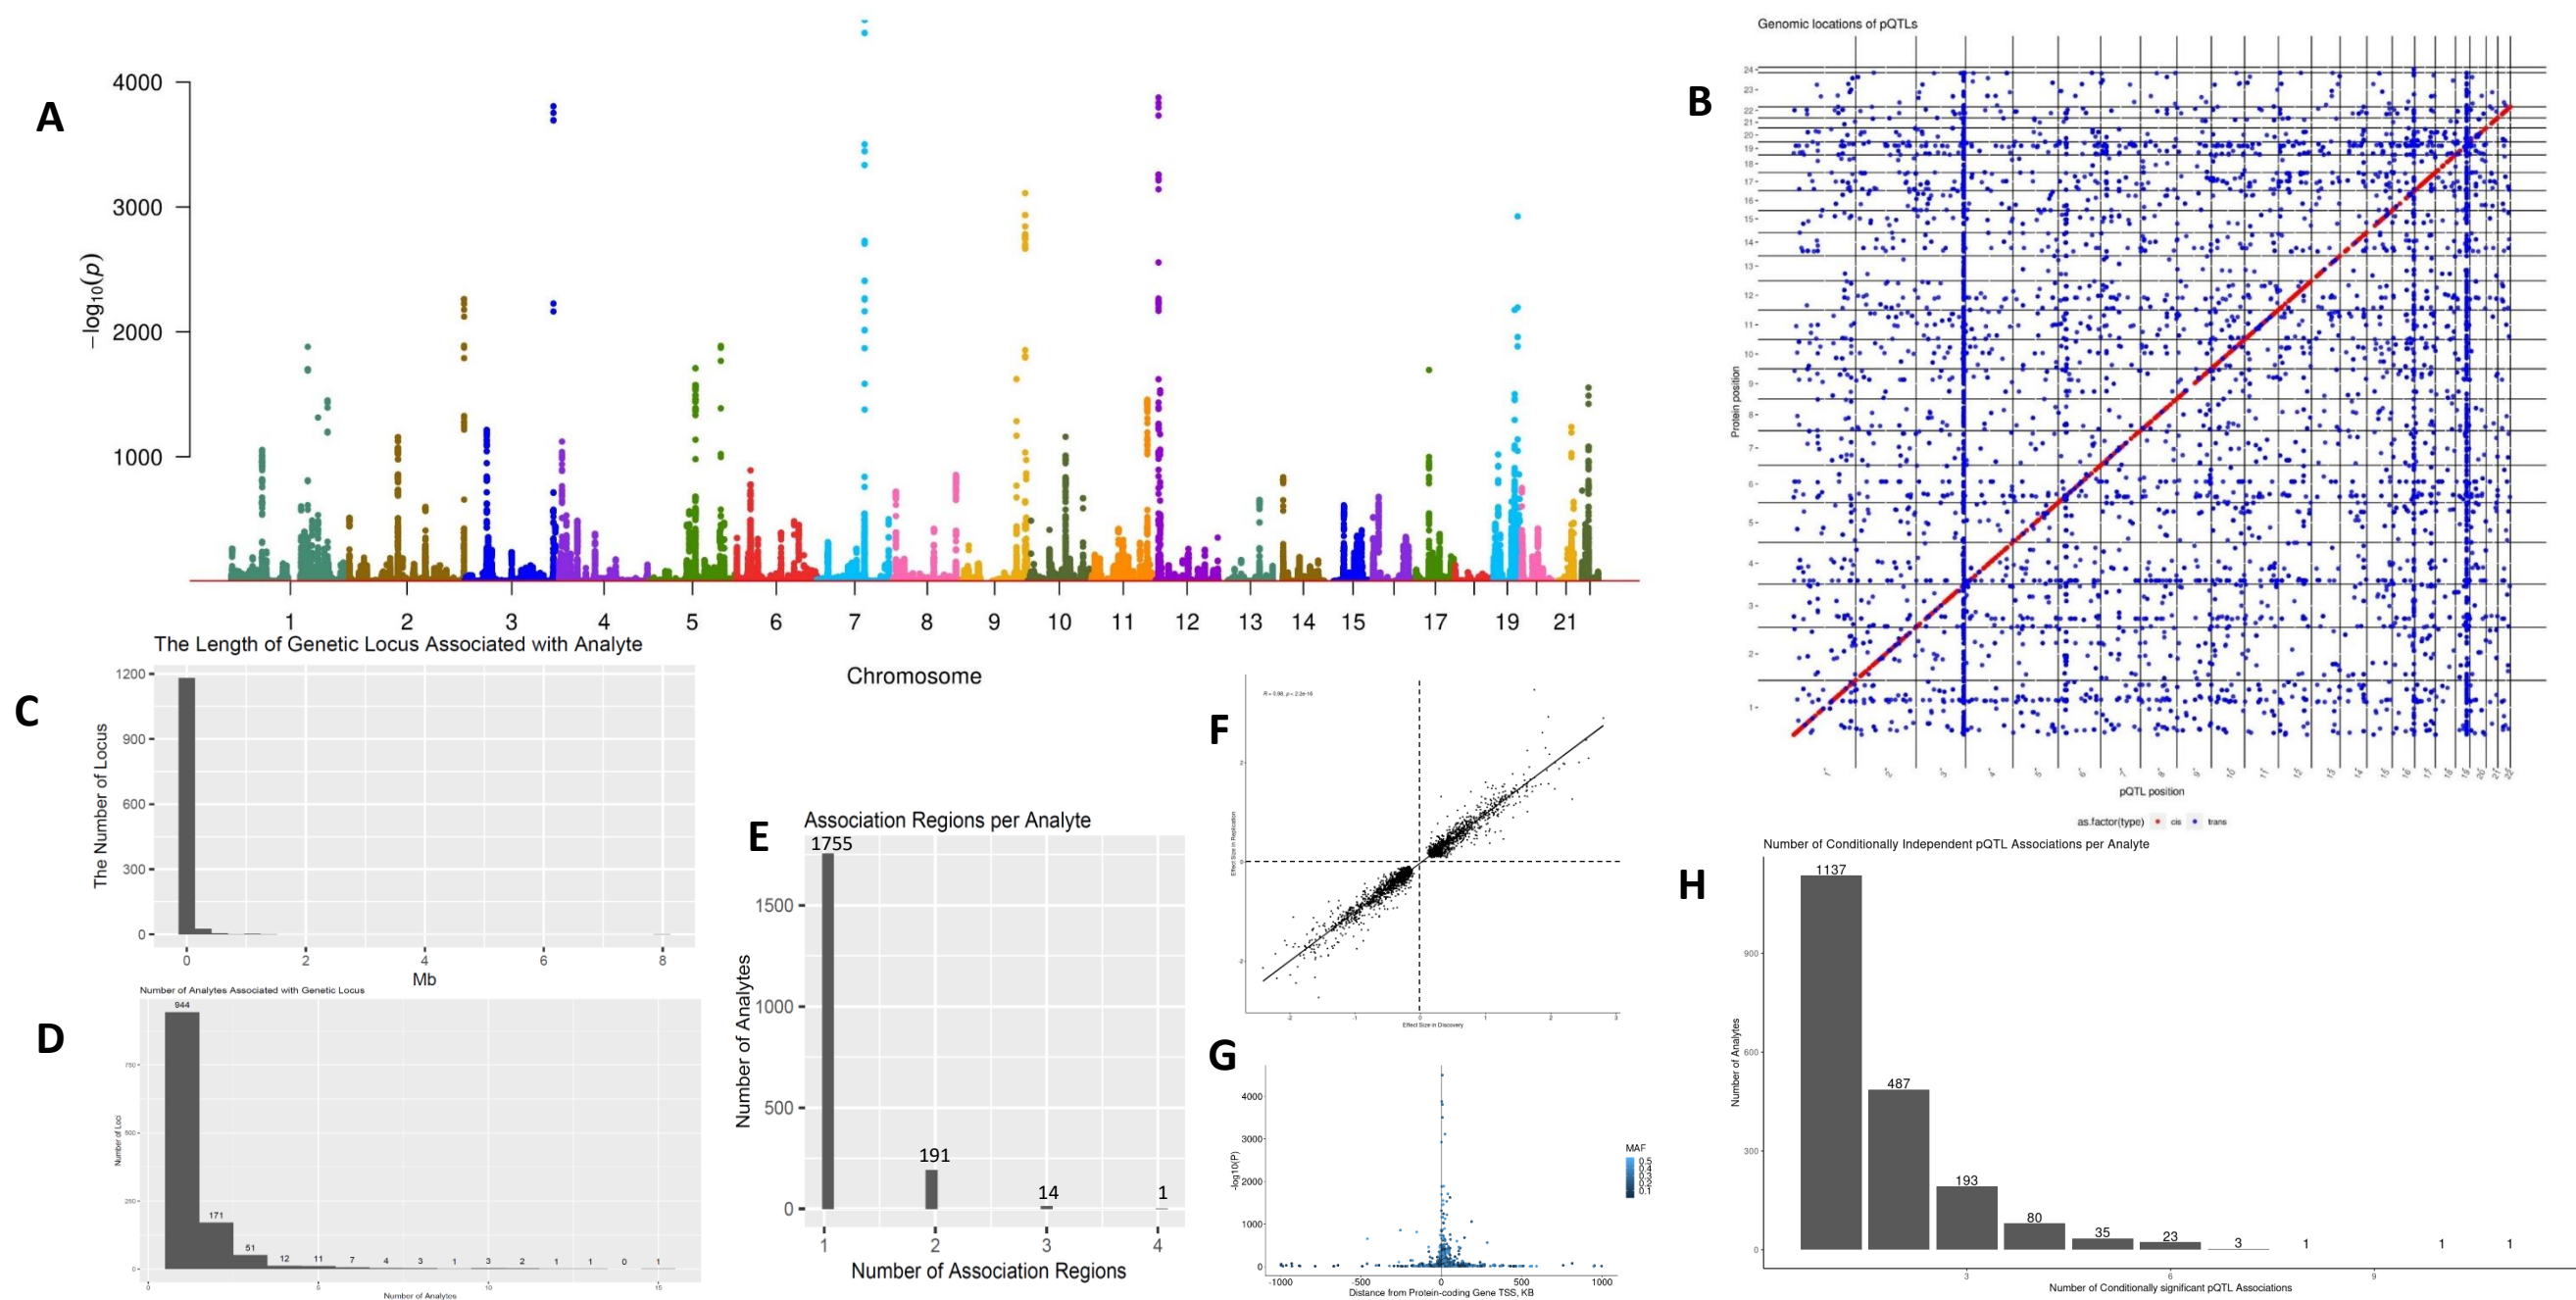

**Supplementary Figure 5: Meta-analysis secondary analyses.** **A.** Combined Manhattan plot showing the pQTL results from the meta-analysis of 3,107 total samples and 7,028 aptamers. X-axis: genomic position of genetic variants; y-axis:  $-\log_{10}(P\text{-value})$  for the association between a genetic variant and the levels of an aptamer. **B.** 2D Manhattan plot showing the all genome-wide significant associations in the meta-analysis ( $P < 5 \times 10^{-8}$ ). X-axis: genomic position of genetic variants associated with protein levels, split by chromosome; y-axis: genomic position of the gene encoding each protein. Colors represent *cis* associations (red) and *trans* associations (blue). **C.** Histogram showing the length of each pQTL region, representing the distance in megabases between the two variants denoting the end of a region. The regions were determined through LD ( $R^2 > 0.1$ ) between index pQTL variants across all proteins. **D.** Histogram showing the number of aptamers associated with each pQTL region. Three regions with high pleiotropy (number of regulated aptamers = 74, 136, 337) are excluded here but discussed in detail in the main text. **E.** Number of unique index pQTL associations per aptamer. Aptamers with more than one association region have multiple index variants in different genomic regions. **F.** Correlation of 2,316 index pQTL variants in discovery (x-axis;  $N = 1,912$ ) and replication (y-axis,  $N = 1,195$ ) analyses. Pearson correlation is reported. Color corresponds to minor allele frequency at the variant (darker = less common). **G.** Scatter plot of *cis* index pQTL variant p-values with distance from the corresponding protein-coding gene. Color corresponds to minor allele frequency (darker = less common). **H.** Histogram of the number of conditionally independent pQTL associations per aptamer (minimum 1) as determined by GCTA-COJO.

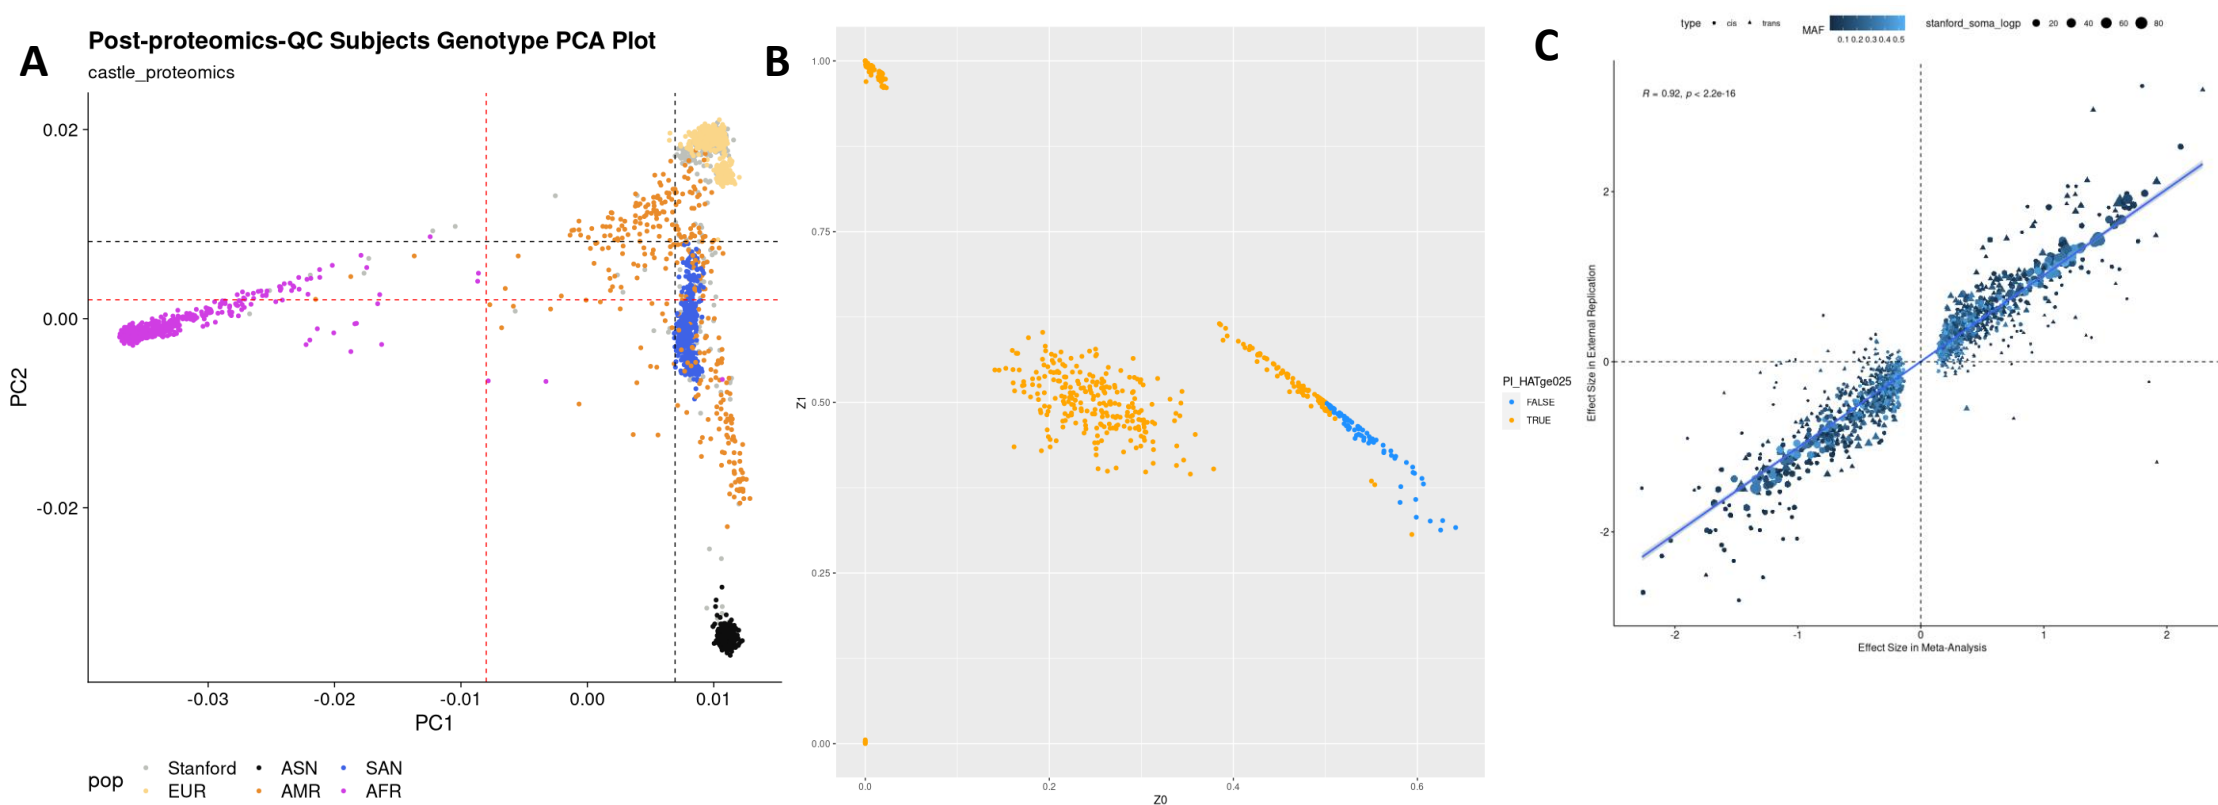

**Supplementary Figure 6: Replication in external dataset (Stanford-ADRC, Wagner).** **A.** Scatter plot of the first two genetic principal components for external replication samples using 1000 Genomes as the anchor. We first used broad filtering (dashed red lines,  $PC1 > -0.008$ ,  $PC2 > 0.002$ ) then from the remaining samples calculated the standard deviation (SD) and kept all samples within 3 SD of the mean (dashed black lines), corresponding to non-Hispanic white samples. **B.** Scatter plot of relatedness of samples between the 3,107 samples used for discovery & replication and external replication. For all pairs containing a sample from the external replication, that sample was preferentially removed. After PCA & IBD filtering, 460 genomic samples were kept. **C.** Correlation of effect sizes of index pQTL variants between the meta-analysis (x-axis,  $N = 3,107$ ) and external replication (y-axis,  $N = 183$ ). Pearson correlation was calculated. Index variants (individual points) are colored by their MAF as obtained from the 3,107 samples. Shape corresponds to *cis* or *trans* variant status (*cis*, circle; *trans*, triangle). Point size corresponds to the  $-\log_{10}(P)$  for the variant-protein association in the external dataset.

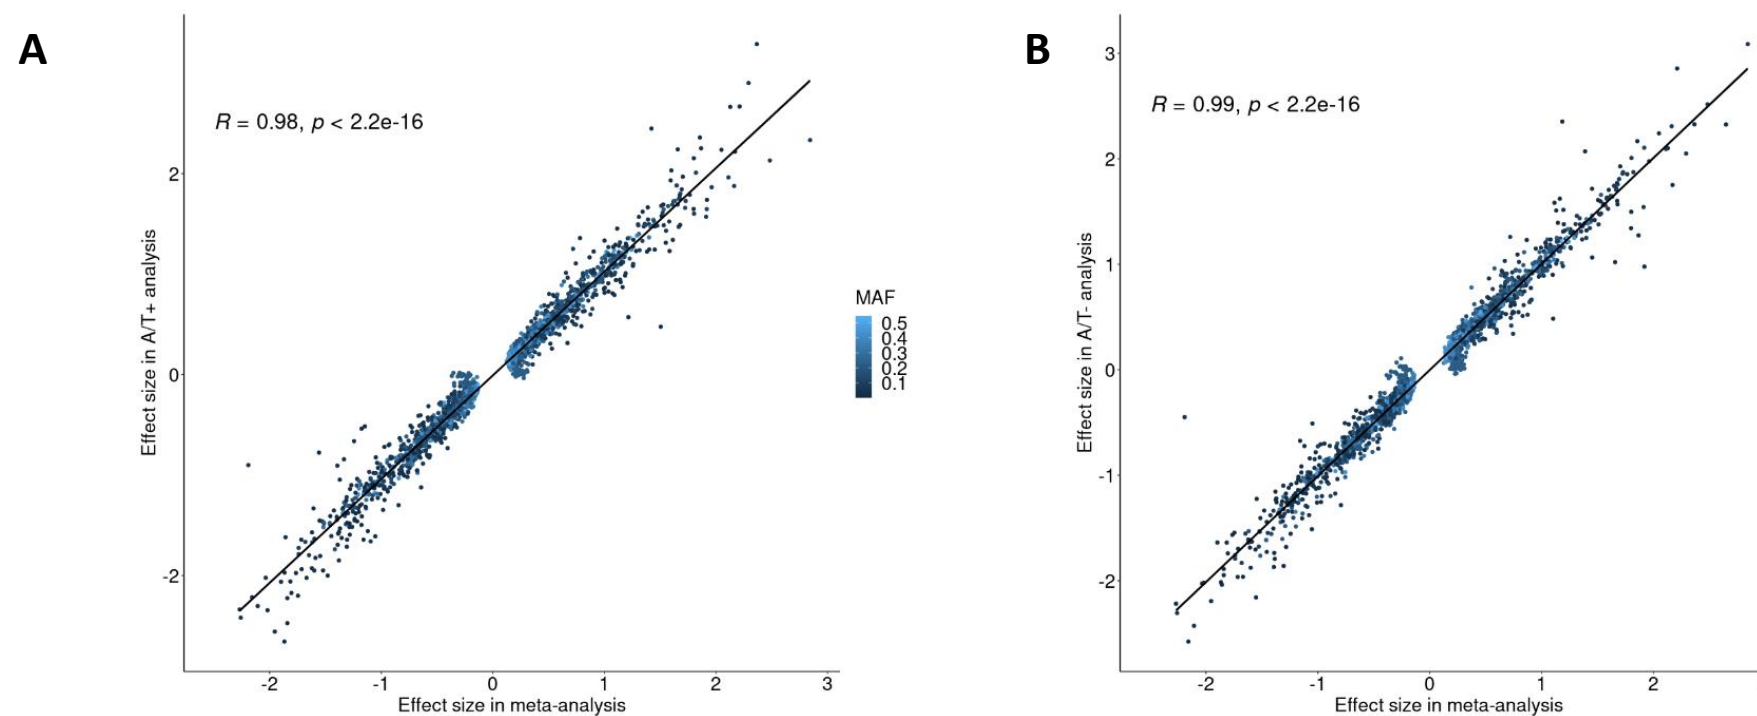

**Supplementary Figure 7: Disease-specific analyses. A.** Correlation of effect sizes for meta-analysis index pQTL variants in meta-analysis (x-axis, N = 3,107) and in CSF amyloid/tau positive individuals (y-axis, N = 775). Color represents minor allele frequency (darker = less common). **B.** Correlation of effect sizes for meta-analysis index pQTL variants in meta-analysis (x-axis, N = 3,107) and in CSF amyloid/tau negative individuals (y-axis, N = 889). Color represents minor allele frequency (darker = less common).

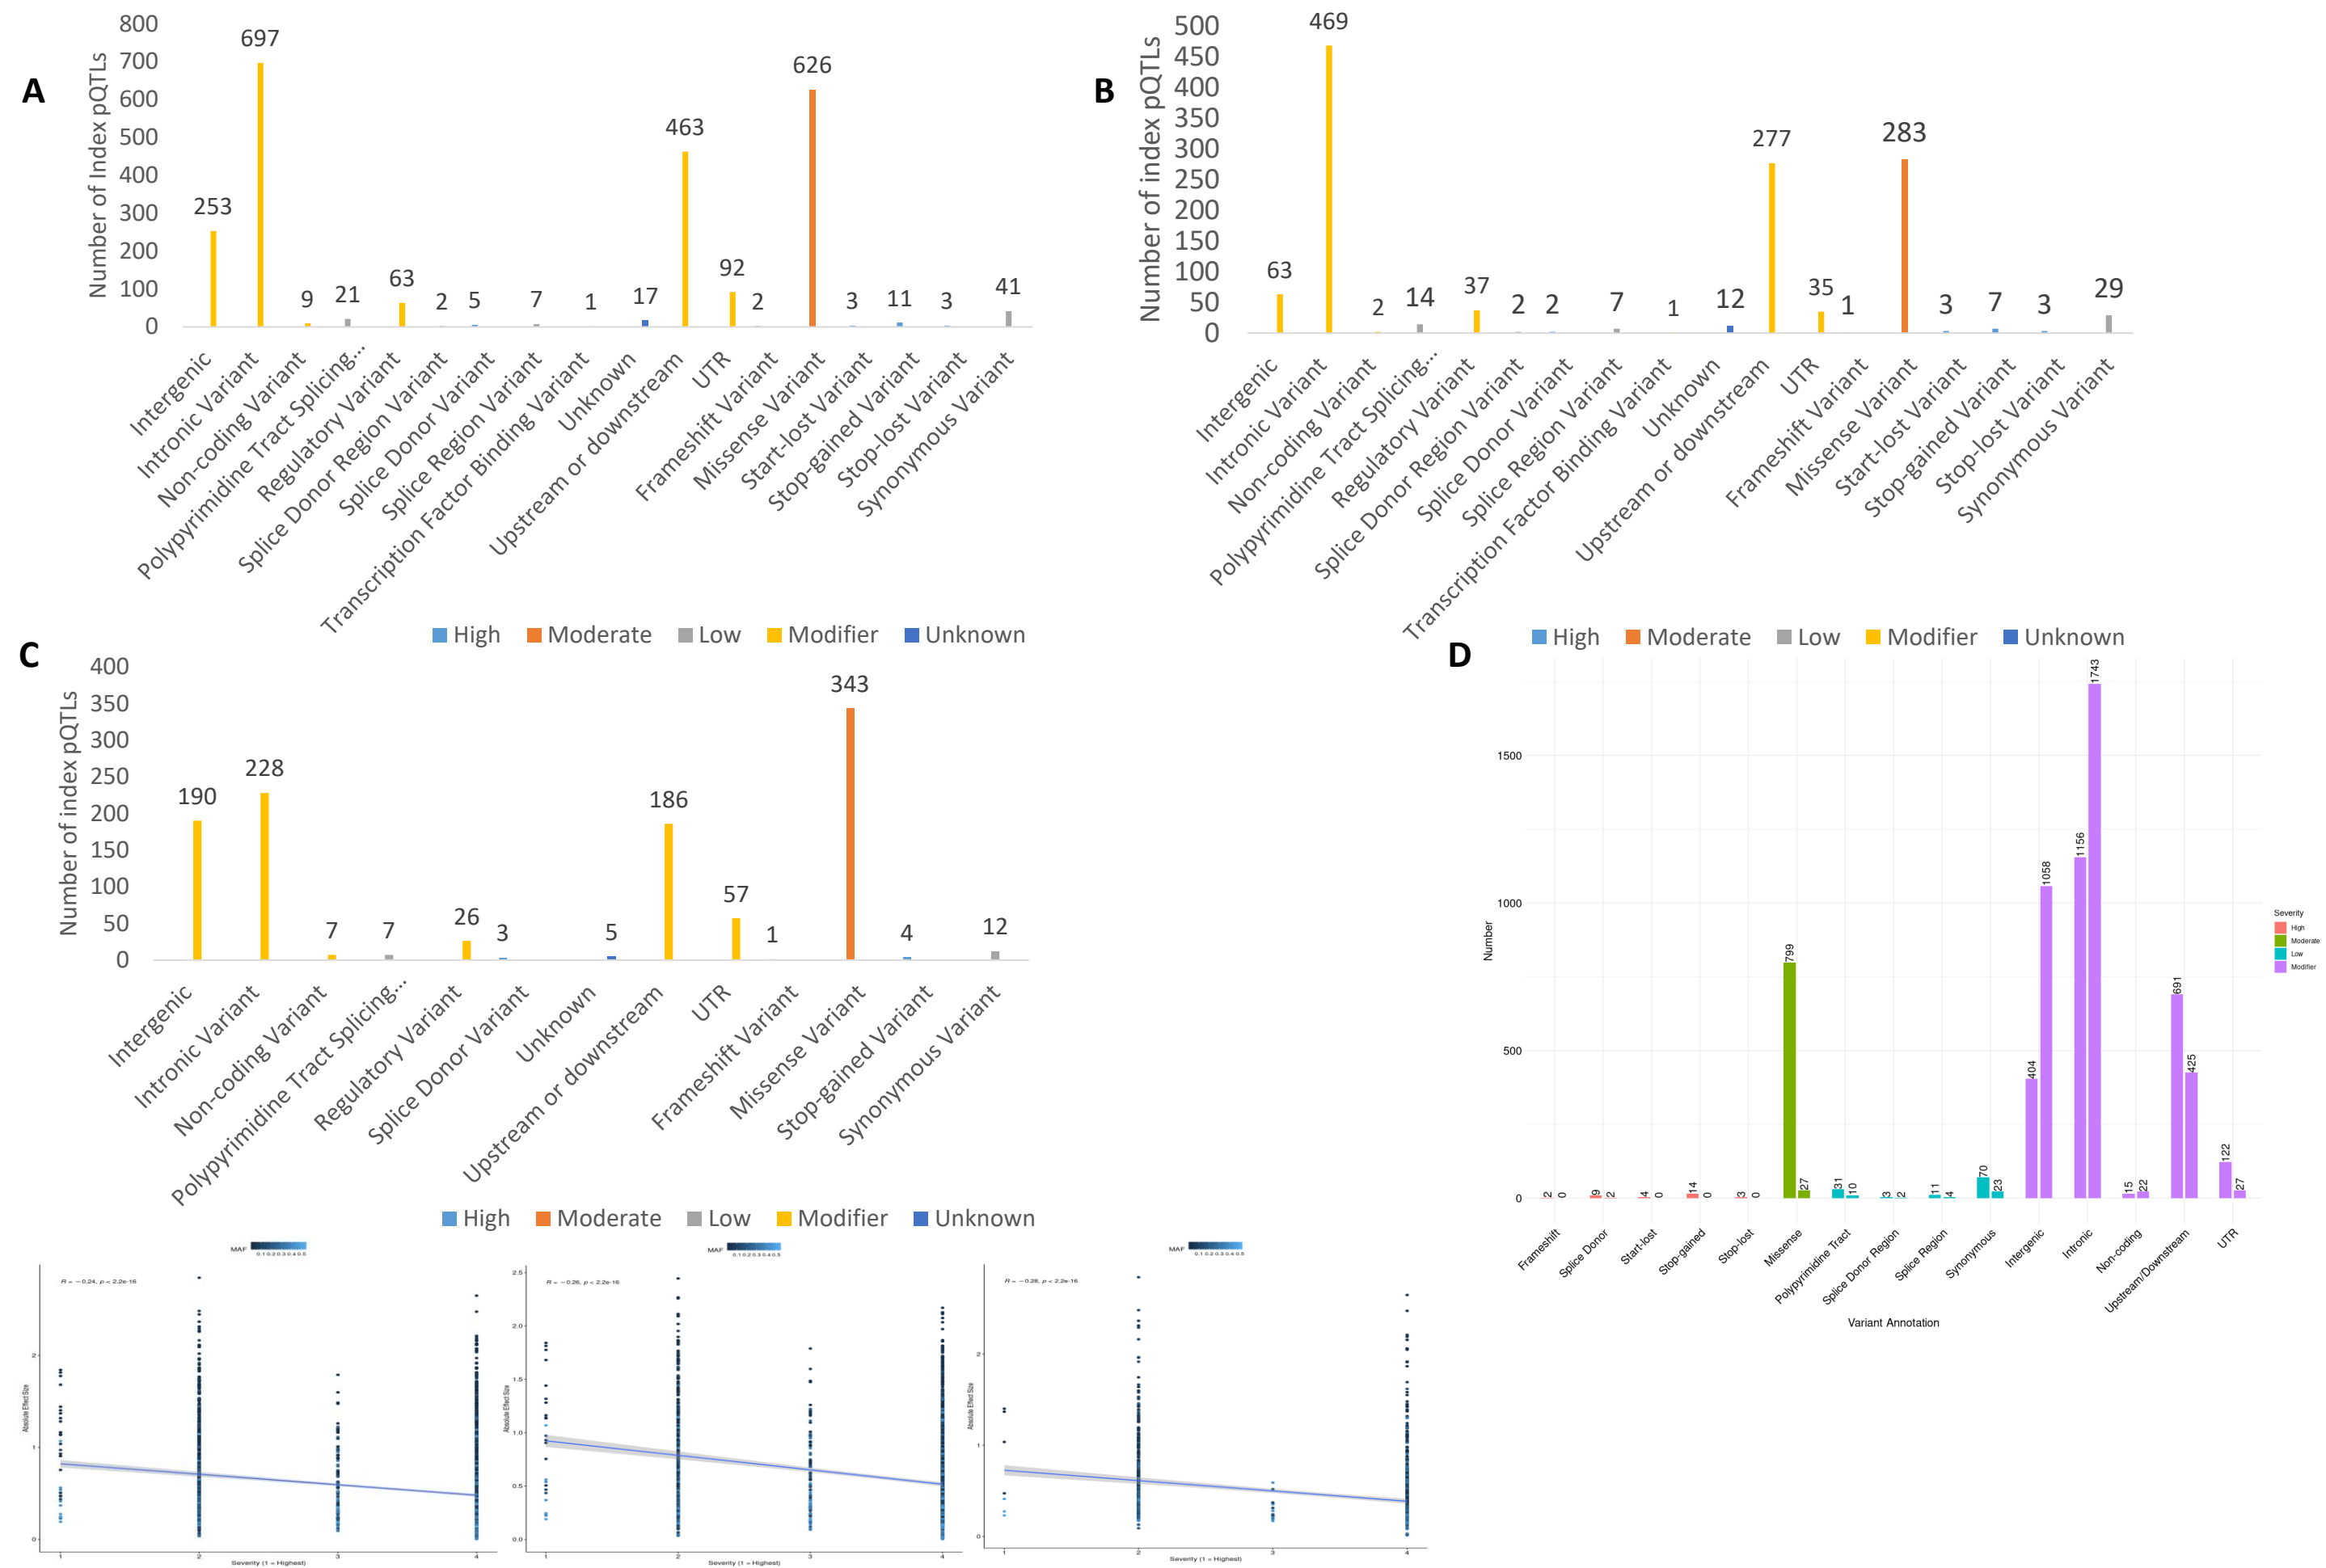

**Supplementary Figure 8: Meta-analysis pQTL variant annotation.** **A.** Variant annotation using VEP for all index pQTL variants, based on most severe annotation of any variant in LD ( $R^2 > 0.8$ ). **B.** Variant annotation using VEP for all *cis* index pQTL variants. **C.** Variant annotation using VEP for all *trans* index pQTL variants. **D.** Variant annotation using VEP for all significant conditionally independent pQTL variants. **E.** Pearson correlation of absolute effect size of each conditionally independent pQTL variant with annotation severity from VEP. **F.** Pearson correlation of absolute effect size of each *cis* conditionally independent pQTL variant with annotation severity from VEP. **G.** Pearson correlation of absolute effect size of each *trans* conditionally independent pQTL variant with annotation severity from VEP.



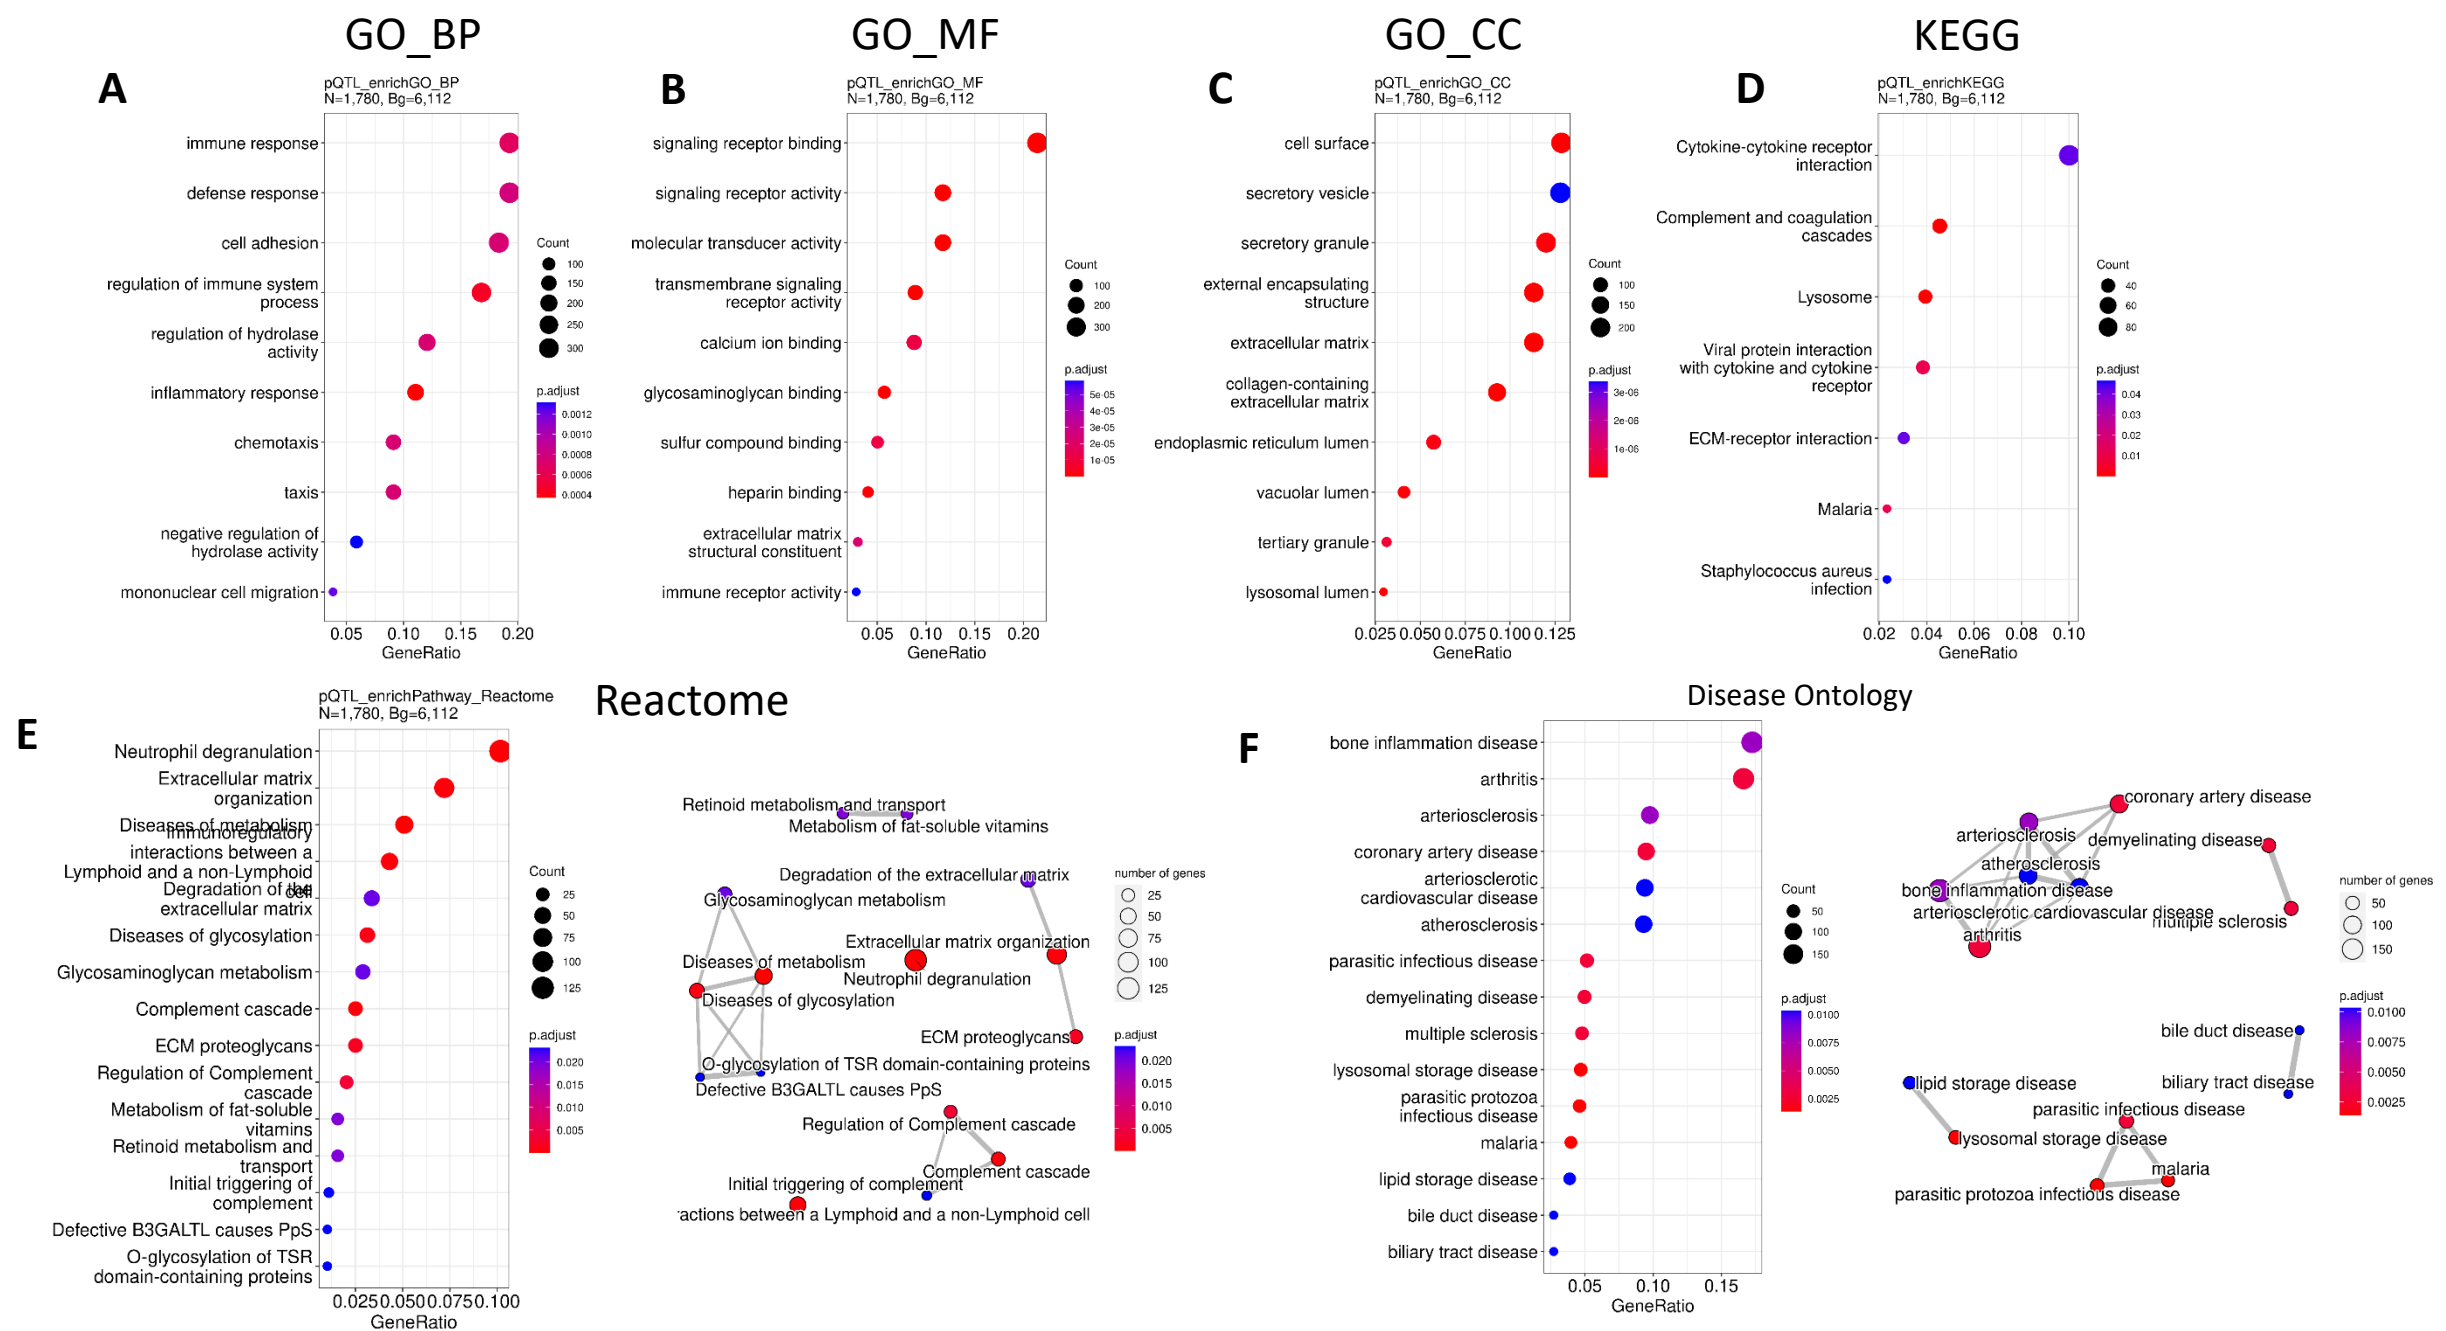

**Supplementary Figure 9: Pathway enrichment analysis of all proteins with a significant QTL. A.** Top enriched pathways for proteins with a pQTL compared to the full SOMAscan7k panel in Gene Ontology’s biological processes. **B.** Top enriched pathways in Gene Ontology’s molecular functions. **C.** Top enriched pathways in Gene Ontology’s cellular components. **D.** Top enriched pathways in KEGG. **E.** Top enriched pathways and enrichment map from Reactome. **F.** Top enriched pathways and enrichment map from Disease Ontology.

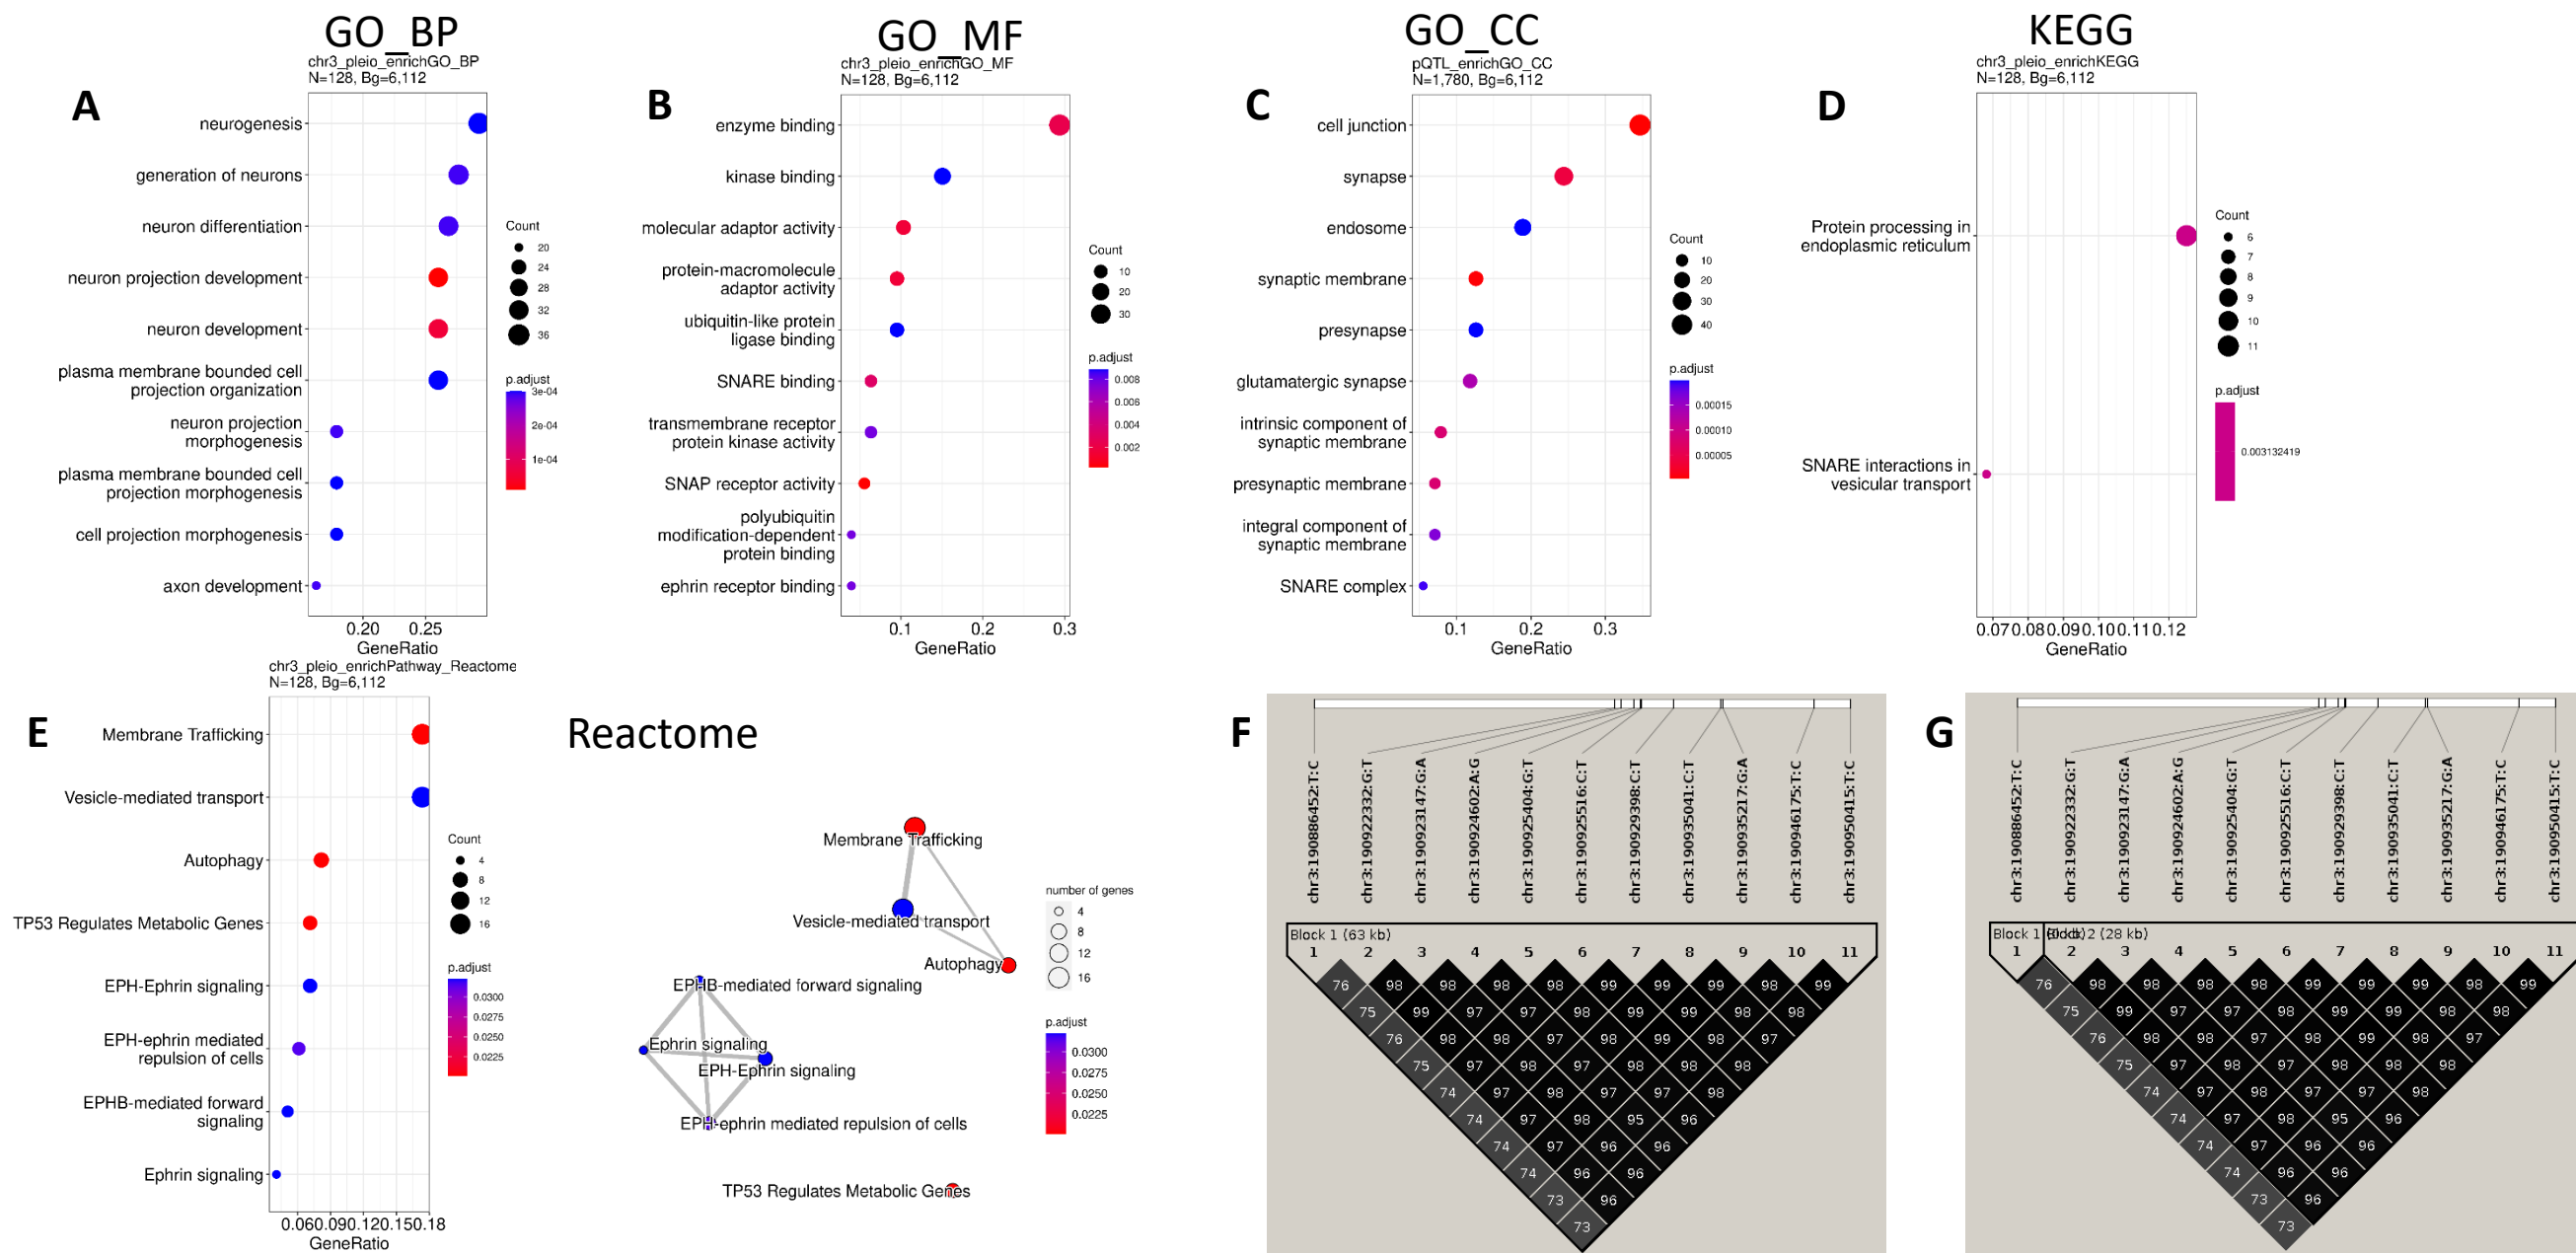

**Supplementary figure 10: Pathway enrichment analysis of all proteins with a pQTL in the chromosome 3 pleiotropic region and Haploview plot of index pQTL variants in the region. A.** Top enriched pathways for proteins with a pQTL in the chr3 pleiotropic region compared to the full SOMAscan7k panel in Gene Ontology's biological processes. **B.** Top enriched pathways in Gene Ontology's molecular functions. **C.** Top enriched pathways in Gene Ontology's cellular components. **D.** Top enriched pathways in KEGG. **E.** Top enriched pathways and enrichment map from Reactome. **F.** Haploview plot showing  $R^2$  between index pQTL variants identified in this region. Blocks were defined using an  $R^2$  threshold of 0.5. **G.** Haploview plot showing  $R^2$  between index pQTL variants identified in this region. Blocks were defined using an  $R^2$  threshold of 0.8.

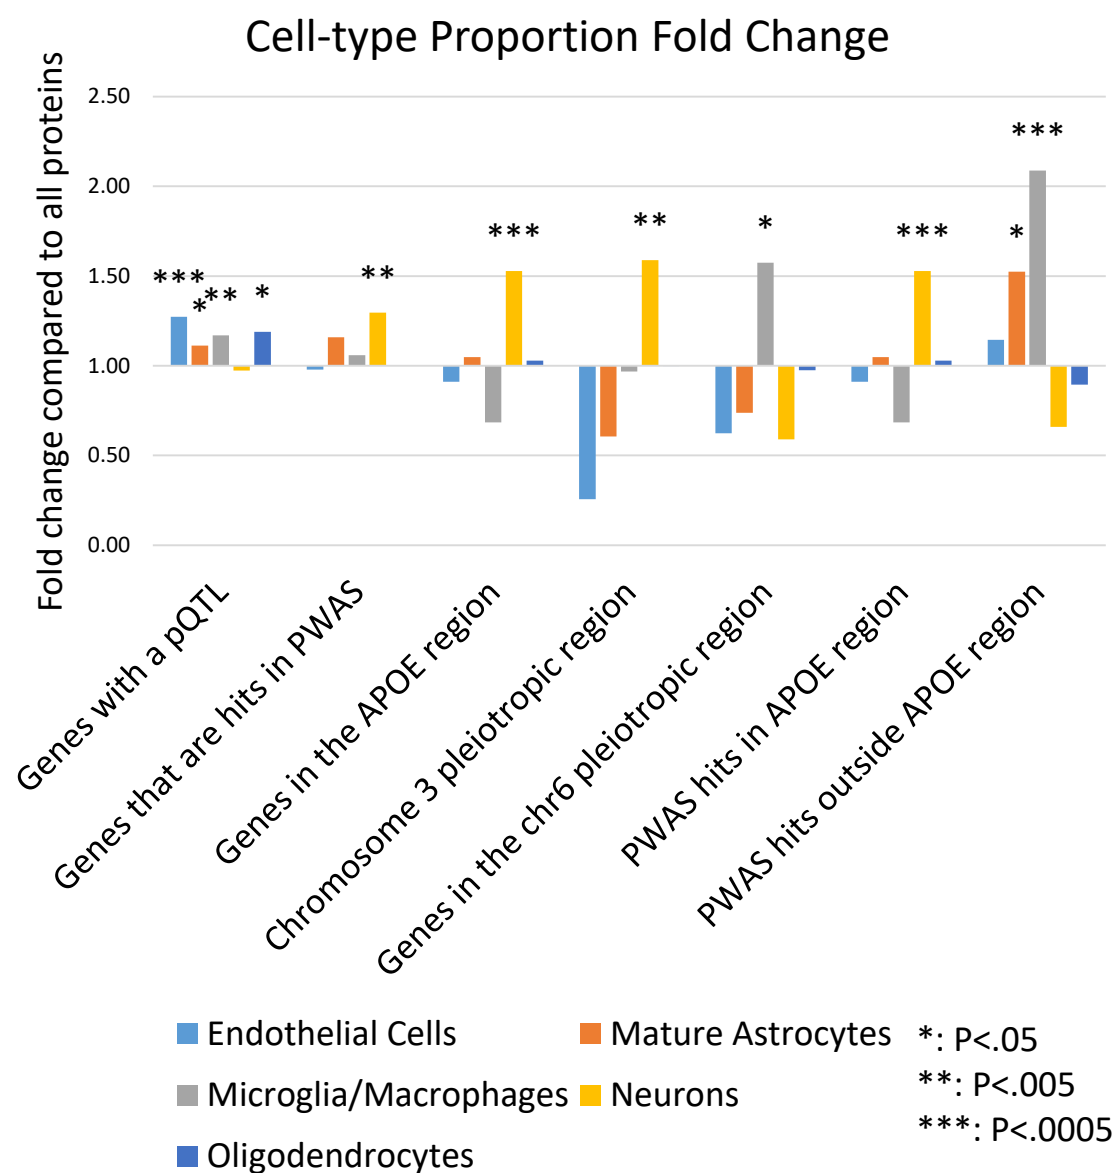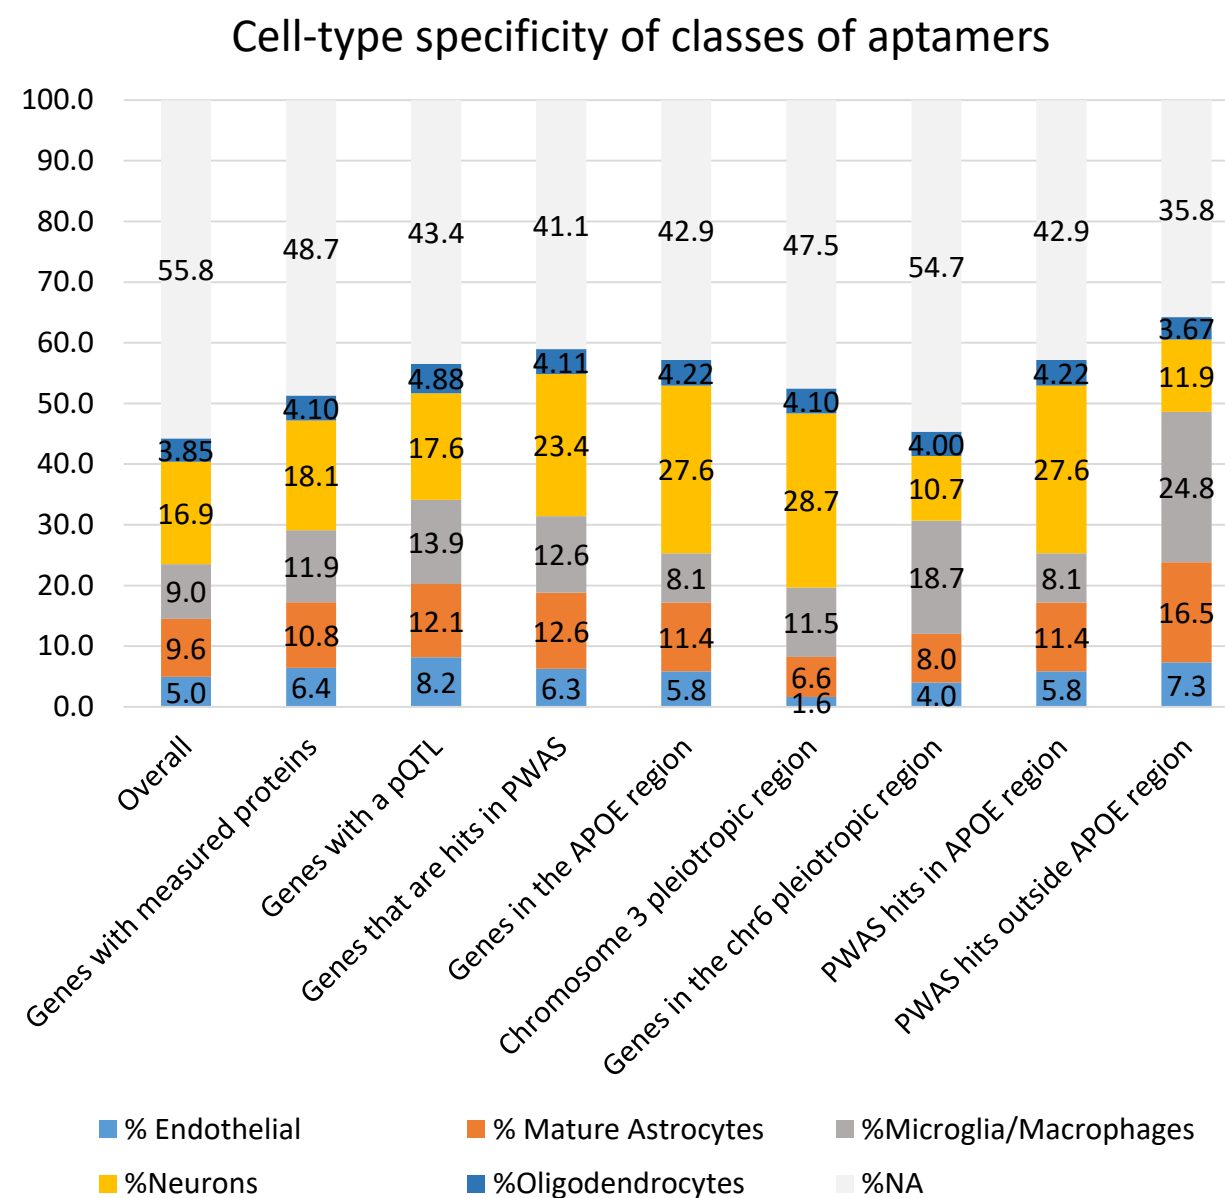

**Supplementary Figure 11: Summary of brain cell-type specificity analysis. A.** Cell-type enrichment fold change for subsets of proteins. All subsets were compared to the background set of genes whose proteins were measured in the SOMAscan7k panel. Fold change above 1: Enrichment for that cell type; fold change below 1: depletion for that cell type. P-values were calculated using the hypergeometric test. **B.** Percentage of each gene subset that is specific to each brain-relevant cell type.

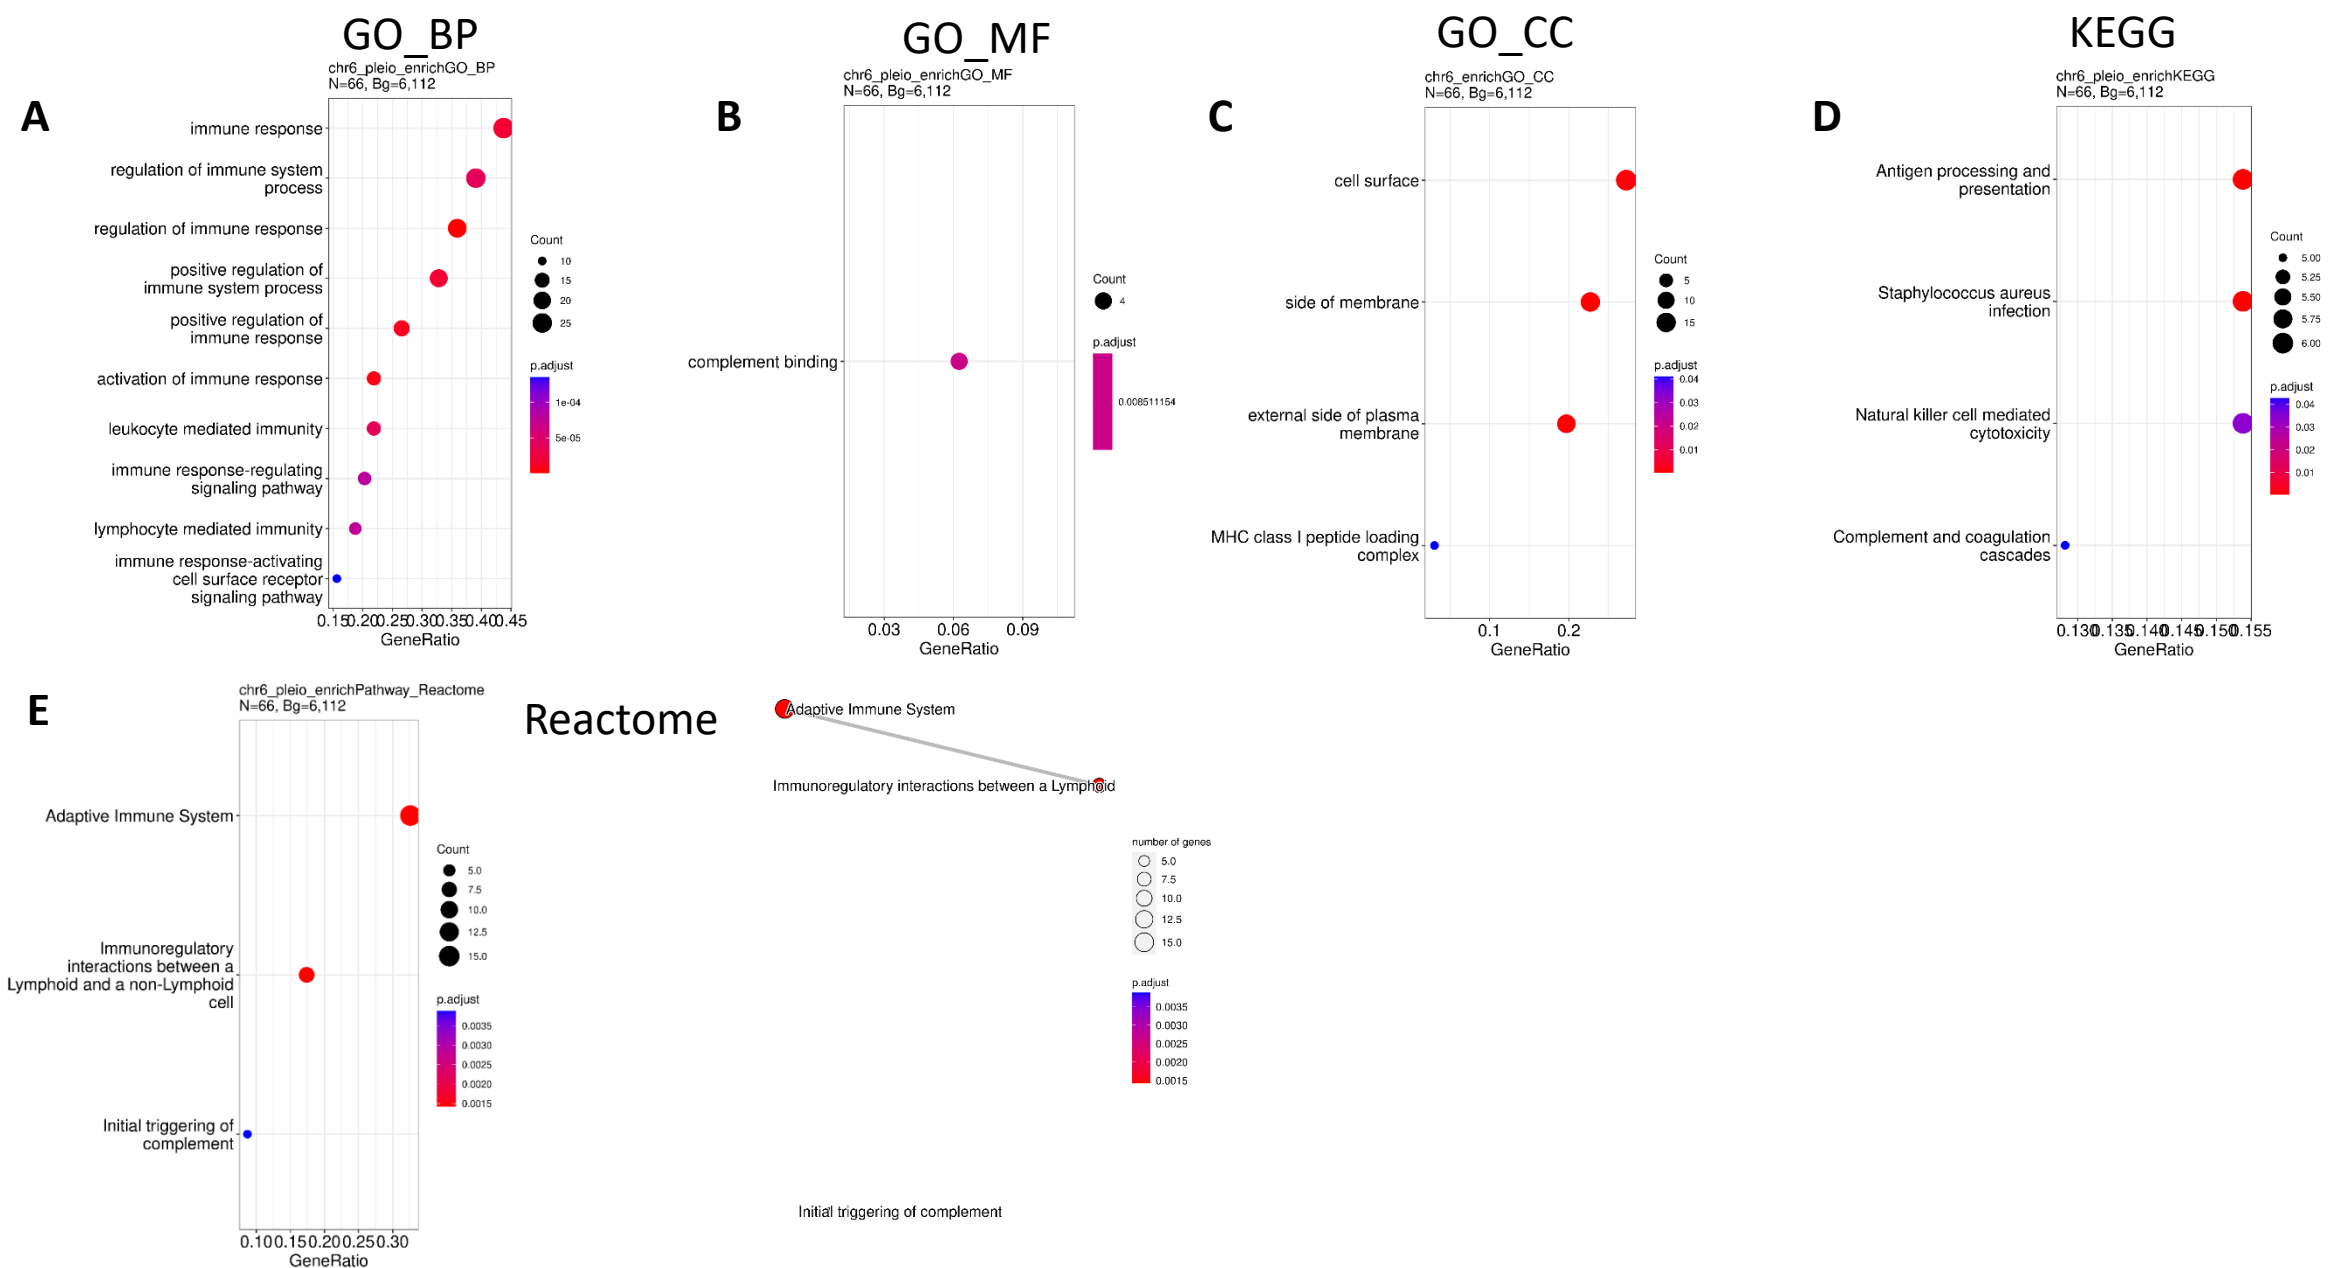

**Supplementary figure 12: Pathway enrichment analysis of all proteins with a pQTL in the chromosome 6 pleiotropic region. A.** Top enriched pathways for proteins with a pQTL in the chr6 pleiotropic region compared to the full SOMAscan7k panel in Gene Ontology’s biological processes. **B.** Top enriched pathways in Gene Ontology’s molecular functions. **C.** Top enriched pathways in Gene Ontology’s cellular components. **D.** Top enriched pathways in KEGG. **E.** Top enriched pathways and enrichment map from Reactome. **F.** Top enriched pathways and enrichment map from Disease Ontology.



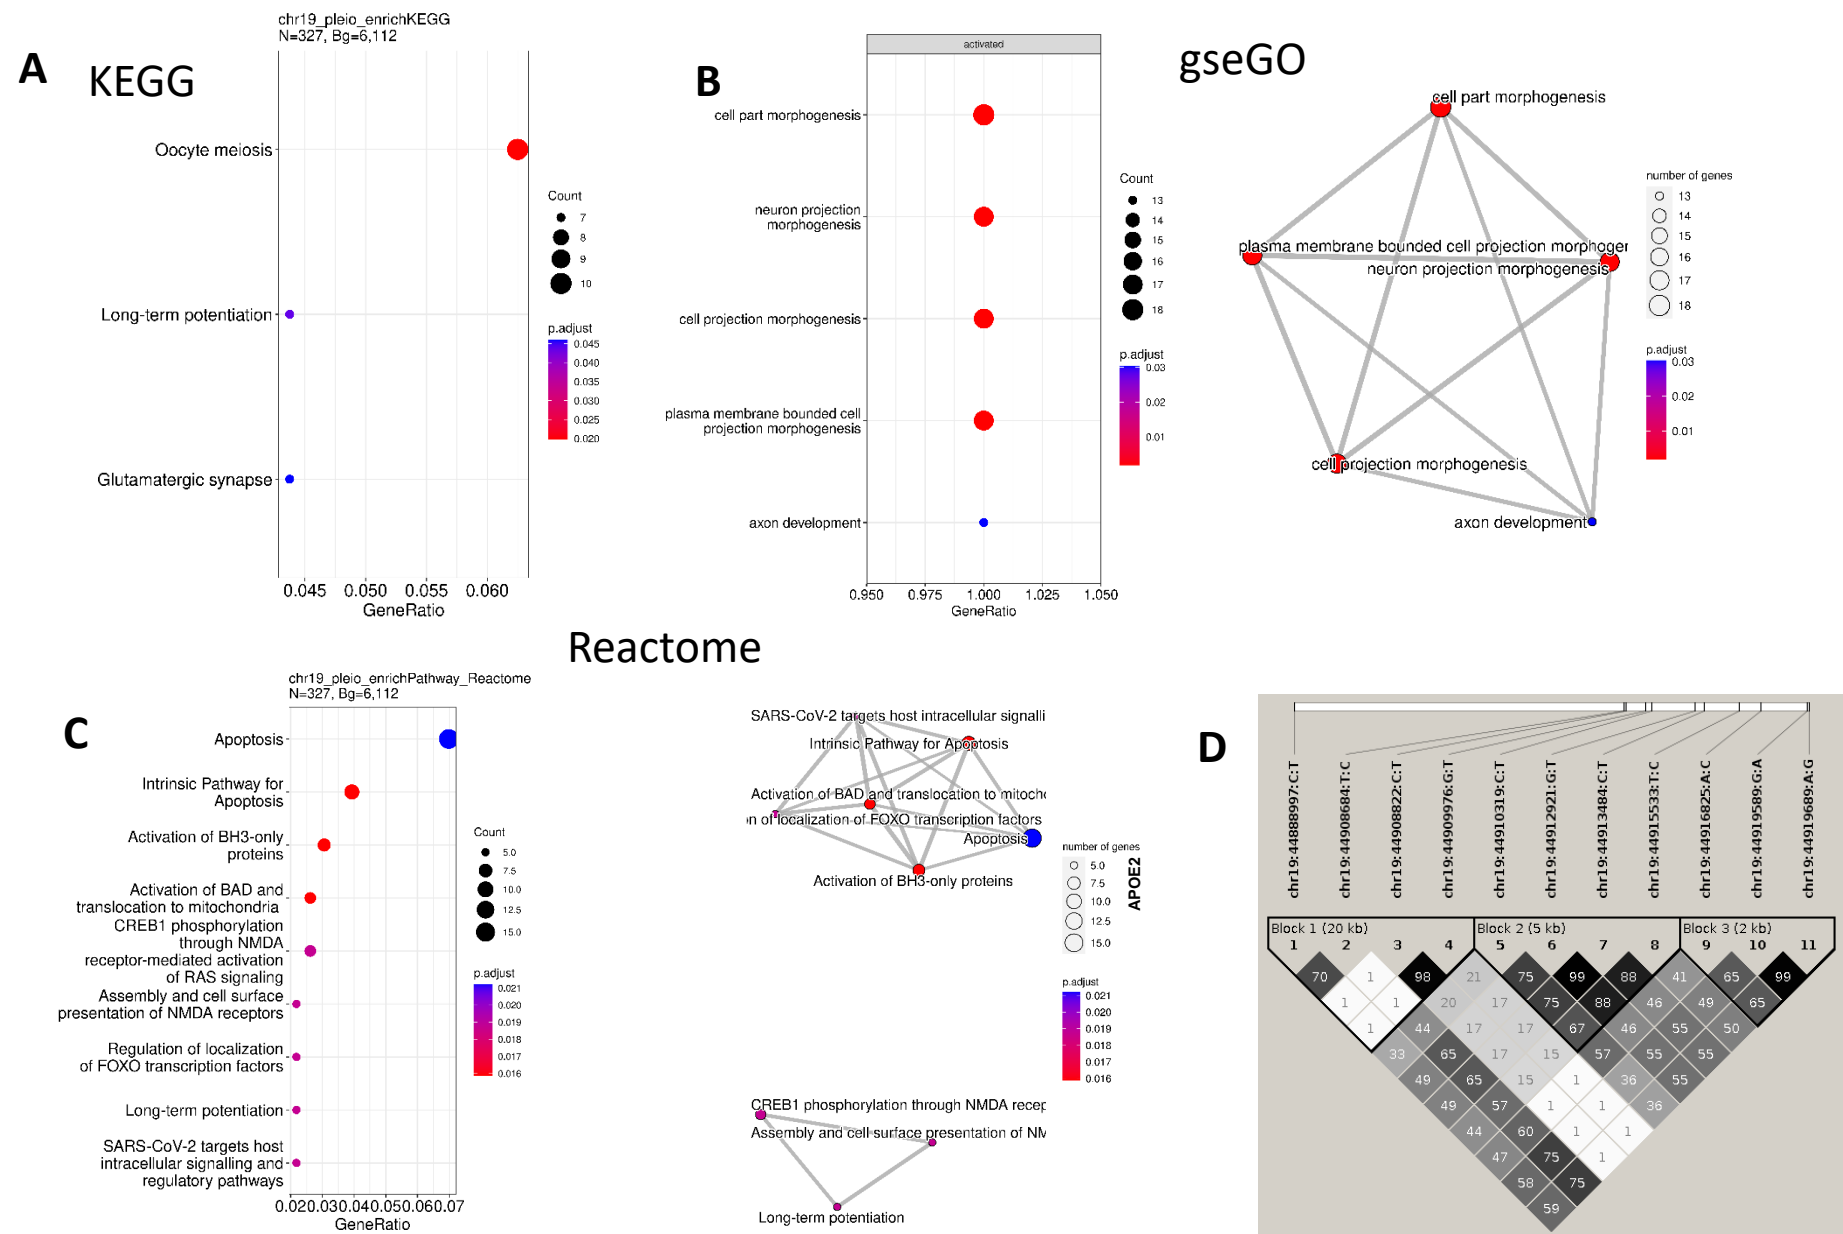

**Supplementary figure 13: Pathway enrichment analysis of all proteins with a pQTL in the chromosome 19 pleiotropic region and Haploview plot of index pQTL variants in the region. A.** Top enriched pathways for proteins with a pQTL in the chromosome 19 pleiotropic region compared to the full SOMAscan7k panel in KEGG. **B.** Top enriched pathways in Gene Ontology using the default gene background. **C.** Top enriched pathways in Reactome. **D.** Haploview plot showing  $R^2$  between all index pQTL variants in the pleiotropic region. Blocks were determined through PLINK using the `–indep-pairwise` flag using an  $R^2$  cutoff of 0.5. **E.** Haploview plot showing  $R^2$  between all index pQTL variants in the pleiotropic region. Blocks were determined through PLINK using the `–indep-pairwise` flag using an  $R^2$  cutoff of 0.8.

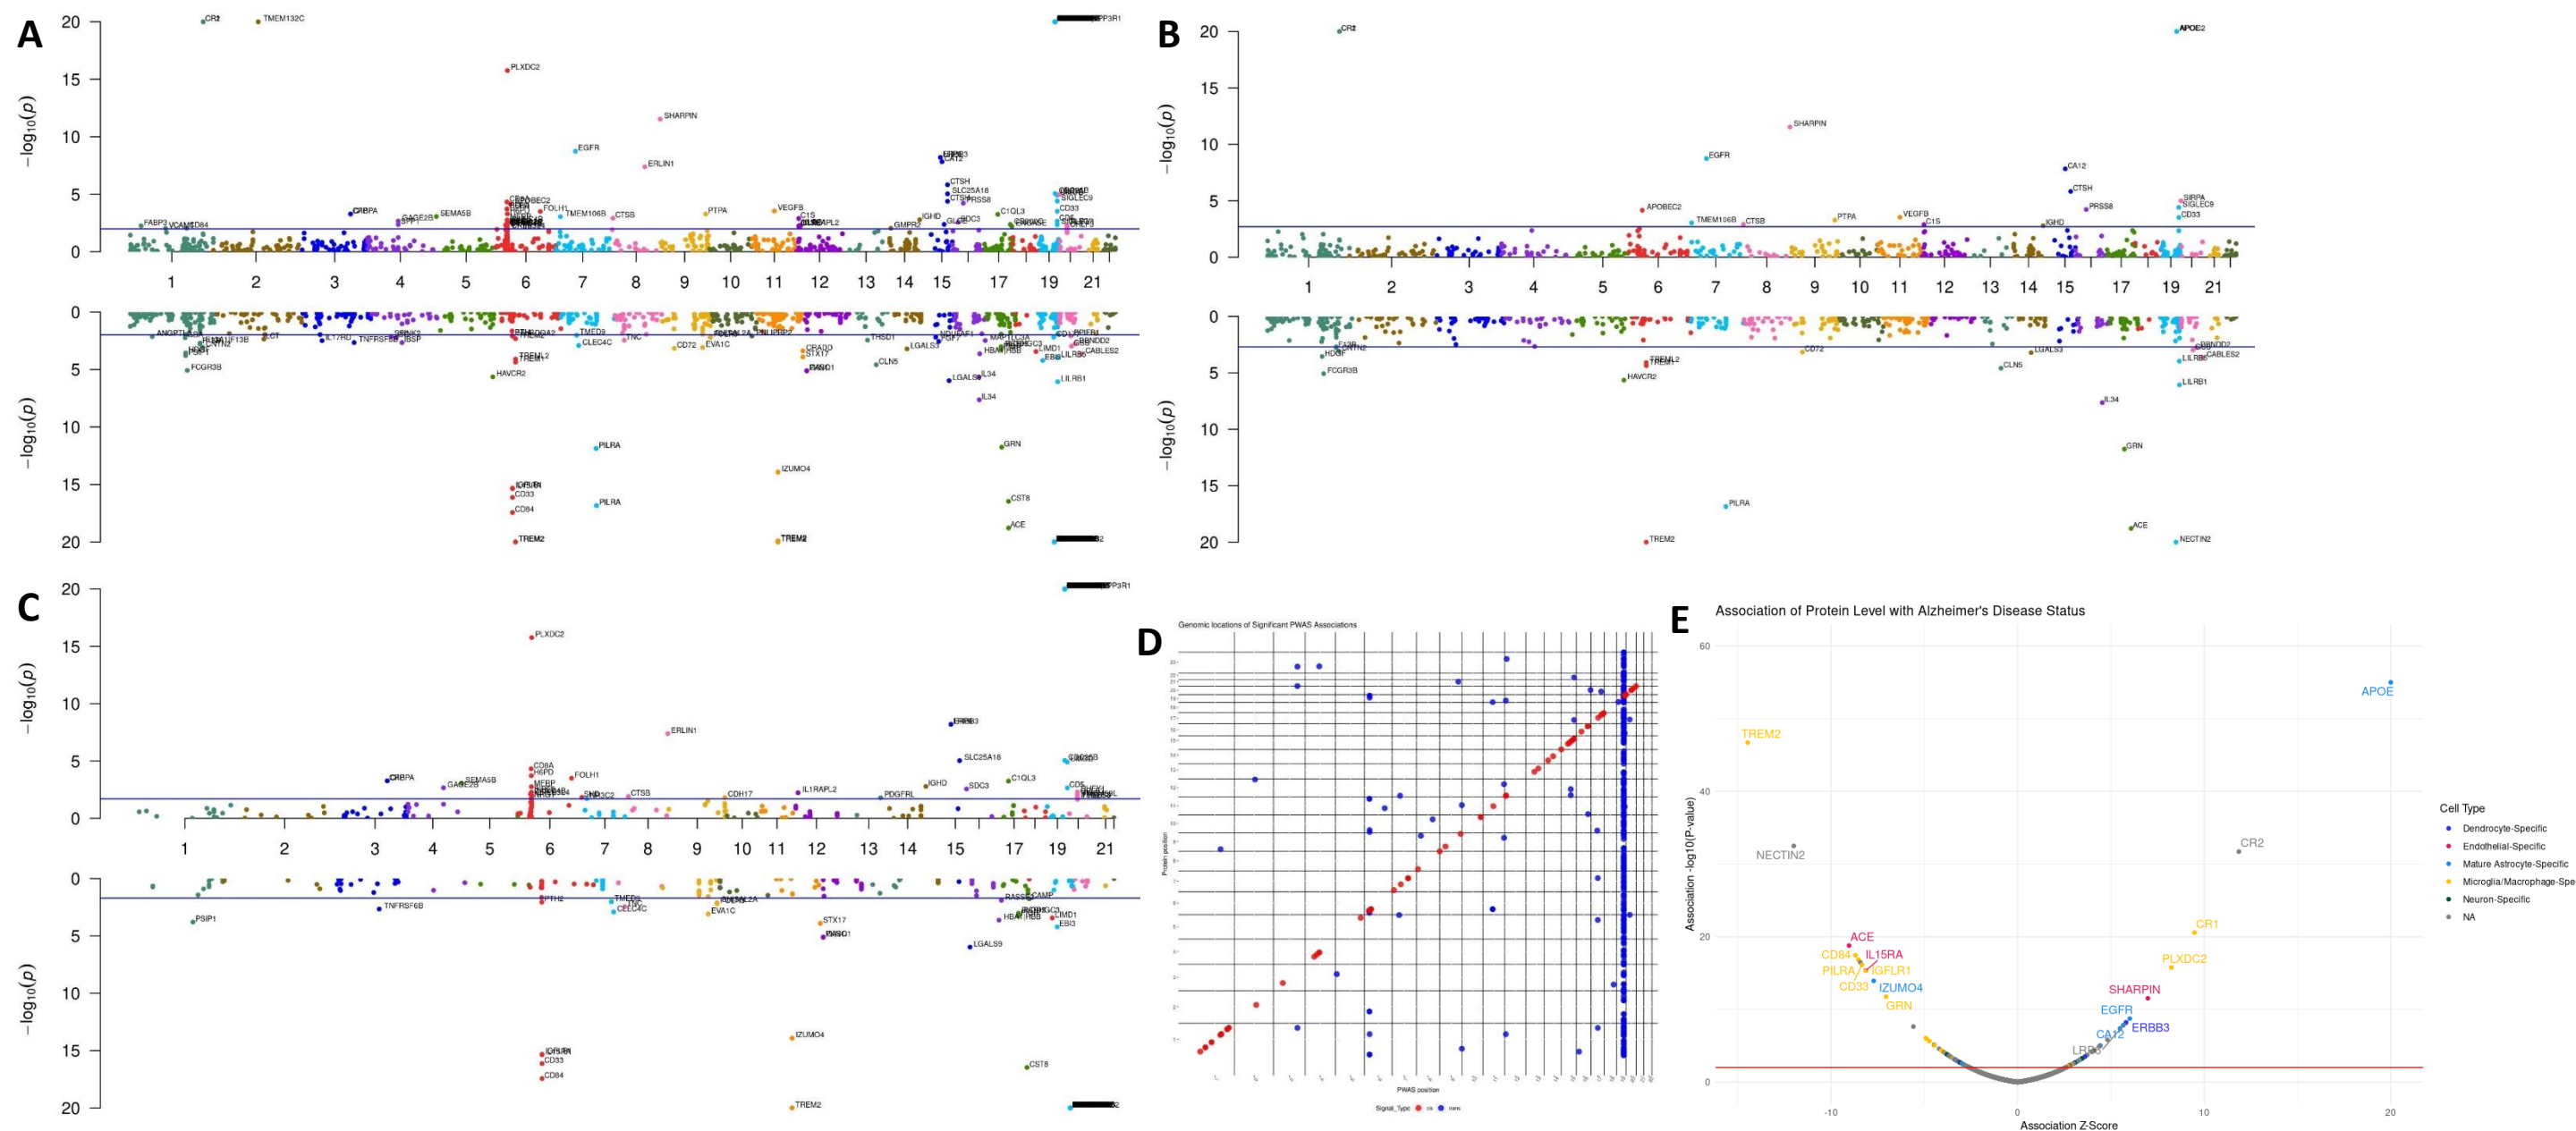

**Supplementary Figure 14: PWAS Plots.** **A.** Miami plot of all significant associations in PWAS (*cis* and *trans*). Proteins are plotted according to the location of the index pQTL variant in the association region. Blue line is B&H FDR-corrected p-value threshold ( $P = 0.0104$ ). Top: positive PWAS z-scores. Bottom: negative PWAS z-scores. **B.** Miami plot of all significant *cis* associations through PWAS. Blue line is same B&H FDR-corrected p-value threshold as full plot. **C.** Miami plot of all significant *trans* associations through PWAS. Blue line is same B&H FDR-corrected p-value threshold as full plot. **D.** 2D Manhattan plot of all significant PWAS associations. **E.** Volcano plot of PWAS Z-scores. Red line is B&H FDR-corrected p-value threshold. Proteins are colored by their specific brain-relevant cell type.

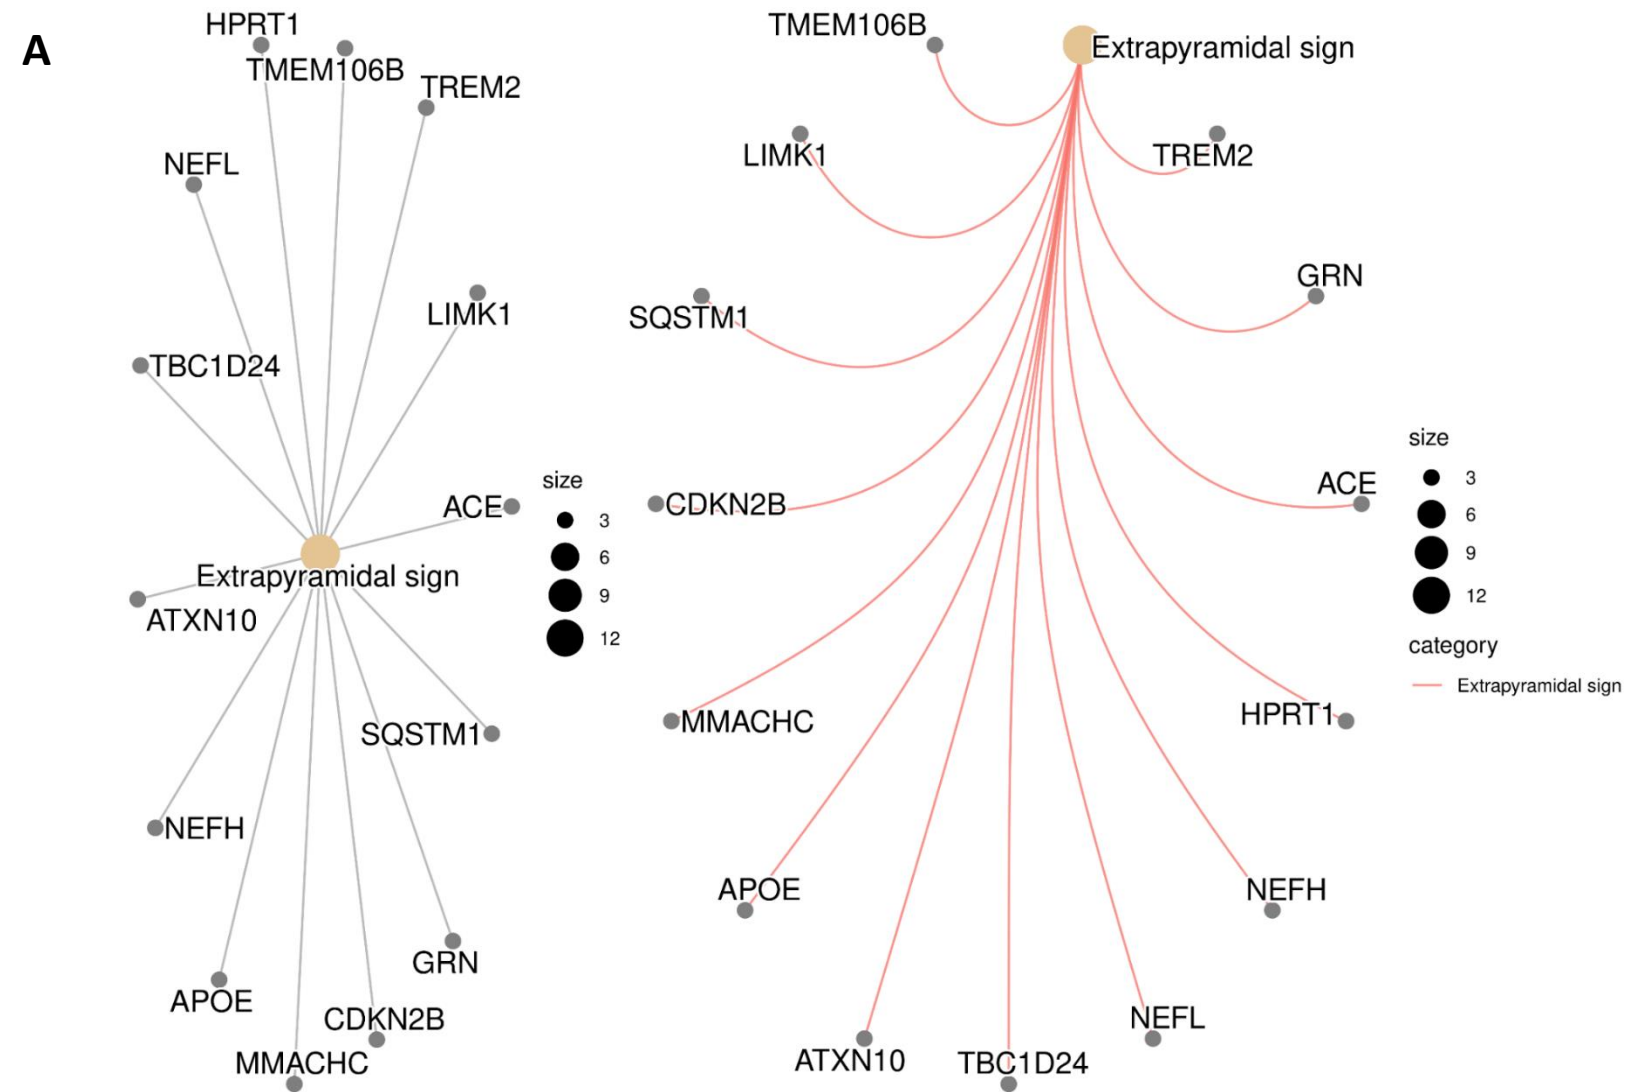

**Supplementary Figure 15: Pathway enrichment analysis for all proteins that were significant in PWAS. A. Top enriched pathways and enrichment map from DisGeNet.**

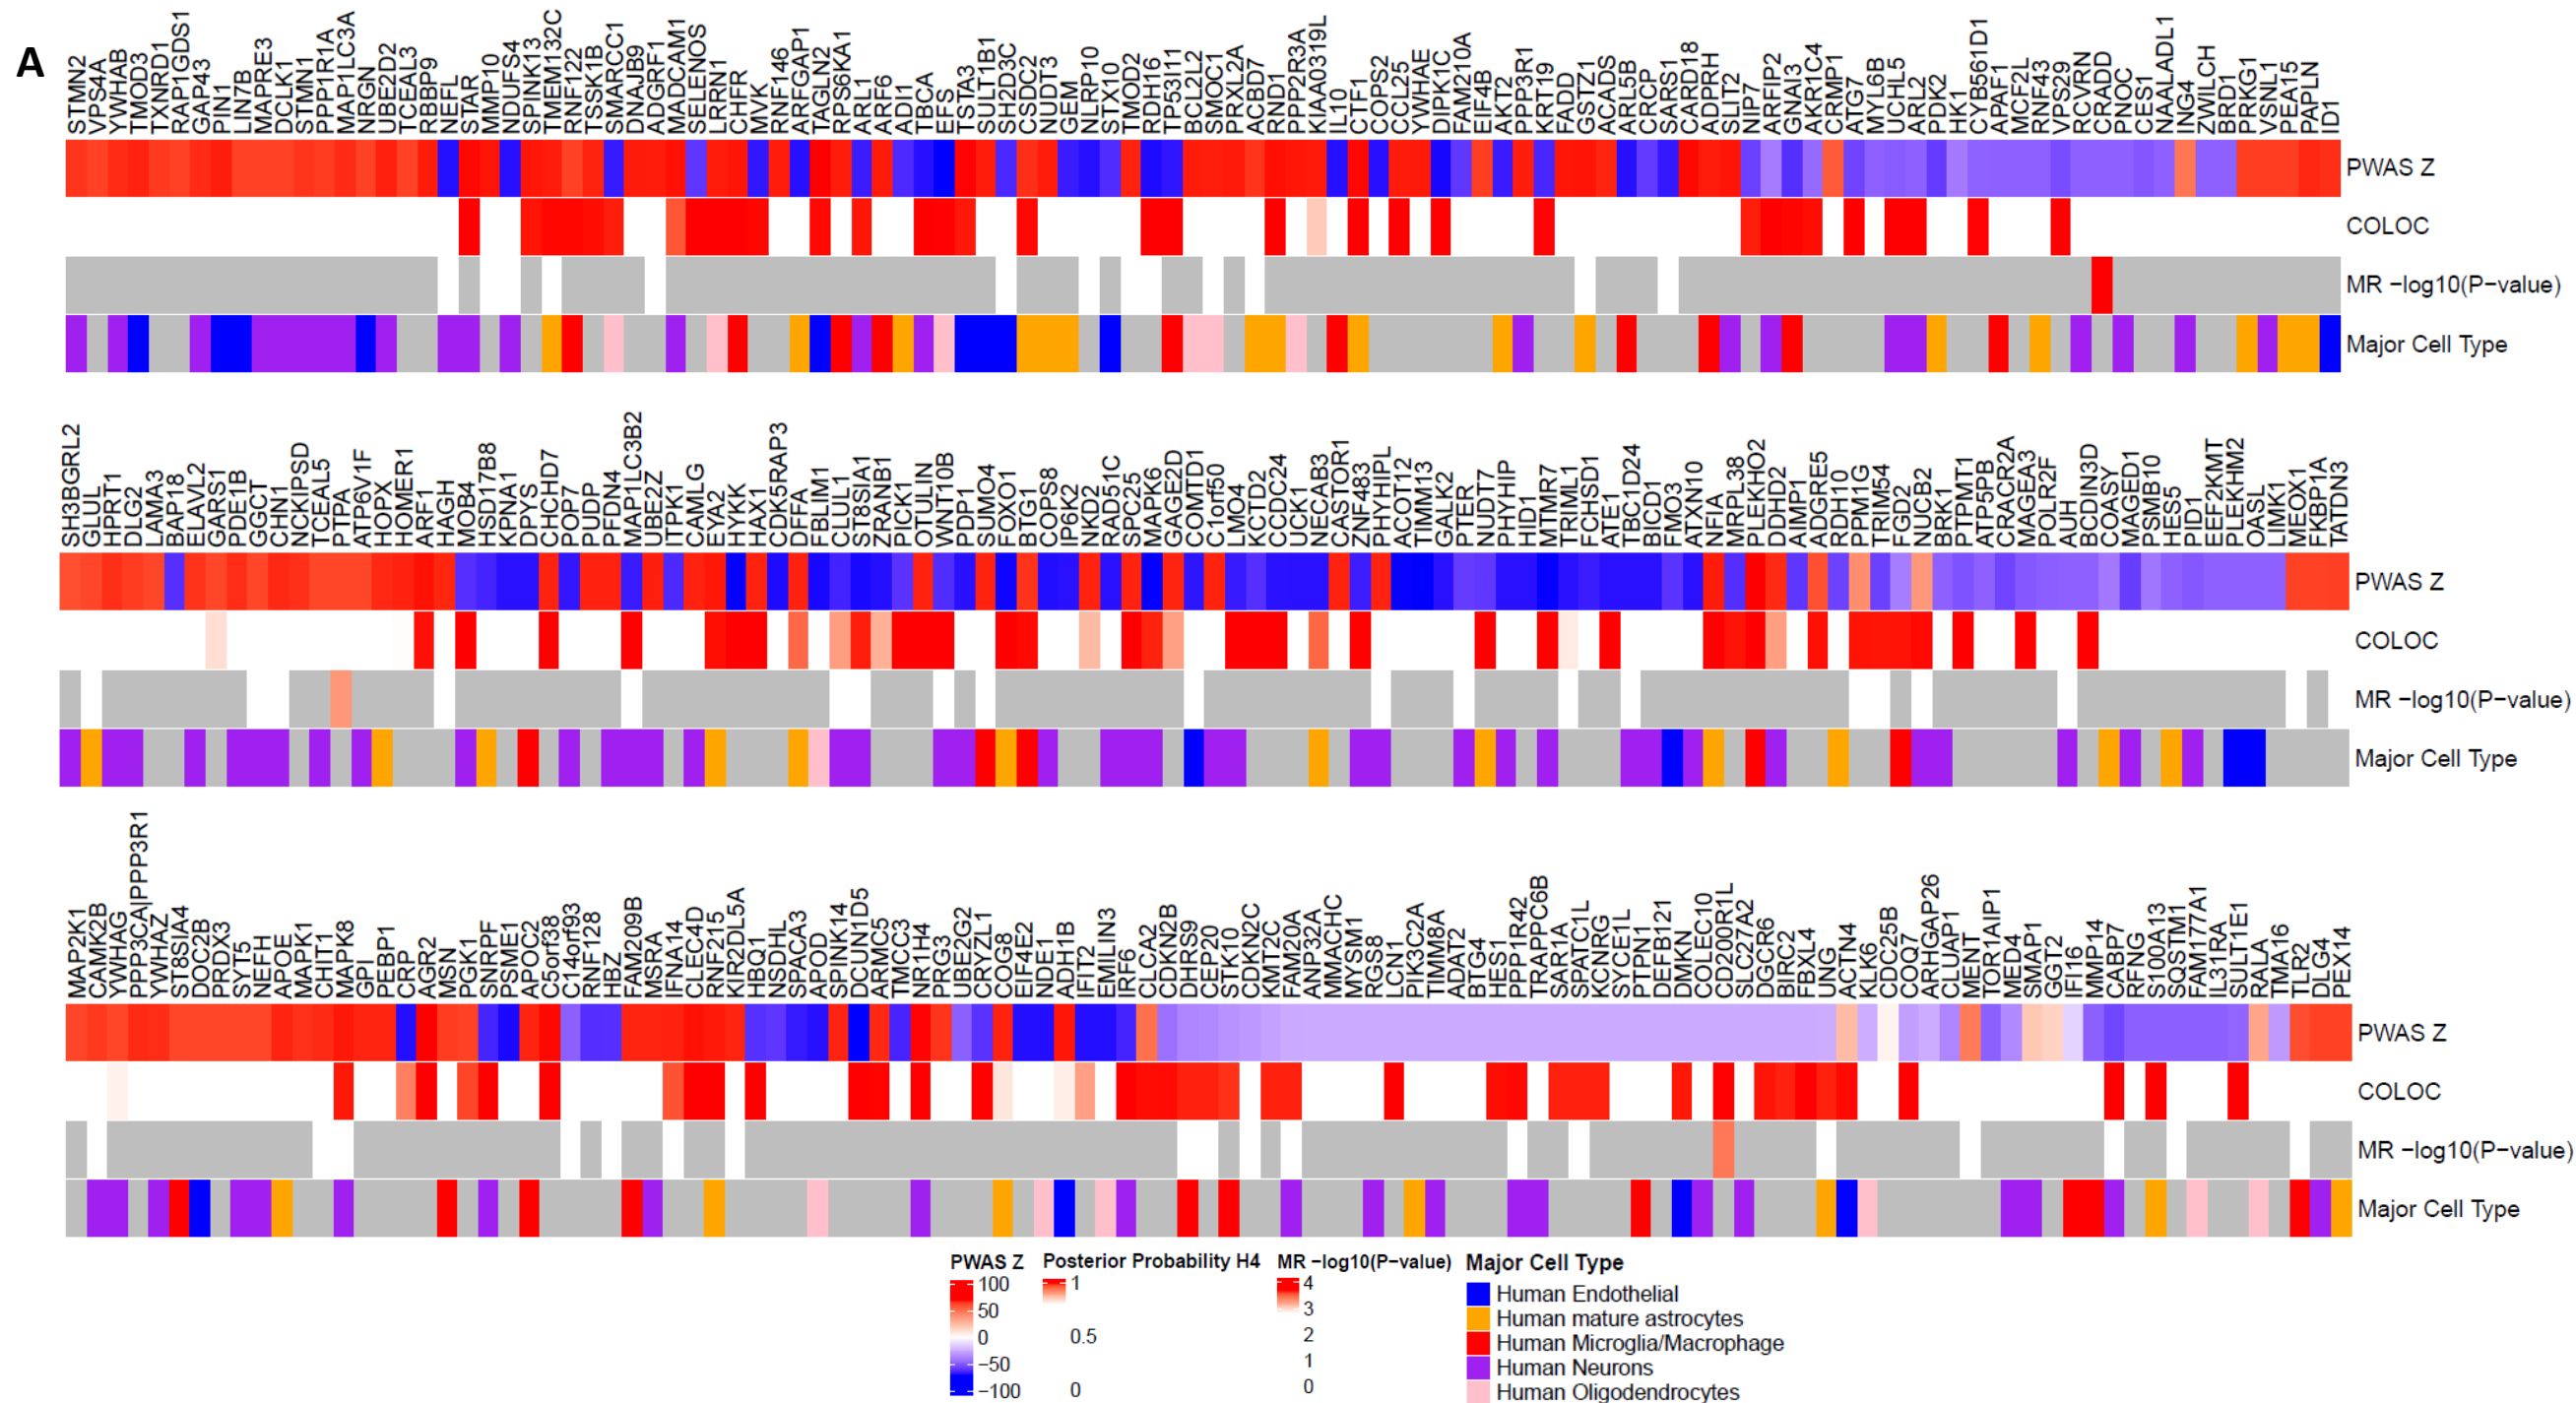

**Supplementary Figure 16: Characterization of all APOE-region pQTLs significant through PWAS. A.** Details of all proteins with a pQTL in the chromosome 19 pleiotropic region that are significant through PWAS. PWAS Z: Z-score for the association between protein level and AD. COLOC: Posterior probability of a shared causal variant between the pQTL and AD. MR -log10(P-value): P-value for the association between protein and AD through Mendelian randomization. Major Cell Type: Predominant brain-relevant cell type for each protein.



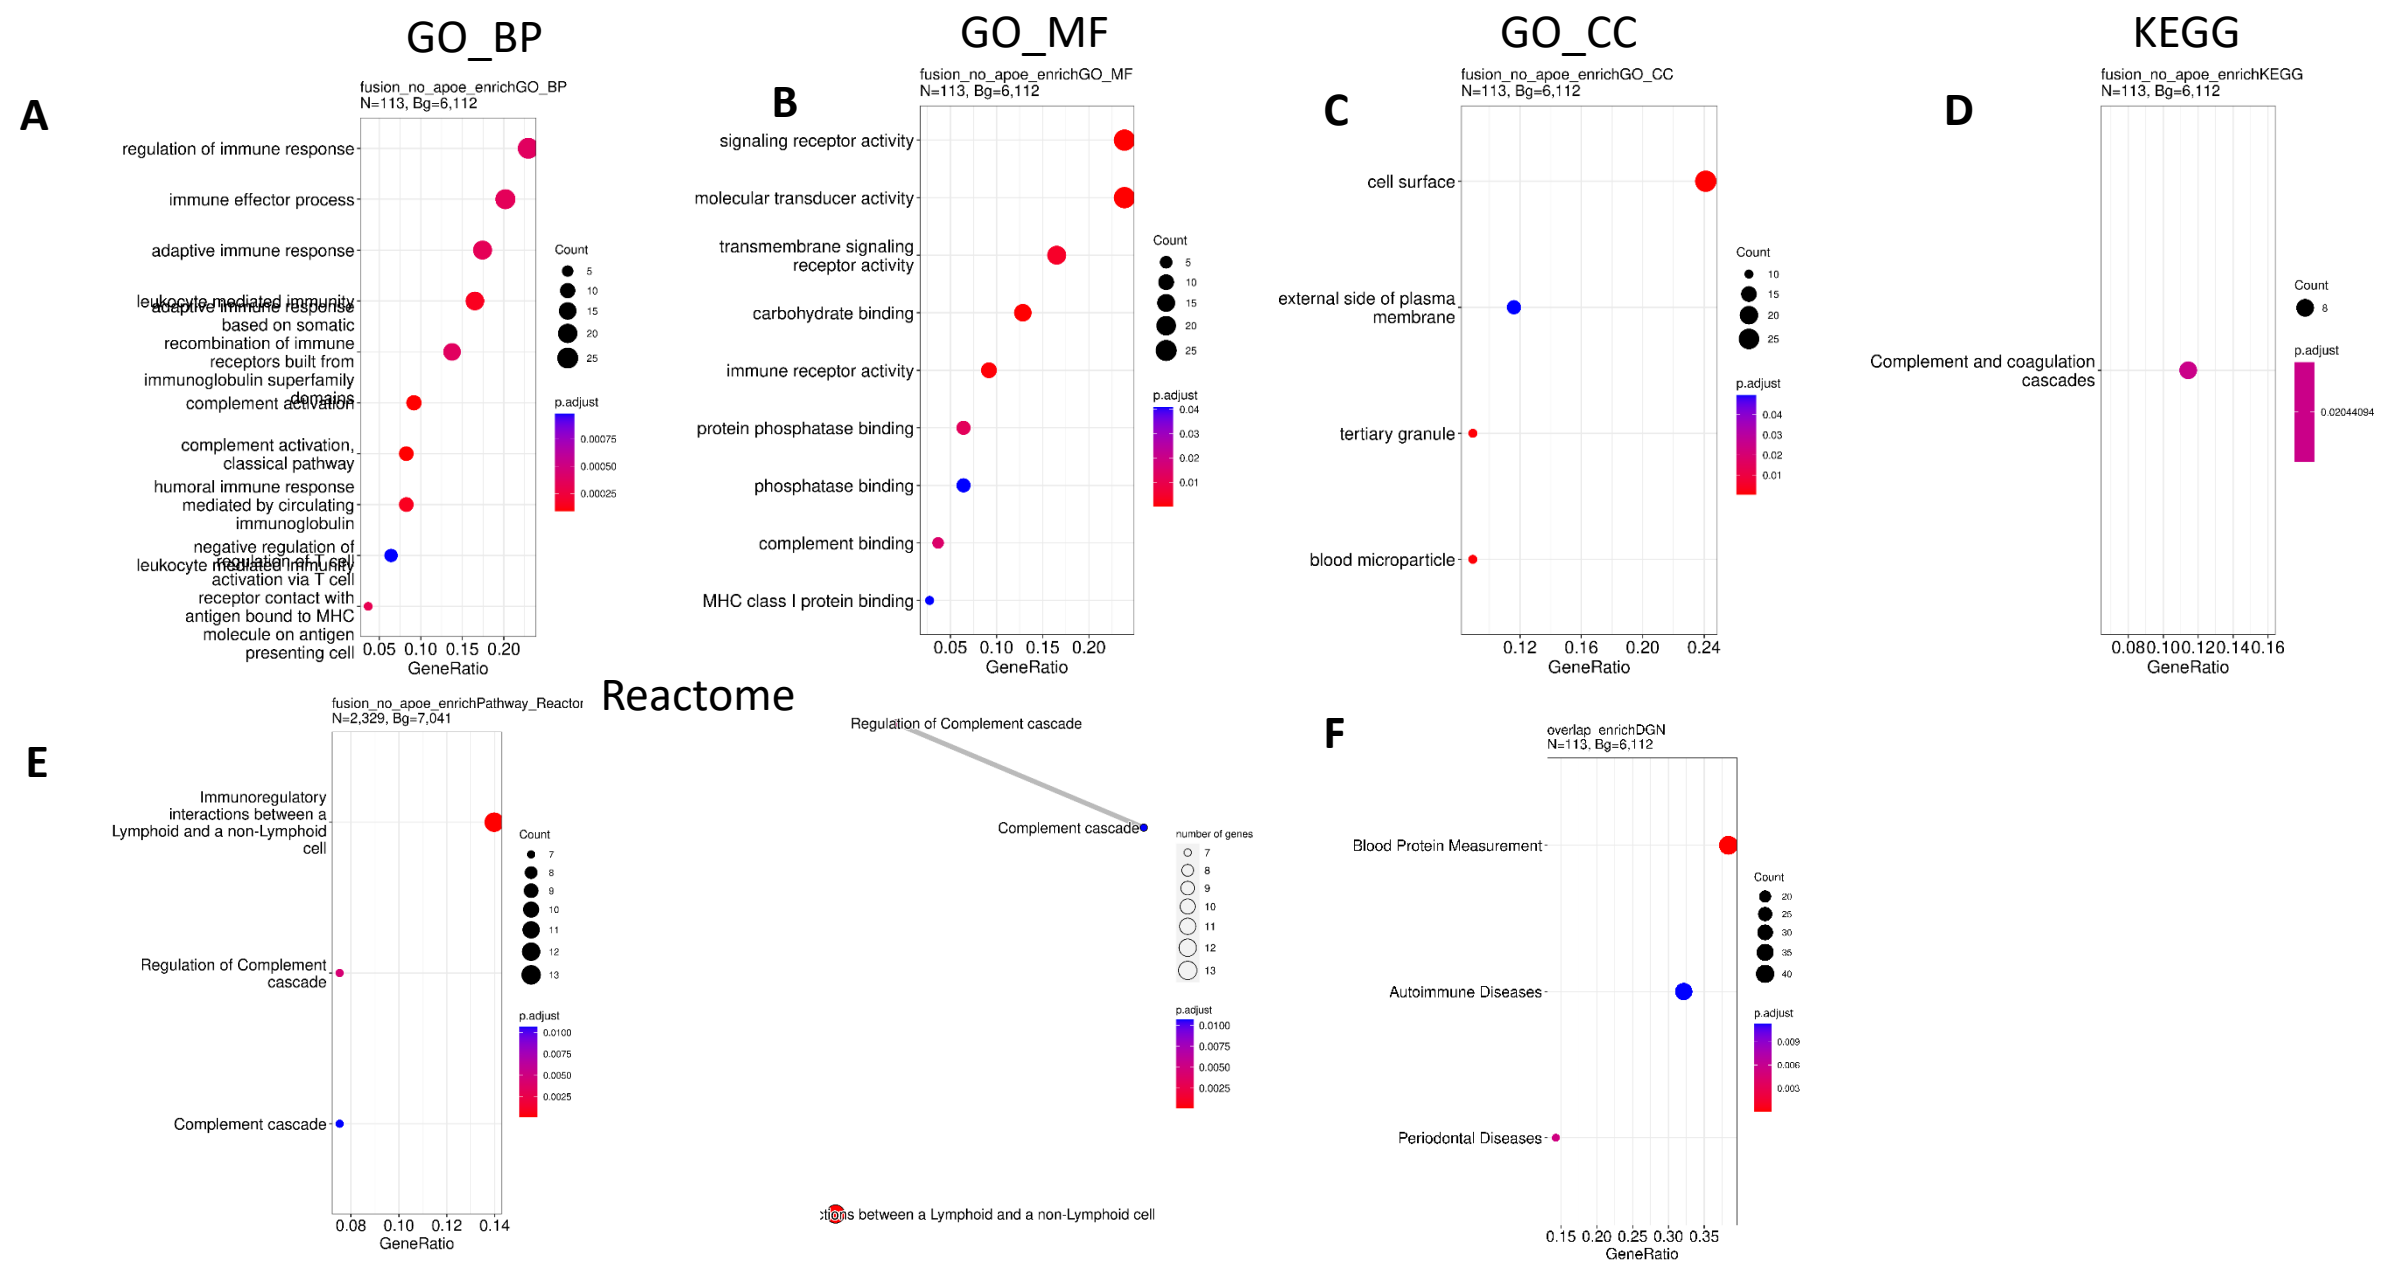

**Supplementary Figure 17: Pathway enrichment analysis for all proteins (excl APOE region) that were significant in PWAS. A.** Top enriched pathways for PWAS-significant proteins (excluding the *APOE* pleiotropic region) compared to the full SOMAscan7k panel in Gene Ontology’s biological processes. **B.** Top enriched pathways in Gene Ontology’s molecular functions. **C.** Top enriched pathways in Gene Ontology’s cellular components. **D.** Top enriched pathways in KEGG. **E.** Top enriched pathways and enrichment map from Reactome. **F.** Enriched pathways in DisGeNet.

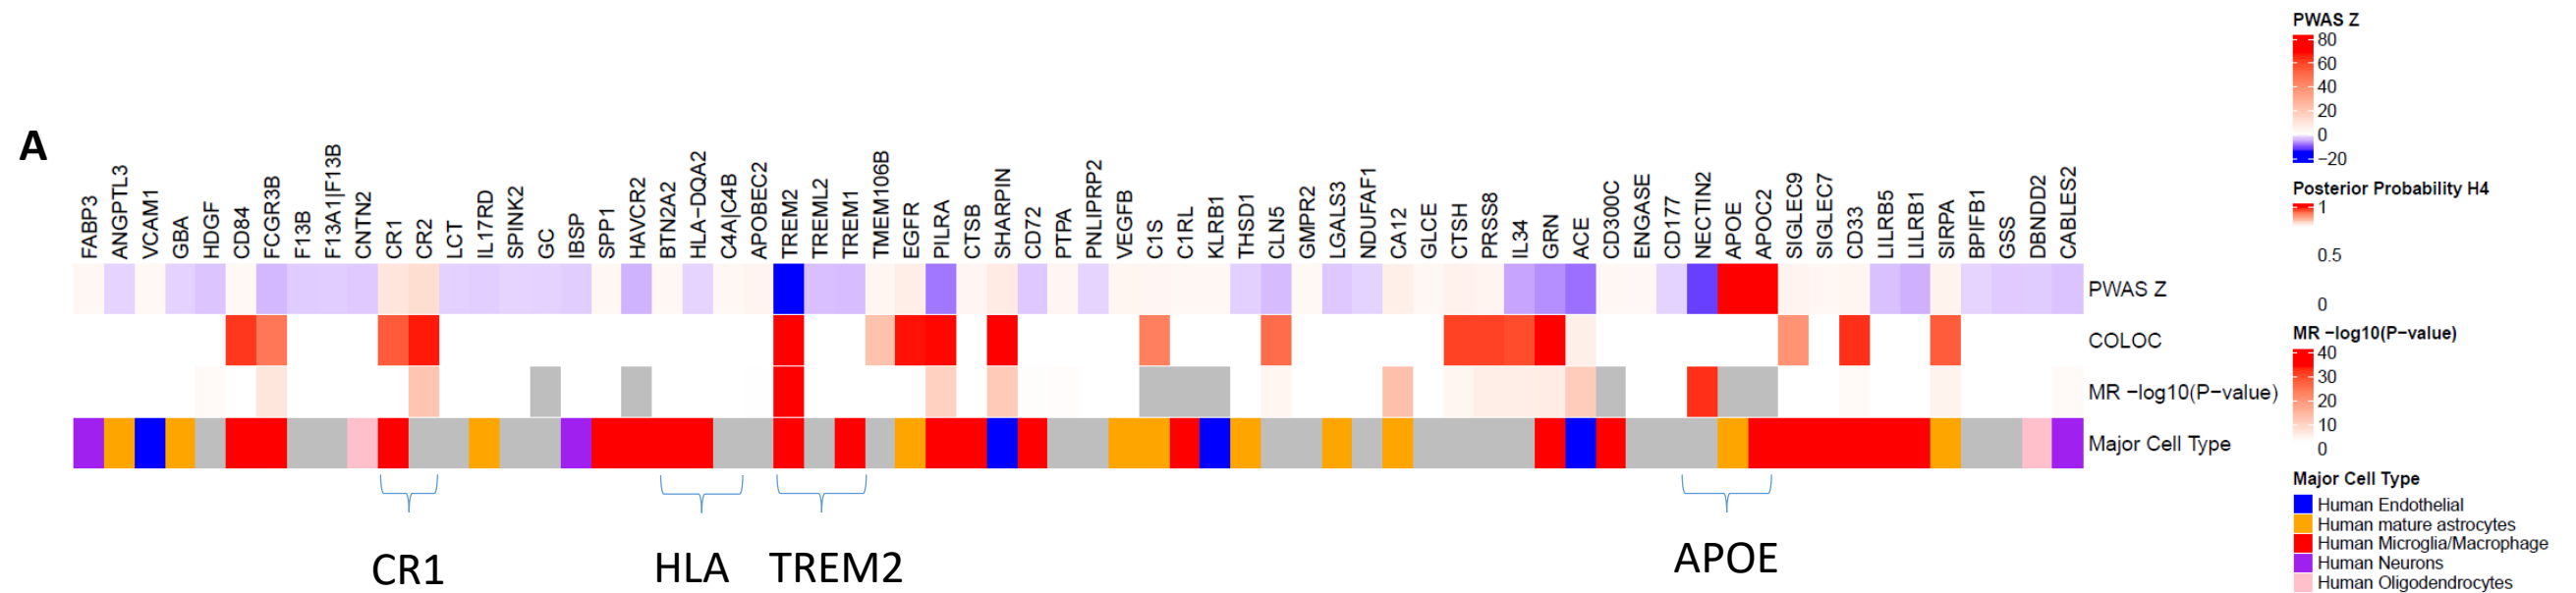

**Supplementary Figure 18: Characterization of all *cis*-pQTLs significant through PWAS. A.** Details of all proteins with a *cis*-pQTL that are significant through PWAS. PWAS Z: Z-score for the association between protein level and AD. COLOC: Posterior probability of a shared causal variant between the pQTL and AD. MR Z: Z-score for the association between protein and AD through Mendelian randomization. Major Cell Type: Predominant brain-relevant cell type for each protein.

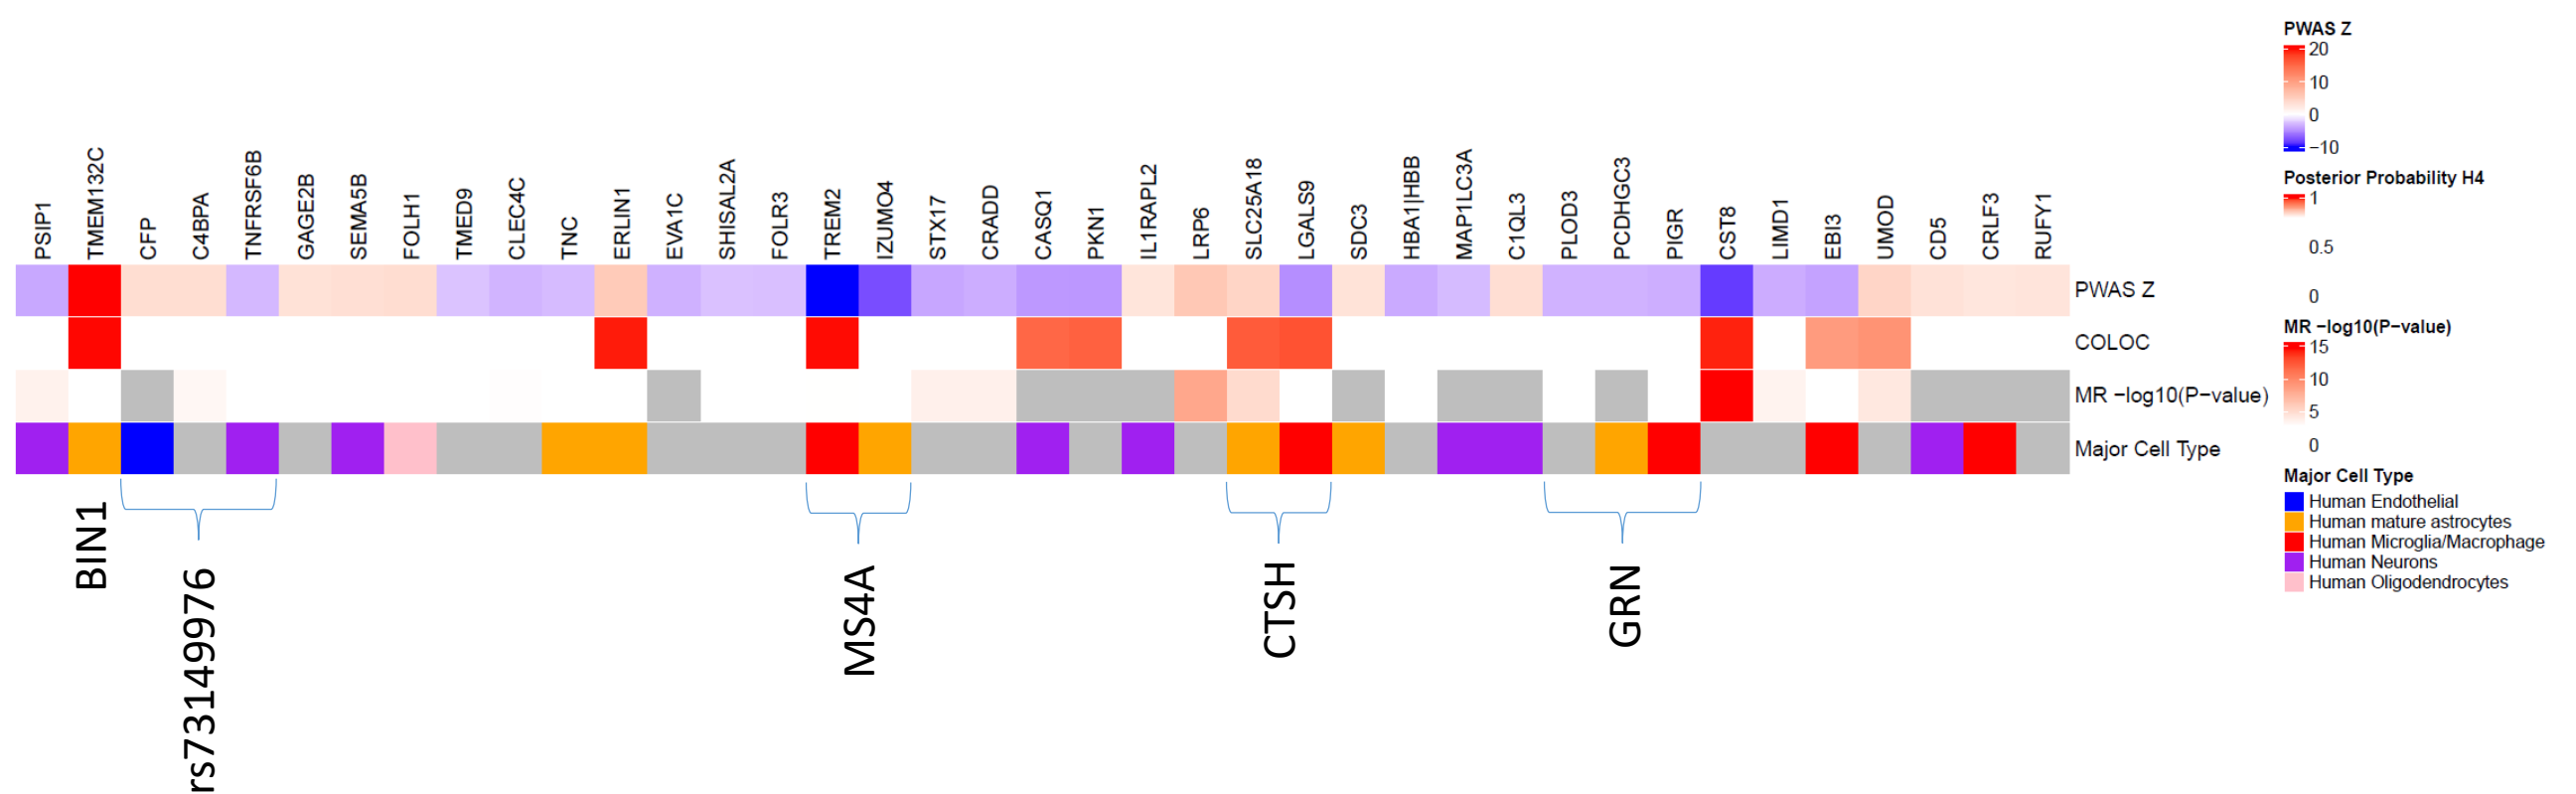

**Supplementary Figure 19: Characterization of all trans pQTLs (excluding APOE region and MHC region) significant through PWAS. A.** Details of all proteins with a *trans*-pQTL outside the chromosome 19 pleiotropic region that are significant through PWAS. PWAS Z: Z-score for the association between protein level and AD. COLOC: Posterior probability of a shared causal variant between the pQTL and AD. MR -log10(P): Z-score for the association between protein and AD through Mendelian randomization. Major Cell Type: Predominant brain-relevant cell type for each protein.

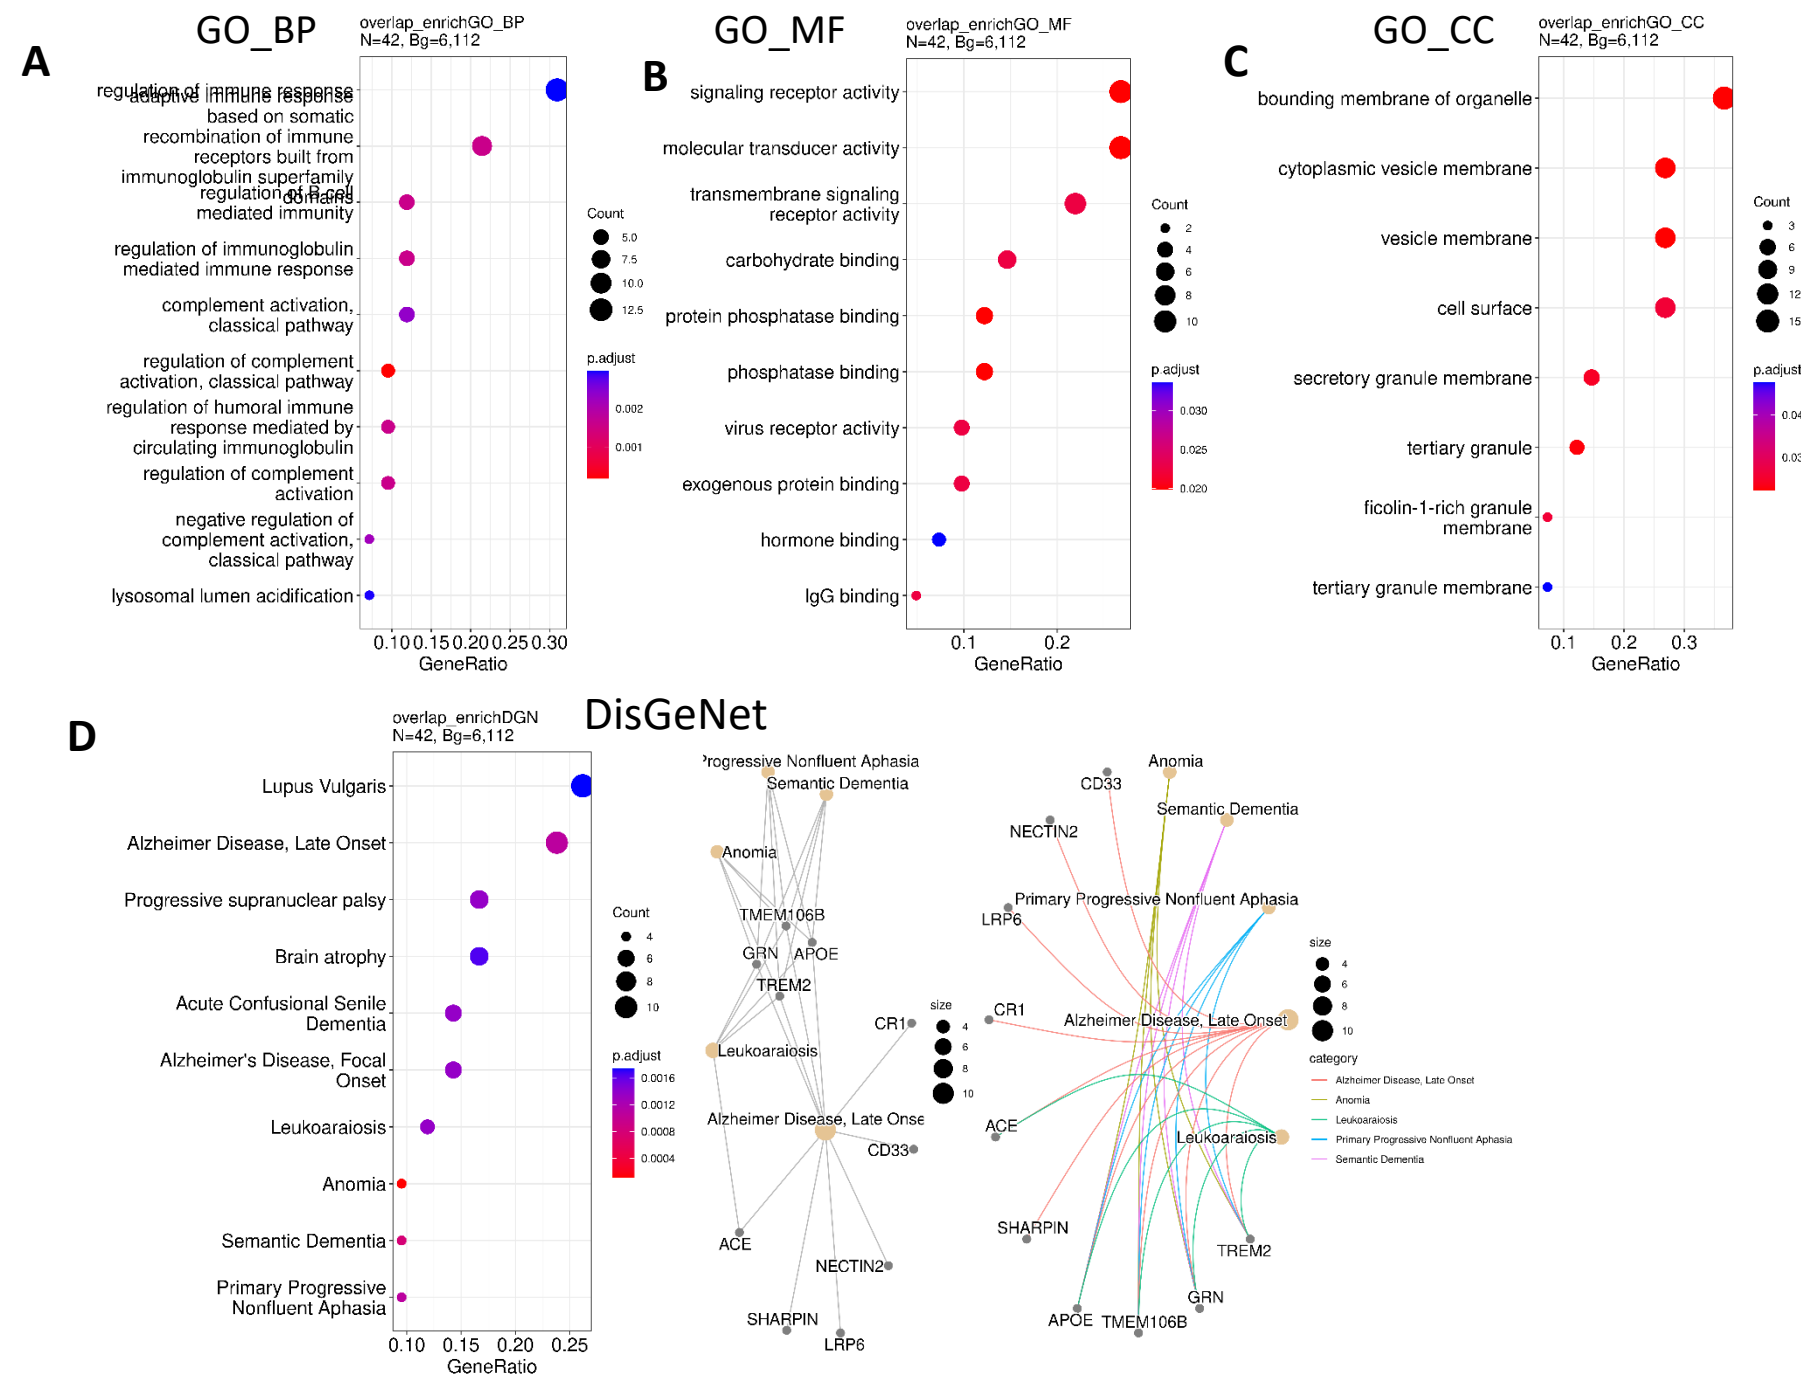

**Supplementary Figure 20: Pathway Enrichment analysis of proteins that overlapped between at least two of PWAS, COLOC, and MR. A.** Top enriched pathways for proteins that are significant in at least two of PWAS, COLOC, and MR for AD compared to the full SOMAscan7k panel in Gene Ontology’s biological processes. **B.** Top enriched pathways in Gene Ontology’s molecular functions. **C.** Top enriched pathways in Gene Ontology’s cellular components. **D.** Top enriched pathways and enrichment map from DisGeNet.



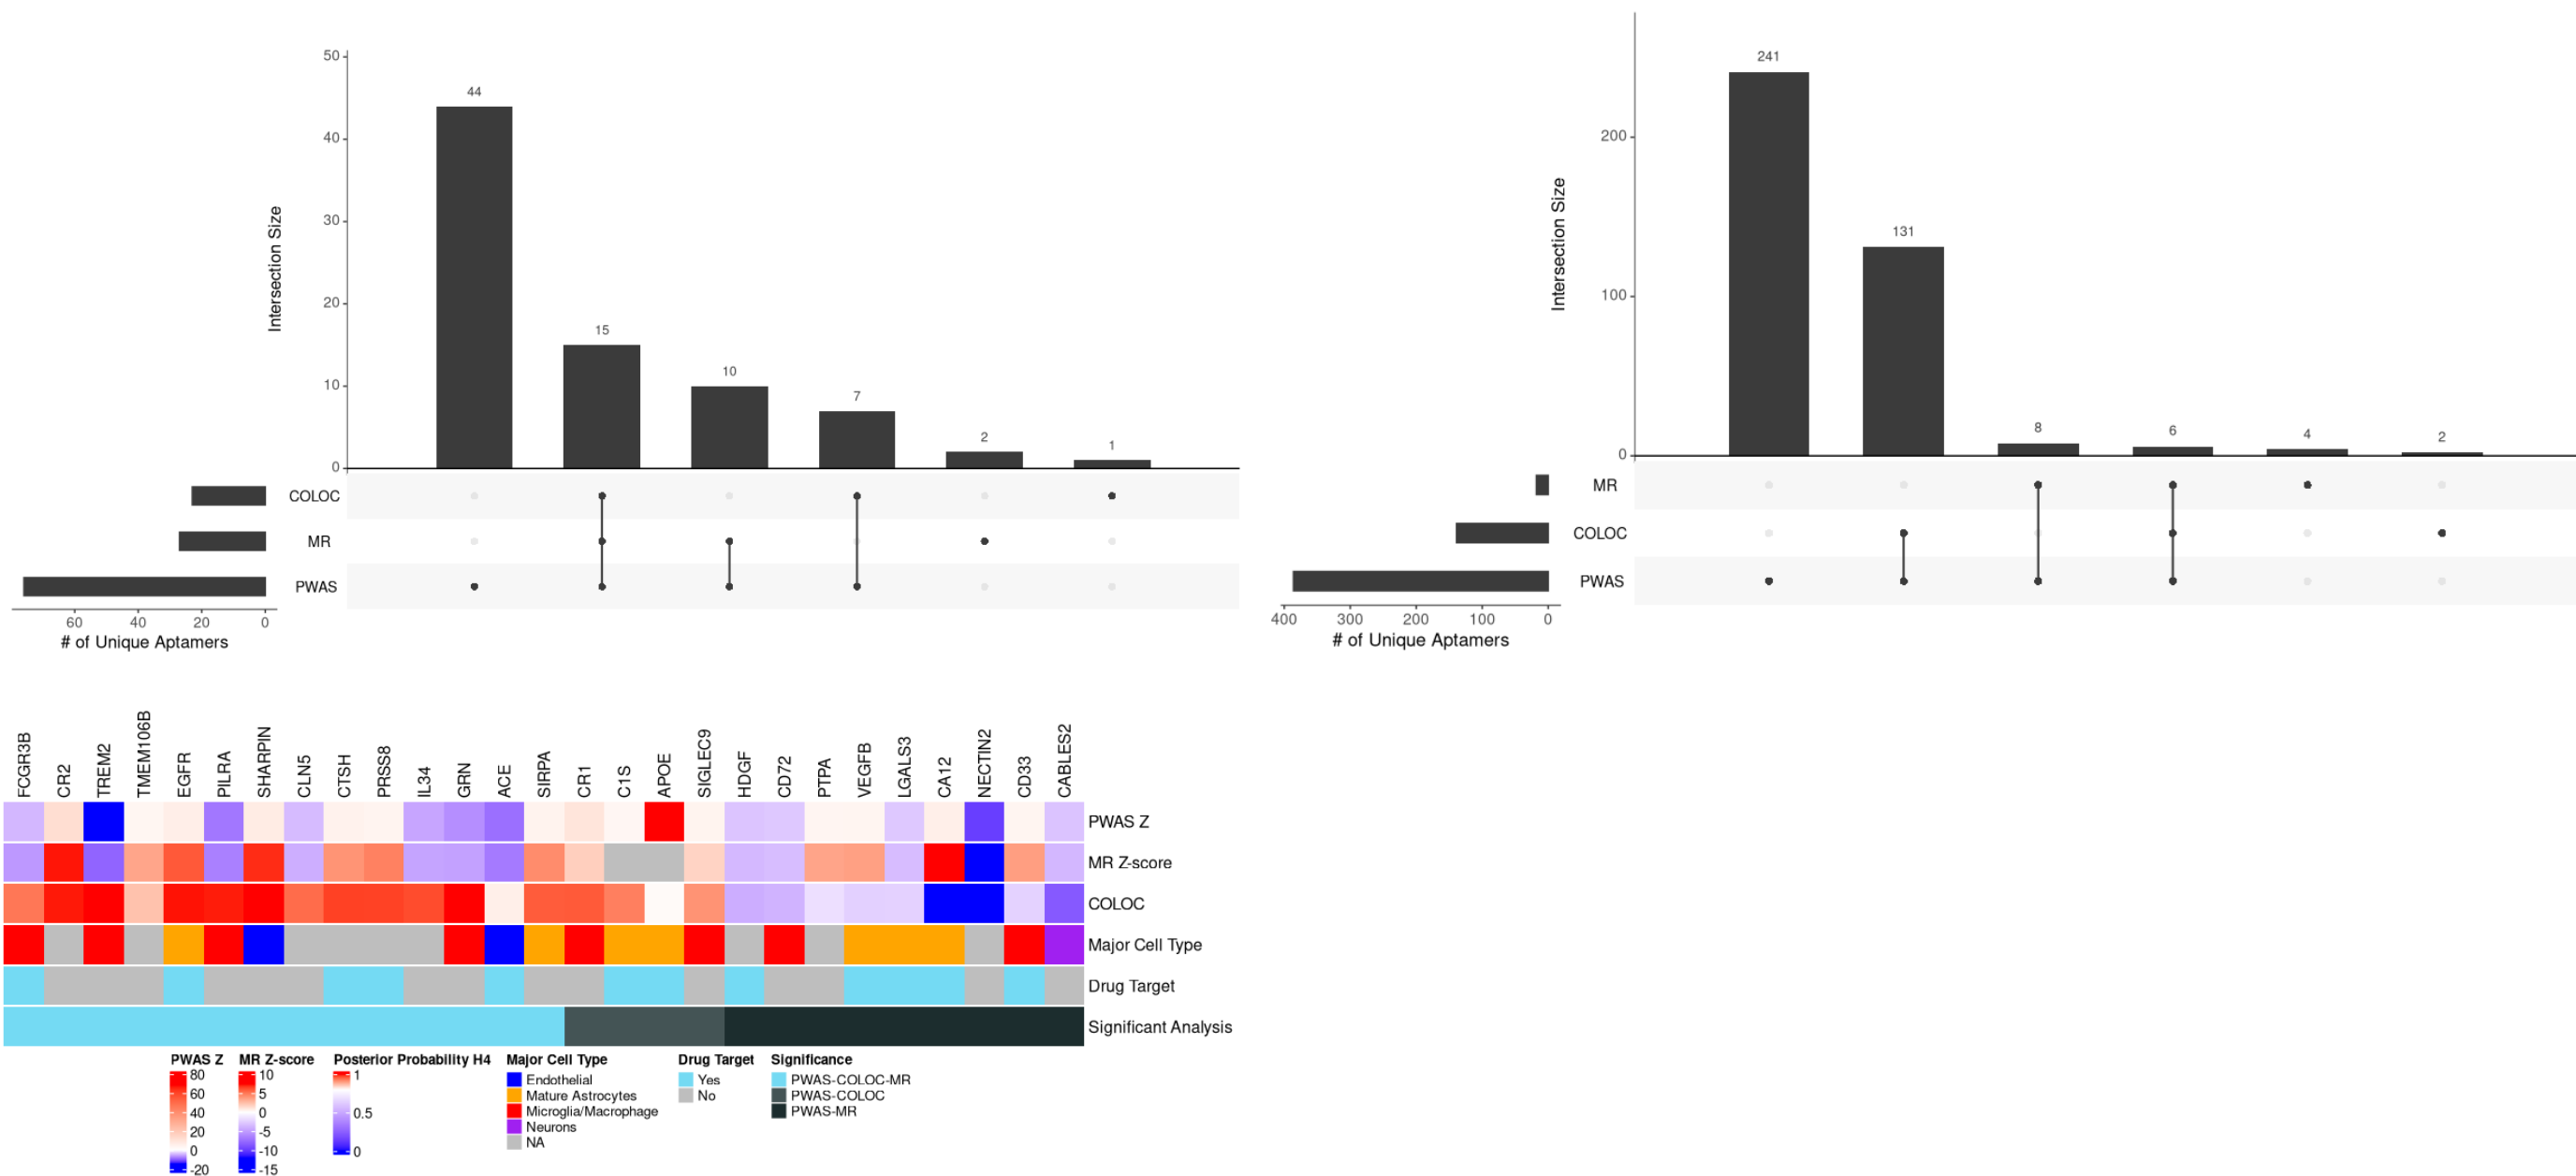

**Supplementary Figure 21: Overlap between PWAS, COLOC, and MR for *cis* & *trans* associations.** **A.** Upset plot showing the overlap of aptamers significant for at least one of PWAS, COLOC, and MR including only *cis*-pQTL associations. **B.** Upset plot showing overlap between aptamers significant for at least one of PWAS, COLOC, and MR through their *trans*-pQTL. **C.** Description of the proteins that overlap between at least two of PWAS, colocalization, and MR using *cis*-only pQTL associations. PWAS Z & MR Z: red represents positive Z-score, blue represents negative z-score. COLOC: color represents posterior probability of sharing a genetic signal between pQTL and AD (Red: PP.H4 > 0.8; blue: PP.H4 < 0.8). Major cell type: Predominant brain-relevant cell type for proteins of interest. Drug Target: Proteins targeted by a molecule as described in the DrugBank database. Significant Analysis: Of PWAS, COLOC, and MR, light blue corresponds to reaching inclusion threshold in all three; gray corresponds to reaching inclusion threshold in only PWAS & COLOC, black corresponds to reaching inclusion threshold in only PWAS and MR.

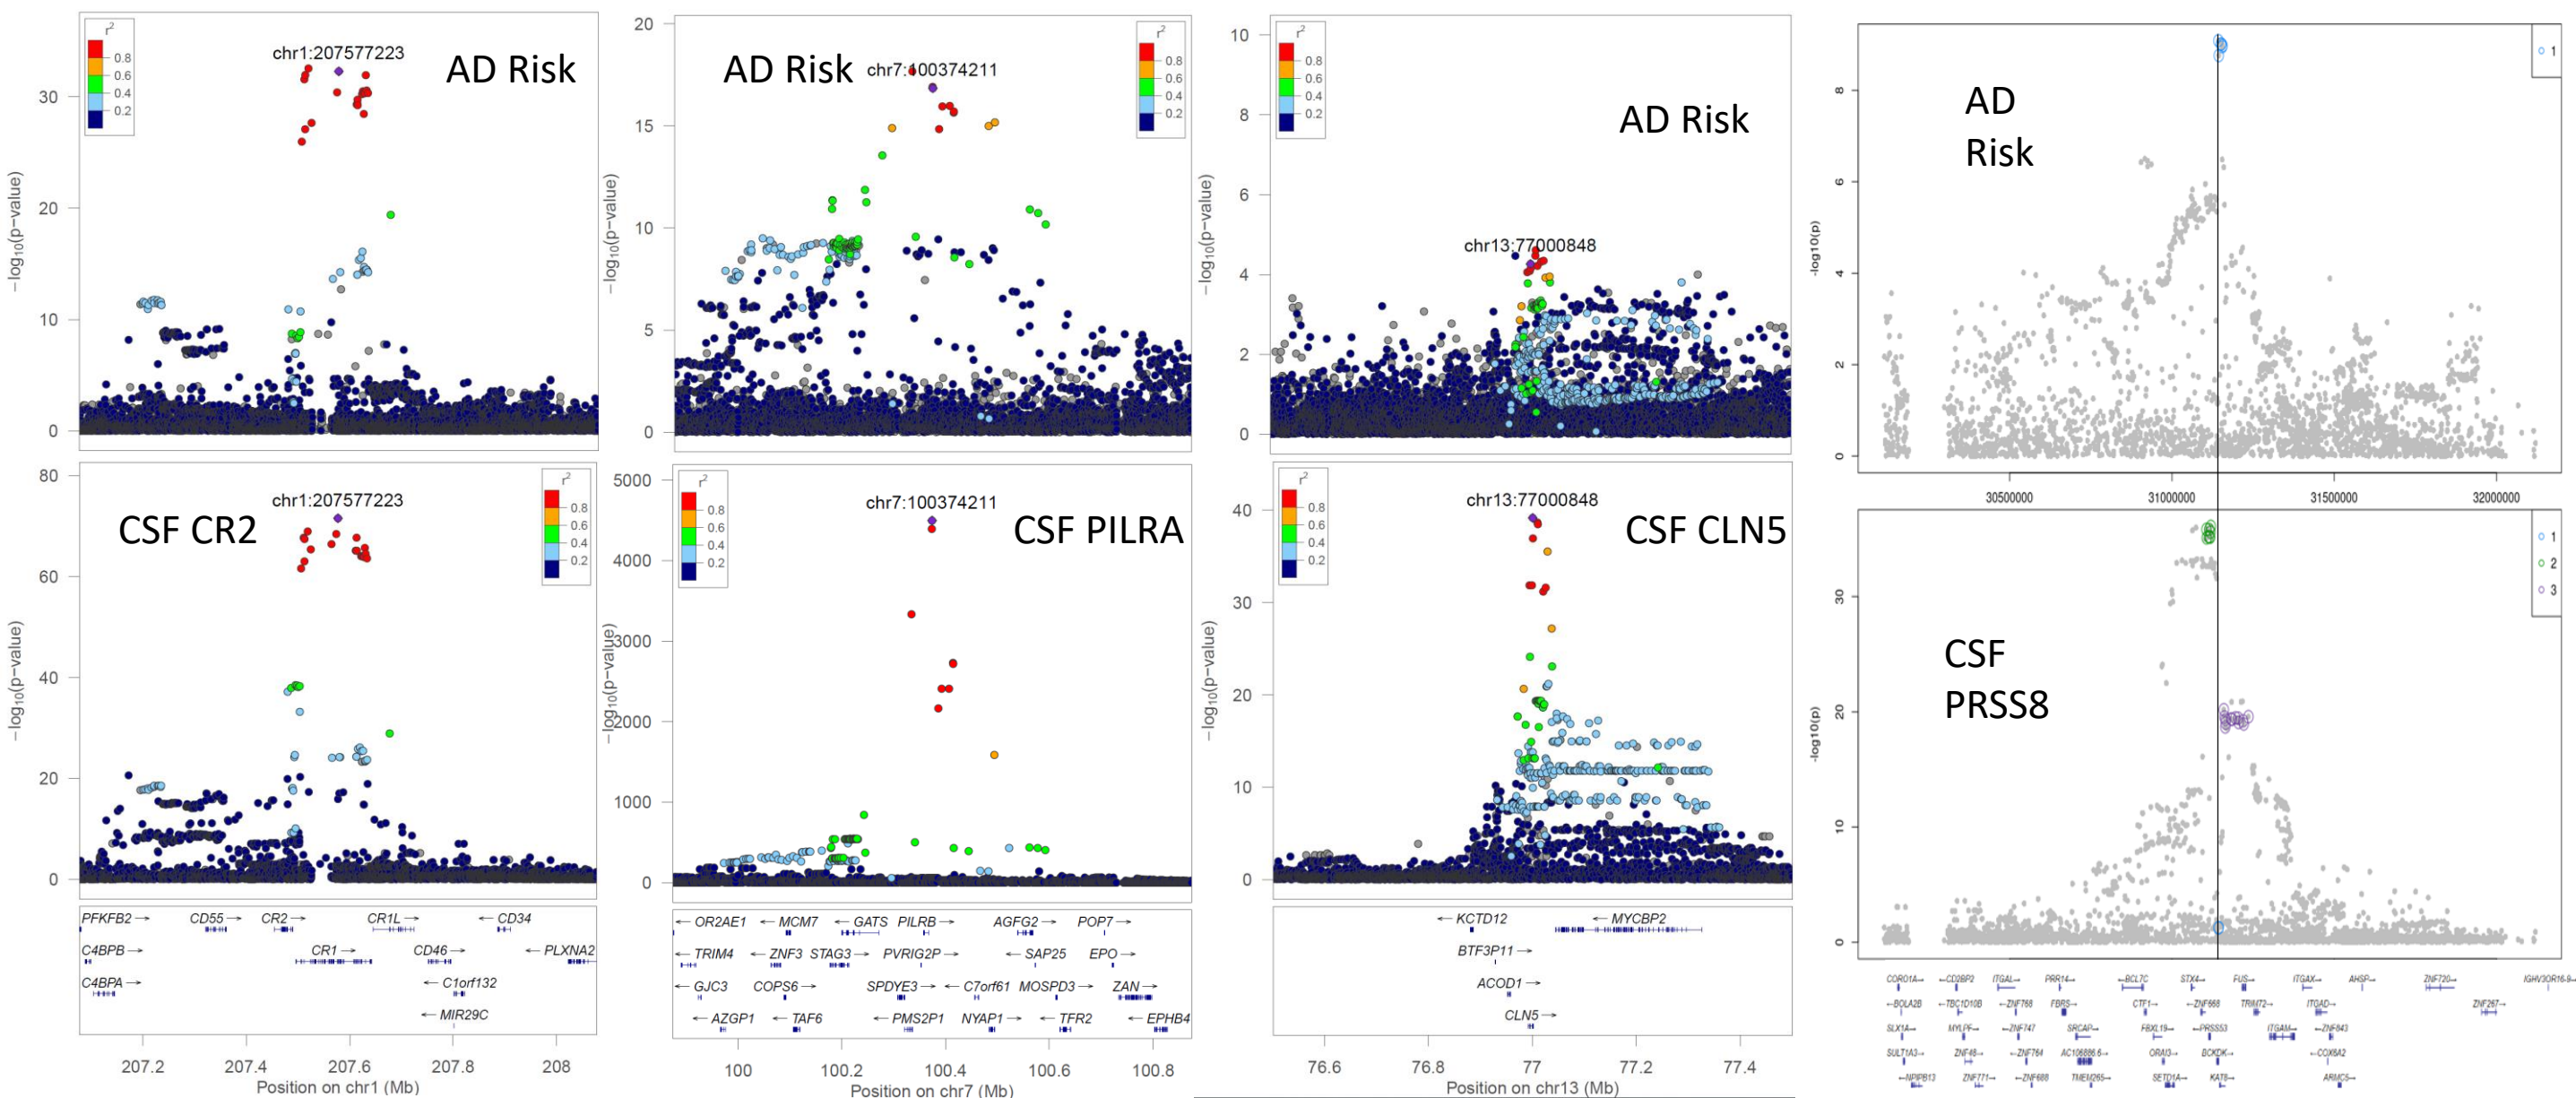

**Supplementary Figure 22: Local plots of selected pQTL signals. A.** Local plots showing the association with AD and with CR2 protein levels at chr1:207577223. **B.** Local plots showing the association with AD and with PILRA protein levels at chr7:100374211. **C.** Local plots showing the association with AD and with CLN5 protein levels at chr13:7700848. **D.** Local plots showing the association with AD and three credible sets of causal variants associated with PRSS8 protein levels. The index AD variant in this region is at chr16:31111250.

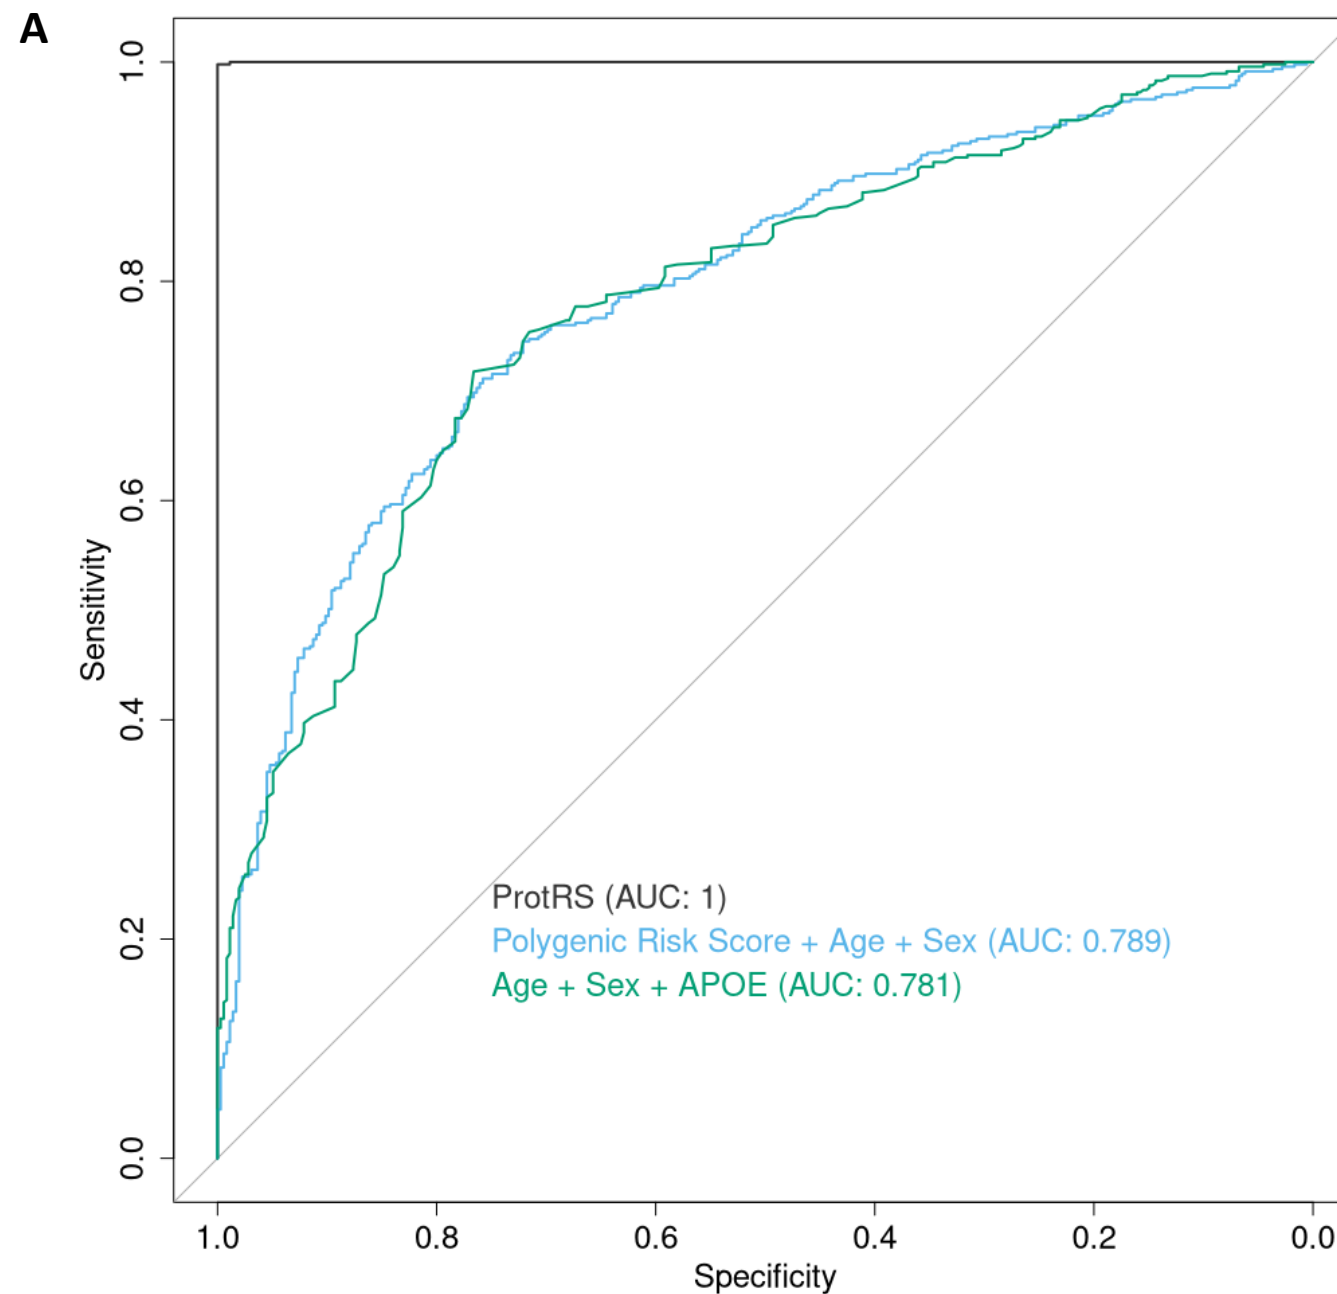

**Supplementary Figure 23: Proteomic risk score analysis using all PWAS-associated proteins. A.** Receiver-operator characteristic curve for prediction of AT-status in the training dataset.  $N(A+T+) = 471$ ;  $N(AT-) = 355$ . Black: model including proteomic risk score from 456 aptamers. Blue: model including polygenic risk score calculated using PRSice with AD-associated variants at  $P < 5 \times 10^{-8}$  (incl. *APOE* region) with age and sex. Green: model including age, sex, and *APOE* genotype. **C.** ROC curves for *APOE* genotype-stratified prediction of AT-status. All ProtRS ROC curves shown were calculated using the proteomic risk score calculated from 456 aptamers, age, and sex. **D.** ROC curves for age-stratified prediction of AT-status. All ProtRS ROC curves shown were calculated using the proteomic risk score calculated from 456 aptamers and sex.
