# Supplementary material for: Proteogenomic analysis of human cerebrospinal fluid identifies neurologically relevant regulation and informs causal proteins for Alzheimer’s disease
Source: Research Square preprint supplement (doi:10.21203/rs.3.rs-2814616/v1), 2023-06-09
Supplement: Supplementary file 2 [file ae322abbf957692bcc2dad6b.docx]

**Proteogenomic analysis of human cerebrospinal fluid identifies neurologically relevant regulation and informs causal proteins for Alzheimer’s disease**

Daniel Western, Jigyasha Timsina, Lihua Wang, Ciyang Wang, Chengran Yang, Bridget Phillips, Muhammad Ali, Aleksandra Beric, Priyanka Gorijala, Pat Kohlfeld, John Budde, Allen Levey, John C. Morris, Richard J. Perrin, Agustin Ruiz, Marta Marquié, Mercè Boada, Itziar de Rojas, Jarod Rutledge, Hamilton Oh, Edward N. Wilson, Yann Le Guen, Ignacio Alvarez, Miquel Aguilar, Dominantly Inherited Alzheimer Network (DIAN), the Alzheimer’s Disease Neuroimaging Initiative (ADNI), Michael D. Greicius, Pau Pastor, David J. Pulford, Laura Ibanez, Tony Wyss-Coray, Yun Ju Sung, Carlos Cruchaga

**Extended materials and results**

**Extended Methods**

**Proteomics Quality Control – 7K Samples**

In total, 3,065 CSF samples from ADNI (N = 948), Barcelona-1 (232), DIAN (495), FACE (632), and Knight-ADRC (N= 948) were sent for proteomics measurement on the SOMAscan 7K panel1.

Starting with the 3,065 samples and 7,584 aptamers, quality control was performed in a stepwise manner using the same protocol for all cohorts. First, scale factor was calculated per plate for each aptamer. These values were then compared to the median scale factor per plate for all aptamers. If the maximum difference between the aptamer scale factor and the median scale factor for any plate was greater than or equal to 0.5, the aptamer was removed. Aptamer coefficient of variation was then calculated per plate (defined as the standard deviation of the aptamer level across each plate’s five calibrator samples divided by the mean aptamer level in the five calibrator samples per plate). If the maximum scale factor difference from any plate was greater than 0.5 or the median coefficient of variation across all plates was greater than or equal to 0.15 for an aptamer, that aptamer was removed. These filtering steps for consistency across plates removed 291 aptamers by scale factor and 18 aptamers by coefficient of variation, leaving 3,065 samples and 7,293 aptamers.

Next, aptamer values were log10-transformed and the interquartile range was calculated for each aptamer. For each aptamer, all samples whose values were greater than the value corresponding to 1.5×IQR + the third quartile or were less than the first quartile – 1.5×IQR had the values changed to NA. This removed, from each individual, aptamer values that were extreme values that may have been mismeasurements. While no aptamers or samples were removed here, 2.66% of all individual measurements (N = 593,517) were replaced with NA.

Next, using the log10-transformed aptamer levels, call rate was performed first on the aptamers and then on the samples using a 65% threshold. All aptamers had at least 65% call rate, so all 7,275 were kept at this step. On the sample level, 21 samples had a call rate below 65% and were removed, leaving 3,044 samples remaining. Call rate was then recalculated at both the aptamer and sample level and a more stringent 85% cutoff was applied. Using the more stringent threshold, seven aptamers were removed, leaving 7,268 remaining, and 62 additional samples were removed, leaving 2,982 remaining. One additional sample was removed as it represented a duplicate of another sample, leaving 2,981.

After all quality control filtering steps, 7,268 aptamers and 2,981 samples remained. We further removed 240 aptamers that measured proteins from non-human organisms, leaving a total of 7,028 aptamers and 2,981 samples after all proteomics filtering steps. Filtering steps are summarized in Supp. Fig. 1A.

**Proteomics Quality Control – 5K samples**

Samples obtained from PPMI were measured using the SOMAscan 5K panel2, so they were cleaned separately from the other samples. In total, 1,158 samples were assayed for measurements of 4,785 aptamers. Because scale factor and coefficient of variation supplied by Somalogic, were not available for these samples, those filtering steps could not be performed. Otherwise, quality control based on IQR and call rate were performed identically to the above samples. Based on IQR, 4% of data points (N = 225,003) were replaced with NA values. Call rate filtering based on a 65% threshold removed no aptamers and 34 individuals, leaving 4,785 aptamers and 1,124 samples remaining. More stringent filtering based on an 85% threshold removed two aptamers and 49 samples. The final post-QC matrix consisted of 4,783 aptamers measured in 1,075 samples. Filtering steps are summarized in Supp. Fig. 1B.

**Genotyping quality control**

Samples from ADNI, Barcelona-1, DIAN, FACE, and Knight-ADRC were genotyped using various arrays and were cleaned and imputed separately. Samples from PPMI underwent whole-genome sequencing. Each set of genotyped variants was first filtered using call rate ≥ 98% per SNP and individual, MAF ≥ 0.01, and Hardy-Weinberg Equilibrium (HWE) P ≥ 1×10-6. Imputation for the samples genotyped by arrays was then performed using GRCh38 Version R2 on the TOPMED imputation server. Post-imputation filtering based on minor allele count ≥ 10, call rate ≥ 90%, and HWE P ≥ 1×10-6 was performed after merging all samples. Ambiguous SNPs (A:T, G:C and vice versa) were then removed due to genotyping array strand differences.

Through matching to the QCed proteomics data, 3,581 samples were kept. To select non-Hispanic White (NHW) individuals to carry forward for analysis, we performed principal component analysis using PLINK1.93 with call rate ≥ 94%, MAF ≥ 0.02, and HWE P ≥ 0.00005, the “indep-pairwise” flag with parameters 1500 KB, 30 step width, and R2 of 0.3, and the “pca” flag. Using samples from the 1000 Genomes Project as anchors for ancestry grouping and outlier removal, NHW samples were selected step-wise first using thresholds of gPC1<.005 and gPC2 >-0.01 (Supp. Fig. 2A). More stringent filtering was performed, removing any remaining samples that were outside of three standard deviations from the mean for gPC1 and gPC2 from the remaining samples. This corresponded to thresholds of gPC1 < 0.0035 and gPC2 > -0.0021 (Supp. Fig. 2A). After PCA-based filtering, 3,328 samples were kept. The removed samples consisted of 45 from ADNI, 6 from Barcelona-1, 58 from DIAN, 12 from FACE, 93 from Knight-ADRC, and 39 from PPMI.

To prevent related samples from being included, we next performed Identity By Descent (IBD) analysis on the 3,328 samples. Using PLINK1.93, IBD was calculated using the “genome” command with the filters of MAF ≥ 0.15, call rate ≥ 0.98, HWE P ≥ 0.001, and R2 of 0.2. A PI_HAT threshold of 0.25 was used to define related sample pairs. A total of 375 related pairs were identified, and 221 samples were removed to prevent any related pairs from being included. This corresponded to 1 sample from ADNI, 162 from DIAN, 3 from FACE, 29 from Knight-ADRC, and 26 from PPMI. After filtering based on IBD, 3,107 samples remained and were used for analysis. In total, 10,349,302 variants were analyzed for each of discovery and replication.

**Extended Results**

**Discovery pQTL analysis**

Using the ADNI, FACE, and PPMI cohorts, we performed association analysis using PLINK23 analyzing 7,559 aptamers (some present in the SOMAscan5k panel do not overlap with the 7K panel and were analyzed here but excluded from the meta-analysis) in 1,912 samples. We used linear regression using an additive model accounting for age, sex, the first ten genetic principal components, and a dummy variable encoding combined cohort and genotyping array as covariates. The full model (used for all aptamers present in both panels) is as follows:

For aptamers present only in the 7K panel, one cohort-Array covariate was removed to prevent collinearity; for aptamers present only in the 5K panel, no cohort-Array covariate was included because only PPMI samples had measurements of those aptamers.

In the discovery analysis, we identified 307,850 total genome-wide significant variants across both *cis* and *trans*. After adjusting the *trans* threshold to the more stringent study-wide value, 243,933 variants remained significant. Grouping variants by chromosome and by aptamer identifies 4,358 genome-wide associations for 3,215 aptamers or 1,638 associations for 1,555 aptamers using the more stringent study-wide threshold (Supp. Fig. 3A & 3B).

**Replication pQTL analysis**

Using the Barcelona-1, DIAN, and Knight-ADRC cohorts, we performed association analysis using PLINK23 analyzing 7,028 aptamers in 1,195 samples. We used linear regression using an additive model accounting for age, sex, the first ten genetic principal components, and a dummy variable encoding combined cohort and genotyping array as covariates. The full model (used for all aptamers present in both panels) is as follows:

In the replication analysis, we identified 222,601 genome-wide significant variants for 2,664 aptamers across *cis* and *trans* associations. Using the more stringent study wide *trans* threshold of 3.45×10-11, 182,639 variants remained study-wide significant for 1,242 aptamers. Clumping associations per aptamer by chromosome leaves 3,997 genome-wide associations for 2,664 aptamers and 1,337 associations for 1,242 aptamers at study-wide significance (Supp. Fig. 4A & 4B).

**Meta-analysis**

Using the summary statistics obtained from the discovery and replication analyses, we performed meta-analysis using METAL’s inverse variance weighted (IVW) approach4. We used stringent filtering criteria to define significant associations in the meta-analysis. Variant-aptamer associations need to reach P < 0.005 in discovery and P < 0.05 in replication, have consistent effect directions between discovery and replication, and reach study-wide significance (P < 5×10-8 for *cis* associations and P < 5×10-8/1450 for ­*trans*). The *trans* threshold was determined by calculating the number of proteomics principal components necessary to determine 95% of the variance between individuals and dividing genome-wide significance by that value.

In total, we identified 373,668 study-wide significant variant-aptamer associations in the meta-analysis. To identify independent pQTL associations, we first grouped variants using a distance-based approach starting with the most-significant variant for each aptamer. All other significant variants within 1MB in either direction of that variant were clumped under the same association, and if any study-wide significant variants for that aptamer remained the process was repeated for the next most-significant variant. After the clumping was performed, we then used the filtering criteria described above to filter associations. After all filtering steps, 2,316 pQTL associations for 1,961 aptamers remained.

**Additional Replication of pQTL associations in third Somalogic 5K dataset**

To add further confidence in our associations, we utilized a dataset consisting of samples from the Stanford ADRC (SADRC) and Stanford Aging Memory Study (SAMS) study that used the SOMAscan5K panel and also included genomic data. After filtering samples based on proteomics and genomics quality control consistent with our own data (Supp. Fig. 6A&B), 183 samples that had both proteomic and genomic data were analyzed. We first determined the aptamers that overlapped between our significant pQTL associations and the external dataset, then performed pQTL analysis on only the index pQTL variants for those aptamers. We were able to test 1,676 of 2,316 total index pQTL variants (1,408 of 1,961 aptamers). We then compared the correlation of effect sizes between our analysis and the analysis using the external data to determine the consistency of our associations.

We observed a very high correlation of effect sizes (*R* = 0.92, Supp. Fig. 6C), lending even more confidence to our conservatively selected associations. We observed consistent effect directions for 1,608 of the tested associations (95.9%), supporting the high correlation of effect sizes. Of the 68 associations that showed discordant effect directions, 48 have a p-value greater than 0.5 in this dataset, suggesting a high degree of variability in the effect estimates due to low sample size. The only association to reach nominal significance (P < 0.05) with opposite effect direction in the external replication data was rs483082 (MAF 0.276) for GGT2, a protein that is predicted to be nonfunctional due to failed cleavage to an active product5. We note that replication using other antibody and mass spectrometry-based techniques is necessary.

**Conditional Analysis**

We utilized conditional and joint analysis as implemented in GCTA-COJO6 to identify conditional pQTL associations that were independent of the index pQTL variant for each region. We converted our summary statistics files from the meta-analysis to the GCTA format then supplied each file to GCTA. We included the BED file used to perform pQTL analysis for discovery and replication and subset that to include all 3,107 samples that were analyzed. The p-value threshold was specified depending on the location of each index pQTL variant. If the index variant was in *cis,* the p-value threshold was set to 5×10-8. If the variant was in *trans*, the threshold was set to 3.45×10-11 (5×10-8/1,450, matching all other *trans* thresholds).

We identified 3,373 conditionally independent pQTL associations for the 1,961 aptamers, representing an additional 1,057 associations compared to using index variants only (Supp. Fig. 5H). The majority of aptamers (1,137, 58%) had one association, 487 (24.8%) had two, and 193 (9.8%) had three. A total of 64 aptamers had five or more conditionally independent associations, with GSTM1 having the most independent associations (eleven) near its *cis* locus with index pQTL variant rs11807 (P = 2.95×10-62). Additionally, there are ten conditionally independent associations for CD177 at its *cis* locus, with its index variant at rs144661431 (P = 1.82×10-39). There is a weak correlation between the strength of the index pQTL association and the number of conditional associations (Pearson *R* = 0.16).

We used VEP to assign variant annotations to each of the conditionally significant variants. Using PLINK and our European samples, we identified all variants in LD (*R2* > 0.8) with each conditionally significant variant and used all the variants as input to VEP. We then matched each variant to the most severe annotation of any of the variants in LD. Of the 3,373 variants, 32 were annotated as high severity, 799 as moderate, 115 as low, and 2,388 as modifier. There were 39 variants where no annotation was found for any variant in LD. The variant annotations are summarized in Supp. Fig. 8D and Supp. Table S7. Variant annotations for all variants in LD are in Supp. Table S9. We also checked for enrichment of annotation categories by randomly selecting (with replacement) a subset of 3,373 variants to match the 3,373 conditionally independent significant variants we identified. We repeated this 1,000 times and determined the most severe annotation for each matching the methodology for the true pQTL variants. We then determined the p-value for enrichment by the number of permutations (out of 1,000) that had equal or fewer annotations of each type compared to the actual pQTL variants. We observed enrichment in the pQTLfor missense variants, where all random permutations had fewer than the actual data (P < 0.001), as well as for polypyrimidine tract (P < 0.001), splice donor (P < 0.001), splice region (P = 0.003), start-lost (P < 0.001), stop-gained (P < 0.001), stop-lost (P = 0.007), synonymous (P < 0.001), upstream/downstream (P < 0.001), and UTR variants (P < 0.001). There was a likely depletion for intergenic (P > 0.999), intronic (P > 0.999), and non-coding variants (P = 0.962). Overall, we observed an enrichment for protein-altering variants (P < 0.001) and likely depletion for all types of noncoding variants (P > 0.999). A summary of the annotations from each permutation can be seen in Supp. Table S10 and comparisons between the pQTL variants and the permuted data can be seen in Supp. Fig. 8D.

Using the conditionally independent variants, we sought to determine if there was a correlation between severity of the variant annotation and pQTL effect size. We correlated the absolute value of the pQTL effect size with the grouping of each variant annotation (1 = High severity, 2 = Moderate, 3 = Low, 4 = Modifier). As expected, we observed a positive correlation between annotation severity effect size (*R =* -0.24 for highest to lowest severity, P < 2.2×10-16, Supp. Fig. 8E). This was consistent across both *cis* (*R* = -0.26, Supp. Fig. 8F) and *trans* (*R* = -0.28, Supp. Fig. 8G) pQTL variants. Overall, the mean absolute effect size for high severity variants is 0.88, for moderate variants is 0.71, for low variants is 0.55, and for modifier variants is 0.48. As expected, variants predicted to have more severe deleterious effects by VEP are also to found to have larger effects on protein levels in CSF.

**Disease-specific QTL**

Because the dataset is enriched for individuals with Alzheimer’s disease, we performed pQTL analysis in CSF amyloid/tau negative (AT-, N = 889) and amyloid/tau positive (AT+, N = 775) individuals independently, using the same covariates as in the full models (age, sex, 10 gPCs, and cohortArrays). We observed very high concordance between disease states (*R* ≥ 0.98, Fig. 2E), suggesting that CSF pQTL associations are largely agnostic to disease status. However, within the study-wide significant index variants, we did identify 114 associations with P > 0.05 in AT+ individuals and 104 with P > 0.05 in AT- individuals, of which 72 did not reach nominal significance in either dataset (Supp. Table S5). Of those 72, 68 of them have associations in the *APOE* region.

We also identified six (two *cis* and four *trans*) associations that reached suggestive significance (P < 1×10-5) in AT+ individuals and were not nominally significant in AT- (P > 0.05). Each of the four *trans* associations (for CRP, PRG3, DFFA, and DNAJB9) observed in AT+ but not AT- had index variants at chr19:44908684 (rs429358), corresponding to the *APOE* ε4 variant position that is the strongest genetic risk factor for late-onset AD. The two *cis* associations corresponded to the T allele at chr7:150554724 (rs7316178) associated with increased levels of GIMAP4 (β = 0.184) and the T allele at chr6:31836952 (rs1196840) associated with decreased levels of HSPA1A (β = -0.225). Evidence suggests GIMAP4 is upregulated in AD7 and it is highly expressed in T lymphocytes8, suggesting a possible immune role potentially relevant for AD. Heat shock proteins, especially HSPA1A, help to protect neurons against stress9 and they are involved in promoting proper protein folding of tau10, an instrumental process dysregulated in AD. DNAJB1 is the only one of these six that passes the study-wide threshold in AT+ specifically (P = 1.23×10-14).

Finally, we identified 16 (nine *cis* and seven *trans*) associations reaching suggestive significance in AT- but not nominally significant in AT+ (Supp. Table S5). Unlike the six above, no index pQTL variant was shared for these 16 associations. We observed associations in biomarker negative (AT-) individuals only for HSPG2 and HS2ST1 on chr1, DBI and LRTM1 on chr2, MST1 and PDXP on chr3, IL18RAP on chr6, CNP and GNAI1 on chr7, LRIT2 on chr10, MDK on chr11, SNX11 and TIMP2 on chr17, and ENG, SMAP1, and PGLYRP1 on chr19. HSPG2 encodes perlecan (a heparin sulfate proteoglycan), HS2ST1 encodes heparin sulfate 2-O-sulfotransferase 1, and midkine is a heparan sulfate binding protein11. Perlecan is known to interact with amyloid beta, suggesting a role in AD12. Of these 16 associations, two reach the study-wide threshold in AT- alone while not reaching nominal significance is AT+ (SNX11, P = 9.55×10-10; LRIT2, 5.66×10-10). While our stringently-filtered meta-analysis index variants are highly consistent across disease states overall, we observed six associations biased towards AT+ samples and 16 biased towards AT- samples.

This suggests that disease-specific and biomarker negative-specific regulation of protein levels in CSF does occur, and a full genome-wide scan may uncover associations masked in the overall analysis that are significant for one group. We note that some of these AT+ pQTL are either associated with *APOE* genotype or are potentially relevant to AD, while multiple of the AT- pQTL are for proteins involved with heparan sulfate, suggesting there are consistent pathways that are dysregulated in disease. As the AT- and AT+ associations were obtained from a joint analysis, it will be important to replicate these in an external dataset. Additionally, we only analyzed the index variants; a full disease-stratified analysis will be necessary to identify more biased associations, but those analyses are outside the scope of this study as larger dataset are needed.

**Pleiotropy in genetic regulation of protein levels**

To group index variants into regulatory regions, we used a linkage disequilibrium threshold of *R2* ≥ 0.1. We identified 194 total regions that regulated at least two proteins (271 regulating two aptamers; Fig. 2B, top; Supp. Fig. 5D; Supp. Table S24). Of these, 27 regions regulated at least five proteins, seven regions at least ten, and three regions (discussed in the main text) at least 50. Here, we will detail a few of the other regions showing interesting biology.

First, we identify a 400KB region spanning from chr1:196695521 to chr1:197133615 where ten unique index variants in six LD blocks (R2 threshold of 0.5) are associated with the levels of 14 proteins (ZNF23, TST, CFH, DLL3, NAGLU, CFHR1, PRLR, HPX, CFHR4, C3, CFHR2, F13B, CFHR5, and F13A1|F13B), 7 of which are *trans* (ZNF23, TST, DLL3, NAGLU, PRLR, HPX, and C3). Six of the proteins (CFH, CFHR1, CFHR4, C3, CFHR2, and CFHR5) are directly related to the complement system, and five of those proteins are *cis* associations. Each of the complement factor H family proteins binds to C3, supporting the *trans* regulation of that protein in the region13. Of the 14 proteins associated with this region, eleven (ZNF23, TST, CFH, NAGLU, CFHR1, PRLR, CFHR4, C3, CFHR2, F13B, and CFHR5) are also associated with variants in this region in plasma14. There is little cell type overlap, as ZNF23 is specific to neurons, TST to astrocytes, CFH, CFHR1, and DLL3 to endothelial cells, and C3 and F13A1 to microglia/macrophages. The others are not cell-type specific (Supp. Table S25).

We identified a 4KB region spanning from chr14:94378225 to chr14:94382210 where five unique index variants in three LD blocks are associated with the levels of 13 proteins (CDC42BPA, SNAP25, REEP2, DCP1B, CASS4, MRPL33, CDKL2, GSK3B, NCF2, PLA2G12A, SERPINA1, PCK2, and GALK1), of which all but SERPINA1 are in *trans*. Eight proteins (CDC42BPA, SNAP25, REEP2, DCP1B, CASS4, MRPL33, CDKL2, and GSK3B) are associated with missense variant rs1303 (p.E400D), three (NCF2, PLA2G12A, and SERPINA1) with missense variant rs28929474 (p.E366K), and one (PCK2) with missense variant rs6647 (p.V237A), all in *SERPINA1*. *SERPINA1* is a member of the SERPIN serine protease family that covalently binds to enzymes to inactivate them. One of these missense variants, rs28929474, causes deficiency of SERPINA1 leading to tissue breakdown due to an inability to inhibit this protein’s protease targets15. Of the *trans-*associated proteins, CDC42BPA, CDKL2, and GSK3B are all serine-threonine kinases and CASS4 is a regulator of tyrosine kinase binding, suggesting a potential role of SERPINA1 in regulation of kinase abundance in CSF. Of the proteins associated with this region, at least seven (CDC42BPA, SNAP25, DCP1B, MRPL33, NCF2, SERPINA1, and GALK1) are also associated with variants in this region in plasma14. Cell-type specificity highlights neuronal origin of SNAP25, MRPL33, CDKL2, and GSK3B, while CASS4, NCF2, and SERPINA1 were microglia/macrophage-specific (Supp. Table S25).

A 44KB region from chr7:22788817 to chr7:22832663 includes eight index pQTL variants in two LD blocks associated with eleven proteins (IL34, IL6, CNP, COLGALT1, DVL2, TNFSF13B, IL12RB2, EBI3, HAMP, IL12A|EBI3, and RNASE3). All proteins except for IL6 are associated in *trans*. None of the associated variants in this region are missense. Immune response is regulated through this region, emphasized by the regulation of five members of the interleukin family (IL34, IL6, IL12RB2, EBI3, and IL12A|EBI3). TNFSF13B is also a cytokine and HAMP expression is heavily dependent on IL616. Interestingly, this region does not have any associations in plasma14, suggesting it may be CSF-specific. Supporting the immune response relevance of the region, five proteins (TNFSF13B, EBI3, HAMP, COLGALT1, and RNASE3) were found to be specific to microglia/macrophages (Supp. Table S25).

There is a 403KB region from chr12:39994307 to chr12:40397605 that houses five index variants in four LD blocks for ten unique proteins (HLA-DQA2, GPNMB, TLR3, ENTPD1, TMEM106A, ITGB2, CD68, GRN, C1QTNF1, and SDCBP2). This region includes the *LRRK2* gene and has been discussed previously using this dataset for its relevance to Parkinson’s Disease17. The region is involved in immune response, as seven proteins (HLA-DQA2, TLR3, ENTPD1, TMEM106A, ITGB2, CD68, and GRN) were specific to microglia/macrophages (Supp. Table S25).

A 53KB region spanning chr1:230680714-chr1:230733279 contains four index variants in two LD blocks associated with ten proteins (CASP10, TGFBI, SPRN, SLIT3, PUS7, PGK1, TPMT, RFESD, TG, and HRAS). Four proteins (SPRN, SLIT3, PUS7, and PGK1) have an index variant at rs4762 (p.T198M), a missense variant in *AGT*, that is associated with multiple cardiovascular traits18,19. None of the four associated proteins have obvious functions similar to those reported for AGT. TGFBI, SPRN, and RFESD are also associated with this region in plasma14. The proteins in this region were largely not cell type-specific, with only TGFBI (microglia/macrophage), SLIT3 (endothelial), PUS7 (neuron), and HRAS (endothelial) showing a cell type bias (Supp. Table S25).

We identified an 18KB region from chr9:133255935 to chr9:133273813 that contains seven unique index variants in two LD blocks for nine unique proteins (ROBO4, CDH17, SELE, REG1B, FAM3D, ALPI, REG1A, PNLIP, and ABO). This region is centered on *ABO*, a highly pleiotropic locus in plasma that regulates the levels of 190 proteins14. *ABO* is relevant in the definition of an individual’s blood level, supporting its relevance to the levels of many different blood-relevant proteins. ROBO420 and SELE21 have clear functions in the blood. Of these nine proteins, eight are also associated with the region in plasma14 (CDH17, SELE, REG1B, FAM3B, ALPI, REG1A, PNLIP, and ABO). Interestingly, ROBO4 does not have an association in the region in plasma even with its clear functional links to blood. The region is enriched for associations in blood (190 vs 9, P = 0.003), highlighting tissue-specific regulation between plasma and CSF. Two proteins were specific to endothelial cells (ROBO4 and SELE) but the rest were not specific to a brain cell type (Supp. Table S25).

On chromosome 16, we identified a 1.2KB region spanning chr16:5024424-5025632 that contained four index variants in two LD blocks for seven proteins (SGSH, IDUA, GNS, NAGPA, TPP1, SMPD1, and PLOD2). This is a *cis* association for NAGPA and five proteins (SGSH, IDUA, GNS, SMPD1, and PLOD2) are in LD with or have an index variant that is a missense variant in *NAGPA* (rs7188856, p.T465I). NAGPA is involved in the removal of glucosamine residues lysosomal hydrolases to allow mannose to recognize them22. GNS and SGSH are both members of the sulfatase protein family and both are involved in the degradation of heparan sulfate in the lysosome, as is IDUA23-25. TPP1 and SMPD1 are also involved in lysosomal degradation and defects in either one lead to disease26,27. Clearly, NAGPA has an important role in lysosomal function, but the protein itself has not been linked to lysosomal disorders. In plasma, there are also associations for NAGPA and TPP1 but not for SMPD1, PLOD2, IDUA, or GNS, suggesting this may be a more important locus in the nervous system. The diseases caused by defects in these genes also suggest that, as their symptoms are largely neurological. Interestingly, four of the proteins (SGSH, TPP1, SMPD1, and PLOD2) were specific to astrocytes, while NAGPA (the only *cis* association) was biased towards neuronal expression (Supp. Table S25).

These examples demonstrate the benefits of a genome-wide approach to QTL mapping. We highlighted numerous loci that regulated proteins in the same pathway, potentially identifying master regulators that may contribute to relevant traits. These potential protein-protein interactions may be involved in protein localization or post-translational processing and likely are vital to fully understanding human health and disease.

**Identification of proteins associated with AD through PWAS**

We performed a proteome-wide association study using the FUSION workflow28 to identify proteins associated with Alzheimer’s disease risk. Because of the strength and number of our *trans* associations, we utilized the approach to analyze both *cis* and *trans* associations. Through this approach, we identified 473 protein-region pairs that were significantly associated with AD at FDR P < 0.05, corresponding to 456 unique aptamers and 440 unique proteins (Supp. Table S33). Of the 473 associations, 81 included *cis* pQTL associations and the remaining 392 included *trans* associations. We ran pathway analysis in GO, Reactome, DisGeNet, KEGG, and Disease Ontology using clusterProfiler29, DOSE30, and ReactomePA31 to determine if these proteins were enriched for any biological processes. The 440 proteins identified were enriched only in Extrapyramidal Sign (DisGeNet: C0234133, P = 4.25×10-6, Supp. Fig. 15, Supp. Table S34).

Because of the strength of the association between *APOE* and AD as well as the amount of pleiotropy in the *APOE* region, 338 of the significant PWAS associations were driven by associations in the *APOE* region(Supp. Fig. 16, Supp. Table S33, those with BEST.GWAS.ID = chr19:44908684:T:C). As these may be clouding the relevance of the PWAS-associated proteins, we removed these and reran pathway analysis. After removal, 135 associations for 112 proteins remained. In contrast to the pathway enrichment results including the *APOE* region, performing the analysis using the reduced number of proteins showed strong enrichment for pathways involved in immune function and the complement system (Supp. Fig. 17, Supp. Table S35), including autoimmune diseases (DisGeNet: C0004364, P = 8.28×10-6), complement system (GO:0006956, P = 6.52×10-8), and adaptive immune response (GO:0002250, P = 7.50×10-7). This supports a strong role of immune activation and function in the etiology of AD. The 337 proteins associated with the *APOE* locus (excluding NECTIN2, which was significant by PWAS but was found to be independent in our locus mapping) were all also associated with AD through PWAS (Supp. Fig. 16, Supp. Table S33). Of these proteins, 122 also colocalized with AD in at least one associated locus (Supp. Tables S39 & S40). While we specifically excluded any variants associated with the *APOE* region (500KB in either direction of chr19:44908684), we identified three proteins (CD200R1L, PTPA, and CRADD) that had associations at other loci (chr1 for CD200R1L, chr9 for PTPA, and chr11 for CRADD) through which MR was still significant (Supp. Fig. 16, Supp. Table S36). The proteins associated with the *APOE* region are discussed more in the main text.

While there are numerous associations potentially relevant to AD located in pleiotropic regions (as highlighted by the *APOE* region), it is likely that some of the AD-associated proteins in these regions are results of disease and not truly contributing to it. As a result, we chose to filter the proteins by removal of all PWAS and COLOC results that were located in any region regulating five or more aptamers (as determined in Supp. Table S24). This filtering, along with limiting to proteins that overlapped with at least two of the methods, decreased the prioritized proteins to the 42 that we focused on in the main text and below.

**Shared genetic regulation between AD and CSF proteins**

Using both traditional COLOC32 and COLOC-SuSiE33, we performed colocalization analyses to identify shared genetic regulation between AD and CSF protein levels. Through single causal variant COLOC, 86 associations were shared between AD and proteins using PP.H4 > 0.8, corresponding to 77 unique proteins (Supp. Table S39). This included proteins established to be involved with AD like TREM2, IL34, CR1, and APOE, as well as many new candidates. Through the COLOC-SuSiE approach that allows multiple causal variants to affect each trait, we identified 320 shared pQTL-AD associations corresponding to 118 unique proteins, of which 42 overlapped with the single causal variant approach (Supp. Table S40). In total, 153 unique proteins (158 aptamers) shared genetic regulation with AD. Of these, 96 had a shared association in the *APOE* region, which may be clouded by an extremely significant association for AD causing issues when determining credible sets of variants. We identified 152 proteins (157 aptamers) overlapping between PWAS and COLOC (Supp. Tables S33, S39 & S40) and 17 (19 aptamers) that overlap between all three of PWAS, COLOC, and MR (Supp. Tables S33, S36, S39 & S40).

***Cis-*specific Mendelian Randomization analysis**

As a sensitivity analysis and to remove potential false positives due to horizontal pleiotropy, we performed each analysis using *cis-*only associations (if applicable; Supp. Fig. 21, *cis*-only MR in Supp. Table S43). Of the proteins with a *cis* association from the full analysis, all except APOBEC2 (25/26) were also significant in the *cis*-only analysis. We also identified two new proteins (LGALS3 and VEGFB) that were associated with AD in the *cis-*only analysis but not in the full analysis, suggesting that *trans* associations for those proteins may have decreased the statistical power because of regulation through processes not relevant to AD.

**Investigation of 42 proteins significant through at least two of PWAS, COLOC, and MR**

After removal of proteins due to pleiotropy, we identified 42 proteins that were significantly associated with AD through at least two of PWAS, COLOC, and MR (Figure 4A-D). Of these, 15 were prioritized by all three methods, 12 through PWAS and COLOC, and 15 through PWAS and MR. Here, we provide details of each of these proteins. Details of all PWAS values can be found in Supp. Table S33, single-variant colocalization in Supp. Table S39, multiple-variant colocalization in Supp. Table S40, genome-wide MR in Supp. Table S36, and *cis*-only MR in Supp. Table S43.

**Proteins prioritized by PWAS, COLOC, and MR**

We identified 15 proteins associated with AD through all three of PWAS, COLOC, and MR: FCGR3B, CR2, TREM2, PILRA, SHARPIN, CLN5, SLC25A18, CTSH, PRSS8, IL34, GRN, CST8, ACE, UMOD, and SIRPA. Of these, eleven are associated with AD through *cis* loci, three through *trans* loci, and one (TREM2) through both *cis* and *trans* loci.

The first protein, FCGR3B, has a *cis* association on chr1 (index variant rs4379692). This locus is discussed in the main text. The *cis* CR2 locus on chr1 (index variant rs679515) is associated with intronic variants in *CR1* and is also discussed in the main text. FCGR3B is linked to multiple drugs, including Cetuximab (DB00002) as discussed in the main text.

We identified two study-wide associations for TREM2, one in *cis* (index variant rs142232675, p.D87N) and one in *trans* (rs1582763, intronic in *MS4A4A*) on chromosome 11. Both of these loci are associated with AD34 and genes in the *MS4A* locus have been shown to affect levels of soluble TREM2 protein35. Consistent with previous research, higher levels of TREM2 in CSF were associated with lower risk of AD at both loci (*cis* PWAS Z = -14.47, *trans* PWAS Z = -10.03, MR β = -0.236, Supp. Tables S33 & S36). TREM2 has the most significant *cis* association with AD of any protein outside the *APOE* locus. Both loci identified also colocalize with AD risk (*cis* PP.H4 = 0.998, *trans* PP.H4 = 0.999, Supp. Table S39).

On chr7, CSF levels of PILRA are associated with a *cis* locus (index variant rs1859788, p.R78G in *PILRA*). This locus is discussed in the main text.

Consistent with the proposed candidate gene at the locus34, we identified an association between *cis-*regulated levels of SHARPIN in CSF and AD (index pQTL variant rs34173062, p.S17F in *SHARPIN)* on chr8*.* Levels of SHARPIN regulated by this locus were associated with increased risk of AD (PWAS Z = 6.98, MR β = 0.246) and the association also colocalized with AD risk (PP.H4 = 1.00). SHARPIN has been associated with tumors36 and, as mentioned in the main text, missense variants in *SHARPIN* have previously been associated with AD37, although with a different variant (rs57250141, p.G186R).

On chr13, we identified a *cis* association for levels of CLN5 (rs1800209, p.K319R). This locus is discussed in the main text.

On chr15, we identified a *trans* association for levels of SLC25A18 (rs34843303, intronic in *CTSH*). SLC25A18 is associated with increased risk of AD (PWAS Z = 4.43, MR β = 0.181) and shares genetic etiology with AD (PP.H4 = 0.96). This protein is part of a family of mitochondrial transporters that are expressed in the brain and have been linked to multiple neurological conditions38, suggesting a potential role for mitochondrial transport in AD. At this same locus, there is a *cis* association for levels of CTSH (index variant rs2289702, p.G11R in *CTSH*). As discussed in the main text, this protein is involved in lysosomal function. We observed a positive association between CTSH levels and AD (PWAS Z = 4.81, MR β = 0.04) and this locus also colocalized with AD risk (PP.H4 = 0.978). Glutamic acid (DB00142) is linked to this protein, representing a potential therapeutic as discussed in the main text.

Next, as discussed in the main text, we identified a *cis* association on chr16 for PRSS8 (index pQTL variant rs1978485) that was associated with AD. PRSS8 is linked to 1-[4-(hydroxymethyl)phenyl]guanidine (DB06900) in the DrugBank database.

Also on chr16, we observed a *cis* association for IL34 (index pQTL variant rs4985556, p.Y213*) at a stop-gained variant. This variant is also the index variant for the AD risk locus and the association colocalizes (PP.H4 = 0.971, AD GWAS P = 6.0 × 10-10). In our study, we associated levels of IL34 with decreased risk of AD (PWAS Z = -5.59, MR β = -0.06). IL34 is involved in microglial activation as discussed in the main text.

On chr17, we identified a *cis* association for GRN (index pQTL variant rs5848) that again matches the index AD risk variant at the locus and colocalizes with AD (PP.H4 = 1.0). Levels of GRN are associated with lower risk of AD (PWAS Z = -7.053, MR β = -0.22). GRN is involved in proper lysosomal function as discussed in the main text.

Also on chr17, we identified two associations near *ACE* that were both associated with AD. First, levels of ACE were associated in *cis* with the locus (index pQTL variant rs4326, p.Y115*). This association just reached the threshold for colocalization (PP.H4 = 0.817) and levels of ACE were associated with decreased risk of AD (PWAS Z = -9.04, MR β = -0.206). ACE is linked to degradation of Aβ, supporting its protective effect against AD39. Numerous ACE inhibitors exist, including Benazepril (DB00542) and Captopril (DB01197). Also associated in *trans* with variants near *ACE* is CST8 (index pQTL variant rs4459609). The association for CST8 colocalizes with much higher probability with AD risk compared to ACE itself (PP.H4 = 0.993 for CST8 vs 0.817 for ACE), suggesting ACE may play a role through regulating the levels of other proteins as well. Like ACE, higher CSF levels of CST8 were associated with decreased risk of AD (PWAS Z = -8.43, MR β = -0.35). As discussed in the main text, members of the cystatin family like CST8 are involved in suppression of cathepsin signaling, and we identified a cathepsin family member (CTSH) increasing risk for AD. This link between ACE and CST8 has only been established through the unbiased genome-wide method that we have utilized, highlighting potential protein interactions that even in cell-based approaches can be difficult to uncover.

We next identified a *trans* association between levels of UMOD and a missense variant in *SIGLEC9* (rs2075803, p.K100E). *Trans*-regulated levels of UMOD are associated with increased risk of AD (PWAS Z = 4.37, MR β = 0.051) and the association also colocalizes with AD (PP.H4 = 0.911). UMOD is the most abundant protein in healthy urine40 and has been linked to the unfolded protein response41, which is proposed to contribute to neuronal death42.

Finally, on chr20, we identified a *cis* association for levels of SIRPA (index pQTL variant rs17855616, p.G109S in *SIRPA*) that colocalized with AD risk (PP.H4 = 0.959). Levels of SIRPA were associated with increased risk of AD (PWAS Z = 4.41, MR β = 0.032). As discussed in the main text, SIRPA is involved in microglial response to AD.

In total, we identified 15 proteins that were associated with AD through all three of PWAS, COLOC, and MR. All these proteins have functional roles that may be relevant to AD warranting further investigation.

**Proteins prioritized by PWAS and COLOC**

We also identified twelve proteins that were associated with AD through PWAS and had shared genetic etiology with AD risk through COLOC. These include six proteins (CR1, TMEM106B, EGFR, C1S, APOE, and SIGLEC9) regulated in *cis* and six (TMEM132C, ERLIN1, CASQ1, PKN1, LGALS9, and EBI3) regulated in *trans*.

***Cis* associations implicated in AD**

Starting on chr1, we identified a *cis* association between CR1 and intronic variants in *CR1* (index pQTL variant rs1752684) that colocalized with AD risk (PP.H4 = 0.961). As with CR2 that also colocalized at this locus, CR1 was associated with increased AD risk (PWAS Z = 9.47), but CR1 is not significant through MR. As discussed in the main text, it is unclear whether CR1 is the true causal gene at this locus, but both CR1 and CR2 may play a role in AD.

We found a *cis* association on chr7 for levels of TMEM106B (index pQTL variant rs1150988). This association colocalizes with AD (PP.H4 = 0.811) and higher levels of TMEM106B were associated with increased risk of AD (PWAS Z = 3.31). TMEM106B was not identified as causal through MR using all variants, but limiting the variants to *cis­*-only does identify it as significant (*cis* MR β = 0.099, P = 6.03 × 10-4). This protein is discussed in the main text for its relevance to lysosomal function and link to frontotemporal dementia.

We also identified a *cis* association on chr7 for levels of EGFR (index pQTL variant rs74504435) that colocalizes with AD risk (PP.H4 = 0.997). Levels of EGFR were associated with increased risk of AD through PWAS (PWAS Z = 6.01) and *cis­-*only MR (*cis* MR β = 0.142, P = 2.35 × 10-9), but not using all-variant MR. EGFR expression is modulated in mice by *PSEN1*, where mutations are a cause of autosomal dominant AD43. Multiple EGFR inhibitors have been identified as rescuing memory loss in animal models of AD44, supporting EGFR’s relevance to the disease.

On chr12, we identified an association for C1S (index pQTL variant rs117907409, p.D315N in *C1S*). Levels of C1S are positively associated with increased risk of AD (PWAS Z = 3.22) but variants in this region were not available in the reference genome so MR results were not available. The association does colocalize with AD risk (PP.H4 = 0.957). As discussed in the main text, C1S is a complement protein that likely functions in the immune system in AD. It is a component of C1 that is involved in synaptic loss45. It interacts with multiple drugs, including Conestat alfa (DB09228) and Gabexate (DB12831).

On chr19, we identified a *cis* association for APOE (index pQTL variant rs429358) that is the strongest risk factor for sporadic AD and is positively associated with AD through PWAS (PWAS Z = 68.2). Because part of the *APOE* genomic region was removed from the AD risk GWAS, MR using these variants was not possible and single-variant colocalization just reached our threshold for inclusion (PP.H4 = 0.805). APOE is linked to both copper (DB09130) and zinc (DB01593) and is a target for potential novel therapies.

Finally, also on chr19, we identified a *cis* association for SIGLEC9 (index pQTL variant rs2075803, p.K100E in *SIGLEC9*) that was shared with the *trans* association for UMOD discussed above. The association colocalized with AD risk (PP.H4 = 0.911) and levels of SIGLEC9 were associated with increased AD risk (PWAS Z = 3.11), but the protein was not identified as causal through MR. In the AD risk GWAS, *SIGLEC11* was also identified as the candidate gene at its *cis* locus suggesting relevance of this gene family in AD34, although we did not identify an association in CSF for the protein. As discussed in the main text, SIGLEC9 may be part of the immune disruptions observed in AD.

***Trans* associations implicated in AD**

We also identified six proteins regulated by *trans* loci that were prioritized by PWAS and COLOC. First, at the *BIN1* locus on chr2, we identified an association for levels of TMEM132C (index pQTL variant rs6733839). This is the same index variant as the AD risk locus and the association colocalizes with AD risk (PP.H4 = 0.999). As discussed in the main text, TMEM132C was associated with increased risk of AD through PWAS (PWAS Z = 20.1). However, the protein was not identified as causal through MR, potentially due to an additional *trans* variant being included in the model. TMEM132C is also associated with a *trans* locus at APOE (index pQTL variant rs429358), supporting the role of this protein in AD.

Next, we identified an association for levels of ERLIN1 on chr8 (index pQTL variant rs1693551) near *SNX31*. This association colocalized with AD risk (PP.H4 = 0.995). Levels of ERLIN1 regulated by this locus were associated with increased risk of AD (PWAS Z = 5.49). Variants in *ERLIN1* cause a form of hereditary spastic paraplegia, a disorder caused by defects in neurons involved in motor function46. ERLIN1 is implicated in endoplasmic reticulum-associated degradation, which may be interrupted by tau accumulation46,47.

We additionally identified an association for levels of CASQ1 with intronic variants in *C1S* (index pQTL variant rs10849546) that colocalized with AD (PP.H4 = 0.951). Levels of CASQ1 were associated with decreased risk of AD (PWAS Z = -4.47), but MR was not possible because the variants in the region were missing from the reference genome. CASQ1 is a calcium-binding protein typically identified in muscle cells48. While a direct role for CASQ1 in AD has not been identified, dysregulation of calcium signaling has been linked to Aβ aggregation49. An additional association at the *C1S* locus for levels of PKN1 was also identified (index pQTL variant rs7183) that colocalized with AD risk as well (PP.H4 = 0.955). As with CASQ1, levels of PKN1 were associated with decreased risk of AD (PWAS Z = -4.48). PKN1 is a kinase that is involved in tau phosphorylation50, but little has been published about its role in AD in the last twenty years. It is inhibited by Fostamatinib (DB12010), a tyrosine kinase inhibitor.

We observed an association for levels of LGALS9 near *CTSH* on chr15 (index pQTL variant rs34593439), similar to CTSH and SLC25A18 discussed above. The LGALS9 association colocalizes with AD risk (PP.H4 = 0.967). LGALS9 levels correlate with lower levels of AD risk (PWAS Z = -4.88), but the protein is not causal for AD according to MR. Interestingly, other studies have observed higher levels of LGALS9 in CSF in individuals with AD, suggesting the opposite direction of effect than what we have observed here51.

Finally, we identified an association between levels of EBI3 and variants on chr19 (index pQTL variant rs4804181), intronic in *ZNF799*. This locus colocalized with AD risk (PP.H4 = 0.903) and levels of EBI3 were associated with decreased risk of AD (PWAS Z = -4.01). EBI3 makes up the β subunit of IL35, a protein that has been linked to Aβ amelioration in a mouse model of AD52.

**Proteins prioritized by PWAS and MR**

Of the 42 proteins prioritized for their link to AD, 15 of them were identified as significant through both PWAS and MR, but not colocalization. These include eight proteins regulated in *cis* (HDGF, APOBEC2, CD72, PTPA, CA12, NECTIN2, CD33, and CABLES2) and seven regulated in *trans* (PSIP1, C4BPA, CLEC4C, STX17, CRADD, LRP6, and LIMD1).

***Cis* associations implicated in AD**

We identified eight *cis* signals prioritized through both PWAS and COLOC. We first identified an association for HDGF on chr1 (index pQTL variant rs4399146, p.P201L in *HDGF*). Levels of HDGF regulated by this locus were associated with decreased risk of AD (PWAS Z = -3.63, MR β = -0.138). The locus did not colocalize (PP.H4 = 0.518), as the locus had a weak association with AD. HDGF is thought to be a neurotrophic factor supporting neuronal survival, which likely contributes to its proposed protective role in AD53. The protein is targeted by copper (DB09130).

Next, a *cis* signal was identified for APOBEC2 on chr6 (index pQTL variant rs4714422). This protein was associated with increased risk of AD (PWAS Z = 3.98, MR β = 0.129), but the locus did not colocalize with AD risk (PP.H4 = 2.96×10-7). This association is just upstream of the TREM2 locus. Loss of APOBEC2 in mice was associated with upregulation of genes related to immune response, potentially explaining an effect for this protein in AD54.

The next protein, CD72, was associated in *cis* with variants on chr9 (index pQTL variant rs7026779). Levels of CD72 regulated in *cis* were associated with decreased risk of AD (PWAS Z = -3.39, MR β = -0.106). The locus did not colocalize with AD risk (PP.H4 = 0.538) as the association with AD was weak. CD72 is involved in B cell development55 and the gene has been identified as being differentially expressed between healthy mice and mouse models of AD56.

We also identified an association on chr9 for levels of PTPA (index pQTL variant rs3118634). This protein was associated with increased risk of AD (PWAS Z = 3.47, MR β = 0.161) and the locus approached the threshold for colocalization (PP.H4 = 0.692), suggesting that it may be identified in AD risk with more samples. PTPA is a phosphatase activator of PP2A57, which is proposed as the central protein involved in dephosphorylating tau58. Levels of PTPA are lower in the brains of individuals with AD59, suggesting that abnormal localization to CSF may be driving the increased risk of AD reported here. We also observed an association for this protein with the APOE locus, and PWAS results at that locus also report a positive association (PWAS Z = 62.1).

Next, on chr15, we observed *cis* regulation of the levels of CA12 (index pQTL variant rs16946801) that was associated with increased risk of AD (PWAS Z = 5.66, MR β = 0.076). Colocalization suggested unique loci in the region for AD and CA12 levels (PP.H4 = 1.63×10-5). Evidence suggests that inhibition of carbonic anhydrases like CA12 prevents against mitochondrial toxicity in mouse models of AD60, but details of which carbonic anhydrases are relevant to AD have not been established.

Next, as discussed in the main text, we identified a *cis* association for levels of NECTIN2 on chr19 (index pQTL variant rs3810143). NECTIN2 levels were associated with decreased risk of AD (PWAS Z = -12.0, MR β = -0.685), but colocalization reported a different causal locus for AD (PP.H4 = 7.30×10-6).

Also on chr19, we identified an association for CD33 levels (index pQTL variant rs3865444, in LD with missense variant rs1245941, p.A14D in *CD33*). CD33 levels were associated with increased risk of AD (PWAS Z = 3.61, MR β = 0.034). The locus did not colocalize (PP.H4 = 0.645). As discussed in the main text, CD33 may be involved in immune dysregulation in AD.

The last *cis* association relevant to AD that we identified was for CABLES2 on chr20 (index pQTL variant rs493809, intronic in *LAMA5*). Levels of CABLES2 were associated with decreased risk of AD (PWAS Z = -3.69, MR β = -0.212), but the locus did not colocalize with AD risk (PP.H4 = 0.225). CABLES2 levels have also been associated with increased lifespan61, but the potential mechanism for its function in AD is unclear.

***Trans* associations implicated in AD**

We found seven proteins that were prioritized for AD in PWAS and MR through *trans* regulation. First, PSIP1 levels were associated with variants at the *HDGF* locus on chr1 (index pQTL variant rs4399146, p.P201L in *HDGF*). PSIP1 was associated with decreased risk of AD (PWAS Z = -3.77, MR β = -0.120). However, like with the *cis* locus for HDGF, the association did not colocalize with AD risk (PP.H4 = 0.537). PSIP1 is known to be involved in HIV integration into the genome62 but its relevance to AD is unclear.

Next, on chr3, we identified an association for C4BPA (index pQTL variant rs60852193) in an intergenic region. Regulation of C4BPA at this locus is associated with increased risk of AD (PWAS Z = 3.47, MR β = 0.161). The association does not colocalize (PP.H4 = 0.445). As mentioned in the main text, C4BPA is another protein involved in the complement system. It has also been shown to bind to Aβ63. The protein interacts with copper (DB09130) and zinc (DB01593).

The next ­*trans* association was identified for CLEC4C in an intergenic region on chr7 (index pQTL variant rs876038). CLEC4C levels are associated with decreased risk of AD (PWAS Z = -3.23, MR β = -0.117). The locus does not colocalize with AD risk (PP.H4 = 0.132). A variant in CLEC4C has been linked to amyotrophic lateral sclerosis (ALS) through an immune role64, but it has not been previously implicated in AD.

Next, two associations at the same locus on chr11 were identified for STX17 and CRADD (index pQTL variant rs3740888 intronic in *ADAMTS8*). STX17 (PWAS Z = -3.84, MR β = -0.062) and CRADD (PWAS Z = -3.53, MR β = -0.102) are both associated with decreased AD risk, but neither associations colocalize (PP.H4 = 0.693 for STX17, 0.739 for CRADD). As discussed in the main text, both proteins have potential roles in AD through lysosomal function and apoptosis, respectively.

Next, on chr15, a *trans* association was observed for LRP6 (index pQTL variant rs1427281, intronic in *ADAM10*). Levels of LRP6 were associated with increased risk of AD (PWAS Z = 5.81, MR β = 0.189) but the locus did not colocalize (PP.H4 = 0.311). As discussed in the main text, LRP6 may be involved in AD through promoting synapse function, suggesting potential mislocalization to CSF driving the increased risk.

Finally, LIMD1 was associated in *trans* with variants on chr18 (index pQTL variant rs3745060, p.K91T in *ST8SIA3*). Through PWAS and MR, LIMD1 was associated with decreased risk of AD (PWAS Z = -3.56, MR β = -0.064). The locus did not colocalize, but approached the threshold (PP.H4 = 0.710). LIMD1 is a tumor suppressor protein65, but has not been implicated in AD.

Overall, we prioritized 42 proteins relevant to AD, with 25 proteins potentially affecting AD through *cis* loci, 16 through a *trans* locus, and one (TREM2) through both *cis* and *trans* loci. The majority of these show clear potential mechanisms suggesting a function in AD. These mechanisms included immune response, interactions with Aβ or tau, or regulation of ER stress. These proteins, especially those regulated in *trans*, require both replication in external datasets and validation through functional analysis, but many represent promising potential targets for treatment in AD. Of the 42 proteins, 15 of them are linked to drugs through DrugBank66. These include those discussed in the main text (FCGR3B, SLC25A18, CASQ1, and CA12) as well as CTSH, PRSS8, ACE, EGFR, PKN1, C1S, LGALS9, APOE, HDGF, C4BPA, and CD33.

**References**

1 SOMAscan® v4.1 Data Standardization and File Specification Technical Note. (2021).

2 SOMAscan® v4.0 Data Standardization and File Specification Technical Note. (2018).

3 Chang, C. C. *et al.* Second-generation PLINK: rising to the challenge of larger and richer datasets. *GigaScience* **4** (2015). <https://doi.org:10.1186/s13742-015-0047-8>

4 Willer, C. J., Li, Y. & Abecasis, G. R. METAL: fast and efficient meta-analysis of genomewide association scans. *Bioinformatics* **26**, 2190-2191 (2010). <https://doi.org:10.1093/bioinformatics/btq340>

5 West, M. B., Wickham, S., Parks, E. E., Sherry, D. M. & Hanigan, M. H. Human GGT2 Does Not Autocleave into a Functional Enzyme: A Cautionary Tale for Interpretation of Microarray Data on Redox Signaling. *Antioxidants &amp; Redox Signaling* **19**, 1877-1888 (2013). <https://doi.org:10.1089/ars.2012.4997>

6 Yang, J., Lee, S. H., Goddard, M. E. & Visscher, P. M. GCTA: A Tool for Genome-wide Complex Trait Analysis. *The American Journal of Human Genetics* **88**, 76-82 (2011). <https://doi.org:10.1016/j.ajhg.2010.11.011>

7 Sánchez-Valle, J. *et al.* A molecular hypothesis to explain direct and inverse co-morbidities between Alzheimer’s Disease, Glioblastoma and Lung cancer. *Scientific Reports* **7** (2017). <https://doi.org:10.1038/s41598-017-04400-6>

8 Nitta, T. *et al.* IAN Family Critically Regulates Survival and Development of T Lymphocytes. *PLoS Biology* **4**, e103 (2006). <https://doi.org:10.1371/journal.pbio.0040103>

9 Evgen’ev, M. B. *et al.* Molecular Mechanisms Underlying Neuroprotective Effect of Intranasal Administration of Human Hsp70 in Mouse Model of Alzheimer’s Disease. *Journal of Alzheimer's Disease* **59**, 1415-1426 (2017). <https://doi.org:10.3233/JAD-170398>

10 Nachman, E. *et al.* Disassembly of Tau fibrils by the human Hsp70 disaggregation machinery generates small seeding-competent species. *Journal of Biological Chemistry* **295**, 9676-9690 (2020). <https://doi.org:10.1074/jbc.ra120.013478>

11 Kadomatsu, K., Kishida, S. & Tsubota, S. The heparin-binding growth factor midkine: the biological activities and candidate receptors. *The Journal of Biochemistry* **153**, 511-521 (2013). <https://doi.org:10.1093/jb/mvt035>

12 Castillo, G. M., Ngo, C., Cummings, J., Wight, T. N. & Snow, A. D. Perlecan Binds to the β-Amyloid Proteins (Aβ) of Alzheimer's Disease, Accelerates Aβ Fibril Formation, and Maintains Aβ Fibril Stability. *Journal of Neurochemistry* **69**, 2452-2465 (2002). <https://doi.org:10.1046/j.1471-4159.1997.69062452.x>

13 Skerka, C., Chen, Q., Fremeaux-Bacchi, V. & Roumenina, L. T. Complement factor H related proteins (CFHRs). *Molecular Immunology* **56**, 170-180 (2013). <https://doi.org:https://doi.org/10.1016/j.molimm.2013.06.001>

14 Ferkingstad, E. *et al.* Large-scale integration of the plasma proteome with genetics and disease. *Nature Genetics* **53**, 1712-1721 (2021). <https://doi.org:10.1038/s41588-021-00978-w>

15 Nukiwa, T. *et al.* Evaluation of "at risk" alpha 1-antitrypsin genotype SZ with synthetic oligonucleotide gene probes. *Journal of Clinical Investigation* **77**, 528-537 (1986). <https://doi.org:10.1172/jci112333>

16 Rodriguez, R. *et al.* Hepcidin Induction by Pathogens and Pathogen-Derived Molecules Is Strongly Dependent on Interleukin-6. *Infection and Immunity* **82**, 745-752 (2014). <https://doi.org:doi:10.1128/IAI.00983-13>

17 Phillips, B. *et al.* *Proteome Wide Association Studies of LRRK2 variants identify novel causal and druggable for Parkinson’s disease* (2023).

18 Park, H.-K., Kim, M.-C., Kim, S.-M. & Jo, D. J. Assessment of two missense polymorphisms (rs4762 and rs699) of the angiotensinogen gene and stroke. *Experimental and Therapeutic Medicine* **5**, 343-349 (2013). <https://doi.org:10.3892/etm.2012.790>

19 El-Garawani, I. M. *et al.* Angiotensinogen Gene Missense Polymorphisms (rs699 and rs4762): The Association of End-Stage Renal Failure Risk with Type 2 Diabetes and Hypertension in Egyptians. *Genes* **12**, 339 (2021). <https://doi.org:10.3390/genes12030339>

20 Park, K. W. *et al.* Robo4 is a vascular-specific receptor that inhibits endothelial migration. *Developmental Biology* **261**, 251-267 (2003). <https://doi.org:https://doi.org/10.1016/S0012-1606(03)00258-6>

21 Karakas, M. *et al.* A Variant In the Abo Gene Explains the Variation in Soluble E-Selectin Levels—Results from Dense Genotyping in Two Independent Populations. *PLoS ONE* **7**, e51441 (2012). <https://doi.org:10.1371/journal.pone.0051441>

22 Gorelik, A., Illes, K. & Nagar, B. Crystal Structure of the Mannose-6-Phosphate Uncovering Enzyme. *Structure* **28**, 426-436.e423 (2020). <https://doi.org:10.1016/j.str.2020.02.001>

23 Mok, A., Cao, H. & Hegele, R. A. Genomic basis of mucopolysaccharidosis type IIID (MIM 252940) revealed by sequencing of GNS encoding N-acetylglucosamine-6-sulfatase. *Genomics* **81**, 1-5 (2003). <https://doi.org:https://doi.org/10.1016/S0888-7543(02)00014-9>

24 Meyer, A. *et al.* The Mutation p.Ser298Pro in the sulphamidase gene (SGSH) is associated with a slowly progressive clinical phenotype in mucopolysaccharidosis type IIIA (Sanfilippo A Syndrome). *Human Mutation* **29**, 770-770 (2008). <https://doi.org:10.1002/humu.20738>

25 Holley, R. J. *et al.* Mucopolysaccharidosis Type I, Unique Structure of Accumulated Heparan Sulfate and Increased N-Sulfotransferase Activity in Mice Lacking α-l-iduronidase. *Journal of Biological Chemistry* **286**, 37515-37524 (2011). <https://doi.org:10.1074/jbc.m111.287474>

26 Gardner, E. *et al.* Mutation update: Review of <i>TPP1</i> gene variants associated with neuronal ceroid lipofuscinosis CLN2 disease. *Human Mutation* **40**, 1924-1938 (2019). <https://doi.org:10.1002/humu.23860>

27 Ding, Y. *et al.* Seven novel mutations of the SMPD1 gene in four Chinese patients with Niemann-Pick disease type A and prenatal diagnosis for four fetuses. *European Journal of Medical Genetics* **59**, 263-268 (2016). <https://doi.org:https://doi.org/10.1016/j.ejmg.2015.11.012>

28 Gusev, A. *et al.* Integrative approaches for large-scale transcriptome-wide association studies. *Nature Genetics* **48**, 245-252 (2016). <https://doi.org:10.1038/ng.3506>

29 Yu, G., Wang, L.-G., Han, Y. & He, Q.-Y. clusterProfiler: an R Package for Comparing Biological Themes Among Gene Clusters. *OMICS: A Journal of Integrative Biology* **16**, 284-287 (2012). <https://doi.org:10.1089/omi.2011.0118>

30 Yu, G., Wang, L.-G., Yan, G.-R. & He, Q.-Y. DOSE: an R/Bioconductor package for disease ontology semantic and enrichment analysis. *Bioinformatics* **31**, 608-609 (2015). <https://doi.org:10.1093/bioinformatics/btu684>

31 Yu, G. & He, Q.-Y. ReactomePA: an R/Bioconductor package for reactome pathway analysis and visualization. *Molecular BioSystems* **12**, 477-479 (2016). <https://doi.org:10.1039/c5mb00663e>

32 Giambartolomei, C. *et al.* Bayesian Test for Colocalisation between Pairs of Genetic Association Studies Using Summary Statistics. *PLoS Genetics* **10**, e1004383 (2014). <https://doi.org:10.1371/journal.pgen.1004383>

33 Wallace, C. A more accurate method for colocalisation analysis allowing for multiple causal variants. *PLOS Genetics* **17**, e1009440 (2021). <https://doi.org:10.1371/journal.pgen.1009440>

34 Bellenguez, C. *et al.* New insights into the genetic etiology of Alzheimer’s disease and related dementias. *Nature Genetics* **54**, 412-436 (2022). <https://doi.org:10.1038/s41588-022-01024-z>

35 Deming, Y. *et al.* The MS4A gene cluster is a key modulator of soluble TREM2 and Alzheimer’s disease risk. *Science Translational Medicine* **11**, eaau2291 (2019). <https://doi.org:10.1126/scitranslmed.aau2291>

36 Jung, J. *et al.* Newly identified tumor-associated role of human Sharpin. *Molecular and Cellular Biochemistry* **340**, 161-167 (2010). <https://doi.org:10.1007/s11010-010-0413-x>

37 Asanomi, Y. *et al.* A rare functional variant of SHARPIN attenuates the inflammatory response and associates with increased risk of late-onset Alzheimer’s disease. *Molecular Medicine* **25** (2019). <https://doi.org:10.1186/s10020-019-0090-5>

38 Palmieri, F. The mitochondrial transporter family (SLC25): physiological and pathological implications. *Pfl�gers Archiv European Journal of Physiology* **447**, 689-709 (2004). <https://doi.org:10.1007/s00424-003-1099-7>

39 Jochemsen, H. M. *et al.* The association of angiotensin-converting enzyme with biomarkers for Alzheimer’s disease. *Alzheimer's Research &amp; Therapy* **6**, 27 (2014). <https://doi.org:10.1186/alzrt257>

40 Devuyst, O., Olinger, E. & Rampoldi, L. Uromodulin: from physiology to rare and complex kidney disorders. *Nature Reviews Nephrology* **13**, 525-544 (2017). <https://doi.org:10.1038/nrneph.2017.101>

41 Schaeffer, C., Merella, S., Pasqualetto, E., Lazarevic, D. & Rampoldi, L. Mutant uromodulin expression leads to altered homeostasis of the endoplasmic reticulum and activates the unfolded protein response. *PLOS ONE* **12**, e0175970 (2017). <https://doi.org:10.1371/journal.pone.0175970>

42 Huang, H.-C., Tang, D., Lu, S.-Y. & Jiang, Z.-F. Endoplasmic reticulum stress as a novel neuronal mediator in Alzheimer’s disease. *Neurological Research* **37**, 366-374 (2015). <https://doi.org:10.1179/1743132814y.0000000448>

43 Bruban, J. *et al.* Presenilin 1 is necessary for neuronal, but not glial, EGFR expression and neuroprotection<i>via</i>γ-secretase-independent transcriptional mechanisms. *The FASEB Journal* **29**, 3702-3712 (2015). <https://doi.org:10.1096/fj.15-270645>

44 Wang, L. *et al.* Epidermal growth factor receptor is a preferred target for treating Amyloid-β–induced memory loss. *Proceedings of the National Academy of Sciences* **109**, 16743-16748 (2012). <https://doi.org:10.1073/pnas.1208011109>

45 Carpanini, S. M. *et al.* Terminal complement pathway activation drives synaptic loss in Alzheimer’s disease models. *Acta Neuropathologica Communications* **10** (2022). <https://doi.org:10.1186/s40478-022-01404-w>

46 Novarino, G. *et al.* Exome Sequencing Links Corticospinal Motor Neuron Disease to Common Neurodegenerative Disorders. *Science* **343**, 506-511 (2014). <https://doi.org:doi:10.1126/science.1247363>

47 Abisambra, J. F. *et al.* Tau Accumulation Activates the Unfolded Protein Response by Impairing Endoplasmic Reticulum-Associated Degradation. *The Journal of Neuroscience* **33**, 9498-9507 (2013). <https://doi.org:10.1523/jneurosci.5397-12.2013>

48 Wang, Q. & Michalak, M. Calsequestrin. Structure, function, and evolution. *Cell Calcium* **90**, 102242 (2020). <https://doi.org:https://doi.org/10.1016/j.ceca.2020.102242>

49 Ferreiro, E., Oliveira, C. R. & Pereira, C. U. Involvement of endoplasmic reticulum Ca2+ release through ryanodine and inositol 1,4,5-triphosphate receptors in the neurotoxic effects induced by the amyloid-? peptide. *Journal of Neuroscience Research* **76**, 872-880 (2004). <https://doi.org:10.1002/jnr.20135>

50 Yasuda, H. *et al.* PKN1 promotes synapse maturation by inhibiting mGluR-dependent silencing through neuronal glutamate transporter activation. *Communications Biology* **3** (2020). <https://doi.org:10.1038/s42003-020-01435-w>

51 Wang, X., Niu, Y., Yue, C.-x., Fu, S. & Wang, R.-t. Increased ileal bile acid binding protein and galectin-9 are associated with mild cognitive impairment and Alzheimer's disease. *Journal of Psychiatric Research* **119**, 102-106 (2019). <https://doi.org:https://doi.org/10.1016/j.jpsychires.2019.10.002>

52 Feng, W. *et al.* B lymphocytes ameliorate Alzheimer’s disease-like neuropathology via interleukin-35. *Brain, Behavior, and Immunity* **108**, 16-31 (2023). <https://doi.org:https://doi.org/10.1016/j.bbi.2022.11.012>

53 Zhou, Z. *et al.* Hepatoma-derived Growth Factor Is a Neurotrophic Factor Harbored in the Nucleus. *Journal of Biological Chemistry* **279**, 27320-27326 (2004). <https://doi.org:10.1074/jbc.m308650200>

54 Lorenzo, J. P. *et al.* APOBEC2 is a Transcriptional Repressor required for proper Myoblast Differentiation. *bioRxiv*, 2020.2007.2029.223594 (2021). <https://doi.org:10.1101/2020.07.29.223594>

55 Pan, C., Baumgarth, N. & Parnes, J. R. CD72-Deficient Mice Reveal Nonredundant Roles of CD72 in B Cell Development and Activation. *Immunity* **11**, 495-506 (1999). <https://doi.org:10.1016/s1074-7613(00)80124-7>

56 Lambracht‐Washington, D., Fu, M. & Rosenberg, R. N. DNA Aβ42 immunotherapy induces epigenetic changes of the gene expression profile in brain in the 3XTG‐AD mouse model. *Alzheimer's &amp; Dementia* **16** (2020). <https://doi.org:10.1002/alz.037191>

57 Guo, F. *et al.* Structural basis of PP2A activation by PTPA, an ATP-dependent activation chaperone. *Cell Research* **24**, 190-203 (2014). <https://doi.org:10.1038/cr.2013.138>

58 Martin, L. *et al.* Tau protein phosphatases in Alzheimer's disease: The leading role of PP2A. *Ageing Research Reviews* **12**, 39-49 (2013). <https://doi.org:https://doi.org/10.1016/j.arr.2012.06.008>

59 Luo, Y. *et al.* PTPA activates protein phosphatase-2A through reducing its phosphorylation at tyrosine-307 with upregulation of protein tyrosine phosphatase 1B. *Biochimica et Biophysica Acta (BBA) - Molecular Cell Research* **1833**, 1235-1243 (2013). <https://doi.org:https://doi.org/10.1016/j.bbamcr.2013.02.005>

60 Solesio, M. E. *et al.* Carbonic anhydrase inhibition selectively prevents amyloid β neurovascular mitochondrial toxicity. *Aging Cell* **17**, e12787 (2018). <https://doi.org:10.1111/acel.12787>

61 Perrot, N. *et al.* A trans‐omic Mendelian randomization study of parental lifespan uncovers novel aging biology and therapeutic candidates for chronic diseases. *Aging Cell* **20** (2021). <https://doi.org:10.1111/acel.13497>

62 Singh, P. K. *et al.* LEDGF/p75 interacts with mRNA splicing factors and targets HIV-1 integration to highly spliced genes. *Genes &amp; Development* **29**, 2287-2297 (2015). <https://doi.org:10.1101/gad.267609.115>

63 Trouw, L. A. *et al.* C4b-binding protein in Alzheimer's disease: Binding to Aβ1–42 and to dead cells. *Molecular Immunology* **45**, 3649-3660 (2008). <https://doi.org:https://doi.org/10.1016/j.molimm.2008.04.025>

64 Lim, S. M. *et al.* CLEC4C p.K210del variant causes impaired cell surface transport in plasmacytoid dendritic cells of amyotrophic lateral sclerosis. *Oncotarget* **7**, 24942-24949 (2016). <https://doi.org:10.18632/oncotarget.7886>

65 Sharp, T. V. *et al.* LIM domains-containing protein 1 (LIMD1), a tumor suppressor encoded at chromosome 3p21.3, binds pRB and represses E2F-driven transcription. *Proceedings of the National Academy of Sciences* **101**, 16531-16536 (2004). <https://doi.org:10.1073/pnas.0407123101>

66 Wishart, D. S. *et al.* DrugBank 5.0: a major update to the DrugBank database for 2018. *Nucleic Acids Research* **46**, D1074-D1082 (2017). <https://doi.org:10.1093/nar/gkx1037>
